# Supplementary material for: Analysis of FAIMS for the study of affinity-purified protein complexes using the orbitrap ascend tribrid mass spectrometer
Source: Royal Society of Chemistry journal article supplement (doi:10.1039/d5mo00038f), 2025-05-07
Supplement: d5mo00038f1.pdf [file d5mo00038f1.pdf]

## Supplementary Information For

### **Analysis of FAIMS for the Study of Affinity-Purified Protein Complexes Using the Orbitrap Ascend Tribrid Mass Spectrometer**

Pratik Goswami<sup>a</sup>, Joseph Cesare<sup>a,b</sup>, Michaela J. Rekowski<sup>a</sup>, Zachary Clark<sup>a</sup>, Janet Thornton<sup>a</sup>,  
Michael P. Washburn<sup>a\*</sup>

*<sup>a</sup>Department of Cancer Biology, University of Kansas Medical Center, Kansas City, KS, 66160, USA*

*<sup>b</sup>Stowers Institute for Medical Research, Kansas City, Missouri 64110, USA.*

\*To whom correspondence should be addressed:

Michael P. Washburn, Ph.D.  
Department of Cancer Biology  
University of Kansas Medical Center  
Kansas City, KS, 66160, USA  
[mwashburn4@kumc.edu](mailto:mwashburn4@kumc.edu)

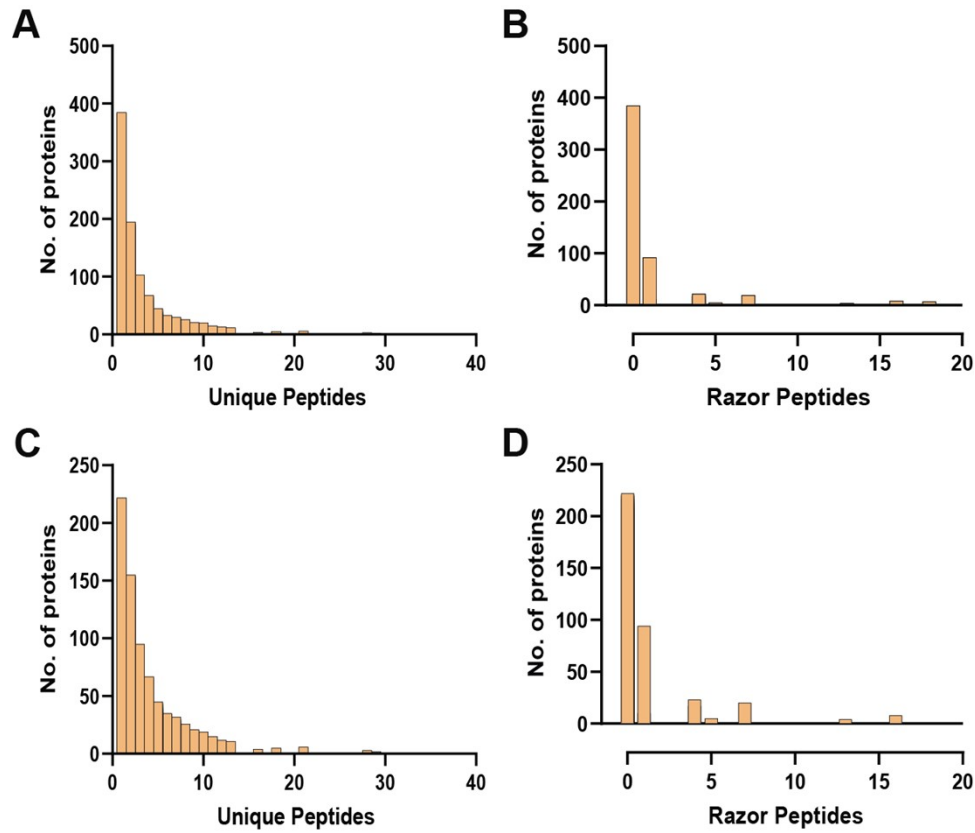

**Figure S1. Distribution of razor and unique peptides under FAIMS and No FAIMS configurations.** (A) Distribution of unique peptides with FAIMS. (B) Distribution of razor peptides with FAIMS. (C) Distribution of unique peptides with No FAIMS. (D) Distribution of razor peptides with No FAIMS.
