# Supplementary material for: Analysis of FAIMS for the study of affinity-purified protein complexes using the orbitrap ascend tribrid mass spectrometer
Source: Royal Society of Chemistry journal article supplement (doi:10.1039/d5mo00038f), 2025-05-07
Supplement: d5mo00038f3.xlsx [file d5mo00038f3.xlsx]

## Sheet: PeptideGroups
Checked	Tags	Confidence	PSM Ambiguity	Sequence	Annotated Sequence	Modifications	Modifications (all possible sites)	Qvality PEP	Qvality q-value	SVM_Score	# Protein Groups	# Proteins	# PSMs	Master Protein Accessions	Positions in Master Proteins	Modifications in Master Proteins (all Sites)	Modifications in Master Proteins	Master Protein Descriptions	Protein Accessions	# Missed Cleavages	Theo. MH+ [Da]	Sequence Length	Contaminant	Abundance Ratio: (SAP25_3_REPLICATES_NO_FAIMS) / (SAP25_3_REPLICATES_FAIMS)	Abundance Ratio (log2): (SAP25_3_REPLICATES_NO_FAIMS) / (SAP25_3_REPLICATES_FAIMS)	Abundance Ratio P-Value: (SAP25_3_REPLICATES_NO_FAIMS) / (SAP25_3_REPLICATES_FAIMS)	Abundance Ratio Adj. P-Value: (SAP25_3_REPLICATES_NO_FAIMS) / (SAP25_3_REPLICATES_FAIMS)	Abundances (Grouped): SAP25_3_REPLICATES_FAIMS	Abundances (Grouped): SAP25_3_REPLICATES_NO_FAIMS	Abundances (Grouped) CV [%]: SAP25_3_REPLICATES_FAIMS	Abundances (Grouped) CV [%]: SAP25_3_REPLICATES_NO_FAIMS	Abundances (Grouped) Count: SAP25_3_REPLICATES_FAIMS	Abundances (Grouped) Count: SAP25_3_REPLICATES_NO_FAIMS	Abundance: F6: Sample, SAP25_3_REPLICATES_FAIMS	Abundance: F7: Sample, SAP25_3_REPLICATES_FAIMS	Abundance: F10: Sample, SAP25_3_REPLICATES_FAIMS	Abundance: F11: Sample, SAP25_3_REPLICATES_FAIMS	Abundance: F14: Sample, SAP25_3_REPLICATES_FAIMS	Abundance: F15: Sample, SAP25_3_REPLICATES_FAIMS	Abundance: F8: Sample, SAP25_3_REPLICATES_NO_FAIMS	Abundance: F9: Sample, SAP25_3_REPLICATES_NO_FAIMS	Abundance: F12: Sample, SAP25_3_REPLICATES_NO_FAIMS	Abundance: F13: Sample, SAP25_3_REPLICATES_NO_FAIMS	Abundance: F16: Sample, SAP25_3_REPLICATES_NO_FAIMS	Abundance: F17: Sample, SAP25_3_REPLICATES_NO_FAIMS	Abundances (Normalized): F6: Sample, SAP25_3_REPLICATES_FAIMS	Abundances (Normalized): F7: Sample, SAP25_3_REPLICATES_FAIMS	Abundances (Normalized): F10: Sample, SAP25_3_REPLICATES_FAIMS	Abundances (Normalized): F11: Sample, SAP25_3_REPLICATES_FAIMS
FALSE		High	Unambiguous	MSMKEVDEQMLNVQNK	[R].MSMKEVDEQMLNVQNK.[N]	3xOxidation [M1; M3; M10]	3xOxidation [M1; M3; M10]	0.0772958	0.00514875	0.378	2	4	1	P07437; Q9BVA1	P07437 [321-336]; Q9BVA1 [321-336]			tubulin beta chain [OS=Homo sapiens] Tubulin beta-2B chain [OS=Homo sapiens]	Q13885; P07437; P68371; Q9BVA1	1	1971.88	16	FALSE
FALSE		High	Unambiguous	IVGGYTCAANSIPYQVSLNSGSHFCGGSLINSQWVVSAAHCYKSR	[K].IVGGYTCAANSIPYQVSLNSGSHFCGGSLINSQWVVSAAHCYKSR.[I]	3xCarbamidomethyl [C7; C25; C41]; 2xMethyl [K43(100); R45(100)]	3xCarbamidomethyl [C7; C25; C41]; 2xMethyl [K43(100); R45(100)]	0.0450078	0.00272876	0.476	1	1	1	P00761	P00761 [9-53]	P00761 2xMethyl [K51(100); R53(100)]	P00761 2xMethyl [K51(100); R53(100)]	Trypsin OS=Sus scrofa PE=1 SV=1	P00761	1	4931.35	45	TRUE
FALSE		High	Unambiguous	VHCCPHGAFCDLVHTR	[R].VHCCPHGAFCDLVHTR.[C]	3xCarbamidomethyl [C3; C4; C10]	3xCarbamidomethyl [C3; C4; C10]	0.102201	0.0064943	0.326	1	2	4	P28799	P28799 [162-177]			Granulins [OS=Homo sapiens]	P28799-2; P28799	0	1965.86	16	FALSE
FALSE		High	Unambiguous	SCAAAGTECLISGWGNTKSSGSSYPSLLQCLK	[R].SCAAAGTECLISGWGNTKSSGSSYPSLLQCLK.[A]	3xCarbamidomethyl [C2; C9; C30]; 2xMethyl [K18(100); K32(100)]	3xCarbamidomethyl [C2; C9; C30]; 2xMethyl [K18(100); K32(100)]	0.000258626	0.0010893	1.388	1	1	1	P00761	P00761 [116-147]	P00761 2xMethyl [K133(100); K147(100)]	P00761 2xMethyl [K133(100); K147(100)]	Trypsin OS=Sus scrofa PE=1 SV=1	P00761	1	3418.61	32	TRUE
FALSE		High	Unambiguous	RPASPSSPEHLPATPAESPAQR	[K].RPASPSSPEHLPATPAESPAQR.[F]	2xPhospho [S/T]	2xPhospho [S4(66.7); S6(66.7); S7(66.7); T14(0); S18(0)]	0.0565373	0.00272876	0.435	1	1	10	Q9H7L9	Q9H7L9 [231-252]			Sin3 histone deacetylase corepressor complex component SDS3 [OS=Homo sapiens]	Q9H7L9	0	2443.08	22	FALSE	0.01	-6.64			104188		40.29		4		27634.3	22420.4	52401.1	50819.1									59282.6	78101.5	141816	138987
FALSE		High	Unambiguous	EAEDNIREMLMAR	[K].EAEDNIREMLMAR.[R]	2xOxidation [M9; M11]	2xOxidation [M9; M11]	0.0019604	0.0010893	1.031	1	1	15	O60925	O60925 [107-119]			prefoldin subunit 1 [OS=Homo sapiens]	O60925	1	1609.73	13	FALSE	21.976	4.46	0.162116	0.351432	83911.8	1.84404e+06	133.42	10.89	5	2	1.72055e+06	1.2563e+06	31005.5	16208.4		13280.5	1.68493e+06	1.90651e+06					3.69101e+06	4.37632e+06	83911.8	44328.9
FALSE		High	Unambiguous	LYQSAGGMPGGMPGGFPGGGAPPSGGASSGPTIEEVD	[K].LYQSAGGMPGGMPGGFPGGGAPPSGGASSGPTIEEVD.[-]	2xOxidation [M8; M12]	2xOxidation [M8; M12]	1.53878e-08	0.0010893	3.101	1	1	7	P11142-1	P11142-1 [610-646]			Heat shock cognate 71 kDa protein [OS=Homo sapiens]	P11142-1	0	3378.49	37	FALSE	100	6.64				3.58705e+06		39.89		2							4731193	2.56914e+06
FALSE		High	Unambiguous	LDSELKNMQDMVEDYR	[R].LDSELKNMQDMVEDYR.[N]	2xOxidation [M8; M11]	2xOxidation [M8; M11]	4.11576e-06	0.0010893	2.117	1	1	27	KRT1	KRT1 [252-267]			Keratin, type II cytoskeletal 1 OS=Homo sapiens GN=KRT1 PE=1 SV=6	KRT1	1	2017.88	16	TRUE	0.786	-0.35	0.166483	0.356119	682111	536184	72.03	49.89	6	6	1.12612e+06	681797	262090	238233	278036	314365	1.04508e+06	1.09984e+06	524957	515687	265536	400333	2.41582e+06	2.37504e+06	709310	651553
FALSE		High	Unambiguous	NLSNEEMIQAADELEEMKR	[R].NLSNEEMIQAADELEEMKR.[V]	2xOxidation [M7; M17]	2xOxidation [M7; M17]	0.000123603	0.0010893	1.518	1	2	7	Q15170	Q15170 [119-137]			transcription elongation factor A protein-like 1 [OS=Homo sapiens]	Q15170; Q15170-2	1	2282.03	19	FALSE	7.049	2.82	0.0434063	0.170978	864780	6.09571e+06	18.76	0.24	2	2	460667	217235					6026901	5.82421e+06					988246	756739
FALSE		High	Unambiguous	VPVFRPMDLMVEASPR	[R].VPVFRPMDLMVEASPR.[R]	2xOxidation [M7; M10]	2xOxidation [M7; M10]	0.00466244	0.0010893	0.878	1	2	6	P63151	P63151 [154-169]			Serine/threonine-protein phosphatase 2A 55 kDa regulatory subunit B alpha isoform [OS=Homo sapiens]	P63151-2; P63151	0	1875.95	16	FALSE	0.01	-6.64			879596		45.32		2		571564	181137											1.22615e+06	630991
FALSE		High	Unambiguous	SFNLPMLMLGGGGYTIR	[K].SFNLPMLMLGGGGYTIR.[N]	2xOxidation [M6; M8]	2xOxidation [M6; M8]	1.63433e-07	0.0010893	2.685	1	1	6	Q13547	Q13547 [290-306]			histone deacetylase 1 [OS=Homo sapiens]	Q13547	0	1858.92	17	FALSE	0.01	-6.64			658227		32.21		2		386872	149861											829939	522042
FALSE		High	Unambiguous	VSGLMMANHTSISSLFER	[R].VSGLMMANHTSISSLFER.[T]	2xOxidation [M5; M6]	2xOxidation [M5; M6]	5.58064e-05	0.0010893	1.658	1	1	5	P23258	P23258 [373-390]			tubulin gamma-1 chain [OS=Homo sapiens]	P23258	0	2011.96	18	FALSE	0.01	-6.64			51519.8		115.34		5		286971	178839	19036.6	13026.8		20346.3							615626	622986	51519.8	35627.5
FALSE		High	Unambiguous	LKEPMDVDVEDYYPAFLDMVR	[R].LKEPMDVDVEDYYPAFLDMVR.[S]	2xOxidation [M5; M19]	2xOxidation [M5; M19]	1.03522e-06	0.0010893	2.36	1	1	12	Q96ST3	Q96ST3 [947-967]			Paired amphipathic helix protein Sin3a [OS=Homo sapiens]	Q96ST3	1	2577.19	21	FALSE	0.837	-0.26	0.477528	0.676497	2.13139e+07	1.78468e+07	84.67	0.66	3	2	9935370	6.22974e+06	119835				17697418	17001736					2.13139e+07	2.17013e+07	324317
FALSE		High	Unambiguous	SDLEMQYETLQEELMALKK	[K].SDLEMQYETLQEELMALKK.[N]	2xOxidation [M5; M15]	2xOxidation [M5; M15]	0.0404682	0.00272876	0.495	1	1	7	KRT9	KRT9 [272-290]			Keratin, type I cytoskeletal 9 OS=Homo sapiens GN=KRT9 PE=1 SV=3	KRT9	1	2331.11	19	TRUE	1.036	0.05	0.396677	0.615994	5.71266e+06	5.91865e+06	17.06	11.23	6	6	2.77703e+06	1.72779e+06	1.76347e+06	1.41405e+06	2.7286e+06	2625291	6309993	6.17896e+06	4571498	5234756	4.62395e+06	5249580	5.95743e+06	6.01875e+06	4.77258e+06	3.86734e+06
FALSE		High	Unambiguous	AVSMLEADHMLPSR	[R].AVSMLEADHMLPSR.[I]	2xOxidation [M4; M10]	2xOxidation [M4; M10]	0.092357	0.00584769	0.345	1	2	1	Q99959	Q99959 [356-369]			Plakophilin-2 [OS=Homo sapiens]	Q99959; Q99959-2	0	1588.75	14	FALSE
FALSE		High	Unambiguous	TLMELLNQMDGFDTLHR	[R].TLMELLNQMDGFDTLHR.[V]	2xOxidation [M3; M9]	2xOxidation [M3; M9]	0.0340032	0.00194901	0.526	1	1	6	P62333	P62333 [256-272]			26S proteasome regulatory subunit 10B [OS=Homo sapiens]	P62333	0	2065.97	17	FALSE	0.01	-6.64			495060		0.53		2		231632	141587											496908	493218
FALSE		High	Unambiguous	MSMKEVDEQMLNVQNK	[R].MSMKEVDEQMLNVQNK.[N]	2xOxidation [M3; M10]	2xOxidation [M3; M10]	0.00507539	0.0010893	0.863	2	4	3	P07437; Q9BVA1	P07437 [321-336]; Q9BVA1 [321-336]			tubulin beta chain [OS=Homo sapiens] Tubulin beta-2B chain [OS=Homo sapiens]	Q13885; P07437; P68371; Q9BVA1	1	1955.89	16	FALSE	0.01	-6.64			179449		19.72		2		72694.4	59277											155948	206492
FALSE		High	Unambiguous	AMQDAEVSKSDIGEVILVGGMTR	[K].AMQDAEVSKSDIGEVILVGGMTR.[M]	2xOxidation [M2; M21]	2xOxidation [M2; M21]	0.0307276	0.00194901	0.544	1	1	2	P38646	P38646 [369-391]			Stress-70 protein, mitochondrial [OS=Homo sapiens]	P38646	1	2438.19	23	FALSE
FALSE		High	Unambiguous	GMDEVYNLFYVNNNWYIFMR	[R].GMDEVYNLFYVNNNWYIFMR.[L]	2xOxidation [M2; M19]	2xOxidation [M2; M19]	0.000137688	0.0010893	1.499	1	1	4	Q96ST3	Q96ST3 [878-897]			Paired amphipathic helix protein Sin3a [OS=Homo sapiens]	Q96ST3	0	2620.16	20	FALSE
FALSE		High	Unambiguous	TMTQKDVEDMFSR	[R].TMTQKDVEDMFSR.[F]	2xOxidation [M2; M10]	2xOxidation [M2; M10]	0.136226	0.00935831	0.271	1	2	1	Q15717	Q15717 [116-128]			ELAV-like protein 1 [OS=Homo sapiens]	Q15717-2; Q15717	1	1619.7	13	FALSE
FALSE		High	Unambiguous	MMVADVFSHR	[R].MMVADVFSHR.[F]	2xOxidation [M1; M2]	2xOxidation [M1; M2]	4.10658e-05	0.0010893	1.712	1	1	5	P51784	P51784 [540-549]			Ubiquitin carboxyl-terminal hydrolase 11 [OS=Homo sapiens]	P51784	0	1224.55	10	FALSE	0.178	-2.49	0.785707	0.881705	3.61986e+06	645348	83.27	114.9	3	4	1.70024e+06	1.03914e+06	34873.9				7974776	8930829	34428.5	51546.1			3.64745e+06	3.61986e+06	94381.3
FALSE		High	Unambiguous	MLSGGFGYSPFLSITDGNMPGTRPASR	[R].MLSGGFGYSPFLSITDGNMPGTRPASR.[R]	2xOxidation [M1; M19]	2xOxidation [M1; M19]	0.00126701	0.0010893	1.108	1	1	7	Q15773	Q15773 [30-56]			Myeloid leukemia factor 2 [OS=Homo sapiens]	Q15773	0	2848.34	27	FALSE
FALSE		High	Unambiguous	NVSTGDVNVEMNAAPGVDLTQLLNNMR	[R].NVSTGDVNVEMNAAPGVDLTQLLNNMR.[S]	2xOxidation [M11; M26]	2xOxidation [M11; M26]	2.29797e-07	0.0010893	2.625	1	1	4	KRT10	KRT10 [296-322]			Keratin, type I cytoskeletal 10 OS=Homo sapiens GN=KRT10 PE=1 SV=6	KRT10	0	2904.38	27	TRUE
FALSE		High	Unambiguous	RFDDAVVQSDMKHWPFMVVNDAGRPK	[R].RFDDAVVQSDMKHWPFMVVNDAGRPK.[V]	2xOxidation [M11; M17]; 1xGG [K12]	2xOxidation [M11; M17]; 1xGG [K12]	0.0685553	0.00434873	0.4	1	2	4	P11142-1	P11142-1 [77-102]			Heat shock cognate 71 kDa protein [OS=Homo sapiens]	P11142-1; P11142-2	2	3191.51	26	FALSE
FALSE		High	Unambiguous	FDDAVVQSDMKHWPFMVVNDAGRPK	[R].FDDAVVQSDMKHWPFMVVNDAGRPK.[V]	2xOxidation [M10; M16]; 1xGG [K11]	2xOxidation [M10; M16]; 1xGG [K11]	0.0587688	0.00272876	0.428	1	2	4	P11142-1	P11142-1 [78-102]			Heat shock cognate 71 kDa protein [OS=Homo sapiens]	P11142-1; P11142-2	1	3035.41	25	FALSE
FALSE		High	Unambiguous	ATAGDTHLGGEDFDNRLVNHFMEEFRR	[K].ATAGDTHLGGEDFDNRLVNHFMEEFRR.[K]	2xMethyl [R26(100); R27(100)]	2xMethyl [R16(0); R26(100); R27(100)]	0.0752227	0.00434873	0.383	1	2	1	P17066	P17066 [223-249]	P17066 2xMethyl [R238(0); R248(100); R249(100)]	P17066 2xMethyl [R248(100); R249(100)]	Heat shock 70 kDa protein 6 [OS=Homo sapiens]	P48741; P17066	2	3162.48	27	FALSE
FALSE		High	Unambiguous	AYGQQYWGQPGNRGGYR	[R].AYGQQYWGQPGNRGGYR.[N]	2xMethyl [R13(100); R17(100)]	2xMethyl [R13(100); R17(100)]	0.00304958	0.0010893	0.953	1	1	9	Q1KMD3	Q1KMD3 [672-688]	Q1KMD3 2xMethyl [R684(100); R688(100)]	Q1KMD3 2xMethyl [R684(100); R688(100)]	heterogeneous nuclear ribonucleoprotein U-like protein 2 [OS=Homo sapiens]	Q1KMD3	1	1985.94	17	FALSE	0.379	-1.4	0.128717	0.303471	563513	213676	33.96	79.2	6	4	268242	244102	226597	201769	153190	167408	418527	390745			90659.6	40293.6	575447	850330	613252	551826
FALSE		High	Unambiguous	RNSTIPTKQTQIFTTYSDNQPGVLIQVYEGER	[K].RNSTIPTKQTQIFTTYSDNQPGVLIQVYEGER.[A]	2xMethyl [R1(100); K8(100)]	2xMethyl [R1(100); K8(100); R32(0)]	0.102201	0.0064943	0.326	2	3	1	P0DMV8; P34931	P0DMV8 [416-447]; P34931 [418-449]	P0DMV8 2xMethyl [R416(100); K423(100); R447(0)]; P34931 2xMethyl [R418(100); K425(100); R449(0)]	P0DMV8 2xMethyl [R416(100); K423(100)]; P34931 2xMethyl [R418(100); K425(100)]	heat shock 70 kDa protein 1A [OS=Homo sapiens] Heat shock 70 kDa protein 1-like [OS=Homo sapiens]	P0DMV8-2; P0DMV8; P34931	2	3711.9	32	FALSE
FALSE		High	Unambiguous	ETDAFVCRPNAALCR	[R].ETDAFVCRPNAALCR.[V]	2xCarbamidomethyl [C7; C14]	2xCarbamidomethyl [C7; C14]	0.0587688	0.00272876	0.428	1	3	2	Q8WWK9-1	Q8WWK9-1 [661-675]			Cytoskeleton-associated protein 2 [OS=Homo sapiens]	Q8WWK9-6; Q8WWK9-5; Q8WWK9-1	0	1779.83	15	FALSE
FALSE		High	Unambiguous	LVTSPCCIVTSTYGWTANMER	[R].LVTSPCCIVTSTYGWTANMER.[I]	2xCarbamidomethyl [C6; C7]	2xCarbamidomethyl [C6; C7]	0.000206073	0.0010893	1.428	1	2	5	P07900	P07900 [592-612]			Heat shock protein HSP 90-alpha [OS=Homo sapiens]	P07900-2; P07900	0	2446.12	21	FALSE
FALSE		High	Unambiguous	GLPWSCSVEDVQNFLSDCTIHDGAAGVHFIYTR	[R].GLPWSCSVEDVQNFLSDCTIHDGAAGVHFIYTR.[E]	2xCarbamidomethyl [C6; C18]	2xCarbamidomethyl [C6; C18]	0.00540123	0.0010893	0.852	1	1	2	P52597	P52597 [17-49]			Heterogeneous nuclear ribonucleoprotein F [OS=Homo sapiens]	P52597	0	3751.73	33	FALSE
FALSE		High	Unambiguous	VRPGFCFHLCSR	[R].VRPGFCFHLCSR.[A]	2xCarbamidomethyl [C6; C10]	2xCarbamidomethyl [C6; C10]	0.0674377	0.00434873	0.403	1	1	3	Q08211	Q08211 [768-779]			Atp-dependent rna helicase a [OS=Homo sapiens]	Q08211	0	1535.74	12	FALSE	100	6.64				270593		30.7		4							247058	199376	391482	292523
FALSE		High	Unambiguous	EAESCDCLQGFQLTHSLGGGTGSGMGTLLISK	[K].EAESCDCLQGFQLTHSLGGGTGSGMGTLLISK.[I]	2xCarbamidomethyl [C5; C7]; 1xOxidation [M25]	2xCarbamidomethyl [C5; C7]; 1xOxidation [M25]	0.00793358	0.0010893	0.784	3	5	4	P04350; Q3ZCM7; P07437	P04350 [123-154]; Q3ZCM7 [123-154]; P07437 [123-154]			Tubulin beta-4A chain [OS=Homo sapiens] tubulin beta-8 chain [OS=Homo sapiens] tubulin beta chain [OS=Homo sapiens]	P04350; A6NNZ2; Q3ZCM7; P07437; P68371	0	3327.53	32	FALSE
FALSE		High	Unambiguous	EAESCDCLQGFQLTHSLGGGTGSGMGTLLISK	[K].EAESCDCLQGFQLTHSLGGGTGSGMGTLLISK.[I]	2xCarbamidomethyl [C5; C7]	2xCarbamidomethyl [C5; C7]	1.07721e-06	0.0010893	2.353	3	5	12	P04350; Q3ZCM7; P07437	P04350 [123-154]; Q3ZCM7 [123-154]; P07437 [123-154]			Tubulin beta-4A chain [OS=Homo sapiens] tubulin beta-8 chain [OS=Homo sapiens] tubulin beta chain [OS=Homo sapiens]	P04350; A6NNZ2; Q3ZCM7; P07437; P68371	0	3311.53	32	FALSE
FALSE		High	Unambiguous	VNFCPLPSEQCYQAPGGPEDR	[R].VNFCPLPSEQCYQAPGGPEDR.[G]	2xCarbamidomethyl [C4; C11]	2xCarbamidomethyl [C4; C11]	1.80623e-06	0.0010893	2.262	1	1	4	Q15654-1	Q15654-1 [44-64]			thyroid receptor-interacting protein 6 [OS=Homo sapiens]	Q15654-1	0	2421.06	21	FALSE	0.01	-6.64			706205		19.4		2				299573	224919											810752	615140
FALSE		High	Unambiguous	SCAAAGTECLISGWGNTK	[R].SCAAAGTECLISGWGNTK.[S]	2xCarbamidomethyl [C2; C9]	2xCarbamidomethyl [C2; C9]	3.74984e-05	0.0010893	1.728	1	1	13	P00761	P00761 [116-133]			Trypsin OS=Sus scrofa PE=1 SV=1	P00761	0	1882.84	18	TRUE
FALSE		High	Unambiguous	GLRPVAPATGHWNGQQAPPDAGFPVVCCEDVFLSDPLLPR	[R].GLRPVAPATGHWNGQQAPPDAGFPVVCCEDVFLSDPLLPR.[G]	2xCarbamidomethyl [C27; C28]; 1xMethyl [R3(100)]	2xCarbamidomethyl [C27; C28]; 1xMethyl [R3(100); R40(0)]	8.90019e-08	0.0010893	2.792	1	1	27	Q8TEE9	Q8TEE9 [52-91]	Q8TEE9 1xMethyl [R54(100); R91(0)]	Q8TEE9 1xMethyl [R54(100)]	Histone deacetylase complex subunit SAP25 [OS=Homo sapiens]	Q8TEE9	0	4355.15	40	FALSE	0.978	-0.03	0.552347	0.711141	9.22823e+07	9.02555e+07	31.91	9.68	6	6	36988844	26010074	11965448	34366192	46701180	46157004	8.4918e+07	6.92089e+07	8.42345e+07	9.44902e+07	7.38206e+07	81905906	7.93504e+07	9.06061e+07	3.23828e+07	9.39894e+07
FALSE		High	Unambiguous	GLRPVAPATGHWNGQQAPPDAGFPVVCCEDVFLSDPLLPR	[R].GLRPVAPATGHWNGQQAPPDAGFPVVCCEDVFLSDPLLPR.[G]	2xCarbamidomethyl [C27; C28]	2xCarbamidomethyl [C27; C28]	1.29323e-09	0.0010893	3.537	1	1	120	Q8TEE9	Q8TEE9 [52-91]			Histone deacetylase complex subunit SAP25 [OS=Homo sapiens]	Q8TEE9	0	4341.13	40	FALSE	0.777	-0.36	0.160142	0.350611	3.2071e+08	2.49152e+08	21.7	8.44	6	6	1.49352e+08	9.96342e+07	1.18618e+08	1.14912e+08	7.81928e+07	1.7941e+08	250907851	221885427	218220743	244196892	226780243	2.36962e+08	3.20397e+08	3.47076e+08	3.21023e+08	3.14277e+08
FALSE		High	Unambiguous	CPGESSHICDFIR	[R].CPGESSHICDFIR.[K]	2xCarbamidomethyl [C1; C9]	2xCarbamidomethyl [C1; C9]	0.00380306	0.0010893	0.914	1	2	6	P50897	P50897 [152-164]			Palmitoyl-protein thioesterase 1 [OS=Homo sapiens]	P50897-2; P50897	0	1577.68	13	FALSE	0.01	-6.64			192820		40.82		6		155000	77854.2	77560.5	64763.8	54488.4	56615.3							332515	271205	209906	177125
FALSE		High	Unambiguous	CPFLLDNCLGTSQWPPR	[R].CPFLLDNCLGTSQWPPR.[R]	2xCarbamidomethyl [C1; C8]	2xCarbamidomethyl [C1; C8]	0.00010306	0.0010893	1.55	1	1	25	P51784	P51784 [694-710]			Ubiquitin carboxyl-terminal hydrolase 11 [OS=Homo sapiens]	P51784	0	2060.97	17	FALSE	1.332	0.41	0.0538139	0.195302	2.76976e+06	3.68917e+06	22.93	6.31	6	6	1.36975e+06	674811	907969	954587	1.68263e+06	1.85197e+06	3.65684e+06	3.75687e+06	3.25371e+06	3.49193e+06	3.28314e+06	3.14001e+06	2.93846e+06	2.3507e+06	2.45729e+06	2.61074e+06
FALSE		High	Unambiguous	CPFLLDNCLGTSQWPPRR	[R].CPFLLDNCLGTSQWPPRR.[R]	2xCarbamidomethyl [C1; C8]	2xCarbamidomethyl [C1; C8]	0.00983367	0.0010893	0.746	1	1	18	P51784	P51784 [694-711]			Ubiquitin carboxyl-terminal hydrolase 11 [OS=Homo sapiens]	P51784	1	2217.07	18	FALSE	100	6.64				750626		58.94		6							542765	576198	1852887	1.74575e+06	620346	629370
FALSE		High	Unambiguous	CHTIMNCTR	[R].CHTIMNCTR.[T]	2xCarbamidomethyl [C1; C7]; 1xOxidation [M5]	2xCarbamidomethyl [C1; C7]; 1xOxidation [M5]	0.0340032	0.00194901	0.526	1	1	6	P21912	P21912 [243-251]			Succinate dehydrogenase [ubiquinone] iron-sulfur subunit, mitochondrial [OS=Homo sapiens]	P21912	0	1208.5	9	FALSE	0.01	-6.64			92118.2		143.63		6		40324.6	166954	38177	35867	6823.39	6707.1							86506.5	581586	103321	98094
FALSE		High	Unambiguous	CHTIMNCTR	[R].CHTIMNCTR.[T]	2xCarbamidomethyl [C1; C7]	2xCarbamidomethyl [C1; C7]	0.00176027	0.0010893	1.05	1	1	10	P21912	P21912 [243-251]			Succinate dehydrogenase [ubiquinone] iron-sulfur subunit, mitochondrial [OS=Homo sapiens]	P21912	0	1192.5	9	FALSE	0.252	-1.99	0.136025	0.31383	1.06256e+06	267624	80.59	126.55	6	6	251880	528682	1240399	1.18099e+06	206646	293803	217622	310906	2.29161e+06	2.25963e+06	44790.6	59044.4	540347	1.84166e+06	3.35696e+06	3.22994e+06
FALSE		High	Unambiguous	CPVTVCGDVHGQFHDLMELFR	[R].CPVTVCGDVHGQFHDLMELFR.[I]	2xCarbamidomethyl [C1; C6]	2xCarbamidomethyl [C1; C6]	0.000365675	0.0010893	1.327	1	3	5	P62714	P62714 [50-70]			serine/threonine-protein phosphatase 2A catalytic subunit beta isoform [OS=Homo sapiens]	P62714; P67775; P67775-2	0	2517.15	21	FALSE	0.01	-6.64			136427		45.22		6		32221.6	20266.6	51700.4	56103	57668.4	110700							69123.5	70598.6	139920	153438
FALSE		High	Unambiguous	CSVCGGAIMPEPGQEETVR	[R].CSVCGGAIMPEPGQEETVR.[I]	2xCarbamidomethyl [C1; C4]	2xCarbamidomethyl [C1; C4]	0.0133395	0.0010893	0.692	1	1	4	Q15654-1	Q15654-1 [399-417]			thyroid receptor-interacting protein 6 [OS=Homo sapiens]	Q15654-1	0	2076.91	19	FALSE	0.01	-6.64			26617.1		92.14		5			2878.56	37017.1	33505.6	11539.2	5640.47								10027.5	100181	91635.7
FALSE		High	Unambiguous	EGPPAAPAAAAPGYGQSCCLIEDGER	[R].EGPPAAPAAAAPGYGQSCCLIEDGER.[C]	2xCarbamidomethyl [C18; C19]	2xCarbamidomethyl [C18; C19]	0.0009596	0.0010893	1.157	1	3	2	Q9HAJ7	Q9HAJ7 [12-37]			Histone deacetylase complex subunit SAP30L [OS=Homo sapiens]	Q9HAJ7-3; Q9HAJ7; Q9HAJ7-2	0	2644.18	26	FALSE
FALSE		High	Unambiguous	KVLISDSLDPCCR	[R].KVLISDSLDPCCR.[K]	2xCarbamidomethyl [C11; C12]	2xCarbamidomethyl [C11; C12]	0.00673404	0.0010893	0.813	1	1	9	O43175	O43175 [8-20]			D-3-phosphoglycerate dehydrogenase [OS=Homo sapiens]	O43175	1	1562.77	13	FALSE	100	6.64				437183		33.8		4								365750	470957	502783	174821
FALSE		High	Unambiguous	ANTHLLLGMCLDACAR	[K].ANTHLLLGMCLDACAR.[Y]	2xCarbamidomethyl [C10; C14]; 1xOxidation [M9]	2xCarbamidomethyl [C10; C14]; 1xOxidation [M9]	0.0732014	0.00434873	0.388	1	1	1	Q6DKK2	Q6DKK2 [230-245]			tetratricopeptide repeat protein 19, mitochondrial [OS=Homo sapiens]	Q6DKK2	0	1831.86	16	FALSE
FALSE		High	Unambiguous	QATKDAGVIAGLNVLRIINEPTAAAIAYGLDR	[R].QATKDAGVIAGLNVLRIINEPTAAAIAYGLDR.[T]	1xPhospho [T3(100)]	1xPhospho [T3(100); T22(0); Y28(0)]	0.000981622	0.0010893	1.153	1	2	1	P0DMV8	P0DMV8 [156-187]	P0DMV8 1xPhospho [T158(100); T177(0); Y183(0)]	P0DMV8 1xPhospho [T158(100)]	heat shock 70 kDa protein 1A [OS=Homo sapiens]	P0DMV8-2; P0DMV8	2	3374.78	32	FALSE
FALSE		High	Unambiguous	RNTTIPTKQTQTFTTYSDNQPGVLIQVYEGER	[K].RNTTIPTKQTQTFTTYSDNQPGVLIQVYEGER.[A]	1xPhospho [T/Y/S]; 1xAcetyl [K8(100)]	1xPhospho [T3(19.9); T4(19.9); T7(19.9); T10(19.9); T12(19.9); T14(0.2); T15(0.2); Y16(0); S17(0); Y28(0)]; 1xAcetyl [K8(100)]	0.0332467	0.00194901	0.53	1	2	10	P11142-1	P11142-1 [416-447]	P11142-1 1xAcetyl [K423(100)]	P11142-1 1xAcetyl [K423(100)]	Heat shock cognate 71 kDa protein [OS=Homo sapiens]	P11142-1; P11142-2	2	3807.82	32	FALSE	100	6.64				3.56174e+06		32.75		4							1580441			3.48361e+06	2.95211e+06	3.2306e+06
FALSE		High	Unambiguous	IINEASQFKPK	[K].IINEASQFKPK.[G]	1xPhospho [S6(100)]; 2xAcetyl [K9(100); K11(100)]	1xPhospho [S6(100)]; 2xAcetyl [K9(100); K11(100)]	0.119058	0.00860454	0.297	1	1	7	Q8N3K9	Q8N3K9 [815-825]	Q8N3K9 1xPhospho [S820(100)]; 2xAcetyl [K823(100); K825(100)]	Q8N3K9 1xPhospho [S820(100)]; 2xAcetyl [K823(100); K825(100)]	Cardiomyopathy-associated protein 5 [OS=Homo sapiens]	Q8N3K9	0	1438.7	11	FALSE	100	6.64				297820		61.64		4							200518	188678			353929	594212
FALSE		High	Unambiguous	QGSKKPLLEDDPQGAR	[R].QGSKKPLLEDDPQGAR.[K]	1xPhospho [S3(100)]	1xPhospho [S3(100)]	0.0807231	0.00514875	0.37	1	1	6	Q969R5-1	Q969R5-1 [643-658]	Q969R5-1 1xPhospho [S645(100)]	Q969R5-1 1xPhospho [S645(100)]	Lethal(3)malignant brain tumor-like protein 2 [OS=Homo sapiens]	Q969R5-1	1	1818.87	16	FALSE	0.47	-1.09	0.0192202	0.0958991	604300	284315	29.31	43.37	6	6	320051	202269	143513	129028	230581	347267	348945	382089	80816.7	228649	177158	315391	686591	704604	388397	352884
FALSE		High	Unambiguous	EELGFRPEYSASQLK	[R].EELGFRPEYSASQLK.[G]	1xPhospho [S12(100)]	1xPhospho [Y9(0); S10(0); S12(100)]	0.111803	0.00726596	0.309	1	1	4	P09874	P09874 [168-182]	P09874 1xPhospho [Y176(0); S177(0); S179(100)]	P09874 1xPhospho [S179(100)]	Poly [ADP-ribose] polymerase 1 [OS=Homo sapiens]	P09874	0	1833.84	15	FALSE	3.599	1.85	0.0750478	0.228683	183789	661492	93.44	1.31	6	2	422635	266167	61348.4	74387.8	64974.8	68328.2	646904	638987					906658	927194	166031	203446
FALSE		High	Unambiguous	ISVYYNEASSHKYVPR	[R].ISVYYNEASSHKYVPR.[A]	1xPhospho [S/Y]	1xPhospho [S2(0); Y4(0); Y5(0); S9(50); S10(50); Y13(0)]	0.00341524	0.0010893	0.933	1	1	5	Q13509	Q13509 [47-62]			tubulin beta-3 chain [OS=Homo sapiens]	Q13509	1	1992.92	16	FALSE
FALSE		High	Unambiguous	LDSELKNMQDMVEDYR	[R].LDSELKNMQDMVEDYR.[N]	1xOxidation [M]	1xOxidation [M8; M11]	0.0105829	0.0010893	0.733	1	1	6	KRT1	KRT1 [252-267]			Keratin, type II cytoskeletal 1 OS=Homo sapiens GN=KRT1 PE=1 SV=6	KRT1	1	2001.89	16	TRUE
FALSE		High	Unambiguous	LKEPMDVDVEDYYPAFLDMVR	[R].LKEPMDVDVEDYYPAFLDMVR.[S]	1xOxidation [M]	1xOxidation [M5; M19]	3.67379e-06	0.0010893	2.137	1	1	43	Q96ST3	Q96ST3 [947-967]			Paired amphipathic helix protein Sin3a [OS=Homo sapiens]	Q96ST3	1	2561.19	21	FALSE	0.231	-2.12	0.00220939	0.0221082	1.12771e+07	2.60247e+06	70.27	68.87	6	6	17063156	1.11305e+07	3.86331e+06	3.91019e+06	5.15545e+06	4.9207e+06	8901196	7028078	2.43983e+06	2.61392e+06	1.83078e+06	2.02062e+06	3.66048e+07	3.87731e+07	1.04555e+07	1.06941e+07
FALSE		High	Unambiguous	LYQSAGGMPGGMPGGFPGGGAPPSGGASSGPTIEEVD	[K].LYQSAGGMPGGMPGGFPGGGAPPSGGASSGPTIEEVD.[-]	1xOxidation [M]	1xOxidation [M8; M12]	1.48722e-08	0.0010893	3.107	1	1	28	P11142-1	P11142-1 [610-646]			Heat shock cognate 71 kDa protein [OS=Homo sapiens]	P11142-1	0	3362.49	37	FALSE	100	6.64				1.49265e+07		68.62		6							4.58584e+07	4.57852e+07	1.31147e+07	1.26183e+07	1.08144e+07	1.3674e+07
FALSE		High	Unambiguous	MLSGGFGYSPFLSITDGNMPGTRPASR	[R].MLSGGFGYSPFLSITDGNMPGTRPASR.[R]	1xOxidation [M]	1xOxidation [M1; M19]	0.00549367	0.0010893	0.849	1	1	3	Q15773	Q15773 [30-56]			Myeloid leukemia factor 2 [OS=Homo sapiens]	Q15773	0	2832.34	27	FALSE
FALSE		High	Unambiguous	MMVADVFSHR	[R].MMVADVFSHR.[F]	1xOxidation [M]	1xOxidation [M1; M2]	4.61089e-06	0.0010893	2.097	1	1	17	P51784	P51784 [540-549]			Ubiquitin carboxyl-terminal hydrolase 11 [OS=Homo sapiens]	P51784	0	1208.56	10	FALSE	7.237	2.86	4.60239e-06	0.000247762	1.46753e+06	1.06201e+07	36.63	35.57	6	6	1.30617e+06	760414	493669	511782	622418	718896	1.59924e+07	16181947	10237777	1.03738e+07	5.12881e+06	7.76156e+06	2.80207e+06	2.6489e+06	1.33604e+06	1.39969e+06
FALSE		High	Unambiguous	NLSNEEMIQAADELEEMKR	[R].NLSNEEMIQAADELEEMKR.[V]	1xOxidation [M]	1xOxidation [M7; M17]	0.00712571	0.0010893	0.803	1	2	22	Q15170	Q15170 [119-137]			transcription elongation factor A protein-like 1 [OS=Homo sapiens]	Q15170; Q15170-2	1	2266.03	19	FALSE	6.466	2.69	0.000556269	0.00748645	519929	3.36171e+06	66.32	47.54	6	6	282822	190388	100288	88367.1	566747	213529	5.22221e+06	3.90013e+06	1.76443e+06	1.09621e+06	2.61521e+06	2.99437e+06	606725	663216	271416	241679
FALSE		High	Unambiguous	SDLEMQYETLQEELMALKK	[K].SDLEMQYETLQEELMALKK.[N]	1xOxidation [M]	1xOxidation [M5; M15]	0.0372022	0.00194901	0.51	1	1	5	KRT9	KRT9 [272-290]			Keratin, type I cytoskeletal 9 OS=Homo sapiens GN=KRT9 PE=1 SV=3	KRT9	1	2315.11	19	TRUE	0.01	-6.64			2.65803e+06		8.98		6		1.12773e+06	848999	1050835	912114	1.05714e+06	1.35732e+06							2.41926e+06	2.95749e+06	2.84393e+06	2.49458e+06
FALSE		High	Unambiguous	VVDLMAHMASKE	[R].VVDLMAHMASKE.[-]	1xOxidation [M]	1xOxidation [M5; M8]	0.126074	0.00860454	0.286	1	2	4	P04406-1	P04406-1 [324-335]			glyceraldehyde-3-phosphate dehydrogenase [OS=Homo sapiens]	P04406-2; P04406-1	1	1346.64	12	FALSE	0.01	-6.64			253103		9.96		2		109950	77966.3											235870	271596
FALSE		High	Unambiguous	DSDSGLEQMSIGHHIR	[R].DSDSGLEQMSIGHHIR.[D]	1xOxidation [M9]	1xOxidation [M9]	0.00289805	0.0010893	0.962	1	1	5	Q15773	Q15773 [143-158]			Myeloid leukemia factor 2 [OS=Homo sapiens]	Q15773	0	1797.82	16	FALSE	0.643	-0.64	0.699004	0.839325	285231	183448	75.48	77.67	3	3	132959	95679.5	11013.1				181067	213593				14231	285231	333300	29805.5
FALSE		High	Unambiguous	EAEDNIREMLMAR	[K].EAEDNIREMLMAR.[R]	1xOxidation [M9]	1xOxidation [M9]	0.00359376	0.0010893	0.924	1	1	6	O60925	O60925 [107-119]			prefoldin subunit 1 [OS=Homo sapiens]	O60925	1	1593.74	13	FALSE	0.857	-0.22	0.65095	0.798707	329171	282229	103.49	93.93	6	6	1.04646e+06	539281	150347	97000.5	115446	126242	1.29689e+06	1.38793e+06	261767	286531	135427	224887	2.24492e+06	1.87859e+06	406893	265290
FALSE		High	Unambiguous	GTGSHPWTMAPPPGSTPSR	[R].GTGSHPWTMAPPPGSTPSR.[T]	1xOxidation [M9]	1xOxidation [M9]	0.0748143	0.00434873	0.384	1	1	1	O43347	O43347 [285-303]			RNA-binding protein Musashi homolog 1 [OS=Homo sapiens]	O43347	0	1936.9	19	FALSE
FALSE		High	Unambiguous	LETHMTPEMFR	[R].LETHMTPEMFR.[T]	1xOxidation [M9]	1xOxidation [M9]	0.0958789	0.0064943	0.338	1	1	2	Q08211	Q08211 [785-795]			Atp-dependent rna helicase a [OS=Homo sapiens]	Q08211	0	1407.64	11	FALSE
FALSE		High	Unambiguous	IIEVVDAIMTTAQSHQR	[R].IIEVVDAIMTTAQSHQR.[T]	1xOxidation [M9]	1xOxidation [M9]	0.00498997	0.0010893	0.866	1	2	12	Q01813	Q01813 [194-210]			ATP-dependent 6-phosphofructokinase, platelet type [OS=Homo sapiens]	Q01813; Q01813-2	0	1927.99	17	FALSE	0.01	-6.64			195734		81.4		4		243429	123296	30284.8		38671.1								522217	429500	81961.4
FALSE		High	Unambiguous	LLRDYQELMNTK	[R].LLRDYQELMNTK.[L]	1xOxidation [M9]	1xOxidation [M9]	1.74182e-05	0.0010893	1.863	1	2	38	KRT1	KRT1 [461-472]			Keratin, type II cytoskeletal 1 OS=Homo sapiens GN=KRT1 PE=1 SV=6	Krt2; KRT1	1	1539.78	12	TRUE	0.5	-1	0.321669	0.54973	1.61446e+06	807427	78.3	75.22	6	6	1.72156e+06	1.23465e+06	201283	182687	700258	773343	2.0127e+06	2.30947e+06	382454	408438	574823	785896	3.69319e+06	4.30091e+06	544742	499637
FALSE		High	Unambiguous	STSTPNVHMVSTTLPVDSR	[R].STSTPNVHMVSTTLPVDSR.[M]	1xOxidation [M9]	1xOxidation [M9]	0.00261717	0.0010893	0.98	1	2	9	P04049	P04049 [257-275]			RAF proto-oncogene serine/threonine-protein kinase [OS=Homo sapiens]	P04049; P04049-2	0	2045	19	FALSE	0.01	-6.64			67816.6		88.24		5		147031	96974		16425.9	28509.7	32500.9							315419	337809		44923.7
FALSE		High	Unambiguous	ISEQFSAMFRR	[R].ISEQFSAMFRR.[K]	1xOxidation [M8]; 1xMethyl [R10(99.6)]	1xOxidation [M8]; 1xMethyl [R10(99.6); R11(0.4)]	0.0856652	0.00584769	0.359	1	1	17	Q9BUF5	Q9BUF5 [381-391]	Q9BUF5 1xMethyl [R390(99.6); R391(0.4)]	Q9BUF5 1xMethyl [R390(99.6)]	Tubulin beta-6 chain [OS=Homo sapiens]	Q9BUF5	1	1401.69	11	FALSE	100	6.64				165176		117.1		3							1.12125e+06				119802	141190
FALSE		High	Unambiguous	AKFEELNMDLFR	[R].AKFEELNMDLFR.[S]	1xOxidation [M8]	1xOxidation [M8]	0.000357464	0.0010893	1.331	1	1	15	P11021	P11021 [325-336]			78 kDa glucose-regulated protein [OS=Homo sapiens]	P11021	1	1528.75	12	FALSE	1.069	0.1	0.984789	0.984789	1.38025e+06	1.4753e+06	64.1	0.54	6	2	1.27367e+06	1.00433e+06	404196	380607	227864	834639	1.4617e+06	1.40665e+06					2.73233e+06	3.49858e+06	1.0939e+06	1.04094e+06
FALSE		High	Unambiguous	ERVEAVNMAEGIIHDTETK	[K].ERVEAVNMAEGIIHDTETK.[M]	1xOxidation [M8]	1xOxidation [M8]	0.00608239	0.0010893	0.831	1	1	5	P38646	P38646 [577-595]			Stress-70 protein, mitochondrial [OS=Homo sapiens]	P38646	1	2158.04	19	FALSE
FALSE		High	Unambiguous	GQHSNVDMLVR	[R].GQHSNVDMLVR.[D]	1xOxidation [M8]	1xOxidation [M8]	0.00950595	0.0010893	0.752	1	1	2	Q9NVE7	Q9NVE7 [245-255]			pantothenate kinase 4 [OS=Homo sapiens]	Q9NVE7	0	1271.62	11	FALSE
FALSE		High	Unambiguous	LDHKFDLMYAK	[R].LDHKFDLMYAK.[R]	1xOxidation [M8]	1xOxidation [M8]	0.000284837	0.0010893	1.371	3	12	9	Q13748-1; P68363; Q9BQE3	Q13748-1 [391-401]; P68363 [391-401]; Q9BQE3 [391-401]			tubulin alpha-3C/D chain [OS=Homo sapiens] Tubulin alpha-1B chain [OS=Homo sapiens] Tubulin alpha-1C chain [OS=Homo sapiens]	Q13748-1; A6NHL2-1; Q71U36; A6NHL2-2; Q9NY65; P68366-2; P68363; Q71U36-2; Q9BQE3; P68363-2; Q9NY65-2; P68366	1	1396.69	11	FALSE	0.283	-1.82	0.770432	0.873515	933214	263820	63.31	91.15	3	5	435014	285186			82801.6		1.20744e+06	1.36456e+06	248422		129774	219039	933214	993444
FALSE		High	Unambiguous	LHISPSNMTNQNTNEYLEK	[K].LHISPSNMTNQNTNEYLEK.[I]	1xOxidation [M8]	1xOxidation [M8]	9.90433e-05	0.0010893	1.557	1	1	2	Q13547	Q13547 [343-361]			histone deacetylase 1 [OS=Homo sapiens]	Q13547	0	2249.05	19	FALSE
FALSE		High	Unambiguous	ISEQFTAMFRR	[R].ISEQFTAMFRR.[K]	1xOxidation [M8]	1xOxidation [M8]	0.0176874	0.0010893	0.642	4	7	38	Q13509; P04350; P07437; Q9BVA1	Q13509 [381-391]; P04350 [381-391]; P07437 [381-391]; Q9BVA1 [381-391]			tubulin beta-3 chain [OS=Homo sapiens] Tubulin beta-4A chain [OS=Homo sapiens] tubulin beta chain [OS=Homo sapiens] Tubulin beta-2B chain [OS=Homo sapiens]	Q13885; Q13509; P04350; Q13509-2; P07437; P68371; Q9BVA1	1	1401.69	11	FALSE	0.616	-0.7	0.960889	0.972938	939794	578449	126.34	111.94	2	5		1.13662e+06		81562			4396689	4205215		94327.3	350850	494447		3.95941e+06		223067
FALSE		High	Unambiguous	RLFSGATMASSR	[R].RLFSGATMASSR.[G]	1xOxidation [M8]	1xOxidation [M8]	0.0423226	0.00272876	0.487	1	2	1	Q9UBX3	Q9UBX3 [159-170]			Mitochondrial dicarboxylate carrier [OS=Homo sapiens]	Q9UBX3-2; Q9UBX3	1	1299.65	12	FALSE	100	6.64				97874.5		25.54		2							80481.7	112441
FALSE		High	Unambiguous	RQWLQEAMSAAFR	[R].RQWLQEAMSAAFR.[G]	1xOxidation [M8]	1xOxidation [M8]	1.8753e-05	0.0010893	1.85	1	3	11	Q9NZL4-1	Q9NZL4-1 [75-87]			Hsp70-binding protein 1 [OS=Homo sapiens]	Q9NZL4-3; Q9NZL4-1; Q9NZL4-2	1	1609.79	13	FALSE
FALSE		High	Unambiguous	SFNLPMLMLGGGGYTIR	[K].SFNLPMLMLGGGGYTIR.[N]	1xOxidation [M8]	1xOxidation [M8]	0.00125272	0.0010893	1.11	1	1	2	Q13547	Q13547 [290-306]			histone deacetylase 1 [OS=Homo sapiens]	Q13547	0	1842.92	17	FALSE
FALSE		High	Unambiguous	TFNLPLLMLGGGGYTIR	[K].TFNLPLLMLGGGGYTIR.[N]	1xOxidation [M8]	1xOxidation [M8]	7.31194e-09	0.0010893	3.232	1	2	2	Q92769	Q92769 [291-307]			Histone deacetylase 2 [OS=Homo sapiens]	Q92769; Q92769-3	0	1838.98	17	FALSE	0.01	-6.64			313091		63.78		4		290417	150584	56387.4	68328.2									623018	524559	152604	186874
FALSE		High	Unambiguous	TLITFAGMIPYR	[R].TLITFAGMIPYR.[T]	1xOxidation [M8]	1xOxidation [M8]	0.000210808	0.0010893	1.424	1	2	6	Q8N1F7-1	Q8N1F7-1 [791-802]			Nuclear pore complex protein Nup93 [OS=Homo sapiens]	Q8N1F7-2; Q8N1F7-1	0	1398.74	12	FALSE	0.01	-6.64			291729		18.09		2		154657	73636.8											331778	256514
FALSE		High	Unambiguous	VHIGQVIMSIR	[R].VHIGQVIMSIR.[T]	1xOxidation [M8]	1xOxidation [M8]	0.0537866	0.00272876	0.444	1	2	4	P27635	P27635 [129-139]			60S ribosomal protein L10 [OS=Homo sapiens]	P27635; Q96L21	0	1268.71	11	FALSE
FALSE		High	Unambiguous	FDDVWPMDPHPR	[R].FDDVWPMDPHPR.[T]	1xOxidation [M7]	1xOxidation [M7]	0.00643623	0.0010893	0.821	1	4	5	O00165	O00165 [169-180]			HCLS1-associated protein X-1 [OS=Homo sapiens]	O00165-3; O00165; O00165-5; O00165-2	0	1527.67	12	FALSE	0.01	-6.64			131705		101.33		6		418276	238401	48602.4	48118.4	54143.3	63169.2							897307	830469	131535	131601
FALSE		High	Unambiguous	GRPFRGMSEEEVFTEVANLFR	[R].GRPFRGMSEEEVFTEVANLFR.[G]	1xOxidation [M7]	1xOxidation [M7]	0.0208298	0.00194901	0.613	1	3	1	O75182-1	O75182-1 [202-222]			paired amphipathic helix protein sin3b [OS=Homo sapiens]	O75182-2; O75182-3; O75182-1	1	2487.21	21	FALSE
FALSE		High	Unambiguous	IQIVSQMVELVENR	[K].IQIVSQMVELVENR.[T]	1xOxidation [M7]	1xOxidation [M7]	8.06297e-07	0.0010893	2.404	1	5	12	Q9UK53-1	Q9UK53-1 [232-245]			inhibitor of growth protein 1 [OS=Homo sapiens]	Q9UK53-2; Q9UK53-5; Q9UK53-3; Q9UK53-4; Q9UK53-1	0	1673.89	14	FALSE	0.01	-6.64			169323		98.65		6		344288	221590	71494.6	54178.3	30371.3	39266.1							738585	771908	193490	148174
FALSE		High	Unambiguous	IQIVTQMLELVENR	[K].IQIVTQMLELVENR.[A]	1xOxidation [M7]	1xOxidation [M7]	5.57387e-07	0.0010893	2.469	1	2	9	Q9H160	Q9H160 [101-114]			Inhibitor of growth protein 2 [OS=Homo sapiens]	Q9H160; Q9H160-2	0	1701.92	14	FALSE
FALSE		High	Unambiguous	RLEAGAMVLADR	[R].RLEAGAMVLADR.[G]	1xOxidation [M7]	1xOxidation [M7]	0.124125	0.00860454	0.289	1	2	3	P25205	P25205 [392-403]			DNA replication licensing factor mcm3 [OS=Homo sapiens]	P25205; P25205-2	1	1317.69	12	FALSE
FALSE		High	Unambiguous	SIRPDNMSEYSK	[R].SIRPDNMSEYSK.[Q]	1xOxidation [M7]	1xOxidation [M7]	0.074408	0.00434873	0.385	2	3	2	Q13547; Q92769	Q13547 [78-89]; Q92769 [79-90]			histone deacetylase 1 [OS=Homo sapiens] Histone deacetylase 2 [OS=Homo sapiens]	Q13547; Q92769; Q92769-3	0	1442.66	12	FALSE	0.01	-6.64			67570.5		148.5		4		139578	345585	5634.21			2177.54							299431	1.20384e+06	15248.2
FALSE		High	Unambiguous	SRNTDEMVELR	[R].SRNTDEMVELR.[I]	1xOxidation [M7]	1xOxidation [M7]	0.0266918	0.00194901	0.569	1	3	4	P61978	P61978 [36-46]			Heterogeneous nuclear ribonucleoprotein K [OS=Homo sapiens]	P61978-2; P61978; P61978-3	1	1365.64	11	FALSE	0.01	-6.64			15234.3		132.02		5		48304.5	63574.9	3243.12	5570.27	2262.49								103625	221463	8777.03	15234.3
FALSE		High	Unambiguous	VNILSDMHLR	[R].VNILSDMHLR.[S]	1xOxidation [M7]	1xOxidation [M7]	0.0772958	0.00514875	0.378	1	3	4	P51114-1	P51114-1 [181-190]			Fragile X mental retardation syndrome-related protein 1 [OS=Homo sapiens]	P51114-1; P51114-2; P51114-3	0	1213.64	10	FALSE
FALSE		High	Unambiguous	EEKKAMLQEIANQK	[K].EEKKAMLQEIANQK.[G]	1xOxidation [M6]; 1xAcetyl [K]	1xOxidation [M6]; 1xAcetyl [K3(50); K4(50); K14(0)]	0.0724072	0.00434873	0.39	1	3	2	Q9H0E3	Q9H0E3 [924-937]			Histone deacetylase complex subunit SAP130 [OS=Homo sapiens]	Q9H0E3; Q9H0E3-2; Q9H0E3-3	2	1717.88	14	FALSE
FALSE		High	Unambiguous	DLEHLMLLIGELYK	[R].DLEHLMLLIGELYK.[K]	1xOxidation [M6]	1xOxidation [M6]	0.0460245	0.00272876	0.472	1	1	2	Q92621	Q92621 [438-451]			Nuclear pore complex protein Nup205 [OS=Homo sapiens]	Q92621	0	1702.91	14	FALSE	0.01	-6.64			30974.6		70.68		4		25685.8	21501			7086.56	8344.51							55102.5	74898.7
FALSE		High	Unambiguous	EILLEMIHSIQNSQDMR	[K].EILLEMIHSIQNSQDMR.[Q]	1xOxidation [M6]	1xOxidation [M6; M16]	0.010464	0.0010893	0.735	1	2	13	O95816	O95816 [54-70]			BAG family molecular chaperone regulator 2 [OS=Homo sapiens]	O95816-2; O95816	0	2073.01	17	FALSE	0.01	-6.64			102078		44.81		6		77289.8	24785.7	53173.9	44126.5	21317.2	28837.3							165806	86341.1	143907	120683
FALSE		High	Unambiguous	EIYENMAPGENKR	[K].EIYENMAPGENKR.[F]	1xOxidation [M6]	1xOxidation [M6]	0.128049	0.00860454	0.283	1	1	1	Q13200	Q13200 [108-120]			26S proteasome non-ATPase regulatory subunit 2 [OS=Homo sapiens]	Q13200	1	1566.72	13	FALSE
FALSE		High	Unambiguous	EQQHVMEELFQSSFR	[R].EQQHVMEELFQSSFR.[R]	1xOxidation [M6]	1xOxidation [M6]	0.00061995	0.0010893	1.234	1	2	4	P78527	P78527 [1769-1783]			DNA-dependent protein kinase catalytic subunit [OS=Homo sapiens]	P78527-2; P78527	0	1910.87	15	FALSE
FALSE		High	Unambiguous	KLAVNMVPFPR	[R].KLAVNMVPFPR.[L]	1xOxidation [M6]	1xOxidation [M6]	0.00315497	0.0010893	0.947	6	12	9	Q13509; P04350; Q9BUF5; Q3ZCM7; P07437; Q9BVA1	Q13509 [252-262]; P04350 [252-262]; Q9BUF5 [252-262]; Q3ZCM7 [252-262]; P07437 [252-262]; Q9BVA1 [252-262]			tubulin beta-3 chain [OS=Homo sapiens] Tubulin beta-4A chain [OS=Homo sapiens] Tubulin beta-6 chain [OS=Homo sapiens] tubulin beta-8 chain [OS=Homo sapiens] tubulin beta chain [OS=Homo sapiens] Tubulin beta-2B chain [OS=Homo sapiens]	Q13885; Q13509; Q9H4B7; P04350; A6NNZ2; Q9BUF5; Q13509-2; Q3ZCM7; TUBB1; P07437; P68371; Q9BVA1	1	1287.72	11	TRUE	5.97	2.58	0.0188836	0.0958991	212288	1.2674e+06	102.35	101.84	6	6	689470	344511	69316.1	70156.2	101740	92031	6.53175e+06	6.83793e+06	1.12875e+06	1.34003e+06	622673	691911	1.47909e+06	1.2001e+06	187594	191873
FALSE		High	Unambiguous	KLDLWMLPEILIIHLKR	[K].KLDLWMLPEILIIHLKR.[F]	1xOxidation [M6]	1xOxidation [M6]	0.028398	0.00194901	0.558	1	1	2	P51784	P51784 [814-830]			Ubiquitin carboxyl-terminal hydrolase 11 [OS=Homo sapiens]	P51784	2	2147.28	17	FALSE	100	6.64				909168		71.33		4							1.36785e+06	2.3062e+06			428255	509836
FALSE		High	Unambiguous	KTEVLMENFR	[K].KTEVLMENFR.[R]	1xOxidation [M6]	1xOxidation [M6]	0.0420864	0.00272876	0.488	1	2	3	Q9Y265	Q9Y265 [108-117]			RuvB-like 1 [OS=Homo sapiens]	Q9Y265; Q9Y265-2	1	1282.65	10	FALSE	0.01	-6.64			74525.7		79.21		6		92100.6	69495.9	30938.5	24253.9	16207.3	17509.2							197579	242089	83730.6	66332.8
FALSE		High	Unambiguous	NHEEEMKDLR	[K].NHEEEMKDLR.[N]	1xOxidation [M6]	1xOxidation [M6]	0.06931	0.00434873	0.398	1	1	7	KRT10	KRT10 [286-295]			Keratin, type I cytoskeletal 10 OS=Homo sapiens GN=KRT10 PE=1 SV=6	KRT10	1	1316.59	10	TRUE	0.01	-6.64			402111		86.06		6		116609	405545	477054	236339	76335.4	82871.6							250155	1.41272e+06	1.29108e+06	646372
FALSE		High	Unambiguous	TTGIVMDSGDGVTHTVPIYEGYALPHAILR	[R].TTGIVMDSGDGVTHTVPIYEGYALPHAILR.[L]	1xOxidation [M6]	1xOxidation [M6]	5.59312e-06	0.0010893	2.063	1	2	13	ACTB	ACTB [148-177]			Actin, cytoplasmic 1 OS=Bos taurus GN=ACTB PE=1 SV=1	ACTB; P63261	0	3199.61	30	TRUE	100	6.64				1.95927e+06		52.85		3							1.93384e+06	2077024	588952
FALSE		High	Unambiguous	VEAVNMAEGIIHDTETK	[R].VEAVNMAEGIIHDTETK.[M]	1xOxidation [M6]	1xOxidation [M6]	2.44067e-06	0.0010893	2.209	1	1	25	P38646	P38646 [579-595]			Stress-70 protein, mitochondrial [OS=Homo sapiens]	P38646	0	1872.9	17	FALSE	0.928	-0.11	0.754416	0.873252	2.14107e+06	1.98728e+06	62.98	62.5	6	5	1.77043e+06	980782	773145	801067	278386	293523	3.78526e+06	3.93016e+06	1.39765e+06	1.98728e+06		546544	3.79801e+06	3.41655e+06	2.09241e+06	2.19087e+06
FALSE		High	Unambiguous	VLSQPMPPTAGEAEQAADQQER	[R].VLSQPMPPTAGEAEQAADQQER.[E]	1xOxidation [M6]	1xOxidation [M6]	0.00026307	0.0010893	1.385	1	3	3	Q9NZL4-1	Q9NZL4-1 [102-123]			Hsp70-binding protein 1 [OS=Homo sapiens]	Q9NZL4-3; Q9NZL4-1; Q9NZL4-2	0	2369.1	22	FALSE
FALSE		High	Unambiguous	ADLEMQIESLKEELAYLK	[R].ADLEMQIESLKEELAYLK.[K]	1xOxidation [M5]	1xOxidation [M5]	0.0128953	0.0010893	0.698	1	1	1	KRT14	KRT14 [233-250]			Keratin, type I cytoskeletal 14 OS=Homo sapiens GN=KRT14 PE=1 SV=4	KRT14	1	2139.09	18	TRUE	0.01	-6.64			407589		28.08		6		168732	131751	199194	176468	130447	120763							361972	458955	539091	482630
FALSE		High	Unambiguous	ADLEMQIESLTEELAYLK	[K].ADLEMQIESLTEELAYLK.[K]	1xOxidation [M5]	1xOxidation [M5]	6.29402e-08	0.0010893	2.853	1	1	2	KRT10	KRT10 [267-284]			Keratin, type I cytoskeletal 10 OS=Homo sapiens GN=KRT10 PE=1 SV=6	KRT10	0	2112.04	18	TRUE	100	6.64				1.2674e+06		20.43		5							1.21846e+06	1.21302e+06	1.48787e+06	1.71552e+06	831364
FALSE		High	Unambiguous	ADLEMQIESLTEELAYLKK	[K].ADLEMQIESLTEELAYLKK.[N]	1xOxidation [M5]	1xOxidation [M5]	0.000531872	0.0010893	1.261	1	1	15	KRT10	KRT10 [267-285]			Keratin, type I cytoskeletal 10 OS=Homo sapiens GN=KRT10 PE=1 SV=6	KRT10	1	2240.14	19	TRUE	11.445	3.52	0.00268753	0.024802	745558	8.53321e+06	44.64	16.6	4	6	382289	61141.3			312495	369570	9612593	9361747	7.09193e+06	6531741	6179766	8164801	820106	212986
FALSE		High	Unambiguous	ALNSMGQDLERPLELR	[R].ALNSMGQDLERPLELR.[V]	1xOxidation [M5]	1xOxidation [M5]	0.0571665	0.00272876	0.433	1	1	4	Q02413	Q02413 [129-144]			Desmoglein-1 [OS=Homo sapiens]	Q02413	0	1857.95	16	FALSE	0.01	-6.64			367332		9.35		6		200507	97385.7	124584	132579	168636	178343							430139	339243	337170	362595
FALSE		High	Unambiguous	FFQGMPEKPTTTVR	[R].FFQGMPEKPTTTVR.[L]	1xOxidation [M5]	1xOxidation [M5]	0.00129608	0.0010893	1.104	1	1	8	P43246-1	P43246-1 [22-35]			DNA mismatch repair protein MSH2 [OS=Homo sapiens]	P43246-1	0	1654.83	14	FALSE	0.667	-0.58	0.464461	0.67577	219846	146563	115.52	123.42	6	6	785725	601623	81088.3	80527.7	74205.9	91814.6	1.21885e+06	1.40588e+06	66833.2	69474.4	95499.7	155862	1.68558e+06	2.09575e+06	219454	220238
FALSE		High	Unambiguous	LAVNMVPFPR	[K].LAVNMVPFPR.[L]	1xOxidation [M5]	1xOxidation [M5]	0.0233155	0.00194901	0.593	6	12	2	Q13509; P04350; Q9BUF5; Q3ZCM7; P07437; Q9BVA1	Q13509 [253-262]; P04350 [253-262]; Q9BUF5 [253-262]; Q3ZCM7 [253-262]; P07437 [253-262]; Q9BVA1 [253-262]			tubulin beta-3 chain [OS=Homo sapiens] Tubulin beta-4A chain [OS=Homo sapiens] Tubulin beta-6 chain [OS=Homo sapiens] tubulin beta-8 chain [OS=Homo sapiens] tubulin beta chain [OS=Homo sapiens] Tubulin beta-2B chain [OS=Homo sapiens]	Q13885; Q13509; Q9H4B7; P04350; A6NNZ2; Q9BUF5; Q13509-2; Q3ZCM7; TUBB1; P07437; P68371; Q9BVA1	0	1159.63	10	TRUE	100	6.64				154879		89.55		6							644680	321901	68828.6	92923.9	189951	87506.1
FALSE		High	Unambiguous	LFNYMYSTAPRPSLEPTR	[R].LFNYMYSTAPRPSLEPTR.[A]	1xOxidation [M5]	1xOxidation [M5]	0.0217907	0.00194901	0.605	1	2	2	Q15120-1	Q15120-1 [300-317]			[Pyruvate dehydrogenase (acetyl-transferring)] kinase isozyme 3, mitochondrial [OS=Homo sapiens]	Q15120-2; Q15120-1	0	2159.06	18	FALSE
FALSE		High	Unambiguous	LHFFMPGFAPLTAR	[R].LHFFMPGFAPLTAR.[G]	1xOxidation [M5]	1xOxidation [M5]	7.38795e-06	0.0010893	2.014	1	2	6	Q13509	Q13509 [263-276]			tubulin beta-3 chain [OS=Homo sapiens]	Q13509; Q13509-2	0	1620.84	14	FALSE	100	6.64				458756		100.45		5							1.55144e+06	1519439	68994.8	458756		92662.3
FALSE		High	Unambiguous	LHFFMPGFAPLTSR	[R].LHFFMPGFAPLTSR.[G]	1xOxidation [M5]	1xOxidation [M5]	1.3096e-07	0.0010893	2.724	5	8	172	P04350; Q9BUF5; Q3ZCM7; P07437; Q9BVA1	P04350 [263-276]; Q9BUF5 [263-276]; Q3ZCM7 [263-276]; P07437 [263-276]; Q9BVA1 [263-276]			Tubulin beta-4A chain [OS=Homo sapiens] Tubulin beta-6 chain [OS=Homo sapiens] tubulin beta-8 chain [OS=Homo sapiens] tubulin beta chain [OS=Homo sapiens] Tubulin beta-2B chain [OS=Homo sapiens]	Q13885; P04350; A6NNZ2; Q9BUF5; Q3ZCM7; P07437; P68371; Q9BVA1	0	1636.83	14	FALSE	2.529	1.34	0.107587	0.275798	1.18797e+07	3.00411e+07	107.22	124.02	6	6	3.68225e+07	2.17352e+07	3.17751e+06	2.83743e+06	5397385	5.43251e+06	363739152	194407744	26934136	30073220	24327090	24456730	7.89937e+07	7.57146e+07	8.59948e+06	7.76019e+06
FALSE		High	Unambiguous	LHFLMTGYTPLTTDQSVASVR	[R].LHFLMTGYTPLTTDQSVASVR.[K]	1xOxidation [M5]	1xOxidation [M5]	9.14725e-05	0.0010893	1.571	1	2	4	P23258	P23258 [266-286]			tubulin gamma-1 chain [OS=Homo sapiens]	P23258; Q9NRH3	0	2353.19	21	FALSE
FALSE		High	Unambiguous	IKFEMEQNLR	[R].IKFEMEQNLR.[Q]	1xOxidation [M5]	1xOxidation [M5]	2.32705e-05	0.0010893	1.812	1	1	36	KRT9	KRT9 [241-250]			Keratin, type I cytoskeletal 9 OS=Homo sapiens GN=KRT9 PE=1 SV=3	KRT9	1	1323.67	10	TRUE	0.602	-0.73	0.0115821	0.0705855	6.51137e+06	3.92045e+06	29.43	37.38	6	6	4.21401e+06	2.9408e+06	2.42752e+06	2.35966e+06	2.27995e+06	2.42836e+06	4548007	5428309	3.79185e+06	3.81682e+06	1367819	2317342	9.04012e+06	1.02443e+07	6.56974e+06	6.45352e+06
FALSE		High	Unambiguous	LSGVMVPAPIQDLEALR	[R].LSGVMVPAPIQDLEALR.[A]	1xOxidation [M5]	1xOxidation [M5]	6.12522e-06	0.0010893	2.047	1	2	2	Q9UBB4-1	Q9UBB4-1 [11-27]			Ataxin-10 [OS=Homo sapiens]	Q9UBB4-2; Q9UBB4-1	0	1824.99	17	FALSE	0.01	-6.64			426313		11.12		2		215023	113104											461279	393998
FALSE		High	Unambiguous	NQVAMNPTNTVFDAK	[K].NQVAMNPTNTVFDAK.[R]	1xOxidation [M5]	1xOxidation [M5]	9.84823e-05	0.0010893	1.558	1	2	11	P11142-1	P11142-1 [57-71]			Heat shock cognate 71 kDa protein [OS=Homo sapiens]	P11142-1; P11142-2	0	1665.79	15	FALSE	0.455	-1.13	0.0848142	0.240307	873910	397928	109.74	88.52	6	6	2.35339e+06	517759	184545	177730	319772	496214	1.09862e+06	1.14996e+06	376803	395709	70945.6	96300.4	5.04862e+06	1.80361e+06	499445	486081
FALSE		High	Unambiguous	NQVAMNPTNTVFDAKR	[K].NQVAMNPTNTVFDAKR.[L]	1xOxidation [M5]	1xOxidation [M5]	0.00049968	0.0010893	1.272	1	2	31	P11142-1	P11142-1 [57-72]			Heat shock cognate 71 kDa protein [OS=Homo sapiens]	P11142-1; P11142-2	1	1821.89	16	FALSE	0.161	-2.63	0.459677	0.671909	1.48142e+07	2.38525e+06	129.99	115.3	6	4	52791614	17579774	348169	293973	6016738	7578253	38700908	42722600	87919.4	145102			1.13251e+08	6.12391e+07	942270	803997
FALSE		High	Unambiguous	QQTDMAVNWAGGLHHAK	[R].QQTDMAVNWAGGLHHAK.[K]	1xOxidation [M5]	1xOxidation [M5]	6.0083e-05	0.0010893	1.645	1	2	29	Q92769	Q92769 [128-144]			Histone deacetylase 2 [OS=Homo sapiens]	Q92769; Q92769-3	0	1879.89	17	FALSE	0.173	-2.53	0.117427	0.29036	989309	171537	85.32	134.13	6	6	1.46848e+06	984549	354775	372716	185945	236776	2.119e+06	2.39516e+06	158451	62822.2	56123.3	149472	3.15026e+06	3.42968e+06	960147	1.01936e+06
FALSE		High	Unambiguous	TLNDMRQEYEQLIAK	[K].TLNDMRQEYEQLIAK.[N]	1xOxidation [M5]	1xOxidation [M5]	2.54844e-05	0.0010893	1.796	1	1	25	KRT9	KRT9 [322-336]			Keratin, type I cytoskeletal 9 OS=Homo sapiens GN=KRT9 PE=1 SV=3	KRT9	1	1867.92	15	TRUE	0.01	-6.64			1.95108e+06		47.49		6		1.66928e+06	1.07813e+06	494212	462782	862132	917384							3.58102e+06	3.75567e+06	1.33751e+06	1.26568e+06
FALSE		High	Unambiguous	VVHIMDFQR	[R].VVHIMDFQR.[G]	1xOxidation [M5]	1xOxidation [M5]	0.00304958	0.0010893	0.953	1	2	1	P43243	P43243 [399-407]			Matrin-3 [OS=Homo sapiens]	P43243; P43243-2	0	1160.59	9	FALSE
FALSE		High	Unambiguous	YHFNMGLLMGEAR	[R].YHFNMGLLMGEAR.[A]	1xOxidation [M5]	1xOxidation [M5]	0.0903978	0.00584769	0.349	1	2	3	P47897	P47897 [142-154]			glutamine--tRNA ligase [OS=Homo sapiens]	P47897-2; P47897	0	1554.72	13	FALSE
FALSE		High	Unambiguous	ARYMPQNPHIIATK	[R].ARYMPQNPHIIATK.[T]	1xOxidation [M4]	1xOxidation [M4]	0.0760456	0.00434873	0.381	1	2	4	Q16576-1	Q16576-1 [129-142]			Histone-binding protein RBBP7 [OS=Homo sapiens]	Q16576-1; Q16576-2	1	1655.87	14	FALSE	0.01	-6.64			44489.3		110.69		4		146173	79225.4			2840.04	3437.09							313579	275982
FALSE		High	Unambiguous	ETSMVHELNR	[R].ETSMVHELNR.[Y]	1xOxidation [M4]	1xOxidation [M4]	0.054993	0.00272876	0.44	1	2	3	P61619	P61619 [406-415]			Protein transport protein Sec61 subunit alpha isoform 1 [OS=Homo sapiens]	P61619; P61619-3	0	1231.57	10	FALSE	0.01	-6.64			263707		90.53		5			129894	101097	96421.5	7427.17	10055.8								452484	273605	263707
FALSE		High	Unambiguous	HVGMAVAGLLADAR	[R].HVGMAVAGLLADAR.[S]	1xOxidation [M4]	1xOxidation [M4]	0.000136908	0.0010893	1.5	1	2	3	P25788-1	P25788-1 [73-86]			Proteasome subunit alpha type-3 [OS=Homo sapiens]	P25788-2; P25788-1	0	1396.74	14	FALSE	100	6.64				600809		64.26		3							645446	575033			96950.7
FALSE		High	Unambiguous	IAGMDPVVHSALQEER	[R].IAGMDPVVHSALQEER.[L]	1xOxidation [M4]	1xOxidation [M4]	0.00537077	0.0010893	0.853	1	1	4	Q9NVE7	Q9NVE7 [672-687]			pantothenate kinase 4 [OS=Homo sapiens]	Q9NVE7	0	1767.87	16	FALSE	0.01	-6.64			65331.6		90.21		6		108722	68539.6	22887.5	25195.1	11227.4	14665.7							233237	238758	61941.8	68907
FALSE		High	Unambiguous	INEMVHFDLPGQEER	[R].INEMVHFDLPGQEER.[E]	1xOxidation [M4]	1xOxidation [M4]	0.082489	0.00584769	0.366	1	3	7	Q9NVI7	Q9NVI7 [515-529]			ATPase family AAA domain-containing protein 3A [OS=Homo sapiens]	Q9NVI7-3; Q9NVI7-2; Q9NVI7	0	1829.85	15	FALSE	0.01	-6.64			124225		67.13		6		126908	73541.5	47612.6	43788.8	23582.8	20913.4							272249	256182	128857	119760
FALSE		High	Unambiguous	TFGMAEEYHR	[R].TFGMAEEYHR.[E]	1xOxidation [M4]	1xOxidation [M4]	0.071621	0.00434873	0.392	1	1	3	Q8N1F7-1	Q8N1F7-1 [121-130]			Nuclear pore complex protein Nup93 [OS=Homo sapiens]	Q8N1F7-1	0	1256.54	10	FALSE	0.01	-6.64			288708		125.68		3		134580	356250				5065.84							288708	1.241e+06
FALSE		High	Unambiguous	VLAMSGDPNYLHR	[K].VLAMSGDPNYLHR.[M]	1xOxidation [M4]	1xOxidation [M4]	0.0185037	0.0010893	0.634	1	1	2	P30153	P30153 [486-498]			serine/threonine-protein phosphatase 2A 65 kDa regulatory subunit A alpha isoform [OS=Homo sapiens]	P30153	0	1488.73	13	FALSE	0.01	-6.64			41887.3		103.84		3		76746.5		7156.89	15315.6									164641		19369.1	41887.3
FALSE		High	Unambiguous	EHMSSSSSLQSR	[R].EHMSSSSSLQSR.[E]	1xOxidation [M3]	1xOxidation [M3]	0.0178881	0.0010893	0.64	1	2	3	Q9H0E3	Q9H0E3 [78-89]			Histone deacetylase complex subunit SAP130 [OS=Homo sapiens]	Q9H0E3; Q9H0E3-3	0	1351.59	12	FALSE	0.01	-6.64			75293.3		144.02		6		33213.7	133601	29398.9	30019.8	4246.09	5129.31							71251.9	465400	79564	82102.4
FALSE		High	Unambiguous	IRMTHNLLLNYGLYR	[R].IRMTHNLLLNYGLYR.[K]	1xOxidation [M3]	1xOxidation [M3]	0.00109953	0.0010893	1.133	2	3	24	Q13547; Q92769	Q13547 [35-49]; Q92769 [36-50]			histone deacetylase 1 [OS=Homo sapiens] Histone deacetylase 2 [OS=Homo sapiens]	Q13547; Q92769; Q92769-3	1	1893.02	15	FALSE	100	6.64				637166		11.07		2							581451	659592
FALSE		High	Unambiguous	ISMAAYVSGELEHVTR	[R].ISMAAYVSGELEHVTR.[R]	1xOxidation [M3]	1xOxidation [M3]	0.0131156	0.0010893	0.695	1	2	3	P17858-1	P17858-1 [756-771]			ATP-dependent 6-phosphofructokinase, liver type [OS=Homo sapiens]	P17858-1; P17858-2	0	1778.87	16	FALSE
FALSE		High	Unambiguous	QIMHHFIPDLLFAQR	[K].QIMHHFIPDLLFAQR.[G]	1xOxidation [M3]	1xOxidation [M3]	0.000378346	0.0010893	1.321	1	1	36	Q96ST3	Q96ST3 [814-828]			Paired amphipathic helix protein Sin3a [OS=Homo sapiens]	Q96ST3	0	1881.98	15	FALSE	100	6.64				760946		117.01		6							5.46871e+06	5.65072e+06	397935	749852	253158	660065
FALSE		High	Unambiguous	SAMSVQSSLVMHPIYAYGSEEQR	[R].SAMSVQSSLVMHPIYAYGSEEQR.[Q]	1xOxidation [M3]	1xOxidation [M3]	0.0349727	0.00194901	0.521	1	2	1	Q92947-1	Q92947-1 [139-161]			Glutaryl-CoA dehydrogenase, mitochondrial [OS=Homo sapiens]	Q92947-1; Q92947-2	0	2586.2	23	FALSE
FALSE		High	Unambiguous	YMNSDTTSPELREHLAQKPVFLPR	[R].YMNSDTTSPELREHLAQKPVFLPR.[N]	1xOxidation [M2]; 1xPhospho [T/S/Y]	1xOxidation [M2]; 1xPhospho [Y1(0); S4(0); T6(33.3); T7(33.3); S8(33.3)]	0.0807231	0.00514875	0.37	1	1	2	Q96ST3	Q96ST3 [1105-1128]			Paired amphipathic helix protein Sin3a [OS=Homo sapiens]	Q96ST3	1	2925.4	24	FALSE	0.01	-6.64			546929		14.15		2		230594	173588											494682	604693
FALSE		High	Unambiguous	AMTKDNNLLGR	[R].AMTKDNNLLGR.[F]	1xOxidation [M2]	1xOxidation [M2]	0.00078679	0.0010893	1.192	3	4	19	P17066; P0DMV8; P34931	P17066 [450-460]; P0DMV8 [448-458]; P34931 [450-460]			Heat shock 70 kDa protein 6 [OS=Homo sapiens] heat shock 70 kDa protein 1A [OS=Homo sapiens] Heat shock 70 kDa protein 1-like [OS=Homo sapiens]	P17066; P0DMV8-2; P0DMV8; P34931	1	1248.64	11	FALSE	2.061	1.04	0.799167	0.890107	212957	438905	132.4	124.15	6	6	475093	692610	38948	85971.9	70665.4	92435.5	3.42049e+06	2.52704e+06	53884.5	73816.2	276627	482547	1.01919e+06	2.41271e+06	105407	235128
FALSE		High	Unambiguous	DMLGGNGISDEYHVIR	[R].DMLGGNGISDEYHVIR.[H]	1xOxidation [M2]	1xOxidation [M2]	0.000488463	0.0010893	1.276	1	2	7	Q92947-1	Q92947-1 [387-402]			Glutaryl-CoA dehydrogenase, mitochondrial [OS=Homo sapiens]	Q92947-1; Q92947-2	0	1791.83	16	FALSE	1.317	0.4	0.401782	0.620667	239783	315758	107.51	89.06	6	5	600068	358523	32476.8	34911.2	101856	117280	1.5534e+06	1.39806e+06		226765	217450	269904	1.2873e+06	1.24891e+06	87893.9	95480.1
FALSE		High	Unambiguous	EMAGDNKLLGQFTLIGIPPAPR	[R].EMAGDNKLLGQFTLIGIPPAPR.[G]	1xOxidation [M2]	1xOxidation [M2]	0.00273848	0.0010893	0.972	1	1	16	P38646	P38646 [492-513]			Stress-70 protein, mitochondrial [OS=Homo sapiens]	P38646	1	2354.25	22	FALSE	100	6.64				618352		123.65		3							4.50638e+06				372601	528556
FALSE		High	Unambiguous	EMDRETLIDVAR	[R].EMDRETLIDVAR.[T]	1xOxidation [M2]	1xOxidation [M2]	0.0310756	0.00194901	0.542	1	2	2	P40227-1	P40227-1 [142-153]			T-complex protein 1 subunit zeta [OS=Homo sapiens]	P40227-1; P40227-2	1	1463.72	12	FALSE
FALSE		High	Unambiguous	GMSEEEVFTEVANLFR	[R].GMSEEEVFTEVANLFR.[G]	1xOxidation [M2]	1xOxidation [M2]	0.00116369	0.0010893	1.123	1	3	3	O75182-1	O75182-1 [207-222]			paired amphipathic helix protein sin3b [OS=Homo sapiens]	O75182-2; O75182-3; O75182-1	0	1873.86	16	FALSE
FALSE		High	Unambiguous	GMTYDALHVFDWIK	[R].GMTYDALHVFDWIK.[A]	1xOxidation [M2]	1xOxidation [M2]	0.132765	0.00860454	0.276	1	3	3	Q8N2K0	Q8N2K0 [219-232]			Monoacylglycerol lipase ABHD12 [OS=Homo sapiens]	Q8N2K0-2; Q8N2K0; Q8N2K0-3	0	1711.81	14	FALSE	0.01	-6.64			81186.7		92.86		5		198583	122683	19507.7	25951.2		38908.5							426010	427368	52794.7	70974.8
FALSE		High	Unambiguous	IMDPNIVGSEHYDVAR	[R].IMDPNIVGSEHYDVAR.[G]	1xOxidation [M2]	1xOxidation [M2]	7.32083e-07	0.0010893	2.421	1	1	30	P06576	P06576 [407-422]			ATP synthase subunit beta, mitochondrial [OS=Homo sapiens]	P06576	0	1831.86	16	FALSE	1.068	0.09	0.887556	0.949274	1.32402e+06	1.41379e+06	94.15	89.21	6	6	3.41355e+06	2.05462e+06	465962	466762	528942	658123	5.7577e+06	6403522	1.34928e+06	1.39492e+06	768132	1.05424e+06	7.32293e+06	7.15725e+06	1.26106e+06	1.27657e+06
FALSE		High	Unambiguous	IMEGPAFNFLDAPAVR	[R].IMEGPAFNFLDAPAVR.[V]	1xOxidation [M2]	1xOxidation [M2]	0.0222876	0.00194901	0.601	1	3	1	P11177	P11177 [309-324]			Pyruvate dehydrogenase E1 component subunit beta, mitochondrial [OS=Homo sapiens]	P11177-2; P11177-3; P11177	0	1763.88	16	FALSE
FALSE		High	Unambiguous	IMEVIDAITTTAQSHQR	[R].IMEVIDAITTTAQSHQR.[T]	1xOxidation [M2]	1xOxidation [M2]	0.00197154	0.0010893	1.03	1	2	2	P17858-1	P17858-1 [185-201]			ATP-dependent 6-phosphofructokinase, liver type [OS=Homo sapiens]	P17858-1; P17858-2	0	1929.97	17	FALSE
FALSE		High	Unambiguous	NMGGPYGGGNYGPGGSGGSGGYGGR	[R].NMGGPYGGGNYGPGGSGGSGGYGGR.[S]	1xOxidation [M2]	1xOxidation [M2]	0.0389106	0.00194901	0.502	1	2	1	P22626	P22626 [326-350]			heterogeneous nuclear ribonucleoproteins A2/B1 [OS=Homo sapiens]	P22626-2; P22626	0	2205.9	25	FALSE
FALSE		High	Unambiguous	QMQVLHPAAR	[K].QMQVLHPAAR.[M]	1xOxidation [M2]	1xOxidation [M2]	0.0607477	0.00359603	0.422	1	1	1	P50991	P50991 [80-89]			T-complex protein 1 subunit delta [OS=Homo sapiens]	P50991	0	1166.61	10	FALSE
FALSE		High	Unambiguous	SMDELNHDFQALALEGR	[R].SMDELNHDFQALALEGR.[A]	1xOxidation [M2]	1xOxidation [M2]	0.0110097	0.0010893	0.726	1	4	1	Q14671-1	Q14671-1 [124-140]			Pumilio homolog 1 [OS=Homo sapiens]	Q14671-2; Q14671-1; Q14671-3; Q14671-4	0	1961.9	17	FALSE
FALSE		High	Unambiguous	VMLGETNPADSKPGTIR	[R].VMLGETNPADSKPGTIR.[G]	1xOxidation [M2]	1xOxidation [M2]	0.0556059	0.00272876	0.438	1	5	1	P15531	P15531 [89-105]			Nucleoside diphosphate kinase A [OS=Homo sapiens]	P22392-2; P15531; O60361; P22392; P15531-2	0	1801.91	17	FALSE	0.01	-6.64			107914		74.19		4		83864.7	63466.2	23917.2			13618.9							179911	221085	64728.4
FALSE		High	Unambiguous	VMQVSPDGQHLASGDR	[R].VMQVSPDGQHLASGDR.[S]	1xOxidation [M2]	1xOxidation [M2]	0.0316048	0.00194901	0.539	1	2	4	O43379-1	O43379-1 [497-512]			Wd repeat-containing protein 62 [OS=Homo sapiens]	O43379-4; O43379-1	0	1712.8	16	FALSE	0.01	-6.64			90480.4		38.73		2		31843.4	34403											68312	119843
FALSE		High	Unambiguous	WMIDSRDDFTEER	[R].WMIDSRDDFTEER.[L]	1xOxidation [M2]	1xOxidation [M2]	0.000106029	0.0010893	1.545	1	1	12	P21912	P21912 [218-230]			Succinate dehydrogenase [ubiquinone] iron-sulfur subunit, mitochondrial [OS=Homo sapiens]	P21912	1	1715.73	13	FALSE	0.01	-6.64			170408		157.35		5		625756		21575.8	7206.4	77456.2	81667.8							1.34241e+06		58391.7	19709.1
FALSE		High	Unambiguous	YMNSDTTSPELREHLAQKPVFLPR	[R].YMNSDTTSPELREHLAQKPVFLPR.[N]	1xOxidation [M2]	1xOxidation [M2]	0.100053	0.0064943	0.33	1	1	8	Q96ST3	Q96ST3 [1105-1128]			Paired amphipathic helix protein Sin3a [OS=Homo sapiens]	Q96ST3	1	2845.43	24	FALSE
FALSE		High	Unambiguous	YMPQNPHIIATK	[R].YMPQNPHIIATK.[T]	1xOxidation [M2]	1xOxidation [M2]	1.2041e-05	0.0010893	1.928	1	2	41	Q16576-1	Q16576-1 [131-142]			Histone-binding protein RBBP7 [OS=Homo sapiens]	Q16576-1; Q16576-2	0	1428.73	12	FALSE	0.944	-0.08	0.566091	0.722717	5.6442e+06	5.32993e+06	123.94	115.67	6	6	25095620	20817854	2.08814e+06	2.06117e+06	1.92029e+06	2.61382e+06	31584974	39788164	5.16569e+06	5.17843e+06	1.18212e+06	3.28787e+06	5.38364e+07	7.2519e+07	5.65124e+06	5.63718e+06
FALSE		High	Unambiguous	VLYDAEISQIHQSVTDTNVILSMDNSR	[K].VLYDAEISQIHQSVTDTNVILSMDNSR.[N]	1xOxidation [M23]	1xOxidation [M23]	1.63632e-05	0.0010893	1.874	1	1	11	KRT2	KRT2 [315-341]			Keratin, type II cytoskeletal 2 epidermal OS=Homo sapiens GN=KRT2 PE=1 SV=2	KRT2	0	3064.49	27	TRUE	100	6.64				2.29709e+06		13.08		4							2040141	1.9544e+06	2.45067e+06	2.55283e+06
FALSE		High	Unambiguous	TTSPEEVHAQPYIAIDWEPEMK	[R].TTSPEEVHAQPYIAIDWEPEMK.[K]	1xOxidation [M21]	1xOxidation [M21]	0.000393684	0.0010893	1.314	1	1	8	P51784	P51784 [731-752]			Ubiquitin carboxyl-terminal hydrolase 11 [OS=Homo sapiens]	P51784	0	2587.2	22	FALSE	100	6.64				1.58297e+06		3.65		2							1.52259e+06	1.5547e+06
FALSE		High	Unambiguous	MKEIAEAYLGGKVHSAVITVPAYFNDSQR	[K].MKEIAEAYLGGKVHSAVITVPAYFNDSQR.[Q]	1xOxidation [M1]; 1xGG [K]; 1xPhospho [Y/S/T]; 1xAcetyl [K2(100)]	1xOxidation [M1]; 1xGG [K2; K12]; 1xPhospho [Y8(50); S15(50); T19(0); Y23(0); S27(0)]; 1xAcetyl [K2(100); K12(0)]	0.0357678	0.00194901	0.517	1	1	8	P54652	P54652 [128-156]	P54652 1xAcetyl [K129(100); K139(0)]	P54652 1xAcetyl [K129(100)]	Heat shock-related 70 kDa protein 2 [OS=Homo sapiens]	P54652	2	3446.65	29	FALSE
FALSE		High	Unambiguous	MAATFIGNSTAIQELFKR	[K].MAATFIGNSTAIQELFKR.[I]	1xOxidation [M1]	1xOxidation [M1]	0.0310756	0.00194901	0.542	1	1	2	P04350	P04350 [363-380]			Tubulin beta-4A chain [OS=Homo sapiens]	P04350	1	2014.04	18	FALSE
FALSE		High	Unambiguous	MAEIGEHVAPSEAANSLEQAQAAAER	[R].MAEIGEHVAPSEAANSLEQAQAAAER.[L]	1xOxidation [M1]	1xOxidation [M1]	2.85502e-05	0.0010893	1.776	1	1	10	P27708	P27708 [522-547]			CAD protein [OS=Homo sapiens]	P27708	0	2696.26	26	FALSE	0.01	-6.64			296510		52.17		3		165176	85118.3		37933.6									354345	296510		103746
FALSE		High	Unambiguous	MAVTFIGNSTAIQELFK	[K].MAVTFIGNSTAIQELFK.[R]	1xOxidation [M1]	1xOxidation [M1]	0.0300433	0.00194901	0.548	1	1	1	P07437	P07437 [363-379]			tubulin beta chain [OS=Homo sapiens]	P07437	0	1885.97	17	FALSE
FALSE		High	Unambiguous	MAVTFIGNSTAIQELFKR	[K].MAVTFIGNSTAIQELFKR.[I]	1xOxidation [M1]	1xOxidation [M1]	0.0689317	0.00434873	0.399	1	1	2	P07437	P07437 [363-380]			tubulin beta chain [OS=Homo sapiens]	P07437	1	2042.07	18	FALSE
FALSE		High	Unambiguous	MDYEDDRLR	[R].MDYEDDRLR.[D]	1xOxidation [M1]	1xOxidation [M1]	0.0772958	0.00514875	0.378	1	1	2	P43243	P43243 [217-225]			Matrin-3 [OS=Homo sapiens]	P43243	1	1228.53	9	FALSE
FALSE		High	Unambiguous	MKEIAEAYLGYPVTNAVITVPAYFNDSQR	[K].MKEIAEAYLGYPVTNAVITVPAYFNDSQR.[Q]	1xOxidation [M1]	1xOxidation [M1]	1.71239e-05	0.0010893	1.866	1	1	12	P0DMV8	P0DMV8 [127-155]			heat shock 70 kDa protein 1A [OS=Homo sapiens]	P0DMV8	1	3276.62	29	FALSE	100	6.64				3.93225e+06		101.78		6							20640704	19839428	3880894	3.75175e+06	1.10012e+06	2803820
FALSE		High	Unambiguous	MKETAEAYLGK	[K].MKETAEAYLGK.[K]	1xOxidation [M1]	1xOxidation [M1]	0.0182962	0.0010893	0.636	1	1	6	P11021	P11021 [153-163]			78 kDa glucose-regulated protein [OS=Homo sapiens]	P11021	1	1256.62	11	FALSE	100	6.64				209585		106.46		4							748937	1.01895e+06			35714.8	49483
FALSE		High	Unambiguous	MKETAENYLGHTAK	[K].MKETAENYLGHTAK.[N]	1xOxidation [M1]	1xOxidation [M1]	0.0237131	0.00194901	0.59	1	1	1	P38646	P38646 [174-187]			Stress-70 protein, mitochondrial [OS=Homo sapiens]	P38646	1	1608.77	14	FALSE	100	6.64				165068				1								157986
FALSE		High	Unambiguous	MLSFQGLAELAHR	[R].MLSFQGLAELAHR.[E]	1xOxidation [M1]	1xOxidation [M1]	0.000922243	0.0010893	1.164	1	1	15	O15294	O15294 [18-30]			UDP-N-acetylglucosamine--peptide N-acetylglucosaminyltransferase 110 kDa subunit [OS=Homo sapiens]	O15294	0	1488.76	13	FALSE	1.006	0.01	0.851487	0.932307	492190	495385	87.2	99.72	6	6	1.01729e+06	631520	174941	145262	221823	202860	2457315	2.29079e+06	316451	213835	398473	426756	2.18234e+06	2.1999e+06	473451	397282
FALSE		High	Unambiguous	MLVTFDEELRPLPVSVR	[R].MLVTFDEELRPLPVSVR.[V]	1xOxidation [M1]	1xOxidation [M1]	0.00162599	0.0010893	1.064	1	3	2	Q13200	Q13200 [829-845]			26S proteasome non-ATPase regulatory subunit 2 [OS=Homo sapiens]	Q13200; Q13200-2; Q13200-3	0	2017.08	17	FALSE
FALSE		High	Unambiguous	MNDIVKEFEDR	[R].MNDIVKEFEDR.[G]	1xOxidation [M1]	1xOxidation [M1]	0.135527	0.00935831	0.272	1	2	1	P54136-1	P54136-1 [342-352]			arginine--tRNA ligase, cytoplasmic [OS=Homo sapiens]	P54136-1; P54136-2	1	1411.65	11	FALSE
FALSE		High	Unambiguous	MQEHSDQVPVGNIPR	[K].MQEHSDQVPVGNIPR.[S]	1xOxidation [M1]	1xOxidation [M1]	0.0568511	0.00272876	0.434	1	3	1	P33993-1	P33993-1 [237-251]			DNA replication licensing factor MCM7 [OS=Homo sapiens]	P33993-2; P33993-1; P33993-3	0	1722.82	15	FALSE
FALSE		High	Unambiguous	MRPGAYSTGYGGYEEYSGLSDGYGFTTDLFGR	[R].MRPGAYSTGYGGYEEYSGLSDGYGFTTDLFGR.[D]	1xOxidation [M1]	1xOxidation [M1]	3.38541e-05	0.0010893	1.746	1	1	1	P52597	P52597 [231-262]			Heterogeneous nuclear ribonucleoprotein F [OS=Homo sapiens]	P52597	0	3490.52	32	FALSE
FALSE		High	Unambiguous	MSATFIGNSTAIQELFKR	[K].MSATFIGNSTAIQELFKR.[I]	1xOxidation [M1]	1xOxidation [M1]	0.124772	0.00860454	0.288	1	3	9	Q9BVA1	Q9BVA1 [363-380]			Tubulin beta-2B chain [OS=Homo sapiens]	Q13885; P68371; Q9BVA1	1	2030.04	18	FALSE
FALSE		High	Unambiguous	MTHNLLLNYGLYR	[R].MTHNLLLNYGLYR.[K]	1xOxidation [M1]	1xOxidation [M1]	6.73111e-05	0.0010893	1.625	2	3	78	Q13547; Q92769	Q13547 [37-49]; Q92769 [38-50]			histone deacetylase 1 [OS=Homo sapiens] Histone deacetylase 2 [OS=Homo sapiens]	Q13547; Q92769; Q92769-3	0	1623.83	13	FALSE	1.08	0.11	0.949116	0.972272	3.3778e+06	3.64887e+06	92.45	91.64	6	6	8.27478e+06	3.92885e+06	1.24522e+06	1.2379e+06	1.17538e+06	1.22751e+06	14610340	15487329	3197102	3.92142e+06	1.70073e+06	2.01226e+06	1.77515e+07	1.36861e+07	3.37002e+06	3.38559e+06
FALSE		High	Unambiguous	MVNHFIAEFKR	[R].MVNHFIAEFKR.[K]	1xOxidation [M1]	1xOxidation [M1]	0.000240222	0.0010893	1.401	1	2	15	P11142-1	P11142-1 [237-247]			Heat shock cognate 71 kDa protein [OS=Homo sapiens]	P11142-1; P11142-2	1	1407.72	11	FALSE	0.01	-6.64			199168		116.09		6		593828	357073	22379.3	20625.6	91385.5	90185.9							1.27391e+06	1.24387e+06	60566.4	56409.8
FALSE		High	Unambiguous	MVQEAEKYKAEDEVQR	[R].MVQEAEKYKAEDEVQR.[E]	1xOxidation [M1]	1xOxidation [M1]	8.37129e-06	0.0010893	1.992	1	2	8	P0DMV8	P0DMV8 [518-533]			heat shock 70 kDa protein 1A [OS=Homo sapiens]	P0DMV8-2; P0DMV8	2	1968.93	16	FALSE	7.379	2.88	0.708748	0.845082	104409	770407	113.66	84.09	5	3	365682	263372	21213.6	14372.7		50037.8	760407	961923				28533.8	784481	917456	57411.6	39308.3
FALSE		High	Unambiguous	GMDEVYNLFYVNNNWYIFMR	[R].GMDEVYNLFYVNNNWYIFMR.[L]	1xOxidation [M19]	1xOxidation [M19]	0.00276968	0.0010893	0.97	1	1	4	Q96ST3	Q96ST3 [878-897]			Paired amphipathic helix protein Sin3a [OS=Homo sapiens]	Q96ST3	0	2604.17	20	FALSE	0.01	-6.64			263232		25.79		4		132835	100432	69113.1	88907.5									284965	349856	187045	243157
FALSE		High	Unambiguous	IINLGPVHPGPLSPEPQPMGVR	[R].IINLGPVHPGPLSPEPQPMGVR.[V]	1xOxidation [M19]	1xOxidation [M19]	0.0303836	0.00194901	0.546	1	2	1	Q86T03-1	Q86T03-1 [150-171]			Type 1 phosphatidylinositol 4,5-bisphosphate 4-phosphatase [OS=Homo sapiens]	Q86T03-1; Q86T03-2	0	2321.24	22	FALSE
FALSE		High	Unambiguous	LHLGIPEAVFVEDVDSFMK	[R].LHLGIPEAVFVEDVDSFMK.[Q]	1xOxidation [M18]	1xOxidation [M18]	7.20589e-05	0.0010893	1.613	1	1	10	P61758	P61758 [21-39]			Prefoldin subunit 3 [OS=Homo sapiens]	P61758	0	2162.08	19	FALSE	0.01	-6.64			400385		53.61		6		296835	203754	149114	145246	80704.6	80566							636785	709777	403556	397239
FALSE		High	Unambiguous	IITHPNFNGNTLDNDIMLIK	[K].IITHPNFNGNTLDNDIMLIK.[L]	1xOxidation [M17]	1xOxidation [M17]	9.11577e-06	0.0010893	1.977	1	1	31	P00761	P00761 [78-97]			Trypsin OS=Sus scrofa PE=1 SV=1	P00761	0	2299.18	20	TRUE	1.219	0.29	0.743906	0.870585	1.97276e+06	2.4053e+06	67.99	77.37	6	6	1.68136e+06	1.28326e+06	297741	231656	907002	891488	4.36859e+06	4.04894e+06	248410	325939	1.69233e+06	2.36891e+06	3.60695e+06	4.47025e+06	805792	633566
FALSE		High	Unambiguous	YLEEERPFAIEQVTGMLLAK	[R].YLEEERPFAIEQVTGMLLAK.[L]	1xOxidation [M16]	1xOxidation [M16]	3.8885e-06	0.0010893	2.127	1	1	11	O95757	O95757 [105-124]			Heat shock 70 kDa protein 4L [OS=Homo sapiens]	O95757	0	2353.21	20	FALSE
FALSE		High	Unambiguous	LVHQNSASDDAEASMISK	[R].LVHQNSASDDAEASMISK.[L]	1xOxidation [M15]	1xOxidation [M15]	1.74182e-05	0.0010893	1.863	1	1	15	Q13616	Q13616 [474-491]			Cullin-1 [OS=Homo sapiens]	Q13616	0	1918.88	18	FALSE	0.599	-0.74	0.666966	0.806854	237418	142329	89.54	60.31	6	5	162781	183133	87763.2	86772.2	11389.8	15835.6	140481	220244	73525.9		166832	28379.3	349206	637945	237519	237317
FALSE		High	Unambiguous	TIQGLEIELQSQLSMK	[R].TIQGLEIELQSQLSMK.[A]	1xOxidation [M15]	1xOxidation [M15]	0.122203	0.00860454	0.292	1	6	2	KRT19	KRT19 [302-317]			Keratin, type I cytoskeletal 19 OS=Homo sapiens GN=KRT19 PE=1 SV=4	KRT19; KRT15; P13646-3; P13646-2; P13646; Krt19	0	1833.96	16	TRUE
FALSE		High	Unambiguous	TVVSGLVNHVPLEQMQNR	[R].TVVSGLVNHVPLEQMQNR.[M]	1xOxidation [M15]	1xOxidation [M15]	0.00251542	0.0010893	0.987	1	2	3	Q12904-1	Q12904-1 [188-205]			aminoacyl tRNA synthase complex-interacting multifunctional protein 1 [OS=Homo sapiens]	Q12904-1; Q12904-2	0	2037.05	18	FALSE
FALSE		High	Unambiguous	TPARDYNNSYYGLMLFGHPLLVSVPR	[R].TPARDYNNSYYGLMLFGHPLLVSVPR.[D]	1xOxidation [M14]	1xOxidation [M14]	0.0115837	0.0010893	0.717	1	1	2	P51784	P51784 [598-623]			Ubiquitin carboxyl-terminal hydrolase 11 [OS=Homo sapiens]	P51784	1	2996.51	26	FALSE
FALSE		High	Unambiguous	DRFTWEGLYNVLMYR	[R].DRFTWEGLYNVLMYR.[L]	1xOxidation [M13]	1xOxidation [M13]	1.59406e-06	0.0010893	2.284	1	1	39	P51784	P51784 [624-638]			Ubiquitin carboxyl-terminal hydrolase 11 [OS=Homo sapiens]	P51784	1	1978.95	15	FALSE	0.899	-0.15	0.558333	0.715641	3.13393e+06	2.81843e+06	92.57	74.4	6	6	5.10751e+06	4977098	995915	959256	1.4207e+06	1.43633e+06	8868037	8714512	1.81232e+06	2.0963e+06	2.00377e+06	2.74701e+06	1.09569e+07	1.73377e+07	2.6953e+06	2.62351e+06
FALSE		High	Unambiguous	ESTGAQVQVAGDMLPNSTER	[R].ESTGAQVQVAGDMLPNSTER.[A]	1xOxidation [M13]	1xOxidation [M13]	1.35033e-08	0.0010893	3.124	1	14	5	Q15365	Q15365 [125-144]			Poly(RC)-binding protein 1 [OS=Homo sapiens]	Q15366-3; Q15366-7; P57721-5; P57721-2; P57721-1; Q15366-6; Q15366-4; Q15366-1; Q15365; Q15366-8; P57721-4; Q15366-5; P57721-3; Q15366-2	0	2105.98	20	FALSE	0.915	-0.13	0.494635	0.691932	521173	476812	70.13	13.5	3	2	254779	149612		26558.3			427639	502226					546565	521173		72635.3
FALSE		High	Unambiguous	LYSPSQIGAFVLMK	[K].LYSPSQIGAFVLMK.[M]	1xOxidation [M13]	1xOxidation [M13]	5.83298e-07	0.0010893	2.461	1	1	18	P38646	P38646 [160-173]			Stress-70 protein, mitochondrial [OS=Homo sapiens]	P38646	0	1569.83	14	FALSE	2.778	1.47	0.371904	0.597637	152623	423932	90.09	80.01	6	4	290593	203930	61628.8	51064.9	45274	54232.2	938031	897487	180469			129563	623395	710391	166789	139659
FALSE		High	Unambiguous	QISRPSAAGINLMIGSTR	[R].QISRPSAAGINLMIGSTR.[Y]	1xOxidation [M13]	1xOxidation [M13]	0.000149083	0.0010893	1.485	1	2	10	Q08211	Q08211 [1137-1154]			Atp-dependent rna helicase a [OS=Homo sapiens]	Q08211; Q08211-2	0	1888.01	18	FALSE
FALSE		High	Unambiguous	VEVERDNLAEDIMR	[R].VEVERDNLAEDIMR.[L]	1xOxidation [M13]	1xOxidation [M13]	1.97365e-05	0.0010893	1.841	1	1	10	P08670	P08670 [171-184]			Vimentin [OS=Homo sapiens]	P08670	1	1704.82	14	FALSE	1.893	0.92	0.811225	0.900431	502277	950848	95.58	80.38	4	3	751462	483280	57825.1	56689.9			938506	1.00541e+06	48787				1.61208e+06	1.68351e+06	156495	155044
FALSE		High	Unambiguous	VLIVSEDPELPYMRPPLSK	[R].VLIVSEDPELPYMRPPLSK.[E]	1xOxidation [M13]	1xOxidation [M13]	0.00435636	0.0010893	0.89	1	4	2	O95831-1	O95831-1 [159-177]			Apoptosis-inducing factor 1, mitochondrial [OS=Homo sapiens]	O95831-1; O95831-4; O95831-6; O95831-3	0	2199.17	19	FALSE	100	6.64				1.53442e+06		22.74		2							1.28774e+06	1.7272e+06
FALSE		High	Unambiguous	YDLIAVSNHYGGMR	[K].YDLIAVSNHYGGMR.[D]	1xOxidation [M13]	1xOxidation [M13]	0.000814034	0.0010893	1.186	1	1	28	P51784	P51784 [872-885]			Ubiquitin carboxyl-terminal hydrolase 11 [OS=Homo sapiens]	P51784	0	1611.76	14	FALSE	0.443	-1.17	0.164459	0.354134	1.2027e+06	532703	39.92	58.02	6	6	647605	427417	429433	455076	212859	276782	1.19468e+06	1.156e+06	309723	693037	313067	350000	1.38928e+06	1.48891e+06	1.1622e+06	1.2446e+06
FALSE		High	Unambiguous	TEEAAADGGGGMQNEPLTPGYHGFPAR	[R].TEEAAADGGGGMQNEPLTPGYHGFPAR.[D]	1xOxidation [M12]	1xOxidation [M12]	1.52325e-06	0.0010893	2.292	1	2	8	O43251-8	O43251-8 [50-76]			Isoform 8 of RNA binding protein fox-1 homolog 2 [OS=Homo sapiens]	O43251-6; O43251-8	0	2746.22	27	FALSE
FALSE		High	Unambiguous	TNLIVNYLPQNMTQDELR	[R].TNLIVNYLPQNMTQDELR.[S]	1xOxidation [M12]	1xOxidation [M12]	5.87334e-05	0.0010893	1.649	1	2	6	Q15717	Q15717 [20-37]			ELAV-like protein 1 [OS=Homo sapiens]	Q15717-2; Q15717	0	2178.09	18	FALSE	0.01	-6.64			106050		95.96		4		168694	95528.6	11473.3	12357.3									361892	332774	31051	33796.5
FALSE		High	Unambiguous	AFVHWYVGEGMEEGEFSEAR	[R].AFVHWYVGEGMEEGEFSEAR.[E]	1xOxidation [M11]	1xOxidation [M11]	1.09439e-08	0.0010893	3.161	3	10	175	Q13748-1; P68363; Q9BQE3	Q13748-1 [403-422]; P68363 [403-422]; Q9BQE3 [403-422]			tubulin alpha-3C/D chain [OS=Homo sapiens] Tubulin alpha-1B chain [OS=Homo sapiens] Tubulin alpha-1C chain [OS=Homo sapiens]	Q13748-1; Q71U36; Q9NY65; P68366-2; P68363; Q71U36-2; Q9BQE3; P68363-2; Q9NY65-2; P68366	0	2346.01	20	FALSE	0.01	-6.64			2.54655e+06		37.19		6		1.12306e+06	772693	1.25765e+06	1.08604e+06	566631	622277							2.40926e+06	2.69168e+06	3.40366e+06	2.97026e+06
FALSE		High	Unambiguous	AILVDLEPGTMDSVR	[R].AILVDLEPGTMDSVR.[S]	1xOxidation [M11]	1xOxidation [M11]	6.44648e-06	0.0010893	2.038	3	4	30	Q13509; P07437; Q9BVA1	Q13509 [63-77]; P07437 [63-77]; Q9BVA1 [63-77]			tubulin beta-3 chain [OS=Homo sapiens] tubulin beta chain [OS=Homo sapiens] Tubulin beta-2B chain [OS=Homo sapiens]	Q13885; Q13509; P07437; Q9BVA1	0	1631.83	15	FALSE	0.812	-0.3	0.770749	0.873515	2.87709e+06	2.33722e+06	110.12	119.79	6	6	7.02686e+06	2.05997e+06	330718	313915	1.16946e+06	1470605	19930062	10008380	1.26105e+06	1.43634e+06	1.67923e+06	2254148	1.50744e+07	7.17591e+06	895042	858539
FALSE		High	Unambiguous	ALTVPELTQQMFDAR	[R].ALTVPELTQQMFDAR.[N]	1xOxidation [M11]	1xOxidation [M11]	0.00141113	0.0010893	1.089	1	1	2	Q9BUF5	Q9BUF5 [283-297]			Tubulin beta-6 chain [OS=Homo sapiens]	Q9BUF5	0	1735.87	15	FALSE
FALSE		High	Unambiguous	AVLVDLEPGTMDSVR	[R].AVLVDLEPGTMDSVR.[S]	1xOxidation [M11]	1xOxidation [M11]	0.000216879	0.0010893	1.419	2	3	10	P04350; Q3ZCM7	P04350 [63-77]; Q3ZCM7 [63-77]			Tubulin beta-4A chain [OS=Homo sapiens] tubulin beta-8 chain [OS=Homo sapiens]	P04350; Q3ZCM7; P68371	0	1617.82	15	FALSE	1.031	0.04	0.934288	0.972272	690476	711661	111.39	118.57	6	6	1.91666e+06	618035	87883.4	105002	310402	319116	4.76643e+06	2.86593e+06	227609	111676	540695	649064	4.11171e+06	2.15292e+06	237844	287175
FALSE		High	Unambiguous	ETGVDLTKDNMALQR	[R].ETGVDLTKDNMALQR.[V]	1xOxidation [M11]	1xOxidation [M11]	8.6615e-06	0.0010893	1.986	1	1	19	P38646	P38646 [293-307]			Stress-70 protein, mitochondrial [OS=Homo sapiens]	P38646	1	1706.84	15	FALSE	0.01	-6.64			1.46501e+06		106.44		6		4.0277e+06	2.81238e+06	366632	365714	583409	764333							8.64044e+06	9.79692e+06	992237	1.00021e+06
FALSE		High	Unambiguous	EVAGHTEQLQMSR	[R].EVAGHTEQLQMSR.[S]	1xOxidation [M11]	1xOxidation [M11]	0.0269942	0.00194901	0.567	1	1	3	KRT19	KRT19 [281-293]			Keratin, type I cytoskeletal 19 OS=Homo sapiens GN=KRT19 PE=1 SV=4	KRT19	0	1501.71	13	TRUE	0.01	-6.64			479028				1			137514												479028
FALSE		High	Unambiguous	FTWEGLYNVLMYR	[R].FTWEGLYNVLMYR.[L]	1xOxidation [M11]	1xOxidation [M11]	0.000791266	0.0010893	1.191	1	1	5	P51784	P51784 [626-638]			Ubiquitin carboxyl-terminal hydrolase 11 [OS=Homo sapiens]	P51784	0	1707.82	13	FALSE	0.01	-6.64			77586.1		66.29		6		118213	51024.9	23200.7	30189.1	31607.3	30964.9							253596	177745	62789.5	82565.2
FALSE		High	Unambiguous	ILHGLGFTPAMQR	[R].ILHGLGFTPAMQR.[K]	1xOxidation [M11]	1xOxidation [M11]	0.0420864	0.00272876	0.488	1	2	6	Q9UG63	Q9UG63 [211-223]			ATP-binding cassette sub-family F member 2 [OS=Homo sapiens]	Q9UG63-2; Q9UG63	0	1456.77	13	FALSE	0.01	-6.64			143602		95.58		6		307892	201317	34515.1	32250.9	52508.1	81595.9							660506	701288	93410.1	88204.2
FALSE		High	Unambiguous	SPQNQYPAELMRR	[R].SPQNQYPAELMRR.[F]	1xOxidation [M11]	1xOxidation [M11]	0.114176	0.00860454	0.305	1	2	3	P33993-1	P33993-1 [121-133]			DNA replication licensing factor MCM7 [OS=Homo sapiens]	P33993-2; P33993-1	1	1605.78	13	FALSE	0.01	-6.64			814998		19.66		2		330300	269098											708576	937403
FALSE		High	Unambiguous	AFYPEEISSMVLTK	[K].AFYPEEISSMVLTK.[ML]	1xOxidation [M10]	1xOxidation [M10]	1.67766e-06	0.0010893	2.275	2	2	31	P0DMV8; P34931	P0DMV8 [113-126]; P34931 [115-128]			heat shock 70 kDa protein 1A [OS=Homo sapiens] Heat shock 70 kDa protein 1-like [OS=Homo sapiens]	P0DMV8; P34931	0	1630.8	14	FALSE	0.01	-6.64			1.00402e+06		92.34		6		2.37289e+06	1.57024e+06	371616	366486	417264	447231							5.09045e+06	5.46995e+06	1.00572e+06	1.00232e+06
FALSE		High	Unambiguous	DYNNSYYGLMLFGHPLLVSVPR	[R].DYNNSYYGLMLFGHPLLVSVPR.[D]	1xOxidation [M10]	1xOxidation [M10]	4.1392e-06	0.0010893	2.116	1	1	21	P51784	P51784 [602-623]			Ubiquitin carboxyl-terminal hydrolase 11 [OS=Homo sapiens]	P51784	0	2571.27	22	FALSE	0.824	-0.28	0.350176	0.583025	3.36426e+06	2.77237e+06	74.47	75.67	6	5	4.03076e+06	3689723	1.18834e+06	1.28679e+06	1.12969e+06	1.41111e+06	6.62057e+06	6663212		2.77237e+06	607324	1.51268e+06	8.647e+06	1.28532e+07	3.21607e+06	3.51928e+06
FALSE		High	Unambiguous	NALESYAFNMK	[K].NALESYAFNMK.[S]	1xOxidation [M10]	1xOxidation [M10]	0.000202592	0.0010893	1.431	2	3	16	P0DMV8; P34931	P0DMV8 [540-550]; P34931 [542-552]			heat shock 70 kDa protein 1A [OS=Homo sapiens] Heat shock 70 kDa protein 1-like [OS=Homo sapiens]	P0DMV8-2; P0DMV8; P34931	0	1303.6	11	FALSE	0.683	-0.55	0.777211	0.87776	1.59247e+06	1.08827e+06	124.44	130.99	6	6	4.56351e+06	986104	136150	157039	684340	769926	1.49739e+07	1.35709e+07	622381	607795	306170	1.53164e+06	9.78987e+06	3.43509e+06	368471	429491
FALSE		High	Unambiguous	NSLESYAFNMK	[K].NSLESYAFNMK.[A]	1xOxidation [M10]	1xOxidation [M10]	0.000943408	0.0010893	1.16	1	1	9	P11142-1	P11142-1 [540-550]			Heat shock cognate 71 kDa protein [OS=Homo sapiens]	P11142-1	0	1319.59	11	FALSE	0.01	-6.64			669156		130.79		6		2.11714e+06	438030	56419.1	46110.9	266652	348888							4.5418e+06	1.52588e+06	152690	126110
FALSE		High	Unambiguous	SELHIENLNMEADPGQYR	[R].SELHIENLNMEADPGQYR.[C]	1xOxidation [M10]	1xOxidation [M10]	0.0696902	0.00434873	0.397	1	4	4	P35613	P35613 [283-300]			Basigin [OS=Homo sapiens]	P35613-4; P35613-2; P35613-3; P35613	0	2131.97	18	FALSE	0.01	-6.64			133668				1			38371.7												133668
FALSE		High	Unambiguous	SFYPEEVSSMVLTK	[K].SFYPEEVSSMVLTK.[M]	1xOxidation [M10]	1xOxidation [M10]	2.1249e-05	0.0010893	1.828	1	2	16	P11142-1	P11142-1 [113-126]			Heat shock cognate 71 kDa protein [OS=Homo sapiens]	P11142-1; P11142-2	0	1632.78	14	FALSE	100	6.64				1.353e+06		0.91		2							1.32682e+06	1303357
FALSE		High	Unambiguous	TSQNSELNNMQDLVEDYKK	[R].TSQNSELNNMQDLVEDYKK.[K]	1xOxidation [M10]	1xOxidation [M10]	0.000343536	0.0010893	1.338	1	1	21	KRT2	KRT2 [248-266]			Keratin, type II cytoskeletal 2 epidermal OS=Homo sapiens GN=KRT2 PE=1 SV=2	KRT2	1	2272.04	19	TRUE	1.283	0.36	0.471587	0.676497	554271	711364	46.8	57.05	6	6	445730	378049	201363	182577	204971	270172	860278	896789	912100	68044.2	301498	496279	956203	1.31693e+06	544960	499336
FALSE		High	Unambiguous	VTVIPFYMGMR	[R].VTVIPFYMGMR.[E]	1xOxidation [M10]	1xOxidation [M10]	0.00345413	0.0010893	0.931	1	1	1	Q9Y2S7	Q9Y2S7 [243-253]			Polymerase delta-interacting protein 2 [OS=Homo sapiens]	Q9Y2S7	0	1329.67	11	FALSE
FALSE		High	Unambiguous	YHTSQSGDEMTSLSEYVSR	[R].YHTSQSGDEMTSLSEYVSR.[M]	1xOxidation [M10]	1xOxidation [M10]	0.000162341	0.0010893	1.47	1	1	17	P08238	P08238 [457-475]			Heat shock protein HSP 90-beta [OS=Homo sapiens]	P08238	0	2192.94	19	FALSE	2.308	1.21	0.957221	0.972272	181111	418081	100.75	67.25	5	3	466544	124889	66920.6		53341.7	57294.8	412654	462969				64684.4	1.00085e+06	435051	181111
FALSE		High	Unambiguous	SISISVARGGGR	[K].SISISVARGGGR.[G]	1xMethyl [R8(100)]	1xMethyl [R8(100); R12(0)]	0.0235798	0.00194901	0.591	1	1	5	KRT1	KRT1 [75-86]	KRT1 1xMethyl [R82(100); R86(0)]	KRT1 1xMethyl [R82(100)]	Keratin, type II cytoskeletal 1 OS=Homo sapiens GN=KRT1 PE=1 SV=6	KRT1	1	1173.67	12	TRUE	0.01	-6.64			435861		29.43		6		300397	198679	168335	152472	157414	173675							644427	692098	455574	417001
FALSE		High	Unambiguous	GQRVPLYLSK	[R].GQRVPLYLSK.[A]	1xMethyl [R3(100)]	1xMethyl [R3(100); K10(0)]	0.000101896	0.0010893	1.552	1	1	49	Q8TEE9	Q8TEE9 [92-101]	Q8TEE9 1xMethyl [R94(100); K101(0)]	Q8TEE9 1xMethyl [R94(100)]	Histone deacetylase complex subunit SAP25 [OS=Homo sapiens]	Q8TEE9	1	1174.69	10	FALSE	0.831	-0.27	0.102128	0.268189	1.38737e+07	1.1533e+07	26.35	25.18	6	6	9102397	5981440	4431281	4096766	6151952	6500482	13655322	14684439	11350634	11034433	5.69309e+06	8698321	1.95269e+07	2.08363e+07	1.19926e+07	1.12044e+07
FALSE		High	Unambiguous	FWEVISDEHGIDPTGSYHGDSDLQLER	[K].FWEVISDEHGIDPTGSYHGDSDLQLER.[I]	1xMethyl [R27(100)]	1xMethyl [R27(100)]	0.0266918	0.00194901	0.569	1	2	17	Q9BVA1	Q9BVA1 [20-46]	Q9BVA1 1xMethyl [R46(100)]	Q9BVA1 1xMethyl [R46(100)]	Tubulin beta-2B chain [OS=Homo sapiens]	Q13885; Q9BVA1	0	3116.42	27	FALSE
FALSE		High	Unambiguous	FWEVISDEHGIDPTGTYHGDSDLQLDR	[K].FWEVISDEHGIDPTGTYHGDSDLQLDR.[I]	1xMethyl [R27(100)]	1xMethyl [R27(100)]	1.24585e-05	0.0010893	1.922	1	1	29	P07437	P07437 [20-46]	P07437 1xMethyl [R46(100)]	P07437 1xMethyl [R46(100)]	tubulin beta chain [OS=Homo sapiens]	P07437	0	3116.42	27	FALSE
FALSE		High	Unambiguous	SRLEQEIATYR	[K].SRLEQEIATYR.[S]	1xMethyl [R2(100)]	1xMethyl [R2(100); R11(0)]	0.0457683	0.00272876	0.473	1	2	2	KRT19	KRT19 [371-381]	KRT19 1xMethyl [R372(100); R381(0)]	KRT19 1xMethyl [R372(100)]	Keratin, type I cytoskeletal 19 OS=Homo sapiens GN=KRT19 PE=1 SV=4	KRT19; Krt19	1	1379.73	11	TRUE
FALSE		High	Unambiguous	DNNLLGRFELSGIPPAPR	[K].DNNLLGRFELSGIPPAPR.[G]	1xMethyl [R18(100)]	1xMethyl [R7(0); R18(100)]	0.00103891	0.0010893	1.143	2	3	20	P17066; P0DMV8	P17066 [454-471]; P0DMV8 [452-469]	P17066 1xMethyl [R460(0); R471(100)]; P0DMV8 1xMethyl [R458(0); R469(100)]	P17066 1xMethyl [R471(100)]; P0DMV8 1xMethyl [R469(100)]	Heat shock 70 kDa protein 6 [OS=Homo sapiens] heat shock 70 kDa protein 1A [OS=Homo sapiens]	P17066; P0DMV8-2; P0DMV8	1	1980.07	18	FALSE	100	6.64				2.27003e+06		62.12		6							2395218	2.13181e+06	375058	322553	1.87547e+06	2.32352e+06
FALSE		High	Unambiguous	AVFVDLEPTVVDEVR	[R].AVFVDLEPTVVDEVR.[T]	1xMethyl [R15(100)]	1xMethyl [R15(100)]	0.001485	0.0010893	1.08	1	3	11	Q13748-1	Q13748-1 [65-79]	Q13748-1 1xMethyl [R79(100)]	Q13748-1 1xMethyl [R79(100)]	tubulin alpha-3C/D chain [OS=Homo sapiens]	Q13748-1; Q6PEY2; Q13748-2	0	1701.91	15	FALSE
FALSE		High	Unambiguous	FVAAEQSVALGEEVR	[R].FVAAEQSVALGEEVR.[R]	1xMethyl [R15(100)]	1xMethyl [R15(100)]	0.0584449	0.00272876	0.429	1	1	1	Q96MM6	Q96MM6 [577-591]	Q96MM6 1xMethyl [R591(100)]	Q96MM6 1xMethyl [R591(100)]	Heat shock 70 kDa protein 12B [OS=Homo sapiens]	Q96MM6	0	1618.84	15	FALSE
FALSE		High	Unambiguous	VSEKLEDQLSEGR	[K].VSEKLEDQLSEGR.[N]	1xMethyl [R13(100)]; 1xPhospho [S2(100)]; 1xAcetyl [K4(100)]	1xMethyl [K4(0); R13(100)]; 1xPhospho [S2(100); S10(0)]; 1xAcetyl [K4(100)]	0.00853836	0.0010893	0.771	1	1	8	Q5VUA4	Q5VUA4 [1229-1241]	Q5VUA4 1xMethyl [K1232(0); R1241(100)]; 1xPhospho [S1230(100); S1238(0)]; 1xAcetyl [K1232(100)]	Q5VUA4 1xMethyl [R1241(100)]; 1xPhospho [S1230(100)]; 1xAcetyl [K1232(100)]	Zinc finger protein 318 [OS=Homo sapiens]	Q5VUA4	1	1625.74	13	FALSE	0.01	-6.64			173364		60.43		6		119966	19351.8	43151.7	37612.7	129939	174382							257356	67411.9	116784	102868
FALSE		High	Unambiguous	FELSGIPPAPR	[R].FELSGIPPAPR.[G]	1xMethyl [R11(100)]	1xMethyl [R11(100)]	0.0075401	0.0010893	0.793	2	3	16	P17066; P0DMV8	P17066 [461-471]; P0DMV8 [459-469]	P17066 1xMethyl [R471(100)]; P0DMV8 1xMethyl [R469(100)]	P17066 1xMethyl [R471(100)]; P0DMV8 1xMethyl [R469(100)]	Heat shock 70 kDa protein 6 [OS=Homo sapiens] heat shock 70 kDa protein 1A [OS=Homo sapiens]	P17066; P0DMV8-2; P0DMV8	0	1197.66	11	FALSE	100	6.64				4.45671e+06		89.32		6							2.56512e+06	2.41827e+06	18067394	15032189	3.14095e+06	4.38188e+06
FALSE		High	Unambiguous	ISEQFSAMFRR	[R].ISEQFSAMFRR.[K]	1xMethyl [R10(99.7)]	1xMethyl [R10(99.7); R11(0.3)]	0.0681808	0.00434873	0.401	1	1	9	Q9BUF5	Q9BUF5 [381-391]	Q9BUF5 1xMethyl [R390(99.7); R391(0.3)]	Q9BUF5 1xMethyl [R390(99.7)]	Tubulin beta-6 chain [OS=Homo sapiens]	Q9BUF5	1	1385.7	11	FALSE
FALSE		High	Unambiguous	RVSEQFTAMFR	[K].RVSEQFTAMFR.[R]	1xMethyl [R1(100)]	1xMethyl [R1(100); R11(0)]	0.00418716	0.0010893	0.897	1	1	27	Q3ZCM7	Q3ZCM7 [380-390]	Q3ZCM7 1xMethyl [R380(100); R390(0)]	Q3ZCM7 1xMethyl [R380(100)]	tubulin beta-8 chain [OS=Homo sapiens]	Q3ZCM7	1	1385.7	11	FALSE
FALSE		High	Unambiguous	ETGVDLTKDNMALQR	[R].ETGVDLTKDNMALQR.[V]	1xMethyl [K8(100)]; 2xPhospho [T2(100); T7(100)]	1xMethyl [K8(100); R15(0)]; 2xPhospho [T2(100); T7(100)]	0.0807231	0.00514875	0.37	1	1	3	P38646	P38646 [293-307]	P38646 1xMethyl [K300(100); R307(0)]; 2xPhospho [T294(100); T299(100)]	P38646 1xMethyl [K300(100)]; 2xPhospho [T294(100); T299(100)]	Stress-70 protein, mitochondrial [OS=Homo sapiens]	P38646	1	1864.79	15	FALSE
FALSE		High	Unambiguous	GHYTIGKEIVDLVLDR	[R].GHYTIGKEIVDLVLDR.[I]	1xMethyl [K7(100)]	1xMethyl [K7(100); R16(0)]	0.0300433	0.00194901	0.548	1	3	1	Q13748-1	Q13748-1 [106-121]	Q13748-1 1xMethyl [K112(100); R121(0)]	Q13748-1 1xMethyl [K112(100)]	tubulin alpha-3C/D chain [OS=Homo sapiens]	Q13748-1; Q6PEY2; Q13748-2	1	1842.01	16	FALSE
FALSE		High	Unambiguous	LDKAQIHDVVLVGGSTR	[K].LDKAQIHDVVLVGGSTR.[I]	1xMethyl [K3(100)]	1xMethyl [K3(100); R17(0)]	0.000283224	0.0010893	1.372	1	1	62	P17066	P17066 [328-344]	P17066 1xMethyl [K330(100); R344(0)]	P17066 1xMethyl [K330(100)]	Heat shock 70 kDa protein 6 [OS=Homo sapiens]	P17066	1	1822.02	17	FALSE	0.01	-6.64			3.48387e+06		66.19		6		1596849	1.01711e+06	205104	153729	2.08075e+06	1.88371e+06							3.42564e+06	3.54309e+06	555084	420440
FALSE		High	Unambiguous	ASNGDAWVEAHGKLYSPSQIGAFVLMK	[R].ASNGDAWVEAHGKLYSPSQIGAFVLMK.[M]	1xMethyl [K13(100)]; 2xPhospho [S2(99); Y15(99)]	1xMethyl [K13(100); K27(0)]; 2xPhospho [S2(99); Y15(99); S16(2.1); S18(0)]	0.0430391	0.00272876	0.484	1	1	2	P38646	P38646 [147-173]	P38646 1xMethyl [K159(100); K173(0)]; 2xPhospho [S148(99); Y161(99); S162(2.1); S164(0)]	P38646 1xMethyl [K159(100)]; 2xPhospho [S148(99); Y161(99)]	Stress-70 protein, mitochondrial [OS=Homo sapiens]	P38646	1	3050.39	27	FALSE
FALSE		High	Unambiguous	TEMDWVLKHSGPNSADSANDGFVR	[R].TEMDWVLKHSGPNSADSANDGFVR.[L]	1xGG [K8]; 1xPhospho [T1(99.1)]	1xGG [K8]; 1xPhospho [T1(99.1); S10(0.9); S14(0); S17(0)]	0.0255154	0.00194901	0.577	1	1	1	P52597	P52597 [91-114]	P52597 1xPhospho [T91(99.1); S100(0.9); S104(0); S107(0)]	P52597 1xPhospho [T91(99.1)]	Heterogeneous nuclear ribonucleoprotein F [OS=Homo sapiens]	P52597	1	2827.21	24	FALSE
FALSE		High	Unambiguous	QATKDAGVIAGLNVLR	[R].QATKDAGVIAGLNVLR.[I]	1xGG [K4]; 1xPhospho [T3(100)]	1xGG [K4]; 1xPhospho [T3(100)]	0.00341524	0.0010893	0.933	2	3	2	P0DMV8; P34931	P0DMV8 [156-171]; P34931 [158-173]	P0DMV8 1xPhospho [T158(100)]; P34931 1xPhospho [T160(100)]	P0DMV8 1xPhospho [T158(100)]; P34931 1xPhospho [T160(100)]	heat shock 70 kDa protein 1A [OS=Homo sapiens] Heat shock 70 kDa protein 1-like [OS=Homo sapiens]	P0DMV8-2; P0DMV8; P34931	1	1819.94	16	FALSE
FALSE		High	Unambiguous	VSSKNSLESYAFNMK	[K].VSSKNSLESYAFNMK.[A]	1xGG [K4]	1xGG [K4]	0.00552483	0.0010893	0.848	1	1	1	P11142-1	P11142-1 [536-550]			Heat shock cognate 71 kDa protein [OS=Homo sapiens]	P11142-1	1	1818.87	15	FALSE
FALSE		High	Unambiguous	LIGDAAKNQVAMNPQNTVFDAKR	[R].LIGDAAKNQVAMNPQNTVFDAKR.[L]	1xGG [K22]; 1xMethyl [K7(100)]	1xGG [K22]; 1xMethyl [K7(100); K22(0); R23(0)]	0.0678083	0.00434873	0.402	1	1	6	P34931	P34931 [52-74]	P34931 1xMethyl [K58(100); K73(0); R74(0)]	P34931 1xMethyl [K58(100)]	Heat shock 70 kDa protein 1-like [OS=Homo sapiens]	P34931	2	2629.35	23	FALSE
FALSE		High	Unambiguous	ASNGDAWVEAHGKLYSPSQIGAFVLMK	[R].ASNGDAWVEAHGKLYSPSQIGAFVLMK.[M]	1xGG [K13]; 1xPhospho [Y15(99.5)]	1xGG [K13]; 1xPhospho [S2(0.6); Y15(99.5); S16(0); S18(0)]	0.00816095	0.0010893	0.779	1	1	8	P38646	P38646 [147-173]	P38646 1xPhospho [S148(0.6); Y161(99.5); S162(0); S164(0)]	P38646 1xPhospho [Y161(99.5)]	Stress-70 protein, mitochondrial [OS=Homo sapiens]	P38646	1	3070.45	27	FALSE
FALSE		High	Unambiguous	ETLFQELSVLQEK	[K].ETLFQELSVLQEK.[H]	1xGG [K13]; 1xPhospho [T/S]	1xGG [K13]; 1xPhospho [T2(50); S8(50)]	0.0543867	0.00272876	0.442	1	1	2	Q8WWL7-1	Q8WWL7-1 [324-336]			G2/mitotic-specific cyclin-B3 [OS=Homo sapiens]	Q8WWL7-1	0	1757.84	13	FALSE
FALSE		High	Unambiguous	QLFHPEQLITGKEDAANNYAR	[R].QLFHPEQLITGKEDAANNYAR.[G]	1xGG [K12]; 1xPhospho [T10(100)]	1xGG [K12]; 1xPhospho [T10(100); Y19(0)]	0.00853836	0.0010893	0.771	3	11	3	Q13748-1; P68363; Q9BQE3	Q13748-1 [85-105]; P68363 [85-105]; Q9BQE3 [85-105]	Q13748-1 1xPhospho [T94(100); Y103(0)]; P68363 1xPhospho [T94(100); Y103(0)]; Q9BQE3 1xPhospho [T94(100); Y103(0)]	Q13748-1 1xPhospho [T94(100)]; P68363 1xPhospho [T94(100)]; Q9BQE3 1xPhospho [T94(100)]	tubulin alpha-3C/D chain [OS=Homo sapiens] Tubulin alpha-1B chain [OS=Homo sapiens] Tubulin alpha-1C chain [OS=Homo sapiens]	Q13748-1; Q13748-2; Q71U36; Q9NY65; P68366-2; P68363; Q71U36-2; Q9BQE3; P68363-2; Q9NY65-2; P68366	1	2609.21	21	FALSE
FALSE		High	Unambiguous	RFDDAVVQSDMKHWPFMVVNDAGRPK	[R].RFDDAVVQSDMKHWPFMVVNDAGRPK.[V]	1xGG [K12]; 1xMethyl [R1(100)]	1xGG [K12]; 1xMethyl [R1(100); K12(0); R24(0); K26(0)]	0.0113891	0.0010893	0.72	1	2	4	P11142-1	P11142-1 [77-102]	P11142-1 1xMethyl [R77(100); K88(0); R100(0); K102(0)]	P11142-1 1xMethyl [R77(100)]	Heat shock cognate 71 kDa protein [OS=Homo sapiens]	P11142-1; P11142-2	2	3173.54	26	FALSE	0.01	-6.64			4.23393e+06		76.44		3					131673	1.94996e+06	2.0291e+06										360119
FALSE		High	Unambiguous	ADHWMLYECESPWAGGSR	[R].ADHWMLYECESPWAGGSR.[G]	1xCarbamidomethyl [C9]; 1xOxidation [M5]	1xCarbamidomethyl [C9]; 1xOxidation [M5]	5.09585e-05	0.0010893	1.674	1	1	16	O14734	O14734 [267-284]			Acyl-coenzyme A thioesterase 8 [OS=Homo sapiens]	O14734	0	2167.9	18	FALSE	0.01	-6.64			128488		61.12		6		145267	80255.8	47948.8	46517.4	31775	39860.3							311635	279571	129767	127222
FALSE		High	Unambiguous	NKNEVFYQCPDQMAR	[R].NKNEVFYQCPDQMAR.[N]	1xCarbamidomethyl [C9]; 1xOxidation [M13]	1xCarbamidomethyl [C9]; 1xOxidation [M13]	1.77175e-05	0.0010893	1.86	1	3	9	Q9UK99	Q9UK99 [217-231]			F-box only protein 3 [OS=Homo sapiens]	Q9UK99-3; Q9UK99; Q9UK99-2	1	1915.84	15	FALSE	100	6.64				91259.6		118.95		5							1.09228e+06	1.26285e+06		47545.6	73980.4	68279.4
FALSE		High	Unambiguous	ADHWMLYECESPWAGGSR	[R].ADHWMLYECESPWAGGSR.[G]	1xCarbamidomethyl [C9]	1xCarbamidomethyl [C9]	6.20904e-07	0.0010893	2.45	1	1	25	O14734	O14734 [267-284]			Acyl-coenzyme A thioesterase 8 [OS=Homo sapiens]	O14734	0	2151.9	18	FALSE	0.01	-6.64			455768		31.7		6		140107	67660.9	216825	178105	228514	204373							300565	235697	586807	487106
FALSE		High	Unambiguous	AQLVEIVGCHFR	[K].AQLVEIVGCHFR.[S]	1xCarbamidomethyl [C9]	1xCarbamidomethyl [C9]	7.81973e-06	0.0010893	2.004	1	1	72	O75446	O75446 [176-187]			Histone deacetylase complex subunit SAP30 [OS=Homo sapiens]	O75446	0	1428.74	12	FALSE	1.053	0.07	0.367563	0.593615	1.77402e+07	1.86843e+07	22.99	24.76	6	6	10184724	5124977	4741711	4.3281e+06	8538507	8448306	24311138	23852466	12693854	16008601	13370729	18092214	2.18488e+07	1.78529e+07	1.28328e+07	1.18371e+07
FALSE		High	Unambiguous	DGHYTTFACNK	[R].DGHYTTFACNK.[D]	1xCarbamidomethyl [C9]	1xCarbamidomethyl [C9]	0.0265418	0.00194901	0.57	1	1	1	P51784	P51784 [886-896]			Ubiquitin carboxyl-terminal hydrolase 11 [OS=Homo sapiens]	P51784	0	1313.56	11	FALSE
FALSE		High	Unambiguous	FWQAHSGICTR	[R].FWQAHSGICTR.[T]	1xCarbamidomethyl [C9]	1xCarbamidomethyl [C9]	0.0764602	0.00434873	0.38	1	3	2	Q9BVC4	Q9BVC4 [26-36]			target of rapamycin complex subunit LST8 [OS=Homo sapiens]	Q9BVC4; Q9BVC4-5; Q9BVC4-4	0	1362.64	11	FALSE
FALSE		High	Unambiguous	MTGGGFGGCTVTLLEASAAPHAMR	[R].MTGGGFGGCTVTLLEASAAPHAMR.[H]	1xCarbamidomethyl [C9]	1xCarbamidomethyl [C9]	2.607e-05	0.0010893	1.792	1	2	2	P51570	P51570 [343-366]			galactokinase [OS=Homo sapiens]	P51570; P51570-2	0	2392.12	24	FALSE
FALSE		High	Unambiguous	NKNEVFYQCPDQMAR	[R].NKNEVFYQCPDQMAR.[N]	1xCarbamidomethyl [C9]	1xCarbamidomethyl [C9]	1.44734e-06	0.0010893	2.301	1	3	41	Q9UK99	Q9UK99 [217-231]			F-box only protein 3 [OS=Homo sapiens]	Q9UK99-3; Q9UK99; Q9UK99-2	1	1899.85	15	FALSE	1.223	0.29	0.288203	0.503188	1.13264e+06	1.38544e+06	53.69	59.27	6	6	232867	145436	735326	675684	485369	549143	770755	853583	2821479	3.11569e+06	892101	1.49092e+06	499559	506628	1.99006e+06	1.84795e+06
FALSE		High	Unambiguous	NMSVHLSPCFR	[K].NMSVHLSPCFR.[D]	1xCarbamidomethyl [C9]	1xCarbamidomethyl [C9]	0.0604135	0.00272876	0.423	1	1	1	P62280	P62280 [108-118]			40S ribosomal protein S11 [OS=Homo sapiens]	P62280	0	1347.63	11	FALSE
FALSE		High	Unambiguous	SINTEVVACSVDSQFTHLAWINTPR	[R].SINTEVVACSVDSQFTHLAWINTPR.[R]	1xCarbamidomethyl [C9]	1xCarbamidomethyl [C9]	7.24693e-05	0.0010893	1.612	1	1	1	Q13162	Q13162 [140-164]			Peroxiredoxin-4 [OS=Homo sapiens]	Q13162	0	2845.39	25	FALSE	100	6.64				4.42218e+06		53.09		3									4.16408e+06	4.81772e+06		1.18154e+06
FALSE		High	Unambiguous	QMELHSQCFQDPAESER	[R].QMELHSQCFQDPAESER.[A]	1xCarbamidomethyl [C8]; 1xOxidation [M2]	1xCarbamidomethyl [C8]; 1xOxidation [M2]	2.03051e-05	0.0010893	1.836	1	2	12	Q9H160	Q9H160 [117-133]			Inhibitor of growth protein 2 [OS=Homo sapiens]	Q9H160; Q9H160-2	0	2107.88	17	FALSE	0.926	-0.11	0.469737	0.676497	167758	155408	106.84	105.02	6	4	513316	378098	59805.4	61417.9	63975.3	80294	588630	682647			32829.7	23380.7	1.10119e+06	1.3171e+06	161855	167974
FALSE		High	Unambiguous	AVAHHTDCTFIR	[R].AVAHHTDCTFIR.[V]	1xCarbamidomethyl [C8]	1xCarbamidomethyl [C8]	0.0100584	0.0010893	0.742	1	2	8	P62195-1	P62195-1 [202-213]			26S proteasome regulatory subunit 8 [OS=Homo sapiens]	P62195-2; P62195-1	0	1427.68	12	FALSE	0.01	-6.64			99349		57.54		5		40332.4		82179.8	17951.3	43070.5	51976.5							86523.2		222408	49095.8
FALSE		High	Unambiguous	DLLLHDQCQITTLR	[R].DLLLHDQCQITTLR.[L]	1xCarbamidomethyl [C8]	1xCarbamidomethyl [C8]	0.0520243	0.00272876	0.45	1	2	2	Q86UT6	Q86UT6 [772-785]			NLR family member X1 [OS=Homo sapiens]	Q86UT6-2; Q86UT6	0	1725.9	14	FALSE
FALSE		High	Unambiguous	HRPTVVECLR	[R].HRPTVVECLR.[E]	1xCarbamidomethyl [C8]	1xCarbamidomethyl [C8]	0.00766905	0.0010893	0.79	1	1	4	O75843	O75843 [347-356]			AP-1 complex subunit gamma-like 2 [OS=Homo sapiens]	O75843	0	1266.67	10	FALSE
FALSE		High	Unambiguous	KLLEGEECR	[R].KLLEGEECR.[MLI]	1xCarbamidomethyl [C8]	1xCarbamidomethyl [C8]	0.0918636	0.00584769	0.346	3	19	3	KRT2; KRT6B; KRT5	KRT2 [482-490]; KRT6B [467-475]; KRT5 [473-481]			Keratin, type II cytoskeletal 2 epidermal OS=Homo sapiens GN=KRT2 PE=1 SV=2 Keratin, type II cytoskeletal 6B OS=Homo sapiens GN=KRT6B PE=1 SV=5 Keratin, type II cytoskeletal 5 OS=Bos taurus GN=KRT5 PE=1 SV=1	KRT74; Krt2; Q86Y46; KRT2; Krt73; KRT6B; KRT6A; KRT76; KRT75; Krt6a; Krt75; KRT5; KRT6C; Krt4; P12036; KRT2; Krt5; KRT5; P12036-2	1	1133.56	9	TRUE
FALSE		High	Unambiguous	QMELHSQCFQDPAESER	[R].QMELHSQCFQDPAESER.[A]	1xCarbamidomethyl [C8]	1xCarbamidomethyl [C8]	1.24863e-06	0.0010893	2.327	1	2	25	Q9H160	Q9H160 [117-133]			Inhibitor of growth protein 2 [OS=Homo sapiens]	Q9H160; Q9H160-2	0	2091.89	17	FALSE	0.479	-1.06	0.0258634	0.121071	1.90198e+06	911225	33.48	25.24	6	6	466417	244184	721428	677466	848689	994430	684884	676561	1.01287e+06	1.20701e+06	625778	986298	1.00058e+06	850617	1.95244e+06	1.85283e+06
FALSE		High	Unambiguous	RSTSSFSCLSR	[R].RSTSSFSCLSR.[H]	1xCarbamidomethyl [C8]	1xCarbamidomethyl [C8]	0.00604809	0.0010893	0.832	1	1	24	KRT2	KRT2 [35-45]			Keratin, type II cytoskeletal 2 epidermal OS=Homo sapiens GN=KRT2 PE=1 SV=2	KRT2	1	1287.61	11	TRUE	0.572	-0.81	0.291385	0.506007	393800	225087	50.73	82.6	4	6			236743	216345	96117.6	125608	297497	755270	81121.5	365692	122309	143680			640710	591689
FALSE		High	Unambiguous	SIQFVDWCPTGFK	[R].SIQFVDWCPTGFK.[V]	1xCarbamidomethyl [C8]	1xCarbamidomethyl [C8]	0.0704566	0.00434873	0.395	1	4	1	P68363	P68363 [340-352]			Tubulin alpha-1B chain [OS=Homo sapiens]	P68366-2; P68363; P68363-2; P68366	0	1584.75	13	FALSE
FALSE		High	Unambiguous	GLMAIDCPHTGIVDYR	[R].GLMAIDCPHTGIVDYR.[Q]	1xCarbamidomethyl [C7]; 1xOxidation [M3]	1xCarbamidomethyl [C7]; 1xOxidation [M3]	0.0121189	0.0010893	0.709	1	2	1	Q9H9P8-1	Q9H9P8-1 [181-196]			L-2-hydroxyglutarate dehydrogenase, mitochondrial [OS=Homo sapiens]	Q9H9P8-2; Q9H9P8-1	0	1833.86	16	FALSE	0.01	-6.64			197554				1			56711.2												197554
FALSE		High	Unambiguous	ALQSGQCAGAALDVFTEEPPRDR	[R].ALQSGQCAGAALDVFTEEPPRDR.[A]	1xCarbamidomethyl [C7]	1xCarbamidomethyl [C7]	0.00335772	0.0010893	0.936	1	1	6	O43175	O43175 [248-270]			D-3-phosphoglycerate dehydrogenase [OS=Homo sapiens]	O43175	1	2488.19	23	FALSE
FALSE		High	Unambiguous	AQFEQLCASLLAR	[R].AQFEQLCASLLAR.[V]	1xCarbamidomethyl [C7]	1xCarbamidomethyl [C7]	3.52272e-05	0.0010893	1.739	1	1	7	O95757	O95757 [304-316]			Heat shock 70 kDa protein 4L [OS=Homo sapiens]	O95757	0	1506.77	13	FALSE	0.01	-6.64			103128		28.4		6		53278.3	15602.1	34382.9	30031.7	55889.5	58349.1							114295	54350.1	93052.3	82135
FALSE		High	Unambiguous	ARFEELCSDLFR	[R].ARFEELCSDLFR.[S]	1xCarbamidomethyl [C7]	1xCarbamidomethyl [C7]	3.27929e-06	0.0010893	2.157	2	4	428	P17066; P0DMV8	P17066 [302-313]; P0DMV8 [300-311]			Heat shock 70 kDa protein 6 [OS=Homo sapiens] heat shock 70 kDa protein 1A [OS=Homo sapiens]	P48741; P17066; P0DMV8-2; P0DMV8	1	1542.74	12	FALSE	1.562	0.64	0.0992844	0.265032	5.07022e+08	7.91794e+08	17.77	31.79	6	6	2.4903e+08	1.38136e+08	1.64903e+08	1.49636e+08	2.84849e+08	2.80778e+08	7.60633e+08	7.78631e+08	4.05044e+08	4.62086e+08	760946423	825326071	5.34233e+08	4.81197e+08	4.46287e+08	4.09246e+08
FALSE		High	Unambiguous	EHINLGCDMDFDIAGPSIR	[R].EHINLGCDMDFDIAGPSIR.[G]	1xCarbamidomethyl [C7]	1xCarbamidomethyl [C7]	0.00353324	0.0010893	0.927	1	1	25	P21796	P21796 [121-139]			voltage-dependent anion-selective channel protein 1 [OS=Homo sapiens]	P21796	0	2159.98	19	FALSE
FALSE		High	Unambiguous	GLMAIDCPHTGIVDYR	[R].GLMAIDCPHTGIVDYR.[Q]	1xCarbamidomethyl [C7]	1xCarbamidomethyl [C7]	0.000446054	0.0010893	1.292	1	2	7	Q9H9P8-1	Q9H9P8-1 [181-196]			L-2-hydroxyglutarate dehydrogenase, mitochondrial [OS=Homo sapiens]	Q9H9P8-2; Q9H9P8-1	0	1817.87	16	FALSE	0.799	-0.32	0.282091	0.502791	544054	434528	20.58	18.75	6	6	202526	103188	241011	213542	247463	248513	367686	372957	457989	599890	325359	402131	434469	359456	652261	584025
FALSE		High	Unambiguous	GSSGGGCFGGSSGGYGGLGGFGGGSFR	[R].GSSGGGCFGGSSGGYGGLGGFGGGSFR.[G]	1xCarbamidomethyl [C7]	1xCarbamidomethyl [C7]	1.59212e-08	0.0010893	3.095	1	1	11	KRT10	KRT10 [60-86]			Keratin, type I cytoskeletal 10 OS=Homo sapiens GN=KRT10 PE=1 SV=6	KRT10	0	2342.98	27	TRUE	100	6.64				1.74978e+06		39.82		6							2.01627e+06	1.56864e+06	1.28462e+06	409515	1.51441e+06	1.7505e+06
FALSE		High	Unambiguous	HSSLAGCQIINYR	[R].HSSLAGCQIINYR.[T]	1xCarbamidomethyl [C7]	1xCarbamidomethyl [C7]	0.00296445	0.0010893	0.958	1	2	2	Q00610-1	Q00610-1 [145-157]			Clathrin heavy chain 1 [OS=Homo sapiens]	Q00610-1; Q00610-2	0	1518.75	13	FALSE
FALSE		High	Unambiguous	QASLADCLNHAVGFASR	[R].QASLADCLNHAVGFASR.[T]	1xCarbamidomethyl [C7]	1xCarbamidomethyl [C7]	0.00132581	0.0010893	1.1	1	1	16	O43592	O43592 [644-660]			Exportin-T [OS=Homo sapiens]	O43592	0	1816.88	17	FALSE	0.01	-6.64			226635		37.91		6		110580	62155.7	136760	127173	71043.2	69324.7							237222	216519	370122	347811
FALSE		High	Unambiguous	QVQSLTCEVDALKGTNESLER	[R].QVQSLTCEVDALKGTNESLER.[Q]	1xCarbamidomethyl [C7]	1xCarbamidomethyl [C7]	0.00534047	0.0010893	0.854	1	1	13	P08670	P08670 [322-342]			Vimentin [OS=Homo sapiens]	P08670	1	2377.17	21	FALSE	0.01	-6.64			533342		34.71		4		382324	165153	182695	130104									820181	575309	494437	355826
FALSE		High	Unambiguous	SLHDALCVLAQTVK	[R].SLHDALCVLAQTVK.[D]	1xCarbamidomethyl [C7]	1xCarbamidomethyl [C7]	0.00105076	0.0010893	1.141	1	2	28	P78371-1	P78371-1 [389-402]			T-complex protein 1 subunit beta [OS=Homo sapiens]	P78371-2; P78371-1	0	1554.83	14	FALSE	0.01	-6.64			123479		53.34		6		54736.3	29066.3	117833	99215.4	54313.4	58325.2							117423	101252	318897	271348
FALSE		High	Unambiguous	SIHDALCVIR	[R].SIHDALCVIR.[CN]	1xCarbamidomethyl [C7]	1xCarbamidomethyl [C7]	0.0153608	0.0010893	0.667	2	4	16	P50991; P48643	P50991 [404-413]; P48643 [401-410]			T-complex protein 1 subunit delta [OS=Homo sapiens] T-complex protein 1 subunit epsilon [OS=Homo sapiens]	P50991; P48643-2; P50991-2; P48643	0	1183.63	10	FALSE	100	6.64				1.0659e+06		70.95		6							1.0035e+06	1.06954e+06	2.95593e+06	3.1626e+06	563225	664466
FALSE		High	Unambiguous	SLHDALCVVK	[R].SLHDALCVVK.[R]	1xCarbamidomethyl [C7]	1xCarbamidomethyl [C7]	0.10166	0.0064943	0.327	1	1	1	P17987	P17987 [391-400]			T-complex protein 1 subunit alpha [OS=Homo sapiens]	P17987	0	1141.6	10	FALSE	100	6.64				68661.5		47.01		5							110459	126082		46699.2	39676	58690.6
FALSE		High	Unambiguous	SPGLVLCHGGIFVPFLR	[R].SPGLVLCHGGIFVPFLR.[A]	1xCarbamidomethyl [C7]	1xCarbamidomethyl [C7]	0.00105076	0.0010893	1.141	1	2	3	Q2T9J0	Q2T9J0 [42-58]			Peroxisomal leader peptide-processing protease [OS=Homo sapiens]	Q2T9J0-2; Q2T9J0	0	1869.02	17	FALSE	0.01	-6.64			440386		34.21		6		217844	119132	94762.5	86341.3	257916	238298							467330	414996	256461	236138
FALSE		High	Unambiguous	SQFEELCAELLQK	[R].SQFEELCAELLQK.[I]	1xCarbamidomethyl [C7]	1xCarbamidomethyl [C7]	2.66691e-05	0.0010893	1.788	1	4	37	Q92598	Q92598 [304-316]			Heat shock protein 105 kDa [OS=Homo sapiens]	Q92598-3; Q92598-2; Q92598-4; Q92598	0	1594.78	13	FALSE	0.788	-0.34	0.433501	0.656721	1.52972e+06	1.205e+06	19.4	51.76	6	6	556682	320647	615387	667767	609127	804664	1.52849e+06	844637	2.44574e+06	1.38926e+06	506639	893402	1.19422e+06	1.11697e+06	1.66546e+06	1.8263e+06
FALSE		High	Unambiguous	SRFEQFCHLR	[R].SRFEQFCHLR.[A]	1xCarbamidomethyl [C7]	1xCarbamidomethyl [C7]	0.000502524	0.0010893	1.271	1	1	62	O14654	O14654 [375-384]			insulin receptor substrate 4 [OS=Homo sapiens]	O14654	1	1379.66	10	FALSE	0.01	-6.64			1.10822e+06		35.25		6		596995	434589	261054	214773	596133	459582							1.2807e+06	1.51389e+06	706506	587390
FALSE		High	Unambiguous	YESLELCRPVLQQGR	[K].YESLELCRPVLQQGR.[K]	1xCarbamidomethyl [C7]	1xCarbamidomethyl [C7]	0.0752227	0.00434873	0.383	1	2	2	Q00610-1	Q00610-1 [430-444]			Clathrin heavy chain 1 [OS=Homo sapiens]	Q00610-1; Q00610-2	0	1847.94	15	FALSE	0.01	-6.64			98397.4		52.24		6		43045.7	30098.3	51707.1	51463.8	15487.4	16305.1							92344	104848	139938	140750
FALSE		High	Unambiguous	YNPTWHCIVGR	[K].YNPTWHCIVGR.[N]	1xCarbamidomethyl [C7]	1xCarbamidomethyl [C7]	0.0652535	0.00359603	0.409	1	2	12	P63167	P63167 [50-60]			Dynein light chain 1, cytoplasmic [OS=Homo sapiens]	Q96FJ2; P63167	0	1402.67	11	FALSE	0.01	-6.64			1.42024e+06		24.12		6		593056	328228	764152	706632	629939	665276							1.27225e+06	1.14338e+06	2.06807e+06	1.9326e+06
FALSE		High	Unambiguous	YVHDPECVATTGDITVSVSTSFLPELSSVHPPHYFFTYR	[R].YVHDPECVATTGDITVSVSTSFLPELSSVHPPHYFFTYR.[I]	1xCarbamidomethyl [C7]	1xCarbamidomethyl [C7]	0.110633	0.0064943	0.311	1	3	1	Q9UK99	Q9UK99 [271-309]			F-box only protein 3 [OS=Homo sapiens]	Q9UK99-3; Q9UK99; Q9UK99-2	0	4456.12	39	FALSE
FALSE		High	Unambiguous	EMAAMCLGLAHSLSR	[R].EMAAMCLGLAHSLSR.[Y]	1xCarbamidomethyl [C6]; 2xOxidation [M2; M5]	1xCarbamidomethyl [C6]; 2xOxidation [M2; M5]	0.00118366	0.0010893	1.12	1	1	4	Q9Y2X3	Q9Y2X3 [134-148]			Nucleolar protein 58 [OS=Homo sapiens]	Q9Y2X3	0	1678.77	15	FALSE
FALSE		High	Unambiguous	AAAALCTLYHEAGQR	[R].AAAALCTLYHEAGQR.[L]	1xCarbamidomethyl [C6]	1xCarbamidomethyl [C6]	0.00136393	0.0010893	1.095	1	1	2	Q8NFZ5-1	Q8NFZ5-1 [16-30]			TNFAIP3-interacting protein 2 [OS=Homo sapiens]	Q8NFZ5-1	0	1631.8	15	FALSE
FALSE		High	Unambiguous	DPHLACVAYER	[R].DPHLACVAYER.[G]	1xCarbamidomethyl [C6]	1xCarbamidomethyl [C6]	0.000266075	0.0010893	1.383	1	4	5	Q00610-1	Q00610-1 [913-923]			Clathrin heavy chain 1 [OS=Homo sapiens]	Q00610-1; P53675-2; P53675; Q00610-2	0	1330.62	11	FALSE	0.01	-6.64			74800.1		110.82		6		28782.6	19909.8	218142	217981	28786.2	38661.8							61746	69355.6	590371	596164
FALSE		High	Unambiguous	EMAAMCLGLAHSLSR	[R].EMAAMCLGLAHSLSR.[Y]	1xCarbamidomethyl [C6]	1xCarbamidomethyl [C6]	0.0423226	0.00272876	0.487	1	1	1	Q9Y2X3	Q9Y2X3 [134-148]			Nucleolar protein 58 [OS=Homo sapiens]	Q9Y2X3	0	1646.78	15	FALSE
FALSE		High	Unambiguous	EYVELCDAAGRPDQEVAQEAWQNHK	[K].EYVELCDAAGRPDQEVAQEAWQNHK.[R]	1xCarbamidomethyl [C6]	1xCarbamidomethyl [C6]	0.0086354	0.0010893	0.769	1	1	7	P51784	P51784 [423-447]			Ubiquitin carboxyl-terminal hydrolase 11 [OS=Homo sapiens]	P51784	0	2943.33	25	FALSE	0.01	-6.64			338244		51.62		6		122160	72466.1	259480	248078	94385.1	209226							262063	252436	702246	678479
FALSE		High	Unambiguous	GHNQPCLLVGSGR	[R].GHNQPCLLVGSGR.[C]	1xCarbamidomethyl [C6]	1xCarbamidomethyl [C6]	0.000200304	0.0010893	1.433	1	1	19	P27708	P27708 [275-287]			CAD protein [OS=Homo sapiens]	P27708	0	1394.7	13	FALSE	0.01	-6.64			1.10206e+06		50.44		6		447682	374841	513696	462394	154392	171482							960390	1.30576e+06	1.39024e+06	1.26462e+06
FALSE		High	Unambiguous	GLPWSCSADEVQR	[R].GLPWSCSADEVQR.[F]	1xCarbamidomethyl [C6]	1xCarbamidomethyl [C6]	0.0124658	0.0010893	0.704	1	1	1	P31943	P31943 [17-29]			Heterogeneous nuclear ribonucleoprotein H [OS=Homo sapiens]	P31943	0	1504.68	13	FALSE
FALSE		High	Unambiguous	GRPAVCQPQGR	[R].GRPAVCQPQGR.[F]	1xCarbamidomethyl [C6]	1xCarbamidomethyl [C6]	0.00793358	0.0010893	0.784	1	1	2	Q5T749	Q5T749 [167-177]			Keratinocyte proline-rich protein [OS=Homo sapiens]	Q5T749	0	1225.62	11	FALSE
FALSE		High	Unambiguous	GVIALCIEDGSIHR	[R].GVIALCIEDGSIHR.[I]	1xCarbamidomethyl [C6]	1xCarbamidomethyl [C6]	0.0179892	0.0010893	0.639	1	2	23	P31040	P31040 [233-246]			Succinate dehydrogenase [ubiquinone] flavoprotein subunit, mitochondrial [OS=Homo sapiens]	P31040-2; P31040	0	1539.79	14	FALSE	2.18	1.12	0.000314559	0.00483821	937353	2.04316e+06	17.03	34.14	6	6	426627	197127	416735	381511	416194	393231	2.06503e+06	1.90969e+06	2498305	3.76458e+06	1.23026e+06	1.64894e+06	915222	686692	1.12783e+06	1.04341e+06
FALSE		High	Unambiguous	KLADQCTGLQGFLVFHSFGGGTGSGFTSLLMER	[R].KLADQCTGLQGFLVFHSFGGGTGSGFTSLLMER.[L]	1xCarbamidomethyl [C6]	1xCarbamidomethyl [C6]	0.0235798	0.00194901	0.591	2	4	4	P68363; Q9BQE3	P68363 [124-156]; Q9BQE3 [124-156]			Tubulin alpha-1B chain [OS=Homo sapiens] Tubulin alpha-1C chain [OS=Homo sapiens]	Q71U36; P68363; Q71U36-2; Q9BQE3	1	3518.72	33	FALSE	0.01	-6.64			129883		38.36		3			36245.8	47991.9	86773.8										126262	129883	237321
FALSE		High	Unambiguous	LPLMECVQMTQDVQK	[R].LPLMECVQMTQDVQK.[A]	1xCarbamidomethyl [C6]	1xCarbamidomethyl [C6]	0.00384635	0.0010893	0.912	1	2	6	Q01813	Q01813 [355-369]			ATP-dependent 6-phosphofructokinase, platelet type [OS=Homo sapiens]	Q01813; Q01813-2	0	1819.88	15	FALSE	0.01	-6.64			160535		45.18		6		39196.7	15219	60434.1	57613.6	96370.1	98448.1							84086.8	53015.5	163556	157570
FALSE		High	Unambiguous	RPSANCDPFSVTEALIR	[R].RPSANCDPFSVTEALIR.[T]	1xCarbamidomethyl [C6]	1xCarbamidomethyl [C6]	9.14725e-05	0.0010893	1.571	1	1	26	P15104	P15104 [341-357]			Glutamine synthetase [OS=Homo sapiens]	P15104	0	1932.96	17	FALSE	0.01	-6.64			132845		28.67		6		39666.4	21172.1	55258.8	47418.4	69384.3	65215.8							85094.4	73752.9	149550	129686
FALSE		High	Unambiguous	TREEECHFYAGGQVYPGEASR	[R].TREEECHFYAGGQVYPGEASR.[V]	1xCarbamidomethyl [C6]	1xCarbamidomethyl [C6]	1.77175e-05	0.0010893	1.86	1	1	57	Q13162	Q13162 [46-66]			Peroxiredoxin-4 [OS=Homo sapiens]	Q13162	1	2443.07	21	FALSE	0.307	-1.7	0.000360925	0.00506864	843039	258856	31.86	20.44	6	5	206018	137545	314668	311146	455705	400262	224833	215858	252592		209844	307912	441961	479137	851603	850964
FALSE		High	Unambiguous	DLNYCFSGMSDHR	[R].DLNYCFSGMSDHR.[Y]	1xCarbamidomethyl [C5]; 1xOxidation [M9]	1xCarbamidomethyl [C5]; 1xOxidation [M9]	0.0117152	0.0010893	0.715	2	2	5	P31943; P55795	P31943 [263-275]; P55795 [263-275]			Heterogeneous nuclear ribonucleoprotein H [OS=Homo sapiens] heterogeneous nuclear ribonucleoprotein H2 [OS=Homo sapiens]	P31943; P55795	0	1617.64	13	FALSE	100	6.64				152625		111.37		5							1.37524e+06	1.50351e+06	109850	111580	123727
FALSE		High	Unambiguous	FHMACPTFR	[R].FHMACPTFR.[V]	1xCarbamidomethyl [C5]; 1xOxidation [M3]	1xCarbamidomethyl [C5]; 1xOxidation [M3]	0.00677222	0.0010893	0.812	1	3	19	Q9UK99	Q9UK99 [399-407]			F-box only protein 3 [OS=Homo sapiens]	Q9UK99-3; Q9UK99; Q9UK99-2	0	1182.52	9	FALSE	1.963	0.97	0.334869	0.568716	2.48447e+06	4.87752e+06	13.5	92.31	2	6	1274490	648091					11356403	15833211	4.57144e+06	4.90037e+06	673432	1.17363e+06	2.7341e+06	2.25763e+06
FALSE		High	Unambiguous	TYFSCTSAHTSTGDGTAMITR	[R].TYFSCTSAHTSTGDGTAMITR.[A]	1xCarbamidomethyl [C5]; 1xOxidation [M18]	1xCarbamidomethyl [C5]; 1xOxidation [M18]	6.29402e-08	0.0010893	2.853	1	2	9	P31040	P31040 [262-282]			Succinate dehydrogenase [ubiquinone] flavoprotein subunit, mitochondrial [OS=Homo sapiens]	P31040-2; P31040	0	2280.99	21	FALSE	0.321	-1.64	0.709032	0.845082	169059	54230.8	48.67	104.73	4	5	108277	71922.7	45465	28902.4			406686	471269	51065.6	53005.8		39394	232281	250543	123045	79046.3
FALSE		High	Unambiguous	AETECQNTEYQQLLDIK	[R].AETECQNTEYQQLLDIK.[I]	1xCarbamidomethyl [C5]	1xCarbamidomethyl [C5]	7.92674e-07	0.0010893	2.407	1	1	26	KRT10	KRT10 [423-439]			Keratin, type I cytoskeletal 10 OS=Homo sapiens GN=KRT10 PE=1 SV=6	KRT10	0	2082.96	17	TRUE
FALSE		High	Unambiguous	DHQPCIIFMDEIDAIGGR	[R].DHQPCIIFMDEIDAIGGR.[R]	1xCarbamidomethyl [C5]	1xCarbamidomethyl [C5]	0.000718509	0.0010893	1.208	1	1	4	P62333	P62333 [224-241]			26S proteasome regulatory subunit 10B [OS=Homo sapiens]	P62333	0	2086.97	18	FALSE
FALSE		High	Unambiguous	DLNYCFSGMSDHR	[R].DLNYCFSGMSDHR.[Y]	1xCarbamidomethyl [C5]	1xCarbamidomethyl [C5]	0.10166	0.0064943	0.327	2	2	4	P31943; P55795	P31943 [263-275]; P55795 [263-275]			Heterogeneous nuclear ribonucleoprotein H [OS=Homo sapiens] heterogeneous nuclear ribonucleoprotein H2 [OS=Homo sapiens]	P31943; P55795	0	1601.65	13	FALSE	100	6.64				3.51624e+06		30.88		6							2906781	3.03782e+06	3.06268e+06	3.84803e+06	5.02357e+06	3.24932e+06
FALSE		High	Unambiguous	DLSYCLSGMYDHR	[R].DLSYCLSGMYDHR.[Y]	1xCarbamidomethyl [C5]	1xCarbamidomethyl [C5]	0.028398	0.00194901	0.558	1	1	10	P52597	P52597 [263-275]			Heterogeneous nuclear ribonucleoprotein F [OS=Homo sapiens]	P52597	0	1616.68	13	FALSE	0.895	-0.16	0.651523	0.798707	1.42107e+06	1.27185e+06	35.71	32.84	6	6	482351	255562	813177	769542	629795	666210	949859	886602	1.55784e+06	2.07698e+06	918808	1.21994e+06	1.03477e+06	890249	2.20075e+06	2.10465e+06
FALSE		High	Unambiguous	FEELCSDLFR	[R].FEELCSDLFR.[S]	1xCarbamidomethyl [C5]	1xCarbamidomethyl [C5]	0.00131086	0.0010893	1.102	2	4	1	P17066; P0DMV8	P17066 [304-313]; P0DMV8 [302-311]			Heat shock 70 kDa protein 6 [OS=Homo sapiens] heat shock 70 kDa protein 1A [OS=Homo sapiens]	P48741; P17066; P0DMV8-2; P0DMV8	0	1315.6	10	FALSE
FALSE		High	Unambiguous	FEQFCHLR	[R].FEQFCHLR.[A]	1xCarbamidomethyl [C5]	1xCarbamidomethyl [C5]	0.00215864	0.0010893	1.014	1	1	26	O14654	O14654 [377-384]			insulin receptor substrate 4 [OS=Homo sapiens]	O14654	0	1136.53	8	FALSE	0.795	-0.33	0.0416853	0.170435	1.50698e+06	1.19737e+06	31.54	36.88	6	6	984660	703818	551476	556360	489597	581499	1.14166e+06	1.24854e+06	1.19398e+06	1.23951e+06	366081	531809	2.11234e+06	2.45175e+06	1.49249e+06	1.52161e+06
FALSE		High	Unambiguous	FHMACPTFR	[R].FHMACPTFR.[V]	1xCarbamidomethyl [C5]	1xCarbamidomethyl [C5]	0.0345817	0.00194901	0.523	1	3	28	Q9UK99	Q9UK99 [399-407]			F-box only protein 3 [OS=Homo sapiens]	Q9UK99-3; Q9UK99; Q9UK99-2	0	1166.52	9	FALSE	100	6.64				2.08527e+07		58.7		6							1.07918e+07	1.06469e+07	40353204	42838140	1.47808e+07	20385300
FALSE		High	Unambiguous	HNIICLQNDHK	[R].HNIICLQNDHK.[A]	1xCarbamidomethyl [C5]	1xCarbamidomethyl [C5]	0.00622153	0.0010893	0.827	1	2	1	O00233-1	O00233-1 [77-87]			26S proteasome non-ATPase regulatory subunit 9 [OS=Homo sapiens]	O00233-1; O00233-2	0	1391.68	11	FALSE
FALSE		High	Unambiguous	ILDKCNEIINWLDK	[K].ILDKCNEIINWLDK.[N]	1xCarbamidomethyl [C5]	1xCarbamidomethyl [C5]	0.000349437	0.0010893	1.335	1	1	42	P11142-1	P11142-1 [570-583]			Heat shock cognate 71 kDa protein [OS=Homo sapiens]	P11142-1	1	1773.92	14	FALSE	0.01	-6.64			506941		10.06		6		210499	131189	208069	206636	229728	232422							451573	456998	563110	565137
FALSE		High	Unambiguous	IQIGCHTDDLTR	[K].IQIGCHTDDLTR.[A]	1xCarbamidomethyl [C5]	1xCarbamidomethyl [C5]	0.00308432	0.0010893	0.951	1	2	9	Q9Y4C2-1	Q9Y4C2-1 [572-583]			TRPM8 channel-associated factor 1 [OS=Homo sapiens]	Q9Y4C2-1; Q9Y4C2-2	0	1428.69	12	FALSE	0.01	-6.64			1.17111e+06		17.24		6		665798	458705	404310	381369	505660	563529							1.42831e+06	1.5979e+06	1.09421e+06	1.04302e+06
FALSE		High	Unambiguous	NKYECEIQASR	[K].NKYECEIQASR.[Q]	1xCarbamidomethyl [C5]	1xCarbamidomethyl [C5]	0.000255706	0.0010893	1.39	1	2	9	Q5PSV4	Q5PSV4 [133-143]			Breast cancer metastasis-suppressor 1-like protein [OS=Homo sapiens]	Q5PSV4-2; Q5PSV4	1	1397.65	11	FALSE
FALSE		High	Unambiguous	RLDQCPESPLQR	[R].RLDQCPESPLQR.[C]	1xCarbamidomethyl [C5]	1xCarbamidomethyl [C5]	0.00257307	0.0010893	0.983	1	1	5	Q5T749	Q5T749 [387-398]			Keratinocyte proline-rich protein [OS=Homo sapiens]	Q5T749	1	1498.74	12	FALSE
FALSE		High	Unambiguous	RPYWCISR	[R].RPYWCISR.[Q]	1xCarbamidomethyl [C5]	1xCarbamidomethyl [C5]	0.00543187	0.0010893	0.851	1	1	4	Q9NSE4	Q9NSE4 [517-524]			Isoleucine--tRNA ligase, mitochondrial [OS=Homo sapiens]	Q9NSE4	0	1137.56	8	FALSE	100	6.64				135479		102.16		5								11244.1	615511	608571	72170.1	115805
FALSE		High	Unambiguous	TYFSCTSAHTSTGDGTAMITR	[R].TYFSCTSAHTSTGDGTAMITR.[A]	1xCarbamidomethyl [C5]	1xCarbamidomethyl [C5]	8.10889e-07	0.0010893	2.403	1	2	10	P31040	P31040 [262-282]			Succinate dehydrogenase [ubiquinone] flavoprotein subunit, mitochondrial [OS=Homo sapiens]	P31040-2; P31040	0	2264.99	21	FALSE	100	6.64				2.05675e+06		0.9		2									1.94902e+06	2043764
FALSE		High	Unambiguous	DISCLNRDPAR	[K].DISCLNRDPAR.[V]	1xCarbamidomethyl [C4]	1xCarbamidomethyl [C4]	0.00320902	0.0010893	0.944	1	3	12	Q3ZCQ8	Q3ZCQ8 [233-243]			Mitochondrial import inner membrane translocase subunit TIM50 [OS=Homo sapiens]	Q3ZCQ8; Q3ZCQ8-3; Q3ZCQ8-2	1	1316.64	11	FALSE	0.315	-1.67	0.120978	0.29161	2.70058e+06	851398	32.58	87.55	6	5	1.11635e+06	873048	1.50459e+06	1.47884e+06	743779	1.14927e+06		28172.6	2.24735e+06	2.20613e+06	412763	727758	2.39485e+06	3.04126e+06	4.07196e+06	4.04453e+06
FALSE		High	Unambiguous	DNVCSPGGATIHALHFLESGGFR	[K].DNVCSPGGATIHALHFLESGGFR.[S]	1xCarbamidomethyl [C4]	1xCarbamidomethyl [C4]	0.0781397	0.00514875	0.376	1	1	11	Q96C36	Q96C36 [229-251]			Pyrroline-5-carboxylate reductase 2 [OS=Homo sapiens]	Q96C36	0	2442.16	23	FALSE
FALSE		High	Unambiguous	FSSCGGGGGSFGAGGGFGSR	[R].FSSCGGGGGSFGAGGGFGSR.[S]	1xCarbamidomethyl [C4]	1xCarbamidomethyl [C4]	0.11538	0.00860454	0.303	1	1	1	KRT1	KRT1 [46-65]			Keratin, type II cytoskeletal 1 OS=Homo sapiens GN=KRT1 PE=1 SV=6	KRT1	0	1765.73	20	TRUE
FALSE		High	Unambiguous	QLLCTNEDVSSPASADQR	[R].QLLCTNEDVSSPASADQR.[IA]	1xCarbamidomethyl [C4]	1xCarbamidomethyl [C4]	0.10166	0.0064943	0.327	1	2	1	Q6P4A7-1	Q6P4A7-1 [67-84]			Sideroflexin-4 [OS=Homo sapiens]	Q6P4A7-1; Q6P4A7-2	0	1990.91	18	FALSE
FALSE		High	Unambiguous	RMECLDEMSNLEK	[R].RMECLDEMSNLEK.[Q]	1xCarbamidomethyl [C4]	1xCarbamidomethyl [C4]	0.0282385	0.00194901	0.559	1	2	5	Q5PSV4	Q5PSV4 [58-70]			Breast cancer metastasis-suppressor 1-like protein [OS=Homo sapiens]	Q5PSV4-2; Q5PSV4	1	1654.72	13	FALSE	0.01	-6.64			262952		35.88		5			29906.5	86182.8	96145.6	123808	162936								104179	233241	262952
FALSE		High	Unambiguous	TQHCDPEHFPFPAPANAPLQR	[R].TQHCDPEHFPFPAPANAPLQR.[I]	1xCarbamidomethyl [C4]	1xCarbamidomethyl [C4]	0.00138733	0.0010893	1.092	1	1	17	P10398-1	P10398-1 [189-209]			serine/threonine-protein kinase A-Raf [OS=Homo sapiens]	P10398-1	0	2430.14	21	FALSE	0.01	-6.64			278024		25.88		6		188418	107345	77584.6	107577	103370	125908							404204	373935	209972	294217
FALSE		High	Unambiguous	VHLCAAQLLQLTNLEHDVYER	[K].VHLCAAQLLQLTNLEHDVYER.[L]	1xCarbamidomethyl [C4]	1xCarbamidomethyl [C4]	1.73582e-06	0.0010893	2.269	1	3	47	Q9H0E3	Q9H0E3 [948-968]			Histone deacetylase complex subunit SAP130 [OS=Homo sapiens]	Q9H0E3; Q9H0E3-2; Q9H0E3-3	0	2522.28	21	FALSE	1.393	0.48	0.518967	0.697777	961030	1.33879e+06	46.47	84.78	5	6	437198	243650	845412	608916		460572	1.04731e+06	942665	1.25574e+06	5.03936e+06	1.09092e+06	1.14886e+06	937899	848756	2.28799e+06	1.66535e+06
FALSE		High	Unambiguous	IACDEEFSDSEDEGEGGRR	[R].IACDEEFSDSEDEGEGGRR.[N]	1xCarbamidomethyl [C3]; 1xPhospho [S8(100)]	1xCarbamidomethyl [C3]; 1xPhospho [S8(100); S10(0)]	0.0082072	0.0010893	0.778	1	2	15	Q92769	Q92769 [415-433]	Q92769 1xPhospho [S422(100); S424(0)]	Q92769 1xPhospho [S422(100)]	Histone deacetylase 2 [OS=Homo sapiens]	Q92769; Q92769-3	1	2237.83	19	FALSE	0.23	-2.12	0.00941893	0.0633816	786557	181030	32.72	55.35	5	4	378066	350494	259181	287596		239858	251304	313987		128714		76053.5	811047	1.22095e+06	701437	786557
FALSE		High	Unambiguous	FTCEMFHPNIYPDGR	[R].FTCEMFHPNIYPDGR.[V]	1xCarbamidomethyl [C3]; 1xOxidation [M5]	1xCarbamidomethyl [C3]; 1xOxidation [M5]	0.00129608	0.0010893	1.104	1	2	6	P60604	P60604 [73-87]			Ubiquitin-conjugating enzyme E2 G2 [OS=Homo sapiens]	P60604-2; P60604	0	1899.82	15	FALSE	0.01	-6.64			86997.5		109.34		5		400731	211930	22928.5	28057.2	37715.8								859669	738258	62052.6	76734.8
FALSE		High	Unambiguous	AVCMLSNTTAVAEAWAR	[R].AVCMLSNTTAVAEAWAR.[L]	1xCarbamidomethyl [C3]; 1xOxidation [M4]	1xCarbamidomethyl [C3]; 1xOxidation [M4]	0.0012386	0.0010893	1.112	1	1	1	Q9BQE3	Q9BQE3 [374-390]			Tubulin alpha-1C chain [OS=Homo sapiens]	Q9BQE3	0	1866.88	17	FALSE
FALSE		High	Unambiguous	TLCHPSFWPLYEAASGR	[R].TLCHPSFWPLYEAASGR.[G]	1xCarbamidomethyl [C3]; 1xMethyl [R17(100)]	1xCarbamidomethyl [C3]; 1xMethyl [R17(100)]	4.37134e-05	0.0010893	1.701	1	1	123	Q8TEE9	Q8TEE9 [35-51]	Q8TEE9 1xMethyl [R51(100)]	Q8TEE9 1xMethyl [R51(100)]	Histone deacetylase complex subunit SAP25 [OS=Homo sapiens]	Q8TEE9	0	2005.96	17	FALSE	0.641	-0.64	0.623894	0.781076	7.19215e+07	4.60668e+07	70.1	105.41	6	6	2.35098e+07	1.08416e+07	7.28288e+07	7.24825e+07	3.06556e+07	3.50577e+07	28605062	28721990	275724376	163430640	39020444	37685772	5.04344e+07	3.77668e+07	1.97101e+08	1.98235e+08
FALSE		High	Unambiguous	AKCELSSSVQTDINLPYLTMDSSGPK	[K].AKCELSSSVQTDINLPYLTMDSSGPK.[H]	1xCarbamidomethyl [C3]	1xCarbamidomethyl [C3]	0.111803	0.00726596	0.309	1	1	3	P38646	P38646 [315-340]			Stress-70 protein, mitochondrial [OS=Homo sapiens]	P38646	1	2841.36	26	FALSE
FALSE		High	Unambiguous	AVCMLSNTTAIAEAWAR	[R].AVCMLSNTTAIAEAWAR.[L]	1xCarbamidomethyl [C3]	1xCarbamidomethyl [C3]	7.73928e-09	0.0010893	3.222	2	11	55	Q13748-1; P68363	Q13748-1 [374-390]; P68363 [374-390]			tubulin alpha-3C/D chain [OS=Homo sapiens] Tubulin alpha-1B chain [OS=Homo sapiens]	Q13748-1; Q6PEY2; Q13748-2; Q71U36; Q9NY65; P68366-2; P68363; Q71U36-2; P68363-2; Q9NY65-2; P68366	0	1864.9	17	FALSE	3.472	1.8	2.23487e-05	0.00077708	1.81038e+06	6.28557e+06	24.48	33.17	6	6	840493	276050	611642	664630	896316	1.0389e+06	5.54227e+06	5457240	7233803	10549706	3.27339e+06	5922810	1.80307e+06	961619	1.65532e+06	1.81772e+06
FALSE		High	Unambiguous	DVCTELLPLIKPQGR	[R].DVCTELLPLIKPQGR.[V]	1xCarbamidomethyl [C3]	1xCarbamidomethyl [C3]	0.028398	0.00194901	0.558	1	1	7	P16152	P16152 [120-134]			Carbonyl reductase [NADPH] 1 [OS=Homo sapiens]	P16152	0	1738.95	15	FALSE	0.01	-6.64			42553.5		13.18		3		17584				21260.6	20393.7							37722.2
FALSE		High	Unambiguous	FICEQDHQNFLR	[K].FICEQDHQNFLR.[L]	1xCarbamidomethyl [C3]	1xCarbamidomethyl [C3]	0.00219565	0.0010893	1.011	1	4	32	Q92598	Q92598 [656-667]			Heat shock protein 105 kDa [OS=Homo sapiens]	Q92598-3; Q92598-2; Q92598-4; Q92598	0	1606.74	12	FALSE	0.721	-0.47	0.0507825	0.186395	2.45393e+06	1.76811e+06	11.98	28.16	6	6	1117407	645925	1.11983e+06	1.05892e+06	1.05824e+06	1.18227e+06	1.75158e+06	1.68605e+06	2.49449e+06	2.60585e+06	1.00357e+06	1.49973e+06	2.39712e+06	2.25008e+06	3.03065e+06	2.89608e+06
FALSE		High	Unambiguous	FTCEMFHPNIYPDGR	[R].FTCEMFHPNIYPDGR.[V]	1xCarbamidomethyl [C3]	1xCarbamidomethyl [C3]	0.000502524	0.0010893	1.271	1	2	18	P60604	P60604 [73-87]			Ubiquitin-conjugating enzyme E2 G2 [OS=Homo sapiens]	P60604-2; P60604	0	1883.82	15	FALSE	100	6.64				599002		48.32		6							422499	287711	599996	563106	730496	1.00907e+06
FALSE		High	Unambiguous	IACDEEFSDSEDEGEGGRR	[R].IACDEEFSDSEDEGEGGRR.[N]	1xCarbamidomethyl [C3]	1xCarbamidomethyl [C3]	0.00692711	0.0010893	0.808	1	2	31	Q92769	Q92769 [415-433]			Histone deacetylase 2 [OS=Homo sapiens]	Q92769; Q92769-3	1	2157.86	19	FALSE	0.339	-1.56	0.00538237	0.0438377	2.29181e+06	775907	28.54	48.44	6	6	1.05647e+06	793629	879759	847374	519724	723962	620220	916973	1339082	1422960	428817	391184	2.26638e+06	2.76461e+06	2.38094e+06	2.31752e+06
FALSE		High	Unambiguous	TLCHPSFWPLYEAASGR	[R].TLCHPSFWPLYEAASGR.[G]	1xCarbamidomethyl [C3]	1xCarbamidomethyl [C3]	2.92715e-06	0.0010893	2.177	1	1	580	Q8TEE9	Q8TEE9 [35-51]			Histone deacetylase complex subunit SAP25 [OS=Homo sapiens]	Q8TEE9	0	1991.94	17	FALSE	0.713	-0.49	0.0336464	0.148874	1.29779e+09	9.25348e+08	13.71	27.84	6	6	5.46155e+08	3.13939e+08	5.57369e+08	5.65294e+08	5.7903e+08	6.04348e+08	6.63968e+08	7.32337e+08	1024457340	1152303939	1.10527e+09	6.7275e+08	1.17164e+09	1.09361e+09	1.50844e+09	1.54604e+09
FALSE		High	Unambiguous	VDCDQHSDIAQR	[R].VDCDQHSDIAQR.[Y]	1xCarbamidomethyl [C3]	1xCarbamidomethyl [C3]	0.0204804	0.0010893	0.616	1	1	5	Q9BS26	Q9BS26 [90-101]			Endoplasmic reticulum resident protein 44 [OS=Homo sapiens]	Q9BS26	0	1443.63	12	FALSE	0.01	-6.64			329645		83.78		6		64671.9	224845	315084	312931	38766.7	51531.2							138738	783249	852729	855847
FALSE		High	Unambiguous	VCYYYDGDVGNYYYGQGHPMKPHR	[K].VCYYYDGDVGNYYYGQGHPMKPHR.[I]	1xCarbamidomethyl [C2]; 1xOxidation [M20]	1xCarbamidomethyl [C2]; 1xOxidation [M20]	0.0969074	0.0064943	0.336	1	1	1	Q13547	Q13547 [11-34]			histone deacetylase 1 [OS=Homo sapiens]	Q13547	0	2955.26	24	FALSE
FALSE		High	Unambiguous	VCISILHAPGDDPMGYESSAER	[R].VCISILHAPGDDPMGYESSAER.[W]	1xCarbamidomethyl [C2]; 1xOxidation [M14]	1xCarbamidomethyl [C2]; 1xOxidation [M14]	3.60367e-05	0.0010893	1.735	1	2	5	P60604	P60604 [88-109]			Ubiquitin-conjugating enzyme E2 G2 [OS=Homo sapiens]	P60604-2; P60604	0	2420.09	22	FALSE	0.01	-6.64			681943		13.41		2		349607	178000											749995	620065
FALSE		High	Unambiguous	DCATEEDEPPAPELHQDAAR	[R].DCATEEDEPPAPELHQDAAR.[E]	1xCarbamidomethyl [C2]	1xCarbamidomethyl [C2]	0.00594634	0.0010893	0.835	1	2	2	Q66K14-1	Q66K14-1 [1078-1097]			TBC1 domain family member 9B [OS=Homo sapiens]	Q66K14-1; Q66K14-2	0	2250.96	20	FALSE
FALSE		High	Unambiguous	DCQIAHGAAQFLR	[R].DCQIAHGAAQFLR.[E]	1xCarbamidomethyl [C2]	1xCarbamidomethyl [C2]	3.0564e-05	0.0010893	1.764	1	1	21	P30876	P30876 [1092-1104]			DNA-directed RNA polymerase II subunit RPB2 [OS=Homo sapiens]	P30876	0	1486.72	13	FALSE	0.01	-6.64			518120		18.38		6		287717	142657	152743	140538	253775	258888							617227	496945	413377	384362
FALSE		High	Unambiguous	ECREPELGLEELLR	[R].ECREPELGLEELLR.[H]	1xCarbamidomethyl [C2]	1xCarbamidomethyl [C2]	1.26726e-05	0.0010893	1.919	1	3	22	Q9NZL4-1	Q9NZL4-1 [312-325]			Hsp70-binding protein 1 [OS=Homo sapiens]	Q9NZL4-3; Q9NZL4-1; Q9NZL4-2	1	1742.87	14	FALSE	0.01	-6.64			751742		20.45		5		350421		342452	348559	279857	290191							751742		926797	953288
FALSE		High	Unambiguous	FCNTVHDIVNR	[R].FCNTVHDIVNR.[G]	1xCarbamidomethyl [C2]	1xCarbamidomethyl [C2]	0.00625681	0.0010893	0.826	1	1	6	Q9UKF6	Q9UKF6 [222-232]			Cleavage and polyadenylation specificity factor subunit 3 [OS=Homo sapiens]	Q9UKF6	0	1374.66	11	FALSE	0.01	-6.64			139825		19.89		6		62798.5	41660.4	58356.6	53912.3	41873.5	47871.6							134719	145124	157934	147447
FALSE		High	Unambiguous	HCHEAQAVLGVLLR	[R].HCHEAQAVLGVLLR.[R]	1xCarbamidomethyl [C2]	1xCarbamidomethyl [C2]	0.00463613	0.0010893	0.879	1	1	7	Q12788	Q12788 [727-740]			Transducin beta-like protein 3 [OS=Homo sapiens]	Q12788	0	1602.85	14	FALSE
FALSE		High	Unambiguous	HCHEAQAVLGVLLRR	[R].HCHEAQAVLGVLLRR.[E]	1xCarbamidomethyl [C2]	1xCarbamidomethyl [C2]	0.00143534	0.0010893	1.086	1	1	37	Q12788	Q12788 [727-741]			Transducin beta-like protein 3 [OS=Homo sapiens]	Q12788	1	1758.95	15	FALSE	0.01	-6.64			223949		59.71		6		226603	64112.5	56866.3	22260.2	97354.7	152306							486120	223336	153900	60880.3
FALSE		High	Unambiguous	KCEQVLIEK	[R].KCEQVLIEK.[H]	1xCarbamidomethyl [C2]	1xCarbamidomethyl [C2]	0.00780019	0.0010893	0.787	1	1	1	Q13616	Q13616 [290-298]			Cullin-1 [OS=Homo sapiens]	Q13616	1	1146.62	9	FALSE	100	6.64				676978		84.35		3								12541.6	682441	676978
FALSE		High	Unambiguous	LCGVEAPPRR	[R].LCGVEAPPRR.[S]	1xCarbamidomethyl [C2]	1xCarbamidomethyl [C2]	0.0559147	0.00272876	0.437	1	1	1	Q9BX95	Q9BX95 [26-35]			Sphingosine-1-phosphate phosphatase 1 [OS=Homo sapiens]	Q9BX95	1	1154.61	10	FALSE
FALSE		High	Unambiguous	ICQELTAAARPFR	[R].ICQELTAAARPFR.[R]	1xCarbamidomethyl [C2]	1xCarbamidomethyl [C2]	0.0082072	0.0010893	0.778	1	2	7	Q9BW92	Q9BW92 [184-196]			Threonine--tRNA ligase, mitochondrial [OS=Homo sapiens]	Q9BW92; Q9BW92-2	0	1532.8	13	FALSE
FALSE		High	Unambiguous	RCLYASVLTAQPR	[R].RCLYASVLTAQPR.[L]	1xCarbamidomethyl [C2]	1xCarbamidomethyl [C2]	0.0172928	0.0010893	0.646	1	1	2	P13639	P13639 [727-739]			Elongation factor 2 [OS=Homo sapiens]	P13639	1	1534.82	13	FALSE
FALSE		High	Unambiguous	RCPGGLPGHAGGAAPGR	[R].RCPGGLPGHAGGAAPGR.[G]	1xCarbamidomethyl [C2]	1xCarbamidomethyl [C2]	0.0720131	0.00434873	0.391	1	2	6	Q8N726	Q8N726 [99-115]			Tumor suppressor ARF [OS=Homo sapiens]	Q8N726-2; Q8N726	1	1587.79	17	FALSE	0.01	-6.64			53689.1		59		6		40260.5	38528.3	20237.4	19243.5	13175.1	17351.3							86369	134213	54769.7	52629.8
FALSE		High	Unambiguous	SCILRPGGSEDASAMLR	[R].SCILRPGGSEDASAMLR.[R]	1xCarbamidomethyl [C2]	1xCarbamidomethyl [C2]	0.0820442	0.00584769	0.367	1	2	1	P52888	P52888 [643-659]			thimet oligopeptidase [OS=Homo sapiens]	P52888; P52888-2	0	1819.88	17	FALSE
FALSE		High	Unambiguous	TCVHTFFDHQDQVWGVK	[R].TCVHTFFDHQDQVWGVK.[Y]	1xCarbamidomethyl [C2]	1xCarbamidomethyl [C2]	0.0481249	0.00272876	0.464	1	1	1	Q9GZS3	Q9GZS3 [265-281]			WD repeat-containing protein 61 [OS=Homo sapiens]	Q9GZS3	0	2103.97	17	FALSE
FALSE		High	Unambiguous	VCISILHAPGDDPMGYESSAER	[R].VCISILHAPGDDPMGYESSAER.[W]	1xCarbamidomethyl [C2]	1xCarbamidomethyl [C2]	5.7671e-07	0.0010893	2.463	1	2	3	P60604	P60604 [88-109]			Ubiquitin-conjugating enzyme E2 G2 [OS=Homo sapiens]	P60604-2; P60604	0	2404.09	22	FALSE
FALSE		High	Unambiguous	VCNYVNWIQQTIAAN	[K].VCNYVNWIQQTIAAN.[-]	1xCarbamidomethyl [C2]	1xCarbamidomethyl [C2]	3.90193e-05	0.0010893	1.721	1	1	7	P00761	P00761 [217-231]			Trypsin OS=Sus scrofa PE=1 SV=1	P00761	0	1793.86	15	TRUE	0.01	-6.64			212232		93.14		6		140517	42894	18604.3	20067.6	309448	328152							301444	149421	50349.9	54883.7
FALSE		High	Unambiguous	VCYYYDGDIGNYYYGQGHPMKPHR	[K].VCYYYDGDIGNYYYGQGHPMKPHR.[I]	1xCarbamidomethyl [C2]	1xCarbamidomethyl [C2]	0.0875303	0.00584769	0.355	1	1	1	Q92769	Q92769 [12-35]			Histone deacetylase 2 [OS=Homo sapiens]	Q92769	0	2953.28	24	FALSE
FALSE		High	Unambiguous	YCVQLSQIQAQISALEEQLQQIR	[R].YCVQLSQIQAQISALEEQLQQIR.[A]	1xCarbamidomethyl [C2]	1xCarbamidomethyl [C2]	3.7286e-05	0.0010893	1.729	1	1	4	KRT10	KRT10 [400-422]			Keratin, type I cytoskeletal 10 OS=Homo sapiens GN=KRT10 PE=1 SV=6	KRT10	0	2746.42	23	TRUE	100	6.64				1.76211e+06		71		5								391627	4060112	4.29452e+06	1268612	1.50621e+06
FALSE		High	Unambiguous	YCWMSTGLYIPGR	[R].YCWMSTGLYIPGR.[Q]	1xCarbamidomethyl [C2]	1xCarbamidomethyl [C2]	0.00194932	0.0010893	1.032	1	2	2	Q9Y4C2-1	Q9Y4C2-1 [542-554]			TRPM8 channel-associated factor 1 [OS=Homo sapiens]	Q9Y4C2-1; Q9Y4C2-2	0	1603.74	13	FALSE
FALSE		High	Unambiguous	MTPLAPWDPKYEAKAGPRPVWGANCSSGASFSGR	[-].MTPLAPWDPKYEAKAGPRPVWGANCSSGASFSGR.[T]	1xCarbamidomethyl [C25]; 1xOxidation [M1]; 1xGG [K10]; 1xPhospho [T/Y/S]; 1xAcetyl [K]	1xCarbamidomethyl [C25]; 1xOxidation [M1]; 1xGG [K10]; 1xPhospho [T2(50); Y11(50); S26(0); S27(0); S30(0); S32(0)]; 1xAcetyl [K10(50); K14(50)]	0.0604135	0.00272876	0.423	1	1	1	Q8TEE9	Q8TEE9 [1-34]			Histone deacetylase complex subunit SAP25 [OS=Homo sapiens]	Q8TEE9	2	3900.76	34	FALSE
FALSE		High	Unambiguous	LTTPTYGDLNHLVSATMSGVTTCLR	[K].LTTPTYGDLNHLVSATMSGVTTCLR.[F]	1xCarbamidomethyl [C23]	1xCarbamidomethyl [C23]	0.000172806	0.0010893	1.459	3	5	9	P04350; P07437; Q9BVA1	P04350 [217-241]; P07437 [217-241]; Q9BVA1 [217-241]			Tubulin beta-4A chain [OS=Homo sapiens] tubulin beta chain [OS=Homo sapiens] Tubulin beta-2B chain [OS=Homo sapiens]	Q13885; P04350; P07437; P68371; Q9BVA1	0	2708.34	25	FALSE	100	6.64				9.892e+06		22.74		6							6.07527e+06	5.96908e+06	9672655	10116571	8.01539e+06	8459338
FALSE		High	Unambiguous	HTGEKPVNAASVGKPSGGLCSSK	[K].HTGEKPVNAASVGKPSGGLCSSK.[N]	1xCarbamidomethyl [C20]; 1xMethyl [K14(99.4)]; 1xAcetyl [K5(100)]	1xCarbamidomethyl [C20]; 1xMethyl [K5(0); K14(99.4); K23(0.6)]; 1xAcetyl [K5(100); K14(0); K23(0)]	0.0656129	0.00359603	0.408	1	1	39	Q9HAH1	Q9HAH1 [392-414]	Q9HAH1 1xMethyl [K396(0); K405(99.4); K414(0.6)]; 1xAcetyl [K396(100); K405(0); K414(0)]	Q9HAH1 1xMethyl [K405(99.4)]; 1xAcetyl [K396(100)]	Zinc finger protein 556 [OS=Homo sapiens]	Q9HAH1	0	2324.17	23	FALSE	1.349	0.43	0.0171239	0.0906724	1.66243e+06	2.2427e+06	15.1	14.87	6	6	765083	410839	622178	536063	913025	904075	2106053	2.44094e+06	1.88464e+06	2.4315e+06	1350057	2.0149e+06	1.6413e+06	1.43116e+06	1.68384e+06	1.4661e+06
FALSE		High	Unambiguous	CELSSSVQTDINLPYLTMDSSGPK	[K].CELSSSVQTDINLPYLTMDSSGPK.[H]	1xCarbamidomethyl [C1]; 1xOxidation [M18]	1xCarbamidomethyl [C1]; 1xOxidation [M18]	0.000405019	0.0010893	1.309	1	1	15	P38646	P38646 [317-340]			Stress-70 protein, mitochondrial [OS=Homo sapiens]	P38646	0	2658.23	24	FALSE
FALSE		High	Unambiguous	CDGLIDSLVHYVR	[R].CDGLIDSLVHYVR.[G]	1xCarbamidomethyl [C1]	1xCarbamidomethyl [C1]	0.0162524	0.0010893	0.657	1	2	2	Q99959	Q99959 [579-591]			Plakophilin-2 [OS=Homo sapiens]	Q99959; Q99959-2	0	1546.77	13	FALSE
FALSE		High	Unambiguous	CEFQDAYVLLSEK	[K].CEFQDAYVLLSEK.[K]	1xCarbamidomethyl [C1]	1xCarbamidomethyl [C1]	0.000119461	0.0010893	1.524	1	1	20	P10809	P10809 [237-249]			60 kDa heat shock protein, mitochondrial [OS=Homo sapiens]	P10809	0	1601.75	13	FALSE
FALSE		High	Unambiguous	CELSSSVQTDINLPYLTMDSSGPK	[K].CELSSSVQTDINLPYLTMDSSGPK.[H]	1xCarbamidomethyl [C1]	1xCarbamidomethyl [C1]	0.0393496	0.00194901	0.5	1	1	4	P38646	P38646 [317-340]			Stress-70 protein, mitochondrial [OS=Homo sapiens]	P38646	0	2642.23	24	FALSE
FALSE		High	Unambiguous	CEVNGAGAHPLFAFLR	[K].CEVNGAGAHPLFAFLR.[E]	1xCarbamidomethyl [C1]	1xCarbamidomethyl [C1]	0.0386929	0.00194901	0.503	1	1	4	P07203	P07203 [115-130]			Glutathione peroxidase 1 [OS=Homo sapiens]	P07203	0	1758.87	16	FALSE	0.01	-6.64			77505.3		43.28		5			18063.6	28638.3	21839.1	65591.8	62059.3								62924.4	77505.3	59728.6
FALSE		High	Unambiguous	CLAFHDISPQAPTHFLVIPK	[R].CLAFHDISPQAPTHFLVIPK.[K]	1xCarbamidomethyl [C1]	1xCarbamidomethyl [C1]	0.00231051	0.0010893	1.002	1	1	5	P49773	P49773 [38-57]			Histidine triad nucleotide-binding protein 1 [OS=Homo sapiens]	P49773	0	2291.2	20	FALSE	100	6.64				998441		43.48		2									684248	1371871
FALSE		High	Unambiguous	CLALATHDNPLRR	[R].CLALATHDNPLRR.[E]	1xCarbamidomethyl [C1]	1xCarbamidomethyl [C1]	0.0045581	0.0010893	0.882	1	5	15	P16615	P16615 [560-572]			Sarcoplasmic/endoplasmic reticulum calcium ATPase 2 [OS=Homo sapiens]	P16615-3; P16615-2; P16615; P16615-4; P16615-5	1	1536.81	13	FALSE	0.01	-6.64			810519		7.59		6		374167	234945	309587	270166	365051	332229							802683	818432	837854	738887
FALSE		High	Unambiguous	CIHEDLLGLTFR	[R].CIHEDLLGLTFR.[I]	1xCarbamidomethyl [C1]	1xCarbamidomethyl [C1]	0.00280123	0.0010893	0.968	1	2	2	Q8IZ69	Q8IZ69 [392-403]			tRNA (uracil-5-)-methyltransferase homolog A [OS=Homo sapiens]	Q8IZ69-2; Q8IZ69	0	1473.75	12	FALSE
FALSE		High	Unambiguous	CPGGLPGHAGGAAPGR	[R].CPGGLPGHAGGAAPGR.[G]	1xCarbamidomethyl [C1]	1xCarbamidomethyl [C1]	0.00272301	0.0010893	0.973	1	2	2	Q8N726	Q8N726 [100-115]			Tumor suppressor ARF [OS=Homo sapiens]	Q8N726-2; Q8N726	0	1431.69	16	FALSE	2.027	1.02			57461.1	116484		34.02	1	2		16495.2					89956.2	142489						57461.1
FALSE		High	Unambiguous	CQASVHGASEAR	[R].CQASVHGASEAR.[L]	1xCarbamidomethyl [C1]	1xCarbamidomethyl [C1]	0.0204804	0.0010893	0.616	1	1	4	Q8NAT1	Q8NAT1 [490-501]			Protein O-linked-mannose beta-1,4-N-acetylglucosaminyltransferase 2 [OS=Homo sapiens]	Q8NAT1	0	1272.57	12	FALSE	0.01	-6.64			165549		77.17		6		36406.8	131794	130974	128305	27500.7	35654.1							78101.8	459106	354463	350907
FALSE		High	Unambiguous	CQEVISWLDANTLAEKDEFEHK	[K].CQEVISWLDANTLAEKDEFEHK.[R]	1xCarbamidomethyl [C1]	1xCarbamidomethyl [C1]	2.89409e-06	0.0010893	2.179	1	2	48	P0DMV8	P0DMV8 [574-595]			heat shock 70 kDa protein 1A [OS=Homo sapiens]	P0DMV8-2; P0DMV8	1	2662.25	22	FALSE	0.245	-2.03	0.0155492	0.0851251	1.75389e+07	4.28892e+06	39.26	67.13	6	6	6.76786e+06	4.1312e+06	1.16048e+07	1.18936e+07	7725779	8.27253e+06	369449	4.36497e+06	8746176	9643224	3.14294e+06	3.44768e+06	1.45188e+07	1.4391e+07	3.14069e+07	3.25281e+07
FALSE		High	Unambiguous	CQEVISWLDANTLAEKDEFEHKR	[K].CQEVISWLDANTLAEKDEFEHKR.[K]	1xCarbamidomethyl [C1]	1xCarbamidomethyl [C1]	2.18611e-05	0.0010893	1.823	1	2	119	P0DMV8	P0DMV8 [574-596]			heat shock 70 kDa protein 1A [OS=Homo sapiens]	P0DMV8-2; P0DMV8	2	2818.35	23	FALSE	1.291	0.37	0.348253	0.582828	2.79809e+06	3.61107e+06	42.17	48.83	6	6	1.54288e+06	679042	792700	1.43451e+06	2.23021e+06	786290	2.30109e+06	3.25486e+06	6.72228e+06	5.86688e+06	3.10838e+06	1777965	3.30987e+06	2.36544e+06	2.14533e+06	3.9233e+06
FALSE		High	Unambiguous	CQHAAEIITDLLR	[R].CQHAAEIITDLLR.[S]	1xCarbamidomethyl [C1]	1xCarbamidomethyl [C1]	0.000678874	0.0010893	1.218	1	2	19	Q96AE4	Q96AE4 [332-344]			Far upstream element-binding protein 1 [OS=Homo sapiens]	Q96AE4; Q96AE4-2	0	1539.79	13	FALSE	0.01	-6.64			133040		8.05		6		64830.6	40801.2	46750.2	44454.7	64790.3	60991.1							139078	142131	126523	121581
FALSE		High	Unambiguous	CSHVTLEPGANQITFR	[R].CSHVTLEPGANQITFR.[T]	1xCarbamidomethyl [C1]	1xCarbamidomethyl [C1]	0.0552986	0.00272876	0.439	1	1	3	P48553	P48553 [729-744]			Trafficking protein particle complex subunit 10 [OS=Homo sapiens]	P48553	0	1829.9	16	FALSE
FALSE		High	Unambiguous	CVRPAGNASFSK	[R].CVRPAGNASFSK.[R]	1xCarbamidomethyl [C1]	1xCarbamidomethyl [C1]	0.00146826	0.0010893	1.082	1	3	2	Q9HAJ7	Q9HAJ7 [38-49]			Histone deacetylase complex subunit SAP30L [OS=Homo sapiens]	Q9HAJ7-3; Q9HAJ7; Q9HAJ7-2	0	1293.64	12	FALSE	100	6.64				612152		2.55		2									586898	601226
FALSE		High	Unambiguous	CYEMASHLR	[K].CYEMASHLR.[R]	1xCarbamidomethyl [C1]	1xCarbamidomethyl [C1]	0.00111208	0.0010893	1.131	1	2	5	P07737	P07737 [128-136]			profilin-1 [OS=Homo sapiens]	P07737; PFN1	0	1166.51	9	TRUE	0.01	-6.64			160592		70.56		4				112928	117351	29294.1	40441.1									305622	320947
FALSE		High	Unambiguous	GSLLLDGAGAGGAGGSRPCSNR	[R].GSLLLDGAGAGGAGGSRPCSNR.[T]	1xCarbamidomethyl [C19]	1xCarbamidomethyl [C19]	4.47179e-05	0.0010893	1.697	1	1	8	Q96IF1	Q96IF1 [140-161]			LIM domain-containing protein ajuba [OS=Homo sapiens]	Q96IF1	0	2029.98	22	FALSE	0.01	-6.64			168613		52.39		6		77524.9	49073.6	136168	117810	50870.5	52171.5							166310	170948	368518	322204
FALSE		High	Unambiguous	VMTIPYQPMPASSPVICAGGQDR	[R].VMTIPYQPMPASSPVICAGGQDR.[C]	1xCarbamidomethyl [C17]; 2xOxidation [M2; M9]	1xCarbamidomethyl [C17]; 2xOxidation [M2; M9]	1.55825e-06	0.0010893	2.288	1	1	8	Q15365	Q15365 [178-200]			Poly(RC)-binding protein 1 [OS=Homo sapiens]	Q15365	0	2507.17	23	FALSE	0.01	-6.64			1.09138e+06		9.68		2		475049	335522											1.0191e+06	1.16879e+06
FALSE		High	Unambiguous	RLLSPAGSSGAPASPACSSPPSSEFMDVN	[R].RLLSPAGSSGAPASPACSSPPSSEFMDVN.[-]	1xCarbamidomethyl [C17]; 1xPhospho [S18(99.5)]	1xCarbamidomethyl [C17]; 1xPhospho [S4(0); S8(0); S9(0); S14(0); S18(99.5); S19(0.5); S22(0); S23(0)]	0.00167273	0.0010893	1.059	1	1	3	P51784	P51784 [935-963]	P51784 1xPhospho [S938(0); S942(0); S943(0); S948(0); S952(99.5); S953(0.5); S956(0); S957(0)]	P51784 1xPhospho [S952(99.5)]	Ubiquitin carboxyl-terminal hydrolase 11 [OS=Homo sapiens]	P51784	1	2956.29	29	FALSE
FALSE		High	Unambiguous	FLGPEDSHVVVASNSPCLK	[R].FLGPEDSHVVVASNSPCLK.[V]	1xCarbamidomethyl [C17]	1xCarbamidomethyl [C17]	0.0246672	0.00194901	0.583	1	1	4	Q12788	Q12788 [342-360]			Transducin beta-like protein 3 [OS=Homo sapiens]	Q12788	0	2056.02	19	FALSE
FALSE		High	Unambiguous	LLSPAGSSGAPASPACSSPPSSEFMDVN	[R].LLSPAGSSGAPASPACSSPPSSEFMDVN.[-]	1xCarbamidomethyl [C16]	1xCarbamidomethyl [C16]	0.030213	0.00194901	0.547	1	1	7	P51784	P51784 [936-963]			Ubiquitin carboxyl-terminal hydrolase 11 [OS=Homo sapiens]	P51784	0	2720.22	28	FALSE
FALSE		High	Unambiguous	YGDGGSSFQSTTGHCVHMR	[R].YGDGGSSFQSTTGHCVHMR.[G]	1xCarbamidomethyl [C15]; 1xOxidation [M18]; 1xMethyl [R19(100)]	1xCarbamidomethyl [C15]; 1xOxidation [M18]; 1xMethyl [R19(100)]	0.0382612	0.00194901	0.505	1	1	1	P55795	P55795 [276-294]	P55795 1xMethyl [R294(100)]	P55795 1xMethyl [R294(100)]	heterogeneous nuclear ribonucleoprotein H2 [OS=Homo sapiens]	P55795	0	2113.88	19	FALSE
FALSE		High	Unambiguous	YGDGGSTFQSTTGHCVHMR	[R].YGDGGSTFQSTTGHCVHMR.[G]	1xCarbamidomethyl [C15]; 1xOxidation [M18]	1xCarbamidomethyl [C15]; 1xOxidation [M18]	0.0497604	0.00272876	0.458	1	1	1	P31943	P31943 [276-294]			Heterogeneous nuclear ribonucleoprotein H [OS=Homo sapiens]	P31943	0	2113.88	19	FALSE	0.01	-6.64			99228.5		31.58		2		36855.8	35749.8											79065	124534
FALSE		High	Unambiguous	YGDGGSSFQSTTGHCVHMR	[R].YGDGGSSFQSTTGHCVHMR.[G]	1xCarbamidomethyl [C15]; 1xMethyl [R19(100)]	1xCarbamidomethyl [C15]; 1xMethyl [R19(100)]	0.0833852	0.00584769	0.364	1	1	1	P55795	P55795 [276-294]	P55795 1xMethyl [R294(100)]	P55795 1xMethyl [R294(100)]	heterogeneous nuclear ribonucleoprotein H2 [OS=Homo sapiens]	P55795	0	2097.89	19	FALSE
FALSE		High	Unambiguous	ERPDLPPIQYEPVLCSR	[K].ERPDLPPIQYEPVLCSR.[T]	1xCarbamidomethyl [C15]	1xCarbamidomethyl [C15]	0.0689317	0.00434873	0.399	1	1	3	Q15436	Q15436 [47-63]			protein transport protein Sec23A [OS=Homo sapiens]	Q15436	0	2069.05	17	FALSE	0.01	-6.64			62712.2		15.74		6		25403.7	15375	26054.9	26863.8	32163.3	26729.4							54497.3	53558.9	70513.9	73470.7
FALSE		High	Unambiguous	VNAQDNELSNVEFHCGR	[R].VNAQDNELSNVEFHCGR.[A]	1xCarbamidomethyl [C15]	1xCarbamidomethyl [C15]	0.134832	0.00935831	0.273	1	2	1	Q8IZ69	Q8IZ69 [472-488]			tRNA (uracil-5-)-methyltransferase homolog A [OS=Homo sapiens]	Q8IZ69-2; Q8IZ69	0	1988.89	17	FALSE
FALSE		High	Unambiguous	VTWAHPEFGQVLASCSFDR	[R].VTWAHPEFGQVLASCSFDR.[T]	1xCarbamidomethyl [C15]	1xCarbamidomethyl [C15]	0.00662079	0.0010893	0.816	1	2	5	Q96EE3-1	Q96EE3-1 [63-81]			Isoform B of Nucleoporin SEH1 [OS=Homo sapiens]	Q96EE3; Q96EE3-1	0	2207.03	19	FALSE
FALSE		High	Unambiguous	YGDGGSTFQSTTGHCVHMR	[R].YGDGGSTFQSTTGHCVHMR.[G]	1xCarbamidomethyl [C15]	1xCarbamidomethyl [C15]	0.000448593	0.0010893	1.291	1	1	4	P31943	P31943 [276-294]			Heterogeneous nuclear ribonucleoprotein H [OS=Homo sapiens]	P31943	0	2097.89	19	FALSE	0.01	-6.64			177315		38.41		5		41578.1		93175.1	75346.7	76870.7	58527.6							89195.5		252165	206068
FALSE		High	Unambiguous	AQFTAQVHHFMELCWDK	[K].AQFTAQVHHFMELCWDK.[C]	1xCarbamidomethyl [C14]; 1xOxidation [M11]	1xCarbamidomethyl [C14]; 1xOxidation [M11]	0.120308	0.00860454	0.295	1	1	2	Q9Y5J9	Q9Y5J9 [23-39]			mitochondrial import inner membrane translocase subunit Tim8 B [OS=Homo sapiens]	Q9Y5J9	0	2163.97	17	FALSE
FALSE		High	Unambiguous	AAAIGIDLGTTYSCVGVFQHGK	[K].AAAIGIDLGTTYSCVGVFQHGK.[V]	1xCarbamidomethyl [C14]	1xCarbamidomethyl [C14]	0.0989944	0.0064943	0.332	1	2	3	P0DMV8	P0DMV8 [4-25]			heat shock 70 kDa protein 1A [OS=Homo sapiens]	P0DMV8-2; P0DMV8	0	2265.13	22	FALSE
FALSE		High	Unambiguous	AQFTAQVHHFMELCWDK	[K].AQFTAQVHHFMELCWDK.[C]	1xCarbamidomethyl [C14]	1xCarbamidomethyl [C14]	0.00220812	0.0010893	1.01	1	1	51	Q9Y5J9	Q9Y5J9 [23-39]			mitochondrial import inner membrane translocase subunit Tim8 B [OS=Homo sapiens]	Q9Y5J9	0	2147.98	17	FALSE	0.01	-6.64			1.12429e+06		15.16		6		551212	227994	365949	451761	467362	561931							1.18249e+06	794218	990388	1.23554e+06
FALSE		High	Unambiguous	GPAVGIDLGTTYSCVGVFQHGK	[K].GPAVGIDLGTTYSCVGVFQHGK.[V]	1xCarbamidomethyl [C14]	1xCarbamidomethyl [C14]	2.98774e-05	0.0010893	1.768	1	2	24	P11142-1	P11142-1 [4-25]			Heat shock cognate 71 kDa protein [OS=Homo sapiens]	P11142-1; P11142-2	0	2263.12	22	FALSE	100	6.64				1.22175e+06		30.47		6							1136426	1.24082e+06	1.25746e+06	1.57845e+06	435904	900386
FALSE		High	Unambiguous	LISGVSRPDEVLECIER	[R].LISGVSRPDEVLECIER.[G]	1xCarbamidomethyl [C14]	1xCarbamidomethyl [C14]	0.00058908	0.0010893	1.243	1	4	5	Q9H974-1	Q9H974-1 [250-266]			Queuine tRNA-ribosyltransferase accessory subunit 2 [OS=Homo sapiens]	Q9H974-3; Q9H974-1; Q9H974-4; Q9H974-2	0	1972.02	17	FALSE	0.01	-6.64			731219		19.76		6		487364	213023	223161	253660	362882	345313							1.04552e+06	742065	603954	693745
FALSE		High	Unambiguous	NFEATLGWLQEHACSR	[R].NFEATLGWLQEHACSR.[T]	1xCarbamidomethyl [C14]	1xCarbamidomethyl [C14]	0.0012386	0.0010893	1.112	1	2	20	Q9P2J5	Q9P2J5 [560-575]			Leucine--tRNA ligase, cytoplasmic [OS=Homo sapiens]	Q9P2J5; Q9P2J5-2	0	1918.89	16	FALSE	0.01	-6.64			114486		46.34		6		53795.2	31965.4	92724.2	92825.2	49237.8	49379.2							115404	111352	250945	253871
FALSE		High	Unambiguous	RSVLDAAQIVGLNCLR	[R].RSVLDAAQIVGLNCLR.[L]	1xCarbamidomethyl [C14]	1xCarbamidomethyl [C14]	6.21659e-05	0.0010893	1.639	1	4	46	Q92598	Q92598 [154-169]			Heat shock protein 105 kDa [OS=Homo sapiens]	Q92598-3; Q92598-2; Q92598-4; Q92598	1	1784.98	16	FALSE	0.01	-6.64			265668		43.1		6		98953.7	115318	61420.3	58862.2	144140	213200							212281	401710	166225	160984
FALSE		High	Unambiguous	RSVMDATQIAGLNCLR	[R].RSVMDATQIAGLNCLR.[L]	1xCarbamidomethyl [C14]	1xCarbamidomethyl [C14]	9.04393e-05	0.0010893	1.573	1	1	5	P34932	P34932 [154-169]			Heat shock 70 kDa protein 4 [OS=Homo sapiens]	P34932	1	1804.92	16	FALSE
FALSE		High	Unambiguous	AIELQPHFPDAYCNLANALK	[R].AIELQPHFPDAYCNLANALK.[E]	1xCarbamidomethyl [C13]	1xCarbamidomethyl [C13]	0.0248066	0.00194901	0.582	1	3	3	O15294	O15294 [285-304]			UDP-N-acetylglucosamine--peptide N-acetylglucosaminyltransferase 110 kDa subunit [OS=Homo sapiens]	O15294; O15294-2; O15294-3	0	2285.14	20	FALSE	0.01	-6.64			1.66683e+06				1				615895												1.66683e+06
FALSE		High	Unambiguous	FSEERDPELSTVCR	[R].FSEERDPELSTVCR.[K]	1xCarbamidomethyl [C13]	1xCarbamidomethyl [C13]	0.000469434	0.0010893	1.283	1	1	9	Q8NBA8	Q8NBA8 [131-144]			DTW domain-containing protein 2 [OS=Homo sapiens]	Q8NBA8	1	1724.79	14	FALSE	0.01	-6.64			173397		25.91		6		94674.7	64819.4	69548.7	58406.8	49495.5	60634.9							203101	225798	188223	159739
FALSE		High	Unambiguous	MEEFKDQLPADECNK	[K].MEEFKDQLPADECNK.[L]	1xCarbamidomethyl [C13]	1xCarbamidomethyl [C13]	0.000193593	0.0010893	1.439	1	1	9	P38646	P38646 [596-610]			Stress-70 protein, mitochondrial [OS=Homo sapiens]	P38646	1	1853.8	15	FALSE	0.01	-6.64			181492		101.26		6		66213	32669.8	384448	370612	73210.4	93479.7							142044	113805	1.04045e+06	1.0136e+06
FALSE		High	Unambiguous	SVLDAAQIVGLNCLR	[R].SVLDAAQIVGLNCLR.[L]	1xCarbamidomethyl [C13]	1xCarbamidomethyl [C13]	8.65098e-08	0.0010893	2.797	1	4	28	Q92598	Q92598 [155-169]			Heat shock protein 105 kDa [OS=Homo sapiens]	Q92598-3; Q92598-2; Q92598-4; Q92598	0	1628.88	15	FALSE	0.367	-1.45	0.000336212	0.0049362	1.68762e+06	619688	16.87	28.16	6	5	691847	334559	700700	686925	715249	827307	607245	527533	987253		502356	586717	1.48419e+06	1.16544e+06	1.89634e+06	1.8787e+06
FALSE		High	Unambiguous	SVMDATQIAGLNCLR	[R].SVMDATQIAGLNCLR.[L]	1xCarbamidomethyl [C13]	1xCarbamidomethyl [C13]	0.0010156	0.0010893	1.147	1	1	2	P34932	P34932 [155-169]			Heat shock 70 kDa protein 4 [OS=Homo sapiens]	P34932	0	1648.81	15	FALSE	0.01	-6.64			406546		14.51		3				169662	148649		164138									459167	406546
FALSE		High	Unambiguous	FQQLVHQMTELCWEK	[R].FQQLVHQMTELCWEK.[C]	1xCarbamidomethyl [C12]; 1xOxidation [M8]	1xCarbamidomethyl [C12]; 1xOxidation [M8]	5.48635e-05	0.0010893	1.661	1	1	55	O60220	O60220 [32-46]			Mitochondrial import inner membrane translocase subunit Tim8 A [OS=Homo sapiens]	O60220	0	1992.93	15	FALSE	5.283	2.4	0.00726527	0.0521485	465958	2.46187e+06	86.46	92.07	6	6	837575	538702	187751	100055	148216	204780	9.74127e+06	11314610	1.28939e+06	1.91183e+06	2407753	1.74426e+06	1.79681e+06	1.87657e+06	508120	273646
FALSE		High	Unambiguous	WVAKSLVKGGLCR	[R].WVAKSLVKGGLCR.[R]	1xCarbamidomethyl [C12]; 1xGG [K4]; 1xAcetyl [K8(100)]	1xCarbamidomethyl [C12]; 1xGG [K4]; 1xAcetyl [K4(0); K8(100)]	0.0974254	0.0064943	0.335	1	2	3	P31153	P31153 [300-312]	P31153 1xAcetyl [K303(0); K307(100)]	P31153 1xAcetyl [K307(100)]	S-adenosylmethionine synthase isoform type-2 [OS=Homo sapiens]	P31153; P31153-2	2	1629.89	13	FALSE
FALSE		High	Unambiguous	AQYQHDTSLPHCR	[R].AQYQHDTSLPHCR.[F]	1xCarbamidomethyl [C12]	1xCarbamidomethyl [C12]	0.0208298	0.00194901	0.613	1	2	4	P18074-1	P18074-1 [144-156]			Tfiih basal transcription factor complex helicase xpd subunit [OS=Homo sapiens]	P18074-2; P18074-1	0	1612.73	13	FALSE	0.184	-2.44	0.246336	0.45728	149748	27534.1	73.81	87.72	3	5	69804.3		68070.2		8404.59			81213.3	25927	36327.3	11849.8	7481.5	149748		184222
FALSE		High	Unambiguous	FQQLVHQMTELCWEK	[R].FQQLVHQMTELCWEK.[C]	1xCarbamidomethyl [C12]	1xCarbamidomethyl [C12]	1.06137e-07	0.0010893	2.761	1	1	291	O60220	O60220 [32-46]			Mitochondrial import inner membrane translocase subunit Tim8 A [OS=Homo sapiens]	O60220	0	1976.94	15	FALSE	0.938	-0.09	0.763314	0.873252	1.75633e+07	1.64724e+07	26.17	22.1	6	6	8.78833e+06	4.6969e+06	5.15996e+06	4.95877e+06	10941371	11146264	1.44514e+07	1.39667e+07	23490941	17038052	12910091	1.57988e+07	1.88532e+07	1.63616e+07	1.39647e+07	1.35619e+07
FALSE		High	Unambiguous	LPLALPPASQGCSSGGGGGGGGGSSAGGSGNSRPPR	[R].LPLALPPASQGCSSGGGGGGGGGSSAGGSGNSRPPR.[N]	1xCarbamidomethyl [C12]	1xCarbamidomethyl [C12]	0.00692711	0.0010893	0.808	1	2	8	Q9NZL4-1	Q9NZL4-1 [11-46]			Hsp70-binding protein 1 [OS=Homo sapiens]	Q9NZL4-1; Q9NZL4-2	0	3121.48	36	FALSE	100	6.64				82925.2		91.14		2							38058.6	170688
FALSE		High	Unambiguous	MREIVHIQAGQCGNQIGAK	[-].MREIVHIQAGQCGNQIGAK.[F]	1xCarbamidomethyl [C12]	1xCarbamidomethyl [C12]	9.1677e-06	0.0010893	1.976	4	6	58	Q13509; P04350; P07437; Q9BVA1	Q13509 [1-19]; P04350 [1-19]; P07437 [1-19]; Q9BVA1 [1-19]			tubulin beta-3 chain [OS=Homo sapiens] Tubulin beta-4A chain [OS=Homo sapiens] tubulin beta chain [OS=Homo sapiens] Tubulin beta-2B chain [OS=Homo sapiens]	Q13885; Q13509; P04350; P07437; P68371; Q9BVA1	1	2110.06	19	FALSE
FALSE		High	Unambiguous	SHFEQWGTLTDCVVMR	[R].SHFEQWGTLTDCVVMR.[D]	1xCarbamidomethyl [C12]	1xCarbamidomethyl [C12]	0.00214644	0.0010893	1.015	1	4	7	P09651-1	P09651-1 [32-47]			Heterogeneous nuclear ribonucleoprotein A1 [OS=Homo sapiens]	P09651-2; Q32P51; P09651-3; P09651-1	0	1965.89	16	FALSE	100	6.64				848211		49.75		3								513300			1187529	725034
FALSE		High	Unambiguous	WDYFTEQHAFSCADGSPR	[R].WDYFTEQHAFSCADGSPR.[C]	1xCarbamidomethyl [C12]	1xCarbamidomethyl [C12]	0.000147399	0.0010893	1.487	1	2	13	Q8IZ52	Q8IZ52 [394-411]			Chondroitin sulfate synthase 2 [OS=Homo sapiens]	Q8IZ52-4; Q8IZ52	0	2173.9	18	FALSE	0.01	-6.64			112608		29.58		6		47656.4	35606.1	28686.7	32534.4	74982	61700							102235	124034	77636.6	88979.5
FALSE		High	Unambiguous	YMELYTHVYNYCTSVHQSNQAR	[R].YMELYTHVYNYCTSVHQSNQAR.[G]	1xCarbamidomethyl [C12]	1xCarbamidomethyl [C12]	0.0126788	0.0010893	0.701	1	1	11	Q13616	Q13616 [42-63]			Cullin-1 [OS=Homo sapiens]	Q13616	0	2764.22	22	FALSE
FALSE		High	Unambiguous	KAEQLMSDENCFK	[R].KAEQLMSDENCFK.[L]	1xCarbamidomethyl [C11]; 1xOxidation [M6]	1xCarbamidomethyl [C11]; 1xOxidation [M6]	5.84007e-05	0.0010893	1.65	1	1	20	Q96ST3	Q96ST3 [1053-1065]			Paired amphipathic helix protein Sin3a [OS=Homo sapiens]	Q96ST3	1	1615.71	13	FALSE	1.629	0.7	0.970151	0.979247	365082	594678	121.16	60.19	6	5	839052	773002	135413	132980	31880.3	45586.9	714927	965435	532112	594678		32901.4	1.79998e+06	2.69275e+06	366477	363692
FALSE		High	Unambiguous	AGPRPVWGANCSSGASFSGR	[K].AGPRPVWGANCSSGASFSGR.[T]	1xCarbamidomethyl [C11]; 1xMethyl [R4(100)]	1xCarbamidomethyl [C11]; 1xMethyl [R4(100); R20(0)]	1.64932e-06	0.0010893	2.278	1	1	27	Q8TEE9	Q8TEE9 [15-34]	Q8TEE9 1xMethyl [R18(100); R34(0)]	Q8TEE9 1xMethyl [R18(100)]	Histone deacetylase complex subunit SAP25 [OS=Homo sapiens]	Q8TEE9	0	2034.96	20	FALSE	0.01	-6.64			259153		58.75		6		109933	67200.1	255611	258203	112604	123919							235834	234092	691776	706168
FALSE		High	Unambiguous	AGPRPVWGANCSSGASFSGR	[K].AGPRPVWGANCSSGASFSGR.[T]	1xCarbamidomethyl [C11]	1xCarbamidomethyl [C11]	7.59155e-08	0.0010893	2.82	1	1	94	Q8TEE9	Q8TEE9 [15-34]			Histone deacetylase complex subunit SAP25 [OS=Homo sapiens]	Q8TEE9	0	2020.94	20	FALSE	0.705	-0.5	0.0815986	0.240307	1.60143e+06	1.1295e+06	29.46	45.57	6	6	727136	444968	1.0113e+06	963687	708348	752222	1.09419e+06	1.10144e+06	1.81909e+06	2.21429e+06	523306	806285	1.55989e+06	1.55005e+06	2.73693e+06	2.63563e+06
FALSE		High	Unambiguous	KAEQLMSDENCFK	[R].KAEQLMSDENCFK.[L]	1xCarbamidomethyl [C11]	1xCarbamidomethyl [C11]	1.1905e-05	0.0010893	1.93	1	1	32	Q96ST3	Q96ST3 [1053-1065]			Paired amphipathic helix protein Sin3a [OS=Homo sapiens]	Q96ST3	1	1599.71	13	FALSE	0.575	-0.8	0.39193	0.614532	2.02542e+06	1.1651e+06	74.4	83.18	6	6	332320	194672	1.78538e+06	1.71825e+06	867495	982515	405876	417491	3.25234e+06	3.31735e+06	979602	960217	712910	678140	4.83188e+06	4.69931e+06
FALSE		High	Unambiguous	LQEVPHEGPMCDLLWSDPDDR	[R].LQEVPHEGPMCDLLWSDPDDR.[G]	1xCarbamidomethyl [C11]	1xCarbamidomethyl [C11]	0.00349346	0.0010893	0.929	1	2	7	P62714	P62714 [186-206]			serine/threonine-protein phosphatase 2A catalytic subunit beta isoform [OS=Homo sapiens]	P62714; P67775	0	2509.11	21	FALSE	0.01	-6.64			549680		54.14		4				389082	305325	150857	173409									1.05299e+06	835044
FALSE		High	Unambiguous	LQEVPHEGPMCDLLWSDPDDRGGWGISPR	[R].LQEVPHEGPMCDLLWSDPDDRGGWGISPR.[G]	1xCarbamidomethyl [C11]	1xCarbamidomethyl [C11]	0.0132645	0.0010893	0.693	1	2	2	P62714	P62714 [186-214]			serine/threonine-protein phosphatase 2A catalytic subunit beta isoform [OS=Homo sapiens]	P62714; P67775	1	3319.53	29	FALSE	0.01	-6.64			339375		6.3		2						140713	170060
FALSE		High	Unambiguous	LYAQRPAGFGCQESR	[R].LYAQRPAGFGCQESR.[H]	1xCarbamidomethyl [C11]	1xCarbamidomethyl [C11]	0.00712571	0.0010893	0.803	1	1	1	Q96IF1	Q96IF1 [214-228]			LIM domain-containing protein ajuba [OS=Homo sapiens]	Q96IF1	0	1739.83	15	FALSE	0.01	-6.64			390706		51.94		3			38208.2	166488	142857										133098	450576	390706
FALSE		High	Unambiguous	NAASTLTERPCYNR	[R].NAASTLTERPCYNR.[R]	1xCarbamidomethyl [C11]	1xCarbamidomethyl [C11]	0.111803	0.00726596	0.309	1	1	3	Q6AI12	Q6AI12 [348-361]			Ankyrin repeat domain-containing protein 40 [OS=Homo sapiens]	Q6AI12	0	1652.78	14	FALSE	0.01	-6.64			64495		47.54		5			18514.4	27979.6	28785.6	10097.4	14598.5								64495	75722.6	78726.8
FALSE		High	Unambiguous	SRGSGGLGGACGGAGFGSR	[R].SRGSGGLGGACGGAGFGSR.[S]	1xCarbamidomethyl [C11]	1xCarbamidomethyl [C11]	5.2961e-07	0.0010893	2.478	1	3	26	KRT6B	KRT6B [41-59]			Keratin, type II cytoskeletal 6B OS=Homo sapiens GN=KRT6B PE=1 SV=5	KRT6B; KRT6A; KRT6C	1	1667.77	19	TRUE	0.251	-2	0.0738485	0.227172	325713	81625.3	52.52	91.03	6	4	109752	109668	68818.9	101538	247174	341146			37458.3	25968	135776	227170	235446	382027	186248	277700
FALSE		High	Unambiguous	TVPFLPLLGGCIDDTILSR	[R].TVPFLPLLGGCIDDTILSR.[Q]	1xCarbamidomethyl [C11]	1xCarbamidomethyl [C11]	0.00771252	0.0010893	0.789	1	2	2	Q7Z7H8	Q7Z7H8 [170-188]			39S ribosomal protein L10, mitochondrial [OS=Homo sapiens]	Q7Z7H8-2; Q7Z7H8	0	2087.12	19	FALSE	0.01	-6.64			139782		14.43		6		76401.5	46189.1	40096.8	49504.9	62563.5	64052.4							163900	160900	108516	135393
FALSE		High	Unambiguous	EIVHIQAGQCGNQIGAK	[R].EIVHIQAGQCGNQIGAK.[F]	1xCarbamidomethyl [C10]; 1xMethyl [K17(100)]	1xCarbamidomethyl [C10]; 1xMethyl [K17(100)]	0.0667021	0.00359603	0.405	4	6	8	Q13509; P04350; P07437; Q9BVA1	Q13509 [3-19]; P04350 [3-19]; P07437 [3-19]; Q9BVA1 [3-19]	Q13509 1xMethyl [K19(100)]; P04350 1xMethyl [K19(100)]; P07437 1xMethyl [K19(100)]; Q9BVA1 1xMethyl [K19(100)]	Q13509 1xMethyl [K19(100)]; P04350 1xMethyl [K19(100)]; P07437 1xMethyl [K19(100)]; Q9BVA1 1xMethyl [K19(100)]	tubulin beta-3 chain [OS=Homo sapiens] Tubulin beta-4A chain [OS=Homo sapiens] tubulin beta chain [OS=Homo sapiens] Tubulin beta-2B chain [OS=Homo sapiens]	Q13885; Q13509; P04350; P07437; P68371; Q9BVA1	0	1836.94	17	FALSE	0.01	-6.64			141640		17.83		6		57056.4	37876.1	56183	47878.6	82150.8	83312.2							122400	131941	152051	130945
FALSE		High	Unambiguous	AAHTEDINACTLTTSPR	[R].AAHTEDINACTLTTSPR.[L]	1xCarbamidomethyl [C10]	1xCarbamidomethyl [C10]	0.0106428	0.0010893	0.732	1	2	9	P04049	P04049 [628-644]			RAF proto-oncogene serine/threonine-protein kinase [OS=Homo sapiens]	P04049; P04049-2	0	1857.88	17	FALSE
FALSE		High	Unambiguous	EIVHIQAGQCGNQIGAK	[R].EIVHIQAGQCGNQIGAK.[F]	1xCarbamidomethyl [C10]	1xCarbamidomethyl [C10]	2.70012e-08	0.0010893	3.002	4	6	192	Q13509; P04350; P07437; Q9BVA1	Q13509 [3-19]; P04350 [3-19]; P07437 [3-19]; Q9BVA1 [3-19]			tubulin beta-3 chain [OS=Homo sapiens] Tubulin beta-4A chain [OS=Homo sapiens] tubulin beta chain [OS=Homo sapiens] Tubulin beta-2B chain [OS=Homo sapiens]	Q13885; Q13509; P04350; P07437; P68371; Q9BVA1	0	1822.92	17	FALSE	0.503	-0.99	0.00075946	0.00943483	1.42187e+07	7.15812e+06	25.11	12.79	6	4	4.61884e+06	2.87925e+06	5.37487e+06	5.0818e+06	7.78249e+06	8.45912e+06			7.3613e+06	7202264	4629599	6.08111e+06	9.90857e+06	1.00299e+07	1.45463e+07	1.38984e+07
FALSE		High	Unambiguous	EIVHIQAGQCGNQIGTK	[R].EIVHIQAGQCGNQIGTK.[F]	1xCarbamidomethyl [C10]	1xCarbamidomethyl [C10]	0.00816095	0.0010893	0.779	1	1	9	Q9BUF5	Q9BUF5 [3-19]			Tubulin beta-6 chain [OS=Homo sapiens]	Q9BUF5	0	1852.93	17	FALSE	0.01	-6.64			138545		6.89		6		64280.7	43707.9	54960.6	50895.3	54195.6	65652.5							137898	152257	148743	139195
FALSE		High	Unambiguous	YEHASFIPSCTPDR	[R].YEHASFIPSCTPDR.[I]	1xCarbamidomethyl [C10]	1xCarbamidomethyl [C10]	0.110633	0.0064943	0.311	1	1	2	Q7Z6M1-1	Q7Z6M1-1 [87-100]			Rab9 effector protein with Kelch motifs [OS=Homo sapiens]	Q7Z6M1-1	0	1679.75	14	FALSE	0.01	-6.64			73559.1		33.25		4				37062.9	35429.1	23126.2	26762.4									100305	96896.5
FALSE		High	Unambiguous	LIGDAAKNQVALNPQNTVFDAK	[R].LIGDAAKNQVALNPQNTVFDAK.[R]	1xAcetyl [K7(100)]	1xAcetyl [K7(100); K22(0)]	0.122203	0.00860454	0.292	1	2	3	P0DMV8	P0DMV8 [50-71]	P0DMV8 1xAcetyl [K56(100); K71(0)]	P0DMV8 1xAcetyl [K56(100)]	heat shock 70 kDa protein 1A [OS=Homo sapiens]	P0DMV8-2; P0DMV8	1	2369.25	22	FALSE
FALSE		High	Unambiguous	KGSFGLPGQGDFLR	[R].KGSFGLPGQGDFLR.[S]	1xAcetyl [K1(100)]	1xAcetyl [K1(100)]	0.0172928	0.0010893	0.646	1	3	22	Q9BZ72	Q9BZ72 [1275-1288]	Q9BZ72 1xAcetyl [K1275(100)]	Q9BZ72 1xAcetyl [K1275(100)]	Membrane-associated phosphatidylinositol transfer protein 2 [OS=Homo sapiens]	Q9BZ72-2; Q9BZ72; Q9BZ72-3	1	1520.79	14	FALSE	1.059	0.08	0.97842	0.981458	1.31194e+07	1.38985e+07	66.17	58.31	6	6	11648027	3.85643e+06	1.21514e+06	1.34994e+06	5.55448e+06	9364677	17696116	19569962	3519221	3562163	12196875	10974361	2.4988e+07	1.34339e+07	3.28859e+06	3.69199e+06
FALSE		High	Unambiguous	AAAAPGASPSPGGDAAWSEAGPGPRPLAR	[R].AAAAPGASPSPGGDAAWSEAGPGPRPLAR.[S]			0.00443094	0.0010893	0.887	1	3	23	P52701	P52701 [34-62]			DNA mismatch repair protein MSH6 [OS=Homo sapiens]	P52701-2; P52701-3; P52701	0	2642.31	29	FALSE	0.01	-6.64			1.49681e+06		25.25		6		861831	525298	387211	370171	687740	676843							1.84884e+06	1.82987e+06	1.04793e+06	1.01239e+06
FALSE		High	Unambiguous	AADEEAFEDNSEEYIRR	[R].AADEEAFEDNSEEYIRR.[D]			0.00227157	0.0010893	1.005	1	3	13	P55060-1	P55060-1 [356-372]			Exportin-2 [OS=Homo sapiens]	P55060-4; P55060-3; P55060-1	1	2043.89	17	FALSE	0.01	-6.64			404393		34.16		4		201793		64851.8		167188	203226							432897		175512
FALSE		High	Unambiguous	AAEEAFVNDIDESSPGTEWER	[R].AAEEAFVNDIDESSPGTEWER.[V]			0.000126443	0.0010893	1.514	1	2	7	P09496-2	P09496-2 [163-183]			Isoform Non-brain of Clathrin light chain A [OS=Homo sapiens]	P09496-2; P09496-5	0	2352.03	21	FALSE
FALSE		High	Unambiguous	AAHSEGNTTAGLDMR	[R].AAHSEGNTTAGLDMR.[E]			0.000139261	0.0010893	1.497	1	2	23	P78371-1	P78371-1 [467-481]			T-complex protein 1 subunit beta [OS=Homo sapiens]	P78371-2; P78371-1	0	1530.7	15	FALSE	0.01	-6.64			202397		93.34		6		39860.9	38086.9	323060	301319	90697.7	93839.9							85511.7	132676	874315	824088
FALSE		High	Unambiguous	AAISSGIEDPVPTLHLTER	[R].AAISSGIEDPVPTLHLTER.[D]			0.000369851	0.0010893	1.325	1	3	24	O75175	O75175 [550-568]			CCR4-NOT transcription complex subunit 3 [OS=Homo sapiens]	O75175-3; O75175; O75175-2	0	2006.06	19	FALSE	0.01	-6.64			394888		82.53		6		80070.9	48200.5	484275	384434	231118	140182							171772	167906	1.31062e+06	1.0514e+06
FALSE		High	Unambiguous	AAPGAGDAAAGSGAEFAGGDGAAR	[R].AAPGAGDAAAGSGAEFAGGDGAAR.[G]			0.0263927	0.00194901	0.571	1	3	1	Q5K4L6-1	Q5K4L6-1 [180-203]			Long-chain fatty acid transport protein 3 [OS=Homo sapiens]	Q5K4L6-2; Q5K4L6-1; Q5K4L6-3	0	1974.89	24	FALSE
FALSE		High	Unambiguous	AAWEVDSGRR	[R].AAWEVDSGRR.[N]			0.104391	0.0064943	0.322	1	2	1	P11310-1	P11310-1 [340-349]			medium-chain specific acyl-CoA dehydrogenase, mitochondrial [OS=Homo sapiens]	P11310-2; P11310-1	1	1146.57	10	FALSE
FALSE		High	Unambiguous	ADLRDNYSPGWK	[R].ADLRDNYSPGWK.[F]			0.0220377	0.00194901	0.603	1	1	9	P07814	P07814 [1343-1354]			Bifunctional glutamate/proline--tRNA ligase [OS=Homo sapiens]	P07814	1	1421.68	12	FALSE	0.973	-0.04	0.511459	0.697777	242859	236399	69.17	41.13	6	5	145162	93970.8	10139.7	9985.74	97638.1	125506	254982	276368	83975.1		116714	202069	311410	327347	27441.6	27310.4
FALSE		High	Unambiguous	ADSGYLFSGSRPPSQVSR	[R].ADSGYLFSGSRPPSQVSR.[S]			0.000167017	0.0010893	1.465	1	1	7	Q5SNT2-1	Q5SNT2-1 [464-481]			Transmembrane protein 201 [OS=Homo sapiens]	Q5SNT2-1	0	1910.94	18	FALSE	0.01	-6.64			176350		44.73		6		89576.7	49217.5	24693.2	20555.4	78637.8	93159.1							192165	171449	66828.5	56217.9
FALSE		High	Unambiguous	ADSIHNTYSTDHASAAPPSVTR	[R].ADSIHNTYSTDHASAAPPSVTR.[S]			0.0728033	0.00434873	0.389	1	3	9	Q9UN30	Q9UN30 [216-237]			Sex comb on midleg-like protein 1 [OS=Homo sapiens]	Q9UN30; Q9UN30-1; Q9UN30-2	0	2298.07	22	FALSE	0.01	-6.64			52916.8		65.09		6		66874.8	38399.2	15061.6	11514.8	18347.7	31708.9							143463	133763	40762	31492.3
FALSE		High	Unambiguous	AEAESLYQSKYEELQITAGR	[K].AEAESLYQSKYEELQITAGR.[H]			0.0386929	0.00194901	0.503	1	1	2	KRT1	KRT1 [367-386]			Keratin, type II cytoskeletal 1 OS=Homo sapiens GN=KRT1 PE=1 SV=6	KRT1	1	2286.12	20	TRUE
FALSE		High	Unambiguous	AEALSTDHGEGFQR	[R].AEALSTDHGEGFQR.[L]			0.00555617	0.0010893	0.847	1	2	5	Q9UQ49	Q9UQ49 [252-265]			Sialidase-3 [OS=Homo sapiens]	Q9UQ49; Q9UQ49-2	0	1517.7	14	FALSE	0.01	-6.64			237080				1		110514												237080
FALSE		High	Unambiguous	AEGYEVAHGGR	[K].AEGYEVAHGGR.[C]			0.00611688	0.0010893	0.83	1	1	3	P53041	P53041 [431-441]			Serine/threonine-protein phosphatase 5 [OS=Homo sapiens]	P53041	0	1145.53	11	FALSE
FALSE		High	Unambiguous	AFHNEAQVNPER	[R].AFHNEAQVNPER.[K]			0.000298075	0.0010893	1.363	1	1	9	P17987	P17987 [469-480]			T-complex protein 1 subunit alpha [OS=Homo sapiens]	P17987	0	1411.67	12	FALSE	0.772	-0.37	0.552067	0.711141	649466	501112	71.48	99.58	6	4	181337	242348	644594	647053	144535	239452			1.54288e+06	1616668	69806.4	132771	389013	844219	1.7445e+06	1.76965e+06
FALSE		High	Unambiguous	AFREEFGAEPELAVSAPGR	[R].AFREEFGAEPELAVSAPGR.[V]			0.00187351	0.0010893	1.039	1	2	21	P51570	P51570 [19-37]			galactokinase [OS=Homo sapiens]	P51570; P51570-2	1	2033.01	19	FALSE	2.096	1.07	8.72919e-05	0.0017622	499728	1.04718e+06	22.47	19.17	6	6	337864	130182	172956	141910	246545	255687	1.36769e+06	1260829	922566	1.01921e+06	673305	919675	724804	453487	468079	388115
FALSE		High	Unambiguous	AFVHWYVGEGMEEGEFSEAR	[R].AFVHWYVGEGMEEGEFSEAR.[E]			3.87512e-07	0.0010893	2.533	3	10	150	Q13748-1; P68363; Q9BQE3	Q13748-1 [403-422]; P68363 [403-422]; Q9BQE3 [403-422]			tubulin alpha-3C/D chain [OS=Homo sapiens] Tubulin alpha-1B chain [OS=Homo sapiens] Tubulin alpha-1C chain [OS=Homo sapiens]	Q13748-1; Q71U36; Q9NY65; P68366-2; P68363; Q71U36-2; Q9BQE3; P68363-2; Q9NY65-2; P68366	0	2330.02	20	FALSE	0.01	-6.64			1.93258e+06		98.69		6		577250	293218	2.73625e+06	3.79851e+06	779796	995109							1.23835e+06	1.02142e+06	7.40528e+06	1.03887e+07
FALSE		High	Unambiguous	AFYPEEISSMVLTK	[K].AFYPEEISSMVLTK.[ML]			5.38711e-07	0.0010893	2.475	2	2	19	P0DMV8; P34931	P0DMV8 [113-126]; P34931 [115-128]			heat shock 70 kDa protein 1A [OS=Homo sapiens] Heat shock 70 kDa protein 1-like [OS=Homo sapiens]	P0DMV8; P34931	0	1614.81	14	FALSE	1.044	0.06	0.822125	0.906532	6.13427e+06	6.40688e+06	41.91	39.44	6	6	1.4395e+06	707736	2.20495e+06	2.30566e+06	3.47239e+06	3770186	3162191	2.89051e+06	7.68399e+06	8.15158e+06	4715343	6.03216e+06	3.0881e+06	2.4654e+06	5.96738e+06	6.30583e+06
FALSE		High	Unambiguous	AGLESSEGGGGPERPGAR	[R].AGLESSEGGGGPERPGAR.[G]			0.110633	0.0064943	0.311	1	2	1	Q86SK9-1	Q86SK9-1 [22-39]			stearoyl-CoA desaturase 5 [OS=Homo sapiens]	Q86SK9-1; Q86SK9-2	0	1683.8	18	FALSE
FALSE		High	Unambiguous	AHFPLDVQWNDLDYMDSR	[R].AHFPLDVQWNDLDYMDSR.[R]			5.18342e-05	0.0010893	1.671	1	1	4	P10253	P10253 [394-411]			lysosomal alpha-glucosidase [OS=Homo sapiens]	P10253	0	2222	18	FALSE
FALSE		High	Unambiguous	AHSGAAPWQPLAAPSGASAQAAEQLQR	[R].AHSGAAPWQPLAAPSGASAQAAEQLQR.[G]			1.19996e-06	0.0010893	2.334	1	4	4	P51617	P51617 [554-580]			interleukin-1 receptor-associated kinase 1 [OS=Homo sapiens]	P51617-3; P51617-4; P51617; P51617-2	0	2671.33	27	FALSE
FALSE		High	Unambiguous	AHSPMIAVGSDDSSPNAMAK	[R].AHSPMIAVGSDDSSPNAMAK.[V]			0.0126788	0.0010893	0.701	1	2	3	Q96EE3-1	Q96EE3-1 [177-196]			Isoform B of Nucleoporin SEH1 [OS=Homo sapiens]	Q96EE3; Q96EE3-1	0	1985.91	20	FALSE
FALSE		High	Unambiguous	AKFEELNMDLFR	[R].AKFEELNMDLFR.[S]			1.28904e-05	0.0010893	1.916	1	1	4	P11021	P11021 [325-336]			78 kDa glucose-regulated protein [OS=Homo sapiens]	P11021	1	1512.75	12	FALSE	100	6.64				1.07811e+06		55.68		4							157075			1.00388e+06	992397	989694
FALSE		High	Unambiguous	AIEALHGHELRPGR	[R].AIEALHGHELRPGR.[A]			0.0326902	0.00194901	0.533	1	5	2	Q96PK6-1	Q96PK6-1 [51-64]			RNA-binding protein 14 [OS=Homo sapiens]	Q96PK6-4; Q96PK6-2; Q96PK6-1; Q96PK6-3; Q96PK6-5	0	1555.85	14	FALSE
FALSE		High	Unambiguous	ALESDMAPVLIMATNR	[R].ALESDMAPVLIMATNR.[G]			0.00200534	0.0010893	1.027	1	2	5	Q9Y230	Q9Y230 [315-330]			RuvB-like 2 [OS=Homo sapiens]	Q9Y230; Q9Y230-2	0	1731.88	16	FALSE
FALSE		High	Unambiguous	ALGLAISLDRPHTVLTVIQAIR	[R].ALGLAISLDRPHTVLTVIQAIR.[R]			0.00124564	0.0010893	1.111	1	1	10	Q12788	Q12788 [669-690]			Transducin beta-like protein 3 [OS=Homo sapiens]	Q12788	0	2357.4	22	FALSE	0.01	-6.64			1.40763e+06		16.98		6		727725	481657	487275	533241	430547	651126							1.56115e+06	1.67785e+06	1.31874e+06	1.45838e+06
FALSE		High	Unambiguous	AIGTDEDLAHSSIR	[R].AIGTDEDLAHSSIR.[F]			0.0369939	0.00194901	0.511	1	3	2	Q9Y697	Q9Y697 [394-407]			Cysteine desulfurase, mitochondrial [OS=Homo sapiens]	Q9Y697-2; Q9Y697; Q9Y697-3	0	1484.73	14	FALSE	0.01	-6.64			468787		19.82		6		259985	187398	175856	168835	167383	201581							557733	652802	475928	461753
FALSE		High	Unambiguous	ALLAANEEEDREIR	[R].ALLAANEEEDREIR.[K]			0.0667021	0.00359603	0.405	1	1	3	Q5C9Z4	Q5C9Z4 [174-187]			nucleolar MIF4G domain-containing protein 1 [OS=Homo sapiens]	Q5C9Z4	1	1628.82	14	FALSE
FALSE		High	Unambiguous	ALLLAQWAWQEGSVTR	[R].ALLLAQWAWQEGSVTR.[L]			2.23363e-07	0.0010893	2.63	1	1	12	Q12788	Q12788 [87-102]			Transducin beta-like protein 3 [OS=Homo sapiens]	Q12788	0	1828.97	16	FALSE	0.01	-6.64			356563		37.39		6		167645	25958.5	100970	137224	153256	193096							359641	90426.5	273261	375300
FALSE		High	Unambiguous	AILVDLEPGTMDSVR	[R].AILVDLEPGTMDSVR.[S]			1.2846e-06	0.0010893	2.322	3	4	66	Q13509; P07437; Q9BVA1	Q13509 [63-77]; P07437 [63-77]; Q9BVA1 [63-77]			tubulin beta-3 chain [OS=Homo sapiens] tubulin beta chain [OS=Homo sapiens] Tubulin beta-2B chain [OS=Homo sapiens]	Q13885; Q13509; P07437; Q9BVA1	0	1615.84	15	FALSE	1.002	0	0.891793	0.950657	9.0923e+06	9.11348e+06	58.67	60.93	6	6	6262355	1463204	2194631	2.25001e+06	8.63759e+06	9.0985e+06	4.7472e+06	9.62041e+06	1.29986e+07	5662341	1.83999e+07	7062949	1.34343e+07	5.09707e+06	5.93945e+06	6.15363e+06
FALSE		High	Unambiguous	ALTHIDHSLSR	[R].ALTHIDHSLSR.[Q]			0.00284923	0.0010893	0.965	1	2	8	P56192	P56192 [120-130]			Methionine--tRNA ligase, cytoplasmic [OS=Homo sapiens]	P56192; P56192-2	0	1249.66	11	FALSE	0.557	-0.84	0.598617	0.755286	591173	329193	71.14	59.56	6	6	8731.42	14851.6	231212	206722	267985	296855	520104	675867	158769	205654	148674	470128	18731.1	51735.5	625741	565373
FALSE		High	Unambiguous	ALTVPELTQQMFDAK	[R].ALTVPELTQQMFDAK.[N]			0.00137169	0.0010893	1.094	2	4	12	Q13509; P04350	Q13509 [283-297]; P04350 [283-297]			tubulin beta-3 chain [OS=Homo sapiens] Tubulin beta-4A chain [OS=Homo sapiens]	Q13509; P04350; Q13509-2; P68371	0	1691.87	15	FALSE	0.95	-0.07	0.339328	0.570849	600279	570014	37.92	28.26	5	6	279818	129579	204162		472643	457738	404771	403548	449662	680404	553459	684543	600279	451390	552535
FALSE		High	Unambiguous	ALTVPELTQQMFDAR	[R].ALTVPELTQQMFDAR.[N]			2.43227e-07	0.0010893	2.615	1	1	13	Q9BUF5	Q9BUF5 [283-297]			Tubulin beta-6 chain [OS=Homo sapiens]	Q9BUF5	0	1719.87	15	FALSE	0.01	-6.64			1.29416e+06		34.33		6		609859	300183	473022	449100	955825	1.0839e+06							1.3083e+06	1.04569e+06	1.28017e+06	1.22826e+06
FALSE		High	Unambiguous	ALTVPELTQQMFDSK	[R].ALTVPELTQQMFDSK.[N]			0.000343536	0.0010893	1.338	1	2	5	Q9BVA1	Q9BVA1 [283-297]			Tubulin beta-2B chain [OS=Homo sapiens]	Q13885; Q9BVA1	0	1707.86	15	FALSE
FALSE		High	Unambiguous	ALTVPELTQQVFDAK	[R].ALTVPELTQQVFDAK.[N]			8.15508e-07	0.0010893	2.402	1	1	59	P07437	P07437 [283-297]			tubulin beta chain [OS=Homo sapiens]	P07437	0	1659.9	15	FALSE	0.404	-1.31	6.07402e-05	0.00150916	6.38722e+06	2.58096e+06	22.31	17.44	6	6	3.41793e+06	1.9237e+06	1.56347e+06	1.57761e+06	2.8989e+06	2.92393e+06	3032239	2.70747e+06	1.80589e+06	2.10925e+06	2.00618e+06	2.30084e+06	7.33231e+06	6.70122e+06	4.23132e+06	4.31466e+06
FALSE		High	Unambiguous	ALYAIPGLDYVSHEDILPYTSTDQVPIQHELFER	[R].ALYAIPGLDYVSHEDILPYTSTDQVPIQHELFER.[F]			9.73699e-05	0.0010893	1.56	1	1	37	Q9Y2S7	Q9Y2S7 [166-199]			Polymerase delta-interacting protein 2 [OS=Homo sapiens]	Q9Y2S7	0	3929.96	34	FALSE	6.839	2.77	6.24528e-06	0.000288175	4.22683e+06	2.89092e+07	24.21	49.91	6	6	1.98686e+06	752428	1.01705e+06	1.55117e+06	2.1319e+06	2.01828e+06	22352938	22703878	44677852	69423930	2.0237e+07	2.86166e+07	4.26232e+06	2.62108e+06	2.75251e+06	4.24236e+06
FALSE		High	Unambiguous	ALYDAELSQMQTHISDTSVVLSMDNNR	[R].ALYDAELSQMQTHISDTSVVLSMDNNR.[N]			0.101122	0.0064943	0.328	1	3	1	KRT6B	KRT6B [300-326]			Keratin, type II cytoskeletal 6B OS=Homo sapiens GN=KRT6B PE=1 SV=5	KRT6B; KRT6A; KRT6C	0	3038.42	27	TRUE
FALSE		High	Unambiguous	AMTKDNNLLGR	[R].AMTKDNNLLGR.[F]			0.00131086	0.0010893	1.102	3	4	16	P17066; P0DMV8; P34931	P17066 [450-460]; P0DMV8 [448-458]; P34931 [450-460]			Heat shock 70 kDa protein 6 [OS=Homo sapiens] heat shock 70 kDa protein 1A [OS=Homo sapiens] Heat shock 70 kDa protein 1-like [OS=Homo sapiens]	P17066; P0DMV8-2; P0DMV8; P34931	1	1232.64	11	FALSE	0.182	-2.46	0.153561	0.339728	1.06208e+06	193492	86.91	150.12	6	5	439235	323921	369384	342132	1.77221e+06	2.52328e+06		34257.1	79878.7	193492	1.25504e+06	3.84553e+06	942270	1.12838e+06	999685	935711
FALSE		High	Unambiguous	ANEHQGIGFLNDPR	[R].ANEHQGIGFLNDPR.[R]			0.0974254	0.0064943	0.335	1	2	3	Q92900	Q92900 [855-868]			Regulator of nonsense transcripts 1 [OS=Homo sapiens]	Q92900-2; Q92900	0	1567.76	14	FALSE
FALSE		High	Unambiguous	ANHFFTVTDPR	[R].ANHFFTVTDPR.[N]			0.00407033	0.0010893	0.902	1	1	17	Q9H9B4	Q9H9B4 [25-35]			Sideroflexin-1 [OS=Homo sapiens]	Q9H9B4	0	1304.64	11	FALSE	1.127	0.17	0.227568	0.445533	717968	809328	16.7	23.08	6	6	359229	212485	192587	196860	328009	333754	826648	865683	550742	588217	852904	668512	770638	740191	521210	538400
FALSE		High	Unambiguous	APFYRPLAPELR	[R].APFYRPLAPELR.[A]			0.0259504	0.00194901	0.574	1	1	7	A6NED2	A6NED2 [148-159]			RCC1 domain-containing protein 1 [OS=Homo sapiens]	A6NED2	0	1429.8	12	FALSE	1.586	0.67	0.641175	0.798707	441277	699726	22.51	52.64	6	6	227947	114312	210644	114896	214336	167057	824463	852352	254143	152839	497492	681967	489005	398207	570078	314233
FALSE		High	Unambiguous	APGFAHLAGLDK	[K].APGFAHLAGLDK.[M]			0.053489	0.00272876	0.445	1	2	2	O75306-1	O75306-1 [426-437]			NADH dehydrogenase [ubiquinone] iron-sulfur protein 2, mitochondrial [OS=Homo sapiens]	O75306-1; O75306-2	0	1196.64	12	FALSE
FALSE		High	Unambiguous	APNNFTIQNQYPR	[R].APNNFTIQNQYPR.[L]			4.92511e-05	0.0010893	1.68	1	1	7	Q86TG7-1	Q86TG7-1 [599-611]			Retrotransposon-derived protein PEG10 [OS=Homo sapiens]	Q86TG7-1	0	1562.77	13	FALSE	100	6.64				432621		27.81		4							462729	549453			233323	341246
FALSE		High	Unambiguous	APRPGSFFTR	[R].APRPGSFFTR.[Y]			0.0494842	0.00272876	0.459	1	1	2	Q8IWF2	Q8IWF2 [62-71]			FAD-dependent oxidoreductase domain-containing protein 2 [OS=Homo sapiens]	Q8IWF2	0	1135.6	10	FALSE
FALSE		High	Unambiguous	AQFEGIVTDLIR	[R].AQFEGIVTDLIR.[R]			2.97746e-06	0.0010893	2.174	1	1	140	P38646	P38646 [349-360]			Stress-70 protein, mitochondrial [OS=Homo sapiens]	P38646	0	1361.74	12	FALSE	0.399	-1.32	0.118244	0.29036	3.42571e+07	1.36791e+07	16.6	79.36	6	6	1.53536e+07	8.17031e+06	1.12191e+07	1.62433e+07	1.66413e+07	1.70755e+07	13109272	10296835	53824002	43027972	11420946	10438865	3.29374e+07	2.84613e+07	3.03629e+07	4.44246e+07
FALSE		High	Unambiguous	AQFEGIVTDLIRR	[R].AQFEGIVTDLIRR.[T]			0.00608239	0.0010893	0.831	1	1	62	P38646	P38646 [349-361]			Stress-70 protein, mitochondrial [OS=Homo sapiens]	P38646	1	1517.84	13	FALSE	0.814	-0.3	0.929307	0.972272	3.6942e+07	3.00663e+07	68.9	67.66	6	6	2.18484e+07	1.17568e+07	1.46534e+06	1.30193e+06	1.8046e+07	1.59697e+07	39505336	40060100	3.69813e+06	4.36606e+06	25844516	24237290	4.68703e+07	4.09547e+07	3.96572e+06	3.56069e+06
FALSE		High	Unambiguous	AQIHDLVLVGGSTR	[K].AQIHDLVLVGGSTR.[I]			6.23049e-06	0.0010893	2.044	1	2	656	P0DMV8	P0DMV8 [329-342]			heat shock 70 kDa protein 1A [OS=Homo sapiens]	P0DMV8-2; P0DMV8	0	1465.81	14	FALSE	1.367	0.45	0.0101684	0.0670286	1.59032e+08	2.17443e+08	12.56	18.88	6	6	6.37312e+07	33847370	6.03759e+07	5.90659e+07	7.14018e+07	7.50313e+07	1.8931e+08	1.3875e+08	2.28534e+08	2.45256e+08	1.60185e+08	2.04534e+08	1.3672e+08	1.17907e+08	1.63399e+08	1.61542e+08
FALSE		High	Unambiguous	ARFEELNADLFR	[R].ARFEELNADLFR.[G]			3.71577e-06	0.0010893	2.135	2	3	427	P54652; P11142-1	P54652 [303-314]; P11142-1 [300-311]			Heat shock-related 70 kDa protein 2 [OS=Homo sapiens] Heat shock cognate 71 kDa protein [OS=Homo sapiens]	P54652; P11142-1; P11142-2	1	1480.75	12	FALSE	0.706	-0.5	0.0493832	0.185474	6.6321e+08	4.68183e+08	20.46	28.91	6	6	3.22946e+08	1.82254e+08	2.21419e+08	2.04054e+08	4.06653e+08	3.91273e+08	4.66727e+08	7.75879e+08	3.69718e+08	4.42742e+08	375779616	5.09324e+08	6.92802e+08	6.34882e+08	5.99238e+08	5.58074e+08
FALSE		High	Unambiguous	ARGPIQILNR	[R].ARGPIQILNR.[Q]			0.0594215	0.00272876	0.426	1	1	7	P30876	P30876 [1063-1072]			DNA-directed RNA polymerase II subunit RPB2 [OS=Homo sapiens]	P30876	1	1137.69	10	FALSE	100	6.64				315319		72.79		6							427685	476733	42390.7	28809.8	212001	324979
FALSE		High	Unambiguous	ASAGHVAVSSPTPETGPLQR	[R].ASAGHVAVSSPTPETGPLQR.[L]			0.00304958	0.0010893	0.953	1	1	6	P42695	P42695 [1320-1339]			condensin-2 complex subunit D3 [OS=Homo sapiens]	P42695	0	1962	20	FALSE	0.01	-6.64			150726		37.99		6		102010	66066	34221.8	33860.9	66394.5	71092.2							218838	230141	92616.5	92607.4
FALSE		High	Unambiguous	ASLLASQALHR	[R].ASLLASQALHR.[G]			0.0948604	0.0064943	0.34	1	3	6	Q9BWH6	Q9BWH6 [1068-1078]			RNA polymerase II-associated protein 1 [OS=Homo sapiens]	Q9BWH6; Q9BWH6-2; Q9BWH6-3	0	1166.66	11	FALSE	0.01	-6.64			390234		27.88		6		232697	143982	152798	134648	108609	132517							499193	501560	413526	368255
FALSE		High	Unambiguous	ASLLGDMHFR	[R].ASLLGDMHFR.[S]			0.133451	0.00860454	0.275	1	1	3	P51116	P51116 [191-200]			Fragile X mental retardation syndrome-related protein 2 [OS=Homo sapiens]	P51116	0	1146.57	10	FALSE	0.01	-6.64			114454		40.81		6		34222.4	11586.4	49374.5	51555.4	65130	46982							73415.6	40361.1	133625	141001
FALSE		High	Unambiguous	ASLPTLGFTHFQPAQLTTVGK	[R].ASLPTLGFTHFQPAQLTTVGK.[R]			0.089914	0.00584769	0.35	1	2	2	P30566	P30566 [150-170]			adenylosuccinate lyase [OS=Homo sapiens]	P30566-2; P30566	0	2214.19	21	FALSE	0.01	-6.64			60696		89.19		5		21754.6	17423.9	97034.6	73396.5		11429.5							46669.1	60696	262610	200735
FALSE		High	Unambiguous	ASNGDAWVEAHGK	[R].ASNGDAWVEAHGK.[L]			0.0314274	0.00194901	0.54	1	1	15	P38646	P38646 [147-159]			Stress-70 protein, mitochondrial [OS=Homo sapiens]	P38646	0	1341.62	13	FALSE	0.355	-1.5	0.0819158	0.240307	1.37154e+06	486369	40.12	97.02	6	5	573198	617160	590737	559350	286510	420100	695219	1.04429e+06	23787.4	36152.5		415738	1.22965e+06	2.14988e+06	1.59875e+06	1.52979e+06
FALSE		High	Unambiguous	ASNNDLNVATNFLLQH	[R].ASNNDLNVATNFLLQH.[-]			0.0663371	0.00359603	0.406	1	4	1	Q8NBM4-1	Q8NBM4-1 [329-344]			Ubiquitin-associated domain-containing protein 2 [OS=Homo sapiens]	Q8NBM4-1; Q8NBM4-4; Q8NBM4-2; Q8NBM4-3	0	1770.88	16	FALSE
FALSE		High	Unambiguous	ASQQEIQHIVNR	[R].ASQQEIQHIVNR.[H]			0.00145996	0.0010893	1.083	1	4	7	A5YKK6	A5YKK6 [27-38]			CCR4-NOT transcription complex subunit 1 [OS=Homo sapiens]	A5YKK6-2; A5YKK6; A5YKK6-4; A5YKK6-3	0	1422.74	12	FALSE	0.01	-6.64			185668		68.52		6		72536.7	63595.2	206762	204621	60153.1	74137.8							155609	221534	559573	559626
FALSE		High	Unambiguous	ASVLFDTMQHHLALNR	[R].ASVLFDTMQHHLALNR.[D]			0.0413853	0.00272876	0.491	1	1	2	P46821	P46821 [1834-1849]			microtubule-associated protein 1B [OS=Homo sapiens]	P46821	0	1852.95	16	FALSE
FALSE		High	Unambiguous	ASWESLDEEWRAPQAGSR	[R].ASWESLDEEWRAPQAGSR.[T]			0.0393496	0.00194901	0.5	1	2	1	Q00587-1	Q00587-1 [349-366]			Cdc42 effector protein 1 [OS=Homo sapiens]	Q00587-1; Q00587-2	1	2074.96	18	FALSE
FALSE		High	Unambiguous	ATAGDTHLGGEDFDNR	[K].ATAGDTHLGGEDFDNR.[L]			9.15657e-08	0.0010893	2.787	3	5	330	P17066; P0DMV8; P34931	P17066 [223-238]; P0DMV8 [221-236]; P34931 [223-238]			Heat shock 70 kDa protein 6 [OS=Homo sapiens] heat shock 70 kDa protein 1A [OS=Homo sapiens] Heat shock 70 kDa protein 1-like [OS=Homo sapiens]	P48741; P17066; P0DMV8-2; P0DMV8; P34931	0	1675.73	16	FALSE	0.569	-0.81	0.0584217	0.19844	5.4083e+08	3.07902e+08	34.22	43.46	6	6	2.16911e+08	1.80445e+08	2.92064e+08	2.95245e+08	1.53321e+08	1.93742e+08	2.63568e+08	3.36268e+08	5.30067e+08	5.32224e+08	1.41329e+08	2.30649e+08	4.65329e+08	6.28581e+08	7.90429e+08	8.07477e+08
FALSE		High	Unambiguous	ATAGDTHLGGEDFDNRLVNHFVEEFKR	[K].ATAGDTHLGGEDFDNRLVNHFVEEFKR.[K]			0.0995225	0.0064943	0.331	1	2	9	P0DMV8	P0DMV8 [221-247]			heat shock 70 kDa protein 1A [OS=Homo sapiens]	P0DMV8-2; P0DMV8	2	3074.47	27	FALSE
FALSE		High	Unambiguous	ATENDIYNFFSPLNPMR	[R].ATENDIYNFFSPLNPMR.[V]			0.0012386	0.0010893	1.112	1	1	9	P55795	P55795 [300-316]			heterogeneous nuclear ribonucleoprotein H2 [OS=Homo sapiens]	P55795	0	2028.95	17	FALSE	0.01	-6.64			518512		45.2		6		304935	192860	82572	70023.7	237648	235050							654163	671827	223469	191510
FALSE		High	Unambiguous	ATENDIYNFFSPLNPVR	[RK].ATENDIYNFFSPLNPVR.[V]			8.18324e-06	0.0010893	1.996	2	2	8	P31943; P52597	P31943 [300-316]; P52597 [300-316]			Heterogeneous nuclear ribonucleoprotein H [OS=Homo sapiens] Heterogeneous nuclear ribonucleoprotein F [OS=Homo sapiens]	P31943; P52597	0	1996.98	17	FALSE	0.592	-0.76	0.00229928	0.0221082	5.77805e+06	3.42297e+06	20.77	13.26	5	6	3.41157e+06	2.11145e+06		1.65559e+06	2.50494e+06	2.52461e+06	4.1397e+06	3785989	3.13255e+06	3.38189e+06	2.34332e+06	2.96143e+06	7.31869e+06	7.35522e+06		4.52794e+06
FALSE		High	Unambiguous	ATQQQHDFTLTQTADGR	[R].ATQQQHDFTLTQTADGR.[S]			0.000299772	0.0010893	1.362	1	2	22	P78527	P78527 [2637-2653]			DNA-dependent protein kinase catalytic subunit [OS=Homo sapiens]	P78527-2; P78527	0	1917.9	17	FALSE	0.01	-6.64			650389		33.65		6		490524	351180	235920	226320	259342	317509							1.0523e+06	1.22334e+06	638484	618972
FALSE		High	Unambiguous	ATVVVGDLHPLR	[R].ATVVVGDLHPLR.[D]			0.00311944	0.0010893	0.949	1	2	2	Q9NSI2-1	Q9NSI2-1 [137-148]			protein FAM207A [OS=Homo sapiens]	Q9NSI2-2; Q9NSI2-1	0	1276.74	12	FALSE
FALSE		High	Unambiguous	AVFPSIVGRPR	[R].AVFPSIVGRPR.[QH]			0.0229246	0.00194901	0.596	2	10	18	ACTB; P68032	ACTB [29-39]; P68032 [31-41]			Actin, cytoplasmic 1 OS=Bos taurus GN=ACTB PE=1 SV=1 Actin, alpha cardiac muscle 1 [OS=Homo sapiens]	A5A3E0; P63267-1; ACTB; P63267-2; Q6S8J3; P62736; P68133; P0CG38; P68032; P63261	0	1198.71	11	TRUE	100	6.64				9.35178e+07		11.54		6							102708744	9.55994e+07	88011104	9.35693e+07	5.99698e+07	74281037
FALSE		High	Unambiguous	AVFVDLEPTVIDEVR	[R].AVFVDLEPTVIDEVR.[T]			7.13175e-08	0.0010893	2.831	2	5	154	P68363; Q9BQE3	P68363 [65-79]; Q9BQE3 [65-79]			Tubulin alpha-1B chain [OS=Homo sapiens] Tubulin alpha-1C chain [OS=Homo sapiens]	Q71U36; P68363; Q71U36-2; Q9BQE3; P68363-2	0	1701.91	15	FALSE	0.633	-0.66	0.238105	0.448241	6.64068e+07	4.20606e+07	31.27	39.09	6	6	34051168	26706677	11342926	21979206	29656798	30894228	82970604	42050332	32445480	35162696	50994160	34418512	7.30483e+07	9.30327e+07	3.0698e+07	6.01118e+07
FALSE		High	Unambiguous	AVFVDLEPTVIDEVRTGTYR	[R].AVFVDLEPTVIDEVRTGTYR.[Q]			0.0357678	0.00194901	0.517	2	5	16	P68363; Q9BQE3	P68363 [65-84]; Q9BQE3 [65-84]			Tubulin alpha-1B chain [OS=Homo sapiens] Tubulin alpha-1C chain [OS=Homo sapiens]	Q71U36; P68363; Q71U36-2; Q9BQE3; P68363-2	1	2280.19	20	FALSE	0.887	-0.17	0.285471	0.502791	1.5325e+06	1.35861e+06	63.18	13.09	6	4	767633	503157	102484	59058.4	673049	724987	1433743	1.55053e+06			989983	1.08617e+06	1.64677e+06	1.75275e+06	277358	161521
FALSE		High	Unambiguous	AVLVDLEPGTMDSVR	[R].AVLVDLEPGTMDSVR.[S]			0.015018	0.0010893	0.671	2	3	7	P04350; Q3ZCM7	P04350 [63-77]; Q3ZCM7 [63-77]			Tubulin beta-4A chain [OS=Homo sapiens] tubulin beta-8 chain [OS=Homo sapiens]	P04350; Q3ZCM7; P68371	0	1601.82	15	FALSE
FALSE		High	Unambiguous	AVQELVHPVVDR	[R].AVQELVHPVVDR.[S]			0.00228447	0.0010893	1.004	1	4	11	A5YKK6	A5YKK6 [1400-1411]			CCR4-NOT transcription complex subunit 1 [OS=Homo sapiens]	A5YKK6-2; A5YKK6; A5YKK6-4; A5YKK6-3	0	1361.75	12	FALSE	0.814	-0.3	0.574565	0.730647	600318	488612	61.15	70.44	6	6	268053	179907	493441	484253	145393	159034	443849	508132	1.15659e+06	1.17089e+06	157361	226476	575042	626705	1.33543e+06	1.3244e+06
FALSE		High	Unambiguous	AVQIVSHPFFGR	[R].AVQIVSHPFFGR.[V]			0.00516226	0.0010893	0.86	1	2	19	Q9BZQ6	Q9BZQ6 [649-660]			ER degradation-enhancing alpha-mannosidase-like protein 3 [OS=Homo sapiens]	Q9BZQ6; Q9BZQ6-2	0	1357.74	12	FALSE
FALSE		High	Unambiguous	AVTEQGHELSNEER	[K].AVTEQGHELSNEER.[N]			0.0094524	0.0010893	0.753	1	2	8	P31946	P31946 [30-43]			14-3-3 protein beta/alpha [OS=Homo sapiens]	P31946-2; P31946	0	1598.74	14	FALSE	0.01	-6.64			128838		101.86		6		36954.6	60107.3	222087	216590	16137.2	24427.5							79276.9	209384	601046	592361
FALSE		High	Unambiguous	AVTHTSPEDVSFAESR	[R].AVTHTSPEDVSFAESR.[R]			0.000612953	0.0010893	1.236	1	2	11	Q9BTW9	Q9BTW9 [800-815]			Tubulin-specific chaperone D [OS=Homo sapiens]	Q9BTW9; Q9BTW9-4	0	1732.81	16	FALSE	0.01	-6.64			192084		24.91		6		86102.6	57341.7	103077	99695.9	68165	81721.3							184712	199750	278964	272662
FALSE		High	Unambiguous	AYHLQDDGTQTVR	[R].AYHLQDDGTQTVR.[MC]			0.0239819	0.00194901	0.588	1	3	2	Q96DZ1	Q96DZ1 [397-409]			Endoplasmic reticulum lectin 1 [OS=Homo sapiens]	Q96DZ1; Q96DZ1-2; Q96DZ1-3	0	1503.72	13	FALSE	100	6.64				27031		99.71		5							128036	184156	21072.7		17683.8	23105.6
FALSE		High	Unambiguous	DAAASASTPAQAPTSDSPVAEDASR	[R].DAAASASTPAQAPTSDSPVAEDASR.[R]			0.00793358	0.0010893	0.784	1	1	4	P55789	P55789 [43-67]			FAD-linked sulfhydryl oxidase ALR [OS=Homo sapiens]	P55789	0	2373.08	25	FALSE	0.01	-6.64			91420.2		31.79		3			14966.7	33779.8	36960.5										52136.5	91420.2	101085
FALSE		High	Unambiguous	DGQVINETSQHHDDLE	[R].DGQVINETSQHHDDLE.[-]			0.0235798	0.00194901	0.591	1	1	6	P08670	P08670 [451-466]			Vimentin [OS=Homo sapiens]	P08670	0	1836.8	16	FALSE	0.01	-6.64			342002		62.47		5		108277	98177.6	180802	177384		9745.19							232281	342002	489315	485134
FALSE		High	Unambiguous	DHYEATAMHR	[K].DHYEATAMHR.[A]			0.0020747	0.0010893	1.021	1	2	6	O75832	O75832 [136-145]			26S proteasome non-ATPase regulatory subunit 10 [OS=Homo sapiens]	O75832-2; O75832	0	1230.53	10	FALSE	0.01	-6.64			60237.5		127.54		6		3872.49	7991.04	169811	221845	24060.4	31333.4							8307.46	27836.8	459568	606733
FALSE		High	Unambiguous	DKSDSPAIQLR	[R].DKSDSPAIQLR.[L]			0.000289731	0.0010893	1.368	1	1	6	Q96ST3	Q96ST3 [936-946]			Paired amphipathic helix protein Sin3a [OS=Homo sapiens]	Q96ST3	1	1229.65	11	FALSE	100	6.64				2.81484e+06		43.9		6							2.43333e+06	3.25862e+06	3139936	3.21389e+06	654218	1.30602e+06
FALSE		High	Unambiguous	DLDFSEFVIQPQNESNPELYK	[R].DLDFSEFVIQPQNESNPELYK.[Y]			0.000225675	0.0010893	1.412	1	1	6	P51784	P51784 [851-871]			Ubiquitin carboxyl-terminal hydrolase 11 [OS=Homo sapiens]	P51784	0	2512.19	21	FALSE
FALSE		High	Unambiguous	DLEAEHVEVEDTTLNR	[R].DLEAEHVEVEDTTLNR.[C]			2.1009e-05	0.0010893	1.83	1	2	7	Q9H3K6-1	Q9H3K6-1 [15-30]			bola-like protein 2 [OS=Homo sapiens]	Q9H3K6-1; Q9H3K6-2	0	1869.88	16	FALSE
FALSE		High	Unambiguous	DIENQYETQITQIEHEVSSSGQEVQSSAK	[K].DIENQYETQITQIEHEVSSSGQEVQSSAK.[E]			7.01978e-06	0.0010893	2.023	1	1	4	KRT9	KRT9 [340-368]			Keratin, type I cytoskeletal 9 OS=Homo sapiens GN=KRT9 PE=1 SV=3	KRT9	0	3264.51	29	TRUE	100	6.64				4.172e+06		56.2		6							822162	957091	3968305	4.13015e+06	3.86046e+06	3.9589e+06
FALSE		High	Unambiguous	DIPIWGTLIQYIRPVFVSR	[R].DIPIWGTLIQYIRPVFVSR.[S]			0.000339657	0.0010893	1.34	1	1	6	Q8NF37	Q8NF37 [159-177]			Lysophosphatidylcholine acyltransferase 1 [OS=Homo sapiens]	Q8NF37	0	2273.28	19	FALSE	0.01	-6.64			1.01654e+06		31.53		5		606743	485276	364757	371686		356683							1.30162e+06	1.69046e+06	987163	1.01654e+06
FALSE		High	Unambiguous	DMLGGNGISDEYHVIR	[R].DMLGGNGISDEYHVIR.[H]			0.0243908	0.00194901	0.585	1	2	14	Q92947-1	Q92947-1 [387-402]			Glutaryl-CoA dehydrogenase, mitochondrial [OS=Homo sapiens]	Q92947-1; Q92947-2	0	1775.84	16	FALSE	0.01	-6.64			750188		51.22		6		378199	199125	244247	230763	772193	796191							811332	693651	661021	631123
FALSE		High	Unambiguous	DNHLLGTFDLTGIPPAPR	[K].DNHLLGTFDLTGIPPAPR.[G]			0.000374074	0.0010893	1.323	1	1	36	P11021	P11021 [475-492]			78 kDa glucose-regulated protein [OS=Homo sapiens]	P11021	0	1934.01	18	FALSE
FALSE		High	Unambiguous	DQEGQDVLLFIDNIFR	[R].DQEGQDVLLFIDNIFR.[F]			0.000722598	0.0010893	1.207	1	1	1	P06576	P06576 [295-310]			ATP synthase subunit beta, mitochondrial [OS=Homo sapiens]	P06576	0	1921.97	16	FALSE
FALSE		High	Unambiguous	DQGGFGDRNEYGSR	[R].DQGGFGDRNEYGSR.[I]			0.0290451	0.00194901	0.554	1	1	9	Q92945	Q92945 [307-320]			Far upstream element-binding protein 2 [OS=Homo sapiens]	Q92945	1	1557.67	14	FALSE	0.01	-6.64			207274		80.74		4				172187	165509	29648.9	45486.5									465998	452656
FALSE		High	Unambiguous	DQHDTFFLR	[R].DQHDTFFLR.[D]			0.0093462	0.0010893	0.755	1	2	1	Q9Y285	Q9Y285 [272-280]			Phenylalanine--tRNA ligase alpha subunit [OS=Homo sapiens]	Q9Y285-2; Q9Y285	0	1178.56	9	FALSE
FALSE		High	Unambiguous	DRFTWEGLYNVLMYR	[R].DRFTWEGLYNVLMYR.[L]			3.91939e-07	0.0010893	2.531	1	1	47	P51784	P51784 [624-638]			Ubiquitin carboxyl-terminal hydrolase 11 [OS=Homo sapiens]	P51784	1	1962.95	15	FALSE	0.463	-1.11	0.0381436	0.157954	7.39078e+06	3420147	38.39	44.77	6	5	2.48035e+06	1.62871e+06	2.60756e+06	2.83018e+06	5.56956e+06	5.80859e+06	3.0384e+06		3.01197e+06	3420147	4.94001e+06	6625779	5.32097e+06	5.6736e+06	7.05698e+06	7.74037e+06
FALSE		High	Unambiguous	DRPLSAENPGGEPEAPGEGGPAPEPR	[R].DRPLSAENPGGEPEAPGEGGPAPEPR.[A]			0.0700725	0.00434873	0.396	1	1	4	Q1L5Z9	Q1L5Z9 [110-135]			LON peptidase N-terminal domain and RING finger protein 2 [OS=Homo sapiens]	Q1L5Z9	0	2583.21	26	FALSE	0.01	-6.64			139569		49.85		6		70570.9	16621	71944.7	13832.9	60560.4	66828.9							151392	57899.2	194708	37832.1
FALSE		High	Unambiguous	DSAWGTSDHSVSQPIMVQR	[R].DSAWGTSDHSVSQPIMVQR.[R]			0.0176874	0.0010893	0.642	1	3	2	Q14671-1	Q14671-1 [174-192]			Pumilio homolog 1 [OS=Homo sapiens]	Q14671-2; Q14671-1; Q14671-3	0	2100.98	19	FALSE
FALSE		High	Unambiguous	DSAYQSITHYRPVSASR	[R].DSAYQSITHYRPVSASR.[S]			0.000281621	0.0010893	1.373	1	1	58	P50402	P50402 [158-174]			Emerin [OS=Homo sapiens]	P50402	0	1937.95	17	FALSE	1.024	0.03	0.44539	0.667932	1.43879e+06	1.47292e+06	26.47	17.63	6	6	986547	604356	467064	426804	659207	652451	1.42903e+06	1.5492e+06	1.41099e+06	1.64514e+06	793340	1.09764e+06	2.11639e+06	2.10527e+06	1.26404e+06	1.16728e+06
FALSE		High	Unambiguous	DSDSGLEQMSIGHHIR	[R].DSDSGLEQMSIGHHIR.[D]			0.000414321	0.0010893	1.305	1	1	7	Q15773	Q15773 [143-158]			Myeloid leukemia factor 2 [OS=Homo sapiens]	Q15773	0	1781.82	16	FALSE	0.912	-0.13	0.194877	0.408735	327047	298330	18.86	64.69	6	6	156235	91611.1	100143	94476.5	169648	198349	341541	354044	41053.2	51831	208504	324772	335164	319127	271023	258387
FALSE		High	Unambiguous	DSFDDRGPSLNPVLDYDHGSR	[R].DSFDDRGPSLNPVLDYDHGSR.[S]			7.45569e-05	0.0010893	1.607	1	1	30	P43243	P43243 [187-207]			Matrin-3 [OS=Homo sapiens]	P43243	1	2362.07	21	FALSE	0.01	-6.64			1.06931e+06		40.03		6		803683	462225	245437	245611	506404	469120							1.7241e+06	1.61016e+06	664239	671732
FALSE		High	Unambiguous	DSGQWHYFDDNSVSPVNENQIESK	[K].DSGQWHYFDDNSVSPVNENQIESK.[A]			9.05314e-08	0.0010893	2.789	1	1	51	P51784	P51784 [897-920]			Ubiquitin carboxyl-terminal hydrolase 11 [OS=Homo sapiens]	P51784	0	2795.22	24	FALSE	0.817	-0.29	0.183067	0.389018	4.00623e+06	3.27366e+06	28.11	27.18	6	6	1101460	1.00931e+06	1.8831e+06	1.84265e+06	1.97901e+06	1.52045e+06	2502261	1.60252e+06	3.11868e+06	3937664	2.62311e+06	3164366	2.36291e+06	3.51593e+06	5.09633e+06	5.03955e+06
FALSE		High	Unambiguous	DVTEAEQAEEQARQEEQVVR	[K].DVTEAEQAEEQARQEEQVVR.[Q]			0.000284837	0.0010893	1.371	1	1	6	Q12788	Q12788 [634-653]			Transducin beta-like protein 3 [OS=Homo sapiens]	Q12788	1	2344.1	20	FALSE
FALSE		High	Unambiguous	DWEQFHQPR	[R].DWEQFHQPR.[N]			0.11538	0.00860454	0.303	1	1	4	Q9H773	Q9H773 [46-54]			dCTP pyrophosphatase 1 [OS=Homo sapiens]	Q9H773	0	1242.57	9	FALSE	0.01	-6.64			191858		55.69		6		79375	60775.9	173402	177318	69387.3	83324.1							170279	211713	469286	484955
FALSE		High	Unambiguous	DYGVYLEDSGHTLR	[K].DYGVYLEDSGHTLR.[G]			0.00121082	0.0010893	1.116	1	1	9	Q13162	Q13162 [187-200]			Peroxiredoxin-4 [OS=Homo sapiens]	Q13162	0	1624.76	14	FALSE	1.061	0.09	0.953653	0.972272	466186	494485	62.66	50.49	5	6	119128	88577.2	369868	393381		223418	320263	320434	777267	1.076e+06	383071	442302	255559	308559	1.001e+06	1.07587e+06
FALSE		High	Unambiguous	DYNNSYYGLMLFGHPLLVSVPR	[R].DYNNSYYGLMLFGHPLLVSVPR.[D]			2.7034e-06	0.0010893	2.191	1	1	11	P51784	P51784 [602-623]			Ubiquitin carboxyl-terminal hydrolase 11 [OS=Homo sapiens]	P51784	0	2555.28	22	FALSE	100	6.64				8.04851e+06		43.25		6							3489236	3408194	6.91272e+06	9280884	7.15323e+06	9587606
FALSE		High	Unambiguous	EAATAVEQEKEILLEMIHSIQNSQDMR	[R].EAATAVEQEKEILLEMIHSIQNSQDMR.[Q]			0.0290451	0.00194901	0.554	1	2	7	O95816	O95816 [44-70]			BAG family molecular chaperone regulator 2 [OS=Homo sapiens]	O95816-2; O95816	1	3113.52	27	FALSE	0.01	-6.64			1.34389e+06		29.49		4				421251	439167	909557	720625									1.14006e+06	1.2011e+06
FALSE		High	Unambiguous	EAEDNIREMLMAR	[K].EAEDNIREMLMAR.[R]			0.000582432	0.0010893	1.245	1	1	2	O60925	O60925 [107-119]			prefoldin subunit 1 [OS=Homo sapiens]	O60925	1	1577.74	13	FALSE	0.01	-6.64			151961		97.54		6		58644.8	27560.8	56159.6	55552.8	353582	373476							125808	96008.1	151988	151934
FALSE		High	Unambiguous	EAGFHQYEVSNFAR	[R].EAGFHQYEVSNFAR.[N]			0.0203653	0.0010893	0.617	1	2	8	Q9HA92	Q9HA92 [266-279]			Radical S-adenosyl methionine domain-containing protein 1, mitochondrial [OS=Homo sapiens]	Q9HA92-2; Q9HA92	0	1654.76	14	FALSE	0.01	-6.64			164562		12.99		6		60218	47846.5	71263.7	65465.6	69134.3	77866.7							129183	166673	192865	179044
FALSE		High	Unambiguous	EAGGNYTPALTEQEVYAQVAR	[K].EAGGNYTPALTEQEVYAQVAR.[L]			0.00428302	0.0010893	0.893	1	1	2	Q96ST3	Q96ST3 [344-364]			Paired amphipathic helix protein Sin3a [OS=Homo sapiens]	Q96ST3	0	2267.09	21	FALSE
FALSE		High	Unambiguous	EAIHSQLLEK	[K].EAIHSQLLEK.[Q]			0.0154477	0.0010893	0.666	1	1	7	O60925	O60925 [74-83]			prefoldin subunit 1 [OS=Homo sapiens]	O60925	0	1167.64	10	FALSE	100	6.64				2.67951e+06		60.17		6							2.3595e+06	2.87457e+06	3863206	4.04923e+06	453589	812816
FALSE		High	Unambiguous	EALLSSAVDHGSDEVK	[R].EALLSSAVDHGSDEVK.[F]			0.0865931	0.00584769	0.357	1	2	3	P78371-1	P78371-1 [139-154]			T-complex protein 1 subunit beta [OS=Homo sapiens]	P78371-2; P78371-1	0	1656.81	16	FALSE	0.01	-6.64			119896		56.97		5		55889		102819	107802	43279.7	43950.5							119896		278266	294831
FALSE		High	Unambiguous	EAQNSHVYWWR	[R].EAQNSHVYWWR.[Y]			0.00187351	0.0010893	1.039	1	1	69	Q9Y2S7	Q9Y2S7 [254-264]			Polymerase delta-interacting protein 2 [OS=Homo sapiens]	Q9Y2S7	0	1475.68	11	FALSE	1.908	0.93	0.0257629	0.121071	7.28029e+06	1.3888e+07	47.76	46.76	6	6	2.63109e+06	1.76071e+06	5.76234e+06	5443455	3.26236e+06	3375524	1.19752e+07	12500444	25799752	31034775	9422222	1.26231e+07	5.64434e+06	6.13343e+06	1.55949e+07	1.48875e+07
FALSE		High	Unambiguous	EAYPGDVFYLHSR	[R].EAYPGDVFYLHSR.[L]			0.000756154	0.0010893	1.199	1	3	43	P25705-1	P25705-1 [335-347]			ATP synthase subunit alpha, mitochondrial [OS=Homo sapiens]	P25705-2; P25705-1; P25705-3	0	1553.74	13	FALSE	7.467	2.9	2.69684e-06	0.000235674	2.28925e+06	1.70933e+07	39.89	23.65	6	6	1.95888e+06	684857	701142	497460	1.04979e+06	1.05276e+06	18621732	17849966	14752108	18733422	8.16231e+06	10741492	4.20229e+06	2.3857e+06	1.89754e+06	1.36052e+06
FALSE		High	Unambiguous	EDLMGLAIGTHGSNIQQAR	[R].EDLMGLAIGTHGSNIQQAR.[K]			0.0475913	0.00272876	0.466	1	3	3	P51114-1	P51114-1 [227-245]			Fragile X mental retardation syndrome-related protein 1 [OS=Homo sapiens]	P51114-1; P51114-2; P51114-3	0	2011	19	FALSE
FALSE		High	Unambiguous	EDQTEYLEERR	[K].EDQTEYLEERR.[IV]			0.0282385	0.00194901	0.559	2	4	5	P07900; P08238	P07900 [192-202]; P08238 [187-197]			Heat shock protein HSP 90-alpha [OS=Homo sapiens] Heat shock protein HSP 90-beta [OS=Homo sapiens]	P07900-2; P07900; P08238; Q58FF7	1	1467.67	11	FALSE	0.01	-6.64			121347		26.53		4				38820.4	40860.5	57124.8	87672									105062	111751
FALSE		High	Unambiguous	EEKPIEDEIER	[R].EEKPIEDEIER.[K]			0.0170988	0.0010893	0.648	1	4	3	Q4LE39-1	Q4LE39-1 [451-461]			AT-rich interactive domain-containing protein 4B [OS=Homo sapiens]	Q4LE39-3; Q4LE39-2; Q4LE39-1; Q4LE39-4	0	1386.67	11	FALSE	100	6.64				93459.3		90.96		4							206152	224339			10492.8	35746.9
FALSE		High	Unambiguous	EFLDFFWDIAKPEQETR	[R].EFLDFFWDIAKPEQETR.[L]			0.0384765	0.00194901	0.504	1	2	3	Q9BQG0	Q9BQG0 [34-50]			Myb-binding protein 1A [OS=Homo sapiens]	Q9BQG0; Q9BQG0-2	0	2171.04	17	FALSE
FALSE		High	Unambiguous	EFSITDVVPYPISLR	[R].EFSITDVVPYPISLR.[W]			0.000405019	0.0010893	1.309	1	1	7	P34932	P34932 [391-405]			Heat shock 70 kDa protein 4 [OS=Homo sapiens]	P34932	0	1735.93	15	FALSE	0.01	-6.64			449032		45.64		6		226711	63583.1	140053	151585	380227	315920							486352	221492	379034	414576
FALSE		High	Unambiguous	EFTQGVKPDWTIAR	[R].EFTQGVKPDWTIAR.[I]			0.117206	0.00860454	0.3	1	1	4	Q8WWC4	Q8WWC4 [270-283]			m-AAA protease-interacting protein 1, mitochondrial [OS=Homo sapiens]	Q8WWC4	0	1647.85	14	FALSE
FALSE		High	Unambiguous	EHAAPFSAFLTDSFGR	[R].EHAAPFSAFLTDSFGR.[Q]			0.0282385	0.00194901	0.559	1	6	1	Q9NZB8	Q9NZB8 [52-67]			Molybdenum cofactor biosynthesis protein 1 [OS=Homo sapiens]	Q9NZB8-2; Q9NZB8-3; Q9NZB8-8; Q9NZB8-6; Q9NZB8-5; Q9NZB8	0	1752.83	16	FALSE
FALSE		High	Unambiguous	EHALLAYTLGVK	[R].EHALLAYTLGVK.[Q]			0.00133335	0.0010893	1.099	1	3	23	P68104	P68104 [135-146]			Elongation factor 1-alpha 1 [OS=Homo sapiens]	Q05639; P68104; Q5VTE0	0	1314.74	12	FALSE
FALSE		High	Unambiguous	EHAPSIIFMDEIDSIGSSR	[R].EHAPSIIFMDEIDSIGSSR.[L]			0.00893318	0.0010893	0.763	1	2	5	P62195-1	P62195-1 [240-258]			26S proteasome regulatory subunit 8 [OS=Homo sapiens]	P62195-2; P62195-1	0	2104	19	FALSE
FALSE		High	Unambiguous	EHLAQKPVFLPR	[R].EHLAQKPVFLPR.[N]			0.00115711	0.0010893	1.124	1	1	75	Q96ST3	Q96ST3 [1117-1128]			Paired amphipathic helix protein Sin3a [OS=Homo sapiens]	Q96ST3	0	1434.82	12	FALSE	1.304	0.38	0.00838376	0.057616	1.17812e+07	1.5359e+07	11.08	14.62	6	6	5.71069e+06	3.18688e+06	4.57067e+06	4.12179e+06	6.37199e+06	5.42962e+06	1.20525e+07	1.42712e+07	1.68658e+07	1.86191e+07	1.2391e+07	13192093	1.22509e+07	1.11015e+07	1.23699e+07	1.12728e+07
FALSE		High	Unambiguous	EHLELFWSR	[R].EHLELFWSR.[V]			0.013799	0.0010893	0.686	1	2	4	Q00610-1	Q00610-1 [1334-1342]			Clathrin heavy chain 1 [OS=Homo sapiens]	Q00610-1; Q00610-2	0	1216.61	9	FALSE
FALSE		High	Unambiguous	EHMSSSSSLQSR	[R].EHMSSSSSLQSR.[E]			0.000136908	0.0010893	1.5	1	2	22	Q9H0E3	Q9H0E3 [78-89]			Histone deacetylase complex subunit SAP130 [OS=Homo sapiens]	Q9H0E3; Q9H0E3-3	0	1335.6	12	FALSE	0.341	-1.55	0.264191	0.487621	839294	285901	77.59	100.15	6	6	189973	496185	790761	786600	129611	174718	254331	303610	1.51911e+06	1.41866e+06	113675	203314	407539	1.72846e+06	2.14008e+06	2.1513e+06
FALSE		High	Unambiguous	EKLDTLVEFPIR	[R].EKLDTLVEFPIR.[D]			0.000320909	0.0010893	1.35	1	1	66	P51784	P51784 [839-850]			Ubiquitin carboxyl-terminal hydrolase 11 [OS=Homo sapiens]	P51784	1	1459.82	12	FALSE
FALSE		High	Unambiguous	EKLDTLVEFPIRDLDFSEFVIQPQNESNPELYK	[R].EKLDTLVEFPIRDLDFSEFVIQPQNESNPELYK.[Y]			0.00353324	0.0010893	0.927	1	1	21	P51784	P51784 [839-871]			Ubiquitin carboxyl-terminal hydrolase 11 [OS=Homo sapiens]	P51784	2	3952.99	33	FALSE	0.01	-6.64			3.89485e+06		29.3		6		1.07546e+06	798972	1.94667e+06	1.39436e+06	2.02595e+06	1.90643e+06							2.30713e+06	2.78322e+06	5.26838e+06	3.81348e+06
FALSE		High	Unambiguous	EIAEAYLGYPVTNAVITVPAYFNDSQR	[K].EIAEAYLGYPVTNAVITVPAYFNDSQR.[Q]			5.52323e-08	0.0010893	2.876	1	1	23	P0DMV8	P0DMV8 [129-155]			heat shock 70 kDa protein 1A [OS=Homo sapiens]	P0DMV8	0	3001.49	27	FALSE	100	6.64				7.86863e+07		30.32		6							43423528	40072752	81379760	84759432	59217232	73221832
FALSE		High	Unambiguous	EIETYHNLLEGGQEDFESSGAGK	[K].EIETYHNLLEGGQEDFESSGAGK.[I]			1.17969e-06	0.0010893	2.337	1	1	44	KRT9	KRT9 [450-472]			Keratin, type I cytoskeletal 9 OS=Homo sapiens GN=KRT9 PE=1 SV=3	KRT9	0	2510.13	23	TRUE
FALSE		High	Unambiguous	ELFEELDRPAASDEELTR	[R].ELFEELDRPAASDEELTR.[L]			0.000881325	0.0010893	1.172	1	1	6	Q8IY37	Q8IY37 [811-828]			Probable ATP-dependent RNA helicase DHX37 [OS=Homo sapiens]	Q8IY37	0	2120.01	18	FALSE	0.01	-6.64			76155.2		26.46		5		51454.8	22011.7	28139.4	19396.4		35092.4							110383	76677.7	76155.2	53047.9
FALSE		High	Unambiguous	ELGPQDLLWMLDHQEDGGEALR	[R].ELGPQDLLWMLDHQEDGGEALR.[A]			0.00802376	0.0010893	0.782	1	2	5	Q8N0W3-1	Q8N0W3-1 [499-520]			L-fucose kinase [OS=Homo sapiens]	Q8N0W3-1; Q8N0W3-2	0	2522.2	22	FALSE	0.01	-6.64			131040		19.01		6		48208.7	32692.1	56331.4	55180.7	65368.1	49795.2							103420	113883	152453	150916
FALSE		High	Unambiguous	ELHSWEPEPDVR	[R].ELHSWEPEPDVR.[T]			0.051164	0.00272876	0.453	1	1	2	Q9BTY7	Q9BTY7 [317-328]			Protein HGH1 homolog [OS=Homo sapiens]	Q9BTY7	0	1493.7	12	FALSE
FALSE		High	Unambiguous	EIIDLVLDRIR	[K].EIIDLVLDRIR.[K]			0.0201369	0.0010893	0.619	2	4	6	P68363; Q9BQE3	P68363 [113-123]; Q9BQE3 [113-123]			Tubulin alpha-1B chain [OS=Homo sapiens] Tubulin alpha-1C chain [OS=Homo sapiens]	Q71U36; P68363; Q71U36-2; Q9BQE3	1	1354.81	11	FALSE	100	6.64				585776		24.77		4							655376	597296			289984	469985
FALSE		High	Unambiguous	EILLEMIHSIQNSQDMR	[K].EILLEMIHSIQNSQDMR.[Q]			0.00260238	0.0010893	0.981	1	2	2	O95816	O95816 [54-70]			BAG family molecular chaperone regulator 2 [OS=Homo sapiens]	O95816-2; O95816	0	2057.02	17	FALSE
FALSE		High	Unambiguous	ELQNTVANLHVR	[R].ELQNTVANLHVR.[Q]			0.028882	0.00194901	0.555	1	1	4	O15127	O15127 [105-116]			Secretory carrier-associated membrane protein 2 [OS=Homo sapiens]	O15127	0	1393.75	12	FALSE	0.01	-6.64			473427		8.04		6		215580	139124	204929	180828	196377	216601							462475	484639	554611	494552
FALSE		High	Unambiguous	ELYDRYGEQGLR	[R].ELYDRYGEQGLR.[E]			0.00219565	0.0010893	1.011	1	1	6	O60884	O60884 [64-75]			DnaJ homolog subfamily A member 2 [OS=Homo sapiens]	O60884	1	1498.73	12	FALSE	0.807	-0.31	0.469669	0.676497	240622	194254	56.88	76.97	6	5	194150	96750.5	29229.2	33300.8	98604.6	121997	298600	336318		37150.4	38249.9	166045	416502	337031	79104.7	91075.6
FALSE		High	Unambiguous	EMAGDNKLLGQFTLIGIPPAPR	[R].EMAGDNKLLGQFTLIGIPPAPR.[G]			0.0020747	0.0010893	1.021	1	1	10	P38646	P38646 [492-513]			Stress-70 protein, mitochondrial [OS=Homo sapiens]	P38646	1	2338.26	22	FALSE	100	6.64				3.40213e+06		78.2		4							1831326	859187			5057086	6341586
FALSE		High	Unambiguous	EMDRETLIDVAR	[R].EMDRETLIDVAR.[T]			0.0163443	0.0010893	0.656	1	2	5	P40227-1	P40227-1 [142-153]			T-complex protein 1 subunit zeta [OS=Homo sapiens]	P40227-1; P40227-2	1	1447.72	12	FALSE	100	6.64				902151		51.67		6							371889	346595	1.20147e+06	1.39407e+06	909295	620221
FALSE		High	Unambiguous	EMEENFAVEAANYQDTIGR	[R].EMEENFAVEAANYQDTIGR.[L]			1.2041e-05	0.0010893	1.928	1	1	1	P08670	P08670 [346-364]			Vimentin [OS=Homo sapiens]	P08670	0	2186.97	19	FALSE
FALSE		High	Unambiguous	EMFLEDILR	[K].EMFLEDILR.[T]			0.0195772	0.0010893	0.624	1	1	3	Q9H6S0	Q9H6S0 [377-385]			Probable ATP-dependent RNA helicase YTHDC2 [OS=Homo sapiens]	Q9H6S0	0	1165.59	9	FALSE	100	6.64				118205		59.39		5								65487.9	111306	63444.8	117473	216177
FALSE		High	Unambiguous	EMVHADVELMR	[R].EMVHADVELMR.[T]			0.0413853	0.00272876	0.491	1	2	1	O60547-1	O60547-1 [357-367]			GDP-mannose 4,6 dehydratase [OS=Homo sapiens]	O60547-2; O60547-1	0	1329.63	11	FALSE
FALSE		High	Unambiguous	EPPAASWAVQPHYQLPTAFR	[R].EPPAASWAVQPHYQLPTAFR.[A]			0.0102303	0.0010893	0.739	1	1	12	Q8IYS1	Q8IYS1 [69-88]			Peptidase M20 domain-containing protein 2 [OS=Homo sapiens]	Q8IYS1	0	2266.14	20	FALSE
FALSE		High	Unambiguous	EPQHEELPGLDSQWR	[R].EPQHEELPGLDSQWR.[Q]			0.00304958	0.0010893	0.953	1	1	8	P51784	P51784 [69-83]			Ubiquitin carboxyl-terminal hydrolase 11 [OS=Homo sapiens]	P51784	0	1820.86	15	FALSE	0.01	-6.64			567877		49.49		6		259993	26828.1	327918	329827	250661	266125							557750	93455.7	887462	902055
FALSE		High	Unambiguous	EPWLLPSQHNDIIR	[R].EPWLLPSQHNDIIR.[D]			0.092357	0.00584769	0.345	1	2	3	Q14697-1	Q14697-1 [685-698]			Neutral alpha-glucosidase AB [OS=Homo sapiens]	Q14697-1; Q14697-2	0	1717.9	14	FALSE
FALSE		High	Unambiguous	EQQIVIQSSGGLSKDDIENMVK	[R].EQQIVIQSSGGLSKDDIENMVK.[N]			0.00445609	0.0010893	0.886	1	1	4	P38646	P38646 [542-563]			Stress-70 protein, mitochondrial [OS=Homo sapiens]	P38646	1	2418.22	22	FALSE
FALSE		High	Unambiguous	EQTEGEYSSLEHESAR	[R].EQTEGEYSSLEHESAR.[G]			0.0293741	0.00194901	0.552	1	2	4	O43837-1	O43837-1 [165-180]			isocitrate dehydrogenase [NAD] subunit beta, mitochondrial [OS=Homo sapiens]	O43837-2; O43837-1	0	1851.8	16	FALSE	0.431	-1.22	0.0677047	0.214398	297938	128320	55.23	57.98	5	6		85528.4	171808	155093	51659.8	65218.5	112029	138849	178307	228762	30255.8	48419.8		297938	464973	424170
FALSE		High	Unambiguous	EQVEPTPEDEDDDIELR	[R].EQVEPTPEDEDDDIELR.[G]			5.7741e-05	0.0010893	1.652	1	2	3	Q86TG7-1	Q86TG7-1 [46-62]			Retrotransposon-derived protein PEG10 [OS=Homo sapiens]	Q86TG7-1; Q86TG7-2	0	2028.89	17	FALSE
FALSE		High	Unambiguous	ERFLVEPQEDTR	[R].ERFLVEPQEDTR.[L]			0.000190323	0.0010893	1.442	1	1	21	P51784	P51784 [230-241]			Ubiquitin carboxyl-terminal hydrolase 11 [OS=Homo sapiens]	P51784	1	1518.75	12	FALSE	0.01	-6.64			1.31008e+06		19.27		6		597136	384615	454685	431853	737718	885217							1.28101e+06	1.33981e+06	1.23054e+06	1.18109e+06
FALSE		High	Unambiguous	ERFSPLTTNLINLLAENGR	[K].ERFSPLTTNLINLLAENGR.[L]			0.0432806	0.00272876	0.483	1	1	4	P48047	P48047 [99-117]			ATP synthase subunit O, mitochondrial [OS=Homo sapiens]	P48047	1	2158.16	19	FALSE	0.01	-6.64			276281		56.67		6		191713	133648	41376.8	30946.2	126368	125500							411272	465563	111980	84635.8
FALSE		High	Unambiguous	ERVEAVNMAEGIIHDTETK	[K].ERVEAVNMAEGIIHDTETK.[M]			2.17373e-05	0.0010893	1.824	1	1	14	P38646	P38646 [577-595]			Stress-70 protein, mitochondrial [OS=Homo sapiens]	P38646	1	2142.05	19	FALSE	5.05	2.34	0.456796	0.671909	457105	2.30818e+06	62.56	76.07	4	3			360127	267342	110130	136955			2.17346e+06	2.38334e+06	161175				974633	731163
FALSE		High	Unambiguous	ESLREVQLEELEAAR	[K].ESLREVQLEELEAAR.[D]			0.000200304	0.0010893	1.433	1	2	9	P51570	P51570 [253-267]			galactokinase [OS=Homo sapiens]	P51570; P51570-2	1	1771.92	15	FALSE
FALSE		High	Unambiguous	ESVDHLTIPSR	[R].ESVDHLTIPSR.[C]			0.00519154	0.0010893	0.859	1	1	1	P41252	P41252 [501-511]			isoleucine--tRNA ligase, cytoplasmic [OS=Homo sapiens]	P41252	0	1253.65	11	FALSE
FALSE		High	Unambiguous	ETDAHLANPVLPDEVLQEAVPGSIR	[R].ETDAHLANPVLPDEVLQEAVPGSIR.[T]			0.00493383	0.0010893	0.868	1	2	12	P18074-1	P18074-1 [300-324]			Tfiih basal transcription factor complex helicase xpd subunit [OS=Homo sapiens]	P18074-2; P18074-1	0	2670.37	25	FALSE	0.01	-6.64			507248		40.33		6		369060	129231	116907	92118.6	247785	302363							791726	450176	316391	251939
FALSE		High	Unambiguous	ETDLQELFRPFGSISR	[R].ETDLQELFRPFGSISR.[I]			0.00418716	0.0010893	0.897	1	1	3	O75821	O75821 [252-267]			Eukaryotic translation initiation factor 3 subunit G [OS=Homo sapiens]	O75821	0	1894.97	16	FALSE
FALSE		High	Unambiguous	ETGVDLTKDNMALQR	[R].ETGVDLTKDNMALQR.[V]			1.56363e-05	0.0010893	1.882	1	1	34	P38646	P38646 [293-307]			Stress-70 protein, mitochondrial [OS=Homo sapiens]	P38646	1	1690.84	15	FALSE	0.813	-0.3	0.365794	0.593615	4.40634e+06	3.5822e+06	52.41	43.19	6	6	2.21516e+06	1.09342e+06	1.50969e+06	1.43561e+06	4.48082e+06	5.06157e+06	3409007	3.4787e+06	3.14617e+06	3.53052e+06	4964921	7.09263e+06	4.75208e+06	3.80893e+06	4.08576e+06	3.9263e+06
FALSE		High	Unambiguous	ETLAQLQQEFQR	[R].ETLAQLQQEFQR.[A]			6.42429e-07	0.0010893	2.444	1	1	101	O15212	O15212 [106-117]			Prefoldin subunit 6 [OS=Homo sapiens]	O15212	0	1490.76	12	FALSE	0.785	-0.35	0.456456	0.671909	8.08243e+06	6.34447e+06	43.17	20.35	6	6	1.67425e+06	3.15169e+06	3.8715e+06	3.83069e+06	1.953e+06	2988264	5991673	6.34637e+06	5.41194e+06	6864190	5.81716e+06	3.22204e+06	3.5917e+06	1.09789e+07	1.04777e+07	1.04767e+07
FALSE		High	Unambiguous	ETLVYLTHLDYVDTER	[R].ETLVYLTHLDYVDTER.[I]			0.00121082	0.0010893	1.116	1	1	23	O14980	O14980 [459-474]			Exportin-1 [OS=Homo sapiens]	O14980	0	1966.98	16	FALSE	0.01	-6.64			97345.1		37.63		5		45377	20855.6	63461.2	61499.2		46051.1							97345.1	72650.6	171749	168197
FALSE		High	Unambiguous	ETSMVHELNR	[R].ETSMVHELNR.[Y]			0.082936	0.00584769	0.365	1	2	4	P61619	P61619 [406-415]			Protein transport protein Sec61 subunit alpha isoform 1 [OS=Homo sapiens]	P61619; P61619-3	0	1215.58	10	FALSE	3.575	1.84	0.0425255	0.170886	265718	949840	66.11	1.17	4	2			179544	194264	57705.7	69637.6			901808	942041					485911	531299
FALSE		High	Unambiguous	EVAAFAQFGSDLDAATQQLLSR	[R].EVAAFAQFGSDLDAATQQLLSR.[G]			5.94649e-08	0.0010893	2.863	1	3	18	P25705-1	P25705-1 [442-463]			ATP synthase subunit alpha, mitochondrial [OS=Homo sapiens]	P25705-2; P25705-1; P25705-3	0	2338.17	22	FALSE	0.836	-0.26	0.513503	0.697777	3.2764e+06	2.73962e+06	20.09	19.08	4	4	1079869	855564	1.35512e+06	1.31698e+06			2286838	2.40773e+06	3.32637e+06	2.98353e+06			2.31659e+06	2.98036e+06	3.66743e+06	3.60185e+06
FALSE		High	Unambiguous	EVDPLVYNMSHEDPGNVSYSEIGGLSEQIR	[R].EVDPLVYNMSHEDPGNVSYSEIGGLSEQIR.[E]			0.00154511	0.0010893	1.073	1	1	5	P62333	P62333 [114-143]			26S proteasome regulatory subunit 10B [OS=Homo sapiens]	P62333	0	3334.55	30	FALSE
FALSE		High	Unambiguous	EVWTQHPGESTVVSGGSEQR	[R].EVWTQHPGESTVVSGGSEQR.[D]			0.00565125	0.0010893	0.844	1	1	6	Q8WVS4	Q8WVS4 [553-572]			WD repeat-containing protein 60 [OS=Homo sapiens]	Q8WVS4	0	2170.02	20	FALSE	0.01	-6.64			195283		9.33		6		89286.4	58658.7	71174.9	64654.8	85829	111349							191542	204338	192625	176827
FALSE		High	Unambiguous	FADLSEAANRNNDALR	[K].FADLSEAANRNNDALR.[Q]			2.75936e-05	0.0010893	1.782	1	1	13	P08670	P08670 [295-310]			Vimentin [OS=Homo sapiens]	P08670	1	1776.86	16	FALSE	2.719	1.44	0.498607	0.694181	84804.7	230561	128.44	83.77	6	4	396174	224240	32244.9	30133.3	9461.35	10971.5	510475	528474			55823.8	87857.1	849894	781138	87266.2	82412.6
FALSE		High	Unambiguous	FATHAAALSVR	[R].FATHAAALSVR.[N]			0.000823323	0.0010893	1.184	1	2	2	P23246-1	P23246-1 [366-376]			splicing factor, proline- and glutamine-rich [OS=Homo sapiens]	P23246-1; P23246-2	0	1143.63	11	FALSE
FALSE		High	Unambiguous	FDAQTGADREVQR	[R].FDAQTGADREVQR.[I]			0.0372022	0.00194901	0.51	1	2	11	P43686	P43686 [275-287]			26S proteasome regulatory subunit 6B [OS=Homo sapiens]	P43686-2; P43686	1	1492.71	13	FALSE
FALSE		High	Unambiguous	FDGALNVDLTEFQTNLVPYPR	[R].FDGALNVDLTEFQTNLVPYPR.[I]			1.11954e-08	0.0010893	3.157	3	12	109	Q13748-1; P68363; Q9BQE3	Q13748-1 [244-264]; P68363 [244-264]; Q9BQE3 [244-264]			tubulin alpha-3C/D chain [OS=Homo sapiens] Tubulin alpha-1B chain [OS=Homo sapiens] Tubulin alpha-1C chain [OS=Homo sapiens]	Q13748-1; Q6PEY2; Q13748-2; Q71U36; Q9NY65; P68366-2; P68363; Q71U36-2; Q9BQE3; P68363-2; Q9NY65-2; P68366	0	2409.21	21	FALSE	0.419	-1.25	0.000223509	0.00360968	5.52109e+07	2.31554e+07	20.93	27.97	6	6	3.09028e+07	1.87279e+07	1.48875e+07	1.50339e+07	2.34977e+07	2.69527e+07	27578932	29141932	16020786	14215374	17137696	21679218	6.62943e+07	6.52386e+07	4.02908e+07	4.11168e+07
FALSE		High	Unambiguous	FDLLWLIQDRPDR	[R].FDLLWLIQDRPDR.[D]			8.59323e-05	0.0010893	1.582	1	2	17	P33993-1	P33993-1 [515-527]			DNA replication licensing factor MCM7 [OS=Homo sapiens]	P33993-1; P33993-3	0	1686.9	13	FALSE	0.01	-6.64			2.27052e+06		34.55		6		884574	700241	1.39353e+06	1.48395e+06	899831	1.01285e+06							1.89763e+06	2.43929e+06	3.77139e+06	4.05851e+06
FALSE		High	Unambiguous	FDLLWLIQDRPDRDNDLR	[R].FDLLWLIQDRPDRDNDLR.[L]			0.00135622	0.0010893	1.096	1	2	79	P33993-1	P33993-1 [515-532]			DNA replication licensing factor MCM7 [OS=Homo sapiens]	P33993-1; P33993-3	1	2300.18	18	FALSE	0.01	-6.64			8.04129e+06		41.6		6		7191744	4.40297e+06	3.03743e+06	2876154	3.01878e+06	3.09988e+06							1.54281e+07	1.53378e+07	8.22037e+06	7.8661e+06
FALSE		High	Unambiguous	FERPDGSHFDVR	[R].FERPDGSHFDVR.[I]			3.7286e-05	0.0010893	1.729	1	1	65	Q9Y2S7	Q9Y2S7 [336-347]			Polymerase delta-interacting protein 2 [OS=Homo sapiens]	Q9Y2S7	0	1461.69	12	FALSE	1.042	0.06	0.765109	0.873252	9.96342e+06	1.03776e+07	25.43	75.25	6	6	4934542	2.49424e+06	5.74314e+06	4.86386e+06	4.06544e+06	4.17041e+06	9420732	10799305	29019242	28801370	3.55852e+06	5901727	1.05858e+07	8.68869e+06	1.5543e+07	1.33024e+07
FALSE		High	Unambiguous	FFHLAFEEEFGR	[R].FFHLAFEEEFGR.[V]			0.127388	0.00860454	0.284	1	1	3	Q13347	Q13347 [269-280]			Eukaryotic translation initiation factor 3 subunit I [OS=Homo sapiens]	Q13347	0	1528.72	12	FALSE
FALSE		High	Unambiguous	FFQGMPEKPTTTVR	[R].FFQGMPEKPTTTVR.[L]			0.00288168	0.0010893	0.963	1	1	11	P43246-1	P43246-1 [22-35]			DNA mismatch repair protein MSH2 [OS=Homo sapiens]	P43246-1	0	1638.83	14	FALSE	0.472	-1.08	0.0709861	0.220466	3.29125e+06	1.55493e+06	47.76	46.72	6	6	542553	311221	1.18092e+06	1.23928e+06	1.74756e+06	1.88998e+06	578149	600970	1.79752e+06	2.0607e+06	1.10161e+06	1.52084e+06	1.16391e+06	1.08414e+06	3.196e+06	3.38934e+06
FALSE		High	Unambiguous	FGAPPHAGGGIGLER	[R].FGAPPHAGGGIGLER.[V]			0.0148495	0.0010893	0.673	1	2	5	P14868	P14868 [461-475]			Aspartate--tRNA ligase, cytoplasmic [OS=Homo sapiens]	P14868; P14868-2	0	1435.74	15	FALSE	0.01	-6.64			107124		70.18		6		52696.8	29140.5	105350	105988	25239.9	31431.2							113048	101511	285116	289871
FALSE		High	Unambiguous	FGMFEFLSNHMR	[R].FGMFEFLSNHMR.[D]			0.00252971	0.0010893	0.986	1	1	10	P53007	P53007 [102-113]			Tricarboxylate transport protein, mitochondrial [OS=Homo sapiens]	P53007	0	1515.69	12	FALSE	100	6.64				435838		4.6		2									397265	450249
FALSE		High	Unambiguous	FHGGNLFFLPGGAR	[R].FHGGNLFFLPGGAR.[S]			0.00780019	0.0010893	0.787	1	1	6	P55789	P55789 [10-23]			FAD-linked sulfhydryl oxidase ALR [OS=Homo sapiens]	P55789	0	1489.77	14	FALSE	0.01	-6.64			524738		10.28		3				193891		248967	223859									524738
FALSE		High	Unambiguous	FLDHPEIYR	[R].FLDHPEIYR.[S]			0.000795768	0.0010893	1.19	1	3	11	O75182-1	O75182-1 [176-184]			paired amphipathic helix protein sin3b [OS=Homo sapiens]	O75182-2; O75182-3; O75182-1	0	1189.6	9	FALSE	100	6.64				9.84937e+06		24.32		6							1.26139e+07	1.25361e+07	9110592	10026570	5.09069e+06	8.22189e+06
FALSE		High	Unambiguous	FIDTSQFILNR	[R].FIDTSQFILNR.[L]			0.000184994	0.0010893	1.447	1	1	37	O60220	O60220 [70-80]			Mitochondrial import inner membrane translocase subunit Tim8 A [OS=Homo sapiens]	O60220	0	1353.72	11	FALSE	0.488	-1.03	0.0145122	0.0808182	3.54398e+06	1.73045e+06	38.24	35.8	6	6	2.43768e+06	828214	827871	734252	1.88729e+06	2.25034e+06	1.58039e+06	3.00963e+06	1.30756e+06	1871501	1.51606e+06	1.12776e+06	5.22945e+06	2.88508e+06	2.24052e+06	2.00813e+06
FALSE		High	Unambiguous	FLEQQNQVLQTK	[R].FLEQQNQVLQTK.[W]			5.61243e-05	0.0010893	1.657	2	7	3	KRT2; KRT1	KRT2 [198-209]; KRT1 [200-211]			Keratin, type II cytoskeletal 2 epidermal OS=Homo sapiens GN=KRT2 PE=1 SV=2 Keratin, type II cytoskeletal 1 OS=Homo sapiens GN=KRT1 PE=1 SV=6	KRT77; KRT2; Krt71; Krt73; KRT1; Krt77; KRT2	0	1475.79	12	TRUE	0.01	-6.64			68323.7		45.81		4		27177.6		8154.34		35285.4	38371.9							58302.9		22068.6
FALSE		High	Unambiguous	FLEQQNQVLQTKWELLQQVDTSTR	[R].FLEQQNQVLQTKWELLQQVDTSTR.[T]			5.20662e-07	0.0010893	2.481	1	1	19	KRT1	KRT1 [200-223]			Keratin, type II cytoskeletal 1 OS=Homo sapiens GN=KRT1 PE=1 SV=6	KRT1	1	2932.52	24	TRUE	5.93	2.57	0.000925322	0.0110696	359429	2.13147e+06	28.22	42.48	4	4	222752	87630.6			183472	122033	2.9543e+06	3.14963e+06			1.14137e+06	1.29743e+06	477860	305261
FALSE		High	Unambiguous	FLLYDQTKAPPFVAR	[R].FLLYDQTKAPPFVAR.[E]			0.0017306	0.0010893	1.053	1	1	8	Q9Y2S7	Q9Y2S7 [200-214]			Polymerase delta-interacting protein 2 [OS=Homo sapiens]	Q9Y2S7	1	1765.96	15	FALSE	0.01	-6.64			438844		23.73		4		243255	130660	105122			202777							521844	455156	284498
FALSE		High	Unambiguous	FLNSFASMHR	[R].FLNSFASMHR.[F]			0.0468016	0.00272876	0.469	1	1	6	Q16795	Q16795 [213-222]			NADH dehydrogenase [ubiquinone] 1 alpha subcomplex subunit 9, mitochondrial [OS=Homo sapiens]	Q16795	0	1209.58	10	FALSE	0.01	-6.64			387026		51.01		6		66657.7	21461.6	160782	144092	183801	182160							142998	74761.5	435133	394083
FALSE		High	Unambiguous	FLNSGGFIGFATTIHQIVR	[R].FLNSGGFIGFATTIHQIVR.[Q]			0.0811613	0.00514875	0.369	1	1	2	O60568	O60568 [163-181]			Procollagen-lysine,2-oxoglutarate 5-dioxygenase 3 [OS=Homo sapiens]	O60568	0	2078.12	19	FALSE
FALSE		High	Unambiguous	FLREPVVTPQDLEGPGR	[R].FLREPVVTPQDLEGPGR.[A]			0.0056833	0.0010893	0.843	1	2	3	Q66K74	Q66K74 [453-469]			Microtubule-associated protein 1S [OS=Homo sapiens]	Q66K74-2; Q66K74	1	1910.01	17	FALSE	0.01	-6.64			195123				1		90955.7												195123
FALSE		High	Unambiguous	FLVGPDGVPLRR	[K].FLVGPDGVPLRR.[Y]			0.0674377	0.00434873	0.403	1	1	26	P07203	P07203 [167-178]			Glutathione peroxidase 1 [OS=Homo sapiens]	P07203	1	1325.77	12	FALSE	1.175	0.23	0.103427	0.26941	3.04616e+06	3.57897e+06	19.03	22.2	6	6	1.15954e+06	828305	1.12986e+06	1109547	1.84036e+06	1.69945e+06	3.27507e+06	3.17352e+06	3.635e+06	4810647	2596643	4.51243e+06	2.48751e+06	2.8854e+06	3.05782e+06	3.03454e+06
FALSE		High	Unambiguous	FMSVQRPGPYDRPGTAR	[K].FMSVQRPGPYDRPGTAR.[R]			0.114777	0.00860454	0.304	1	1	1	P52597	P52597 [201-217]			Heterogeneous nuclear ribonucleoprotein F [OS=Homo sapiens]	P52597	0	1934.97	17	FALSE
FALSE		High	Unambiguous	FNFFALLPHQR	[R].FNFFALLPHQR.[L]			0.00281714	0.0010893	0.967	1	2	13	Q7L592	Q7L592 [402-412]			Protein arginine methyltransferase NDUFAF7, mitochondrial [OS=Homo sapiens]	Q7L592; Q7L592-2	0	1389.74	11	FALSE	0.01	-6.64			108381		4.91		6		50003.5	32018	40461.6	36241.4	48217.4	48606							107270	111535	109503	99118.1
FALSE		High	Unambiguous	FNSVAGHFFFPLLQR	[R].FNSVAGHFFFPLLQR.[F]			0.000764783	0.0010893	1.197	1	1	16	Q9Y4R8	Q9Y4R8 [692-706]			telomere length regulation protein TEL2 homolog [OS=Homo sapiens]	Q9Y4R8	0	1779.93	15	FALSE	0.01	-6.64			314565		19.16		6		168259	88495.3	125657	117365	110207	99662.7							360958	308273	340072	320986
FALSE		High	Unambiguous	FPAVGEPNIQQYAQNMGLPQNR	[R].FPAVGEPNIQQYAQNMGLPQNR.[I]			0.00126701	0.0010893	1.108	1	4	6	O15294	O15294 [878-899]			UDP-N-acetylglucosamine--peptide N-acetylglucosaminyltransferase 110 kDa subunit [OS=Homo sapiens]	O15294-4; O15294; O15294-2; O15294-3	0	2472.21	22	FALSE
FALSE		High	Unambiguous	FPEHELTFDPQR	[R].FPEHELTFDPQR.[Q]			0.0656129	0.00359603	0.408	1	2	1	Q9Y4L1	Q9Y4L1 [120-131]			Hypoxia up-regulated protein 1 [OS=Homo sapiens]	Q9Y4L1; Q9Y4L1-2	0	1515.72	12	FALSE
FALSE		High	Unambiguous	FPFLGVHFTPR	[R].FPFLGVHFTPR.[M]			0.00331991	0.0010893	0.938	1	2	12	Q9H9P8-1	Q9H9P8-1 [308-318]			L-2-hydroxyglutarate dehydrogenase, mitochondrial [OS=Homo sapiens]	Q9H9P8-2; Q9H9P8-1	0	1317.71	11	FALSE	3.571	1.84	0.743006	0.870585	344758	1.23101e+06	46.28	79.81	6	3	83581.6	71710.1	216118	227947	157718	156576	74908.8		1.15916e+06	1.39283e+06			179304	249802	584894	623421
FALSE		High	Unambiguous	FPGQLNADLRK	[R].FPGQLNADLRK.[L]			7.68761e-06	0.0010893	2.007	6	12	63	Q13509; P04350; Q9BUF5; Q3ZCM7; P07437; Q9BVA1	Q13509 [242-252]; P04350 [242-252]; Q9BUF5 [242-252]; Q3ZCM7 [242-252]; P07437 [242-252]; Q9BVA1 [242-252]			tubulin beta-3 chain [OS=Homo sapiens] Tubulin beta-4A chain [OS=Homo sapiens] Tubulin beta-6 chain [OS=Homo sapiens] tubulin beta-8 chain [OS=Homo sapiens] tubulin beta chain [OS=Homo sapiens] Tubulin beta-2B chain [OS=Homo sapiens]	Q13885; Q13509; Q9H4B7; P04350; A6NNZ2; Q9BUF5; Q13509-2; Q3ZCM7; TUBB1; P07437; P68371; Q9BVA1	1	1258.69	11	TRUE	0.796	-0.33	0.0662527	0.212605	1.12059e+07	8.91871e+06	28.56	26.31	6	6	7.3138e+06	4614103	3201313	2.98747e+06	4.88044e+06	5345756	8485709	8855204	5.68862e+06	5755290	7.66493e+06	9.92525e+06	1.56899e+07	1.60732e+07	8.66389e+06	8.17054e+06
FALSE		High	Unambiguous	FPLDYYSIPFPTPTTPLTGR	[R].FPLDYYSIPFPTPTTPLTGR.[D]			0.0736016	0.00434873	0.387	1	5	7	Q14157-1	Q14157-1 [830-849]			Isoform 2 of Ubiquitin-associated protein 2-like [OS=Homo sapiens]	Q14157-1; Q14157-5; Q14157-4; Q14157-2; Q14157-3	0	2283.17	20	FALSE	0.01	-6.64			111830		13.65		6		56244.7	27542.1	37031.5	37897.3	57897.5	60498.2							120659	95942.8	100221	103647
FALSE		High	Unambiguous	FQEAEERPK	[R].FQEAEERPK.[M]			0.000690529	0.0010893	1.215	1	4	23	Q92598	Q92598 [706-714]			Heat shock protein 105 kDa [OS=Homo sapiens]	Q92598-3; Q92598-2; Q92598-4; Q92598	0	1133.56	9	FALSE	0.161	-2.64	0.0607806	0.200328	4.97188e+06	798809	79.19	112.05	6	6	968163	3.31128e+06	4.6485e+06	4.81687e+06	804848	1.02705e+06	592589	843957	5.7093e+06	5.5267e+06	361156	618552	2.07695e+06	1.15348e+07	1.25805e+07	1.31738e+07
FALSE		High	Unambiguous	FQESEERPK	[R].FQESEERPK.[L]			0.00244518	0.0010893	0.992	1	1	20	P34932	P34932 [689-697]			Heat shock 70 kDa protein 4 [OS=Homo sapiens]	P34932	0	1149.55	9	FALSE	0.01	-6.64	0.0845634	0.240307	1.62134e+06	12102.4	94.96	135.81	6	5	299199	1.06196e+06	2.48116e+06	2.59203e+06	252217	340554	7263.9	11583.2	2.26862e+06	2.34311e+06		3796.88	641858	3.69932e+06	6.7149e+06	7.08903e+06
FALSE		High	Unambiguous	FQHVGTSVFLSVTGEQYGSPIR	[R].FQHVGTSVFLSVTGEQYGSPIR.[G]			0.000616442	0.0010893	1.235	1	1	12	Q9HCN8	Q9HCN8 [162-183]			Stromal cell-derived factor 2-like protein 1 [OS=Homo sapiens]	Q9HCN8	0	2409.22	22	FALSE	0.01	-6.64			200538		27.95		6		92326.7	51147.3	75024.7	69532.2	141965	147292							198064	178172	203044	190166
FALSE		High	Unambiguous	FRLDDSLGGTSEVIQR	[K].FRLDDSLGGTSEVIQR.[R]			0.00291451	0.0010893	0.961	1	2	6	O75182-1	O75182-1 [526-541]			paired amphipathic helix protein sin3b [OS=Homo sapiens]	O75182-2; O75182-1	1	1792.92	16	FALSE
FALSE		High	Unambiguous	FRIDELEPR	[R].FRIDELEPR.[R]			0.00110579	0.0010893	1.132	1	2	31	Q14697-1	Q14697-1 [101-109]			Neutral alpha-glucosidase AB [OS=Homo sapiens]	Q14697-1; Q14697-2	1	1174.62	9	FALSE	1.077	0.11	0.654945	0.798707	943180	1.01597e+06	48.97	55.93	6	6	422248	486695	198937	146170	473252	470656	1.42369e+06	999228	254044	275997	922986	845104	905829	1.6954e+06	538395	399766
FALSE		High	Unambiguous	FRLDNTLGGTSEVIHR	[K].FRLDNTLGGTSEVIHR.[K]			1.84361e-05	0.0010893	1.853	1	1	36	Q96ST3	Q96ST3 [651-666]			Paired amphipathic helix protein Sin3a [OS=Homo sapiens]	Q96ST3	1	1814.95	16	FALSE	3.122	1.64	2.91857e-06	0.000235674	903350	2.82067e+06	19.54	20.41	6	6	465377	265643	252358	253549	487544	422627	3.15416e+06	3057895	1.88119e+06	2.16508e+06	2.03567e+06	2.70825e+06	998351	925368	682971	693441
FALSE		High	Unambiguous	FRTEAAAAAPQR	[R].FRTEAAAAAPQR.[S]			0.003264	0.0010893	0.941	1	1	7	O95817	O95817 [122-133]			BAG family molecular chaperone regulator 3 [OS=Homo sapiens]	O95817	1	1288.68	12	FALSE	0.01	-6.64			214525		63.78		6		71695.9	138700	113084	109405	33986.7	54787.4							153806	483162	306045	299216
FALSE		High	Unambiguous	FRVDEEFQSPFASQSR	[R].FRVDEEFQSPFASQSR.[G]			0.123481	0.00860454	0.29	1	1	1	P48645	P48645 [142-157]			Neuromedin-U [OS=Homo sapiens]	P48645	1	1929.91	16	FALSE
FALSE		High	Unambiguous	FSALQQAVPTESTDNRR	[R].FSALQQAVPTESTDNRR.[V]			0.00537077	0.0010893	0.853	1	8	2	Q04637	Q04637 [1123-1139]			eukaryotic translation initiation factor 4 gamma 1 [OS=Homo sapiens]	Q04637-6; Q04637-9; Q04637; Q04637-3; Q04637-8; Q04637-4; Q04637-5; Q04637-7	1	1919.96	17	FALSE
FALSE		High	Unambiguous	FSDHVALLSVFQAWDDAR	[R].FSDHVALLSVFQAWDDAR.[M]			0.000216879	0.0010893	1.419	1	1	35	Q08211	Q08211 [912-929]			Atp-dependent rna helicase a [OS=Homo sapiens]	Q08211	0	2077.01	18	FALSE	0.01	-6.64			957868		11.94		6		382655	264250	402754	418153	415288	459026							820892	920514	1.08999e+06	1.14362e+06
FALSE		High	Unambiguous	FSDWLYTFNVRPEVVQEIPR	[R].FSDWLYTFNVRPEVVQEIPR.[D]			0.00219565	0.0010893	1.011	1	2	5	Q8IVT5-1	Q8IVT5-1 [109-128]			kinase suppressor of Ras 1 [OS=Homo sapiens]	Q8IVT5-2; Q8IVT5-1	0	2495.27	20	FALSE
FALSE		High	Unambiguous	FSEGTSADREIQR	[R].FSEGTSADREIQR.[T]			0.092357	0.00584769	0.345	1	1	3	P62333	P62333 [243-255]			26S proteasome regulatory subunit 10B [OS=Homo sapiens]	P62333	1	1495.71	13	FALSE	0.01	-6.64			137988		79.99		5		85920.6		5983.19	6709.63	59821.5	96938.4							184321		16192.6	18350.4
FALSE		High	Unambiguous	FSEPDPSHTLEER	[R].FSEPDPSHTLEER.[V]			0.0659741	0.00359603	0.407	1	2	2	Q9H4F8	Q9H4F8 [350-362]			SPARC-related modular calcium-binding protein 1 [OS=Homo sapiens]	Q9H4F8; Q9H4F8-2	0	1543.7	13	FALSE	0.01	-6.64			134392		19.88		6		59225	40808.2	40944.7	38252.3	73476.8	78942.4							127053	142155	110811	104618
FALSE		High	Unambiguous	FSFSGNTLVSSSADPEGHFETPIWIER	[R].FSFSGNTLVSSSADPEGHFETPIWIER.[V]			0.111803	0.00726596	0.309	1	2	1	Q14697-1	Q14697-1 [865-891]			Neutral alpha-glucosidase AB [OS=Homo sapiens]	Q14697-1; Q14697-2	0	3010.42	27	FALSE
FALSE		High	Unambiguous	FSFWDKDAR	[R].FSFWDKDAR.[T]			0.00988938	0.0010893	0.745	1	1	19	P78406	P78406 [297-305]			mRNA export factor [OS=Homo sapiens]	P78406	1	1171.55	9	FALSE	0.01	-6.64			1.03747e+06		33.54		6		393469	294541	701955	425939	454785	433665							844090	1.02603e+06	1.89974e+06	1.16492e+06
FALSE		High	Unambiguous	FSPLTTNLINLLAENGR	[R].FSPLTTNLINLLAENGR.[L]			1.35197e-06	0.0010893	2.313	1	1	7	P48047	P48047 [101-117]			ATP synthase subunit O, mitochondrial [OS=Homo sapiens]	P48047	0	1873.02	17	FALSE	0.01	-6.64			537341		48.3		5		436880	243047	96964.3		232952	191813							937219	846655	262420
FALSE		High	Unambiguous	FSSETWQNLGTLHR	[R].FSSETWQNLGTLHR.[L]			0.0332467	0.00194901	0.53	1	1	8	Q96IU4	Q96IU4 [43-56]			Protein ABHD14B [OS=Homo sapiens]	Q96IU4	0	1675.82	14	FALSE	0.01	-6.64			931498		26.72		6		477525	243149	417093	421453	231069	357727							1.02441e+06	847011	1.1288e+06	1.15265e+06
FALSE		High	Unambiguous	FSSSGGGGGGGRFSSSSGYGGGSSR	[R].FSSSGGGGGGGRFSSSSGYGGGSSR.[V]			0.0359694	0.00194901	0.516	1	1	5	KRT9	KRT9 [35-59]			Keratin, type I cytoskeletal 9 OS=Homo sapiens GN=KRT9 PE=1 SV=3	KRT9	1	2198.94	25	TRUE	0.01	-6.64			49749.2		42.12		5			26247.5	14454.5	12000.8	21567.6	30876.4								91433.3	39118.9	32821.5
FALSE		High	Unambiguous	FSVLLLHGIR	[R].FSVLLLHGIR.[F]			0.00115057	0.0010893	1.125	1	1	9	Q96IU4	Q96IU4 [33-42]			Protein ABHD14B [OS=Homo sapiens]	Q96IU4	0	1154.7	10	FALSE
FALSE		High	Unambiguous	FTQAGSEVSALLGR	[R].FTQAGSEVSALLGR.[I]			5.84007e-05	0.0010893	1.65	1	1	5	P06576	P06576 [311-324]			ATP synthase subunit beta, mitochondrial [OS=Homo sapiens]	P06576	0	1435.75	14	FALSE
FALSE		High	Unambiguous	FTQDTQPHYIYSPR	[R].FTQDTQPHYIYSPR.[E]			0.0279222	0.00194901	0.561	1	1	4	Q14204	Q14204 [2784-2797]			Cytoplasmic dynein 1 heavy chain 1 [OS=Homo sapiens]	Q14204	0	1752.83	14	FALSE	100	6.64				293636		53.42		6							444477	463089	260469	311706	49352.4	166305
FALSE		High	Unambiguous	FTQGRFPGLR	[R].FTQGRFPGLR.[S]			0.0963919	0.0064943	0.337	1	1	3	Q14964	Q14964 [28-37]			Ras-related protein Rab-39A [OS=Homo sapiens]	Q14964	1	1178.64	10	FALSE
FALSE		High	Unambiguous	FTWEGLYNVLMYR	[R].FTWEGLYNVLMYR.[L]			0.000104832	0.0010893	1.547	1	1	2	P51784	P51784 [626-638]			Ubiquitin carboxyl-terminal hydrolase 11 [OS=Homo sapiens]	P51784	0	1691.83	13	FALSE	0.01	-6.64			101604		61.59		6		30298.3	3264.06	35584.1	39194.9	81495.8	80550.9							64997.6	11370.4	96303.2	107196
FALSE		High	Unambiguous	FVFDRPLPVSR	[R].FVFDRPLPVSR.[L]			0.00581334	0.0010893	0.839	1	2	19	P25786-1	P25786-1 [97-107]			Proteasome subunit alpha type-1 [OS=Homo sapiens]	P25786-1; P25786-2	0	1332.74	11	FALSE	1.062	0.09	0.51642	0.697777	910280	966884	20.5	32.01	6	6	407393	214425	467428	432484	411030	414894	926565	904357	1.33285e+06	1.66785e+06	578250	845707	873962	746950	1.26503e+06	1.18282e+06
FALSE		High	Unambiguous	FVTPSEPVAHSR	[R].FVTPSEPVAHSR.[R]			0.00121082	0.0010893	1.116	1	1	18	O14654	O14654 [399-410]			insulin receptor substrate 4 [OS=Homo sapiens]	O14654	0	1326.68	12	FALSE	1.039	0.05	0.295616	0.510609	2.573e+06	2.67247e+06	57.93	52.77	6	6	2.37418e+06	2016531	973506	918771	781758	1.07041e+06	2.90894e+06	4.35567e+06	2.56569e+06	2.62122e+06	616304	1.19668e+06	5.09322e+06	7.02459e+06	2.63465e+06	2.51278e+06
FALSE		High	Unambiguous	FVWNGHLLR	[R].FVWNGHLLR.[E]			0.127388	0.00860454	0.284	1	2	1	Q9NTJ5	Q9NTJ5 [166-174]			Phosphatidylinositide phosphatase SAC1 [OS=Homo sapiens]	Q9NTJ5-2; Q9NTJ5	0	1141.63	9	FALSE	100	6.64				295517		26.23		6							428558	399305	244628	282475	186536	264266
FALSE		High	Unambiguous	FVYAGPAGSWSPFHADIFR	[R].FVYAGPAGSWSPFHADIFR.[S]			0.082489	0.00584769	0.366	1	2	2	Q9H9V9	Q9H9V9 [222-240]			JmjC domain-containing protein 4 [OS=Homo sapiens]	Q9H9V9; Q9H9V9-2	0	2125.03	19	FALSE
FALSE		High	Unambiguous	FWEVISDEHGIDPTGSYHGDSDLQLER	[K].FWEVISDEHGIDPTGSYHGDSDLQLER.[I]			0.000289731	0.0010893	1.368	1	2	13	Q9BVA1	Q9BVA1 [20-46]			Tubulin beta-2B chain [OS=Homo sapiens]	Q13885; Q9BVA1	0	3102.41	27	FALSE	100	6.64				9.36749e+06		80.61		3							9245894	4857868			2.05717e+07
FALSE		High	Unambiguous	FWEVISDEHGIDPTGTYHGDSDLQLDR	[K].FWEVISDEHGIDPTGTYHGDSDLQLDR.[I]			1.11185e-10	0.0010893	3.969	1	1	133	P07437	P07437 [20-46]			tubulin beta chain [OS=Homo sapiens]	P07437	0	3102.41	27	FALSE	58.577	5.87			37321.8	2.18621e+06		56.75	1	6		10713.9					2.10389e+06	2.14607e+06	1.20555e+06	3.25041e+06	4.49024e+06	1517510		37321.8
FALSE		High	Unambiguous	FWEVISDEHGIDPTGTYHGDSDLQLER	[K].FWEVISDEHGIDPTGTYHGDSDLQLER.[I]			6.76123e-07	0.0010893	2.435	1	2	34	P04350	P04350 [20-46]			Tubulin beta-4A chain [OS=Homo sapiens]	P04350; P68371	0	3116.42	27	FALSE	100	6.64				2.76742e+06		90.72		5							9.08904e+06	1.09645e+07		544151	1.88143e+06	2365540
FALSE		High	Unambiguous	FYEEFDAHGR	[R].FYEEFDAHGR.[E]			0.000171828	0.0010893	1.46	1	2	22	P18074-1	P18074-1 [157-166]			Tfiih basal transcription factor complex helicase xpd subunit [OS=Homo sapiens]	P18074-2; P18074-1	0	1270.55	10	FALSE	0.859	-0.22	0.0573025	0.19844	815576	700811	22.79	26.95	6	6	489539	368825	288269	291475	328277	399889	688159	790505	830848	704432	322327	454425	1.05019e+06	1.2848e+06	780158	797167
FALSE		High	Unambiguous	GAGYTFGQDISETFNHANGLTLVSR	[R].GAGYTFGQDISETFNHANGLTLVSR.[A]			0.0678083	0.00434873	0.402	1	2	2	P62714	P62714 [215-239]			serine/threonine-protein phosphatase 2A catalytic subunit beta isoform [OS=Homo sapiens]	P62714; P67775	0	2655.28	25	FALSE
FALSE		High	Unambiguous	GAQDVAGGSNPGAHNPSANLAR	[R].GAQDVAGGSNPGAHNPSANLAR.[G]			4.53299e-06	0.0010893	2.1	1	1	38	O14654	O14654 [1177-1198]			insulin receptor substrate 4 [OS=Homo sapiens]	O14654	0	2060.99	22	FALSE	0.463	-1.11	0.0119338	0.0710785	1.98889e+06	921622	45.88	57.5	6	6	1.88764e+06	953824	744234	718088	521506	791227	1.10368e+06	1.69247e+06	837801	954657	224582	401092	4.04947e+06	3.32265e+06	2.01416e+06	1.96393e+06
FALSE		High	Unambiguous	GAYGGGYGGYDDYNGYNDGYGFGSDR	[R].GAYGGGYGGYDDYNGYNDGYGFGSDR.[F]			1.52851e-05	0.0010893	1.886	1	1	7	P31943	P31943 [234-259]			Heterogeneous nuclear ribonucleoprotein H [OS=Homo sapiens]	P31943	0	2717.04	26	FALSE
FALSE		High	Unambiguous	GAYGGGYGGYDDYNGYNDGYGFGSDRFGR	[R].GAYGGGYGGYDDYNGYNDGYGFGSDRFGR.[D]			0.0481249	0.00272876	0.464	1	1	1	P31943	P31943 [234-262]			Heterogeneous nuclear ribonucleoprotein H [OS=Homo sapiens]	P31943	1	3077.24	29	FALSE
FALSE		High	Unambiguous	GDFYTAHGEDALLAAR	[R].GDFYTAHGEDALLAAR.[E]			6.0083e-05	0.0010893	1.645	1	1	24	P43246-1	P43246-1 [40-55]			DNA mismatch repair protein MSH2 [OS=Homo sapiens]	P43246-1	0	1706.81	16	FALSE	2.24	1.16	0.00166827	0.0185811	407458	912574	34.59	30.09	6	6	176791	97297	253158	266752	170928	201804	740782	778621	1331329	1.44807e+06	659096	875026	379262	338934	685135	729551
FALSE		High	Unambiguous	GDNQAGGAAAAAAAPEPPPR	[R].GDNQAGGAAAAAAAPEPPPR.[S]			0.000280026	0.0010893	1.374	1	1	2	O14654	O14654 [1199-1218]			insulin receptor substrate 4 [OS=Homo sapiens]	O14654	0	1788.86	20	FALSE	100	6.64				58008.7		88.36		5							131536	224031	54345.6	58008.7		9565.79
FALSE		High	Unambiguous	GDVEEVQGPGVVGEFPIISPGR	[K].GDVEEVQGPGVVGEFPIISPGR.[V]			8.71083e-06	0.0010893	1.985	1	3	6	Q9UK99	Q9UK99 [338-359]			F-box only protein 3 [OS=Homo sapiens]	Q9UK99-3; Q9UK99; Q9UK99-2	0	2238.14	22	FALSE
FALSE		High	Unambiguous	GEFGVYLVSDGSSRPYR	[K].GEFGVYLVSDGSSRPYR.[C]			0.000592433	0.0010893	1.242	1	2	4	O75306-1	O75306-1 [405-421]			NADH dehydrogenase [ubiquinone] iron-sulfur protein 2, mitochondrial [OS=Homo sapiens]	O75306-1; O75306-2	0	1888.92	17	FALSE
FALSE		High	Unambiguous	GEVAYIDGQVLVPPGYGQDVR	[R].GEVAYIDGQVLVPPGYGQDVR.[K]			0.0152744	0.0010893	0.668	1	1	1	P27708	P27708 [1790-1810]			CAD protein [OS=Homo sapiens]	P27708	0	2232.13	21	FALSE
FALSE		High	Unambiguous	GFFNIYHPLDPVAYR	[K].GFFNIYHPLDPVAYR.[L]			0.0500382	0.00272876	0.457	1	2	17	Q9Y6Y8	Q9Y6Y8 [816-830]			SEC23-interacting protein [OS=Homo sapiens]	Q9Y6Y8-2; Q9Y6Y8	0	1808.91	15	FALSE	0.01	-6.64			75302.2		28.72		5		35101.8	20845.9	36482.4	34579.9		20678.1							75302.2	72616.8	98734.2	94573.8
FALSE		High	Unambiguous	GFGFVTFDDHDPVDK	[R].GFGFVTFDDHDPVDK.[I]			0.0425602	0.00272876	0.486	1	2	2	P22626	P22626 [154-168]			heterogeneous nuclear ribonucleoproteins A2/B1 [OS=Homo sapiens]	P22626-2; P22626	0	1695.76	15	FALSE
FALSE		High	Unambiguous	GFGFVTFSSMAEVDAAMAARPHSIDGR	[R].GFGFVTFSSMAEVDAAMAARPHSIDGR.[V]			2.56295e-05	0.0010893	1.795	1	2	11	P22626	P22626 [63-89]			heterogeneous nuclear ribonucleoproteins A2/B1 [OS=Homo sapiens]	P22626-2; P22626	0	2827.33	27	FALSE	100	6.64				4.77289e+06		43.58		6							4.58248e+06	4696184	2.33548e+06	2329716	6065619	5383749
FALSE		High	Unambiguous	GFHQVPFAPIVFIER	[K].GFHQVPFAPIVFIER.[T]			0.000126443	0.0010893	1.514	1	2	17	P47897	P47897 [602-616]			glutamine--tRNA ligase [OS=Homo sapiens]	P47897-2; P47897	0	1756.95	15	FALSE	100	6.64				462657		35.57		5								442808	603972	695793	292388	249885
FALSE		High	Unambiguous	GFLEFVEDFIQVPR	[R].GFLEFVEDFIQVPR.[N]			7.12449e-05	0.0010893	1.615	1	3	1	P51114-1	P51114-1 [277-290]			Fragile X mental retardation syndrome-related protein 1 [OS=Homo sapiens]	P51114-1; P51114-2; P51114-3	0	1695.87	14	FALSE	0.01	-6.64			141883		19.92		6		66763.4	36428.8	64553.4	60513.6	41678.2	67360.2							143224	126900	174704	165501
FALSE		High	Unambiguous	GFLWDEGFHQLVVQR	[R].GFLWDEGFHQLVVQR.[W]			0.0475913	0.00272876	0.466	1	2	13	Q13724-1	Q13724-1 [447-461]			Mannosyl-oligosaccharide glucosidase [OS=Homo sapiens]	Q13724-2; Q13724-1	0	1830.93	15	FALSE	0.01	-6.64			147804		18.71		6		78688.1	52014.7	45530.3	41863.7	71571.8	63417.2							168806	181193	123221	114495
FALSE		High	Unambiguous	GGGGGGYGSGGSSYGSGGGSYGSGGGGGGGR	[R].GGGGGGYGSGGSSYGSGGGSYGSGGGGGGGR.[G]			0.00113759	0.0010893	1.127	1	1	1	KRT1	KRT1 [519-549]			Keratin, type II cytoskeletal 1 OS=Homo sapiens GN=KRT1 PE=1 SV=6	KRT1	0	2383.95	31	TRUE
FALSE		High	Unambiguous	GGGGPGGGGPGGGSAGGPSQPPGGGGPGIR	[R].GGGGPGGGGPGGGSAGGPSQPPGGGGPGIR.[K]			0.074408	0.00434873	0.385	1	1	1	Q92945	Q92945 [41-70]			Far upstream element-binding protein 2 [OS=Homo sapiens]	Q92945	0	2270.07	30	FALSE	0.01	-6.64			123453		43.23		3			14500.2	47348.1	45139.2										50511.5	128141	123453
FALSE		High	Unambiguous	GGSGGSHGGGSGFGGESGGSYGGGEEASGSGGGYGGGSGK	[R].GGSGGSHGGGSGFGGESGGSYGGGEEASGSGGGYGGGSGK.[S]			0.0112612	0.0010893	0.722	1	1	3	KRT9	KRT9 [580-619]			Keratin, type I cytoskeletal 9 OS=Homo sapiens GN=KRT9 PE=1 SV=3	KRT9	0	3223.28	40	TRUE	0.01	-6.64			75416.7		44.06		3		35155.2		38400.4	14523.3									75416.7		103925	39720.3
FALSE		High	Unambiguous	GHYTEGAELVDSVLDVVR	[K].GHYTEGAELVDSVLDVVR.[K]			0.000341591	0.0010893	1.339	3	6	16	Q13509; P07437; Q9BVA1	Q13509 [104-121]; P07437 [104-121]; Q9BVA1 [104-121]			tubulin beta-3 chain [OS=Homo sapiens] tubulin beta chain [OS=Homo sapiens] Tubulin beta-2B chain [OS=Homo sapiens]	Q13885; Q13509; Q13509-2; P07437; P68371; Q9BVA1	0	1958.98	18	FALSE	100	6.64				6.50771e+06		14.39		6							7.09081e+06	6.8041e+06	4.70754e+06	5.9572e+06	4.78309e+06	6.1945e+06
FALSE		High	Unambiguous	GHYTIGKEIIDLVLDR	[R].GHYTIGKEIIDLVLDR.[I]			8.83004e-07	0.0010893	2.388	2	4	56	P68363; Q9BQE3	P68363 [106-121]; Q9BQE3 [106-121]			Tubulin alpha-1B chain [OS=Homo sapiens] Tubulin alpha-1C chain [OS=Homo sapiens]	Q71U36; P68363; Q71U36-2; Q9BQE3	1	1842.01	16	FALSE	0.01	-6.64			2.37342e+06		44.65		6		1.05553e+06	814919	403047	241298	1.07848e+06	1.2028e+06							2.26439e+06	2.83877e+06	1.09079e+06	659935
FALSE		High	Unambiguous	GHYTIGKEIIDLVLDRIR	[R].GHYTIGKEIIDLVLDRIR.[K]			0.000706382	0.0010893	1.211	2	4	7	P68363; Q9BQE3	P68363 [106-123]; Q9BQE3 [106-123]			Tubulin alpha-1B chain [OS=Homo sapiens] Tubulin alpha-1C chain [OS=Homo sapiens]	Q71U36; P68363; Q71U36-2; Q9BQE3	2	2111.2	18	FALSE	0.01	-6.64			886638		58.87		5		466399	477360		88849.2	277875	424919							1.00054e+06	1.66288e+06		242997
FALSE		High	Unambiguous	GKYYAVNYPLR	[K].GKYYAVNYPLR.[D]			0.0811613	0.00514875	0.369	1	1	1	Q13547	Q13547 [219-229]			histone deacetylase 1 [OS=Homo sapiens]	Q13547	1	1343.71	11	FALSE
FALSE		High	Unambiguous	GLDISHISQR	[R].GLDISHISQR.[L]			0.0475913	0.00272876	0.466	1	1	8	Q8N1F7-1	Q8N1F7-1 [68-77]			Nuclear pore complex protein Nup93 [OS=Homo sapiens]	Q8N1F7-1	0	1125.6	10	FALSE	100	6.64				946079		3.32		2									912006	924144
FALSE		High	Unambiguous	GIEQAVQSHAVAEEEAR	[R].GIEQAVQSHAVAEEEAR.[K]			0.114777	0.00860454	0.304	1	4	1	Q16891	Q16891 [548-564]			MICOS complex subunit Mic60 [OS=Homo sapiens]	Q16891-4; Q16891-2; Q16891-3; Q16891	0	1823.89	17	FALSE
FALSE		High	Unambiguous	GLFIIDDKGILR	[R].GLFIIDDKGILR.[Q]			0.00546268	0.0010893	0.85	1	2	39	Q13162	Q13162 [201-212]			Peroxiredoxin-4 [OS=Homo sapiens]	Q13162; PRDX1	1	1359.8	12	TRUE	1.314	0.39	0.874589	0.94164	1.20106e+06	1.57769e+06	52.55	79.99	5	6	596481	344786	29073.3		574235	501326	3005923	1.68285e+06	166475	99071.8	1.5587e+06	1.21006e+06	1.2796e+06	1.20106e+06	78682.8
FALSE		High	Unambiguous	GLGGEVPGSHQGPDPYR	[R].GLGGEVPGSHQGPDPYR.[Q]			0.090884	0.00584769	0.348	1	1	5	Q6UW68	Q6UW68 [125-141]			Transmembrane protein 205 [OS=Homo sapiens]	Q6UW68	0	1722.82	17	FALSE
FALSE		High	Unambiguous	GIGLAAQDILHNNPSSQR	[K].GIGLAAQDILHNNPSSQR.[A]			0.000118112	0.0010893	1.526	1	2	3	Q7RTP0	Q7RTP0 [208-225]			Magnesium transporter NIPA1 [OS=Homo sapiens]	Q7RTP0-2; Q7RTP0	0	1890.98	18	FALSE
FALSE		High	Unambiguous	GIHPTIISESFQK	[K].GIHPTIISESFQK.[A]			0.0856652	0.00584769	0.359	1	2	4	P50991	P50991 [127-139]			T-complex protein 1 subunit delta [OS=Homo sapiens]	P50991; P50991-2	0	1456.78	13	FALSE	0.01	-6.64			257708		30.3		6		111579	79648.9	119550	104873	66181.6	72368.5							239365	277457	323544	286820
FALSE		High	Unambiguous	GLHSQNFTQALLER	[R].GLHSQNFTQALLER.[M]			0.00028809	0.0010893	1.369	1	3	23	Q9Y4W2	Q9Y4W2 [388-401]			Ribosomal biogenesis protein LAS1L [OS=Homo sapiens]	Q9Y4W2-3; Q9Y4W2-2; Q9Y4W2	0	1613.84	14	FALSE	0.01	-6.64			238832		23.13		6		166314	85055.6	80249.8	71633.9	108682	109044							356786	296291	217185	195914
FALSE		High	Unambiguous	GIHVEVPPAEAER	[R].GIHVEVPPAEAER.[L]			0.00913736	0.0010893	0.759	1	2	3	P38117	P38117 [86-98]			electron transfer flavoprotein subunit beta [OS=Homo sapiens]	P38117; P38117-2	0	1403.73	13	FALSE
FALSE		High	Unambiguous	GILHTDSQSQSLR	[R].GILHTDSQSQSLR.[N]			0.0119153	0.0010893	0.712	1	1	3	Q15678	Q15678 [455-467]			Tyrosine-protein phosphatase non-receptor type 14 [OS=Homo sapiens]	Q15678	0	1441.74	13	FALSE	0.01	-6.64			211461		23.95		2		83075.3	72026.6											178217	250905
FALSE		High	Unambiguous	GLLSSLDHTSIR	[R].GLLSSLDHTSIR.[R]			0.106623	0.0064943	0.318	1	1	4	P08574	P08574 [100-111]			Cytochrome c1, heme protein, mitochondrial [OS=Homo sapiens]	P08574	0	1298.71	12	FALSE
FALSE		High	Unambiguous	GLIVYQLENQPSEFRR	[R].GLIVYQLENQPSEFRR.[I]			0.00243136	0.0010893	0.993	1	1	6	P78406	P78406 [191-206]			mRNA export factor [OS=Homo sapiens]	P78406	1	1949.02	16	FALSE
FALSE		High	Unambiguous	GISHVIVDEIHER	[R].GISHVIVDEIHER.[D]			8.89113e-05	0.0010893	1.576	1	1	10	Q08211	Q08211 [504-516]			Atp-dependent rna helicase a [OS=Homo sapiens]	Q08211	0	1503.79	13	FALSE	100	6.64				555911		60.98		5							487575	532061	1.17437e+06	1.32453e+06	222026
FALSE		High	Unambiguous	GLSQEGTGPPTSAGEGHSR	[R].GLSQEGTGPPTSAGEGHSR.[T]			0.0486643	0.00272876	0.462	1	3	2	Q63HN8-4	Q63HN8-4 [264-282]			Isoform 2 of E3 ubiquitin-protein ligase RNF213 [OS=Homo sapiens]	Q63HN8-3; Q63HN8-4; Q63HN8-5	0	1824.85	19	FALSE	0.01	-6.64			69459.3				1			19939.5												69459.3
FALSE		High	Unambiguous	GITINAAHVEYSTAAR	[R].GITINAAHVEYSTAAR.[H]			1.47221e-06	0.0010893	2.298	1	1	61	P49411	P49411 [105-120]			elongation factor Tu, mitochondrial [OS=Homo sapiens]	P49411	0	1673.86	16	FALSE	0.87	-0.2	0.3363	0.568716	3.72816e+06	3.24297e+06	17.19	39.67	6	6	1.44946e+06	1.24205e+06	1.25715e+06	1.12573e+06	1.97933e+06	1.95784e+06	4.60957e+06	4.44545e+06	2.72687e+06	2333764	1.15566e+06	3.10426e+06	3.10946e+06	4.32669e+06	3.4023e+06	3.07879e+06
FALSE		High	Unambiguous	GIYAYGFEKPSAIQQR	[R].GIYAYGFEKPSAIQQR.[A]			0.0494842	0.00272876	0.459	1	5	1	P38919	P38919 [52-67]			Eukaryotic initiation factor 4A-III [OS=Homo sapiens]	P60842-2; P60842; Q14240-2; P38919; Q14240-1	0	1827.94	16	FALSE
FALSE		High	Unambiguous	GMDEVYNLFYVNNNWYIFMR	[R].GMDEVYNLFYVNNNWYIFMR.[L]			0.000310161	0.0010893	1.356	1	1	6	Q96ST3	Q96ST3 [878-897]			Paired amphipathic helix protein Sin3a [OS=Homo sapiens]	Q96ST3	0	2588.17	20	FALSE	0.01	-6.64			68931.7		26.64		5		27608.8		20380.3	37843.9	29883.7	39887.9							59227.9		55156.4	103501
FALSE		High	Unambiguous	GMSEEEVFTEVANLFR	[R].GMSEEEVFTEVANLFR.[G]			0.000208427	0.0010893	1.426	1	3	2	O75182-1	O75182-1 [207-222]			paired amphipathic helix protein sin3b [OS=Homo sapiens]	O75182-2; O75182-3; O75182-1	0	1857.87	16	FALSE
FALSE		High	Unambiguous	GNFGGSFAGSFGGAGGHAPGVAR	[R].GNFGGSFAGSFGGAGGHAPGVAR.[K]			0.000147399	0.0010893	1.487	1	2	14	P52272	P52272 [628-650]			Heterogeneous nuclear ribonucleoprotein M [OS=Homo sapiens]	P52272-2; P52272	0	2034.95	23	FALSE	0.01	-6.64			1.37074e+06		17.55		6		759508	456123	432987	380922	644071	606112							1.62934e+06	1.5889e+06	1.17182e+06	1.0418e+06
FALSE		High	Unambiguous	GPAWVGSHGVLQHTQGLPADR	[R].GPAWVGSHGVLQHTQGLPADR.[G]			1.91179e-06	0.0010893	2.252	1	1	17	Q15654-1	Q15654-1 [65-85]			thyroid receptor-interacting protein 6 [OS=Homo sapiens]	Q15654-1	0	2183.11	21	FALSE	0.01	-6.64			401836		77.96		6		149545	83994.1	499488	543510	191413	175268							320811	292594	1.35179e+06	1.48647e+06
FALSE		High	Unambiguous	GPSWDPFRDWYPHSR	[R].GPSWDPFRDWYPHSR.[L]			0.114777	0.00860454	0.304	1	1	7	P04792	P04792 [13-27]			Heat shock protein beta-1 [OS=Homo sapiens]	P04792	1	1902.87	15	FALSE	100	6.64				775009		54.06		5							1.42681e+06	1.53812e+06		351135	628268	609112
FALSE		High	Unambiguous	GPYESGSGHSSGLGHR	[R].GPYESGSGHSSGLGHR.[E]			0.000171828	0.0010893	1.46	1	1	11	HRNR	HRNR [1038-1053]; [1978-1993]; [2448-2463]			Hornerin OS=Homo sapiens GN=HRNR PE=1 SV=2	HRNR	0	1584.71	16	TRUE	0.453	-1.14	0.50421	0.697777	738027	334156	78.85	93.96	4	6			610069	589410	120573	161935	248831	323203	1.2555e+06	1.5916e+06	122593	282641			1.65106e+06	1.612e+06
FALSE		High	Unambiguous	GQLQEAIEHYR	[R].GQLQEAIEHYR.[H]			0.00218324	0.0010893	1.012	1	2	28	O15294	O15294 [103-113]			UDP-N-acetylglucosamine--peptide N-acetylglucosaminyltransferase 110 kDa subunit [OS=Homo sapiens]	O15294; O15294-3	0	1343.67	11	FALSE	1.572	0.65	0.949762	0.972272	3.62368e+06	5.69565e+06	16.43	51.86	6	5	1765611	948931	1.28098e+06	1.21066e+06	2.09672e+06	2.10221e+06	4.56242e+06	5.4513e+06	601932		4.66089e+06	6.0878e+06	3.78768e+06	3.3056e+06	3.46678e+06	3.31107e+06
FALSE		High	Unambiguous	GQRVPLYLSK	[R].GQRVPLYLSK.[A]			5.03829e-05	0.0010893	1.676	1	1	33	Q8TEE9	Q8TEE9 [92-101]			Histone deacetylase complex subunit SAP25 [OS=Homo sapiens]	Q8TEE9	1	1160.68	10	FALSE	0.714	-0.49	0.860883	0.933105	8.16378e+06	5.82842e+06	77.9	82.12	6	6	6267349	4.10948e+06	264324	265219	3.7028e+06	3739629	11207396	12317553	754905	720982	4053000	5.80789e+06	1.3445e+07	1.43154e+07	715354	725356
FALSE		High	Unambiguous	GQVQEVGWHDVAGWLGR	[K].GQVQEVGWHDVAGWLGR.[G]			3.6198e-07	0.0010893	2.545	1	2	60	P17858-1	P17858-1 [445-461]			ATP-dependent 6-phosphofructokinase, liver type [OS=Homo sapiens]	P17858-1; P17858-2	0	1893.94	17	FALSE	0.639	-0.65	0.0308973	0.140561	849464	543030	17.02	38.26	6	5	412563	234048	233992	241452	426513	424380	563214	519733		195647	274494	491075	885052	815307	633265	660356
FALSE		High	Unambiguous	GRPLAEESEQER	[R].GRPLAEESEQER.[L]			0.000630595	0.0010893	1.231	1	1	9	Q8N357	Q8N357 [347-358]			Solute carrier family 35 member F6 [OS=Homo sapiens]	Q8N357	0	1400.68	12	FALSE	0.01	-6.64			498908		61.27		6		116448	310043	287626	310341	107724	153245							249811	1.08004e+06	778418	848763
FALSE		High	Unambiguous	GRQPGAPGGPQPPGSDR	[R].GRQPGAPGGPQPPGSDR.[N]			0.00745535	0.0010893	0.795	1	1	9	Q9BX95	Q9BX95 [57-73]			Sphingosine-1-phosphate phosphatase 1 [OS=Homo sapiens]	Q9BX95	1	1630.8	17	FALSE	0.01	-6.64			73543.4		67.84		6		25068.1	56374.2	37162.3	38282.5	15926.2	19694.3							53777.4	196380	100574	104700
FALSE		High	Unambiguous	GSAVHQLSEELR	[R].GSAVHQLSEELR.[C]			0.0894326	0.00584769	0.351	1	1	4	P58107	P58107 [2421-2432]; [2955-2966]; [3489-3500]; [4023-4034]; [4557-4568]			epiplakin [OS=Homo sapiens]	P58107	0	1325.68	12	FALSE	100	6.64				113440		75.11		5							226535	234689	57225.7	113440		16795.8
FALSE		High	Unambiguous	GSGGGGPASASGPAASESRPLPR	[R].GSGGGGPASASGPAASESRPLPR.[V]			0.000901552	0.0010893	1.168	1	1	3	Q9Y6J9	Q9Y6J9 [504-526]			TAF6-like RNA polymerase II p300/CBP-associated factor-associated factor 65 kDa subunit 6L [OS=Homo sapiens]	Q9Y6J9	0	2023	23	FALSE	0.01	-6.64			82979.1		86.73		2		79004.8					19470							169485
FALSE		High	Unambiguous	GSGSGQSPSSGQHGTGFGR	[R].GSGSGQSPSSGQHGTGFGR.[S]			0.134832	0.00935831	0.273	1	1	3	HRNR	HRNR [430-448]			Hornerin OS=Homo sapiens GN=HRNR PE=1 SV=2	HRNR	0	1747.77	19	TRUE	0.01	-6.64			97920.9		71.12		5			28109.9	39871.6	39673.6	5928.76	8273.03								97920.9	107907	108505
FALSE		High	Unambiguous	GSLGGGFSSGGFSGGSFSR	[K].GSLGGGFSSGGFSGGSFSR.[G]			0.0393496	0.00194901	0.5	1	1	3	KRT10	KRT10 [41-59]			Keratin, type I cytoskeletal 10 OS=Homo sapiens GN=KRT10 PE=1 SV=6	KRT10	0	1707.77	19	TRUE
FALSE		High	Unambiguous	GSLREDDLVSPDALSTVR	[R].GSLREDDLVSPDALSTVR.[E]			0.10384	0.0064943	0.323	1	1	4	Q9ULE6	Q9ULE6 [482-499]			paladin [OS=Homo sapiens]	Q9ULE6	1	1929.99	18	FALSE
FALSE		High	Unambiguous	GSYGSGGSSYGSGGGSYGSGGGGGGHGSYGSGSSSGGYR	[R].GSYGSGGSSYGSGGGSYGSGGGGGGHGSYGSGSSSGGYR.[G]			5.30149e-10	0.0010893	3.694	1	1	104	KRT1	KRT1 [550-588]			Keratin, type II cytoskeletal 1 OS=Homo sapiens GN=KRT1 PE=1 SV=6	KRT1	0	3312.31	39	TRUE	0.523	-0.94	0.0468857	0.178166	2.19206e+06	1.14639e+06	44.51	34.94	6	6	573852	671440	1.3289e+06	1.03463e+06	444384	984557	1.16144e+06	1.48426e+06	1.59488e+06	1116842	444933	833773	1.23106e+06	2.33896e+06	3.59648e+06	2.82965e+06
FALSE		High	Unambiguous	GTEDITSPHGIPLDLLDR	[R].GTEDITSPHGIPLDLLDR.[V]			4.92511e-05	0.0010893	1.68	1	2	47	Q9Y265	Q9Y265 [340-357]			RuvB-like 1 [OS=Homo sapiens]	Q9Y265; Q9Y265-2	0	1949	18	FALSE	0.474	-1.08	0.0832457	0.240307	2.41367e+06	1.14303e+06	33.19	64.26	6	5	1.12883e+06	648688	1.61625e+06	1.49236e+06	1.04295e+06	1.07946e+06		149360	1877322	2241561	926610	837511	2.42162e+06	2.2597e+06	4.37415e+06	4.08151e+06
FALSE		High	Unambiguous	GTLDEEDEEADSDTDDIDHR	[R].GTLDEEDEEADSDTDDIDHR.[V]			0.0712309	0.00434873	0.393	1	5	2	Q9HCN4	Q9HCN4 [327-346]			GPN-loop GTPase 1 [OS=Homo sapiens]	Q9HCN4; Q9HCN4-4; Q9HCN4-3; Q9HCN4-2; Q9HCN4-5	0	2276.89	20	FALSE	0.01	-6.64			68917.6		36.06		5		32125.6	11505.7	35436.2	30417.1		21576.2							68917.6	40080.2	95902.9	83188.8
FALSE		High	Unambiguous	GTSYQSPHGIPIDLLDR	[R].GTSYQSPHGIPIDLLDR.[L]			0.00250121	0.0010893	0.988	1	2	27	Q9Y230	Q9Y230 [337-353]			RuvB-like 2 [OS=Homo sapiens]	Q9Y230; Q9Y230-2	0	1868.95	17	FALSE	0.01	-6.64			571276		62.54		6		276358	158025	595926	540292	214307	202203							592857	550480	1.61279e+06	1.47767e+06
FALSE		High	Unambiguous	GVDLFESFFPYQVTER	[R].GVDLFESFFPYQVTER.[G]			0.092357	0.00584769	0.345	1	4	2	Q9H974-1	Q9H974-1 [267-282]			Queuine tRNA-ribosyltransferase accessory subunit 2 [OS=Homo sapiens]	Q9H974-3; Q9H974-1; Q9H974-4; Q9H974-2	0	1933.93	16	FALSE
FALSE		High	Unambiguous	GVVDSEDIPLNLSR	[R].GVVDSEDIPLNLSR.[E]			0.000464135	0.0010893	1.285	3	5	8	P07900; P08238; Q12931	P07900 [387-400]; P08238 [379-392]; Q12931 [389-402]			Heat shock protein HSP 90-alpha [OS=Homo sapiens] Heat shock protein HSP 90-beta [OS=Homo sapiens] heat shock protein 75 kDa, mitochondrial [OS=Homo sapiens]	P07900-2; P07900; P08238; Q12931; Q12931-2	0	1513.79	14	FALSE
FALSE		High	Unambiguous	HDQMLSVHDIR	[R].HDQMLSVHDIR.[L]			0.00428302	0.0010893	0.893	1	2	2	Q13114-1	Q13114-1 [388-398]			TNF receptor-associated factor 3 [OS=Homo sapiens]	Q13114-1; Q13114-2	0	1350.66	11	FALSE	0.01	-6.64			118077		7.53		2				46017	40933.6											124538	111951
FALSE		High	Unambiguous	HDSATDTIDIAPNHR	[R].HDSATDTIDIAPNHR.[V]			0.111216	0.00726596	0.31	1	3	1	P36897	P36897 [358-372]			TGF-beta receptor type-1 [OS=Homo sapiens]	P36897-2; P36897; P36897-3	0	1662.78	15	FALSE
FALSE		High	Unambiguous	HFSVEGQLEFR	[K].HFSVEGQLEFR.[A]			2.4491e-05	0.0010893	1.803	2	6	261	P07900; P08238	P07900 [328-338]; P08238 [320-330]			Heat shock protein HSP 90-alpha [OS=Homo sapiens] Heat shock protein HSP 90-beta [OS=Homo sapiens]	P07900-2; P07900; P08238; Q14568; Q58FF7; Q58FG1	0	1348.66	11	FALSE	1.209	0.27	0.200944	0.413906	668156	807844	30.05	39.24	6	6	321783	185652	271316	338668	149290	261066	1.0271e+06	533541	523470	851955	620979	1.24859e+06	690305	646718	734279	926236
FALSE		High	Unambiguous	HGGGGGGFGGGGFGSR	[R].HGGGGGGFGGGGFGSR.[S]			3.11587e-06	0.0010893	2.166	1	1	17	KRT2	KRT2 [46-61]			Keratin, type II cytoskeletal 2 epidermal OS=Homo sapiens GN=KRT2 PE=1 SV=2	KRT2	0	1320.58	16	TRUE	2.126	1.09	0.23064	0.446089	307617	654013	82.48	3.63	4	2			283532	257847	49116.3	64308.9			631861	637431					767338	705195
FALSE		High	Unambiguous	HGSGSGQSSSYGPYGSGSGWSSSR	[R].HGSGSGQSSSYGPYGSGSGWSSSR.[G]			0.000480215	0.0010893	1.279	1	1	5	HRNR	HRNR [1954-1977]			Hornerin OS=Homo sapiens GN=HRNR PE=1 SV=2	HRNR	0	2318.97	24	TRUE
FALSE		High	Unambiguous	HGSGSGQSSSYSPYGSGSGWSSSR	[R].HGSGSGQSSSYSPYGSGSGWSSSR.[G]			0.0748143	0.00434873	0.384	1	1	1	HRNR	HRNR [1484-1507]; [2424-2447]			Hornerin OS=Homo sapiens GN=HRNR PE=1 SV=2	HRNR	0	2348.98	24	TRUE
FALSE		High	Unambiguous	HLEINPDHPIVETLR	[K].HLEINPDHPIVETLR.[Q]			0.00240397	0.0010893	0.995	1	1	13	P08238	P08238 [625-639]			Heat shock protein HSP 90-beta [OS=Homo sapiens]	P08238	0	1782.95	15	FALSE
FALSE		High	Unambiguous	HLEINPDHSIIETLR	[K].HLEINPDHSIIETLR.[Q]			1.21096e-05	0.0010893	1.927	1	2	74	P07900	P07900 [633-647]			Heat shock protein HSP 90-alpha [OS=Homo sapiens]	P07900-2; P07900	0	1786.94	15	FALSE
FALSE		High	Unambiguous	HLPVEPEELQR	[R].HLPVEPEELQR.[R]			0.00977828	0.0010893	0.747	1	3	4	Q9H7H0	Q9H7H0 [98-108]			Methyltransferase-like protein 17, mitochondrial [OS=Homo sapiens]	Q9H7H0-2; Q9H7H0; Q9H7H0-3	0	1346.71	11	FALSE
FALSE		High	Unambiguous	HNIVFGDYTWTEFDEPFLTR	[R].HNIVFGDYTWTEFDEPFLTR.[N]			8.27673e-06	0.0010893	1.994	1	2	28	Q15645	Q15645 [49-68]			Pachytene checkpoint protein 2 homolog [OS=Homo sapiens]	Q15645-2; Q15645	0	2487.16	20	FALSE	0.01	-6.64			2.35945e+06		9.44		6		1.04686e+06	678252	1.0048e+06	1.02943e+06	1.01478e+06	1.12921e+06							2.24578e+06	2.36269e+06	2.71935e+06	2.81542e+06
FALSE		High	Unambiguous	HPWIVHWDQLPQYQLNR	[R].HPWIVHWDQLPQYQLNR.[Q]			0.00182116	0.0010893	1.044	1	1	17	P51812	P51812 [676-692]			Ribosomal protein S6 kinase alpha-3 [OS=Homo sapiens]	P51812	0	2230.13	17	FALSE
FALSE		High	Unambiguous	HQVLFIADEIQTGLAR	[R].HQVLFIADEIQTGLAR.[T]			0.000871382	0.0010893	1.174	1	2	12	P04181-1	P04181-1 [256-271]			Ornithine aminotransferase, mitochondrial [OS=Homo sapiens]	P04181-2; P04181-1	0	1810.98	16	FALSE	100	6.64				1.73834e+06		37.93		6							2224478	2.04026e+06	760838	920017	1.40052e+06	1495099
FALSE		High	Unambiguous	HSDLPPLNPTSWWADLR	[R].HSDLPPLNPTSWWADLR.[A]			0.00237689	0.0010893	0.997	1	4	1	Q9H2V7	Q9H2V7 [249-265]			Protein spinster homolog 1 [OS=Homo sapiens]	Q9H2V7-4; Q9H2V7-3; Q9H2V7-2; Q9H2V7	0	2004.99	17	FALSE
FALSE		High	Unambiguous	HSLASSEYPVR	[R].HSLASSEYPVR.[R]			0.00359376	0.0010893	0.924	1	2	18	P51570	P51570 [229-239]			galactokinase [OS=Homo sapiens]	P51570; P51570-2	0	1245.62	11	FALSE	1.792	0.84	0.55262	0.711141	349490	626264	44.68	61.73	5	5	293893	85603.1	129137	151887		85662.3	437562	599396	969431	969311	69124.6		630475	298198	349490	415400
FALSE		High	Unambiguous	HSLASSEYPVRR	[R].HSLASSEYPVRR.[R]			0.0219139	0.00194901	0.604	1	2	28	P51570	P51570 [229-240]			galactokinase [OS=Homo sapiens]	P51570; P51570-2	1	1401.72	12	FALSE	0.01	-6.64			906484		31.35		6		398871	380397	403149	351125	247265	302801							855678	1.32511e+06	1.09106e+06	960306
FALSE		High	Unambiguous	HSIDITSELWNDELQSR	[R].HSIDITSELWNDELQSR.[K]			0.0175879	0.0010893	0.643	1	2	2	Q5PSV4	Q5PSV4 [173-189]			Breast cancer metastasis-suppressor 1-like protein [OS=Homo sapiens]	Q5PSV4-2; Q5PSV4	0	2042.98	17	FALSE
FALSE		High	Unambiguous	HSQFIGYPITLFVEK	[K].HSQFIGYPITLFVEK.[KE]			5.48635e-05	0.0010893	1.661	1	3	8	P07900	P07900 [210-224]			Heat shock protein HSP 90-alpha [OS=Homo sapiens]	Q58FG0; P07900-2; P07900	0	1778.95	15	FALSE
FALSE		High	Unambiguous	HTFSGVASVESSSGEAFHVGK	[R].HTFSGVASVESSSGEAFHVGK.[T]			0.000258626	0.0010893	1.388	1	1	15	AHSG	AHSG [313-333]			Alpha-2-HS-glycoprotein OS=Bos taurus GN=AHSG PE=1 SV=2	AHSG	0	2120	21	TRUE	0.01	-6.64			509984				1			146400												509984
FALSE		High	Unambiguous	HTGPNSPDTANDGFVR	[K].HTGPNSPDTANDGFVR.[L]			0.000195805	0.0010893	1.437	2	2	10	P31943; P55795	P31943 [99-114]; P55795 [99-114]			Heterogeneous nuclear ribonucleoprotein H [OS=Homo sapiens] heterogeneous nuclear ribonucleoprotein H2 [OS=Homo sapiens]	P31943; P55795	0	1684.77	16	FALSE	0.01	-6.64			136231		58.19		5		7743.26		76589.4	69846.1	45115.4	65288.6							16611.2		207278	191025
FALSE		High	Unambiguous	HTLADNFNPVSEER	[R].HTLADNFNPVSEER.[G]			0.0363758	0.00194901	0.514	1	1	2	P20645	P20645 [148-161]			Cation-dependent mannose-6-phosphate receptor [OS=Homo sapiens]	P20645	0	1628.77	14	FALSE	0.01	-6.64			34035.1		48.2		6		13415.2	9008.2	30218.1	23145.9	13330.1	17691.3							28778.9	31380.1	81781	63302.7
FALSE		High	Unambiguous	HVGMAVAGLLADAR	[R].HVGMAVAGLLADAR.[S]			6.82323e-06	0.0010893	2.028	1	2	23	P25788-1	P25788-1 [73-86]			Proteasome subunit alpha type-3 [OS=Homo sapiens]	P25788-2; P25788-1	0	1380.74	14	FALSE	0.216	-2.21	0.237449	0.448241	2.63268e+06	567904	61.94	94.49	6	4	233141	90822.4	1.07712e+06	1.04822e+06	1.09084e+06	1.32011e+06	226071	108759			1.14148e+06	1.50319e+06	500146	316380	2.91508e+06	2.86682e+06
FALSE		High	Unambiguous	HYNGEAYEDDEHHPR	[R].HYNGEAYEDDEHHPR.[G]			0.000363605	0.0010893	1.328	1	1	34	P31689-1	P31689-1 [375-389]			DnaJ homolog subfamily A member 1 [OS=Homo sapiens]	P31689-1	0	1868.76	15	FALSE	0.01	-6.64			79985.5		48.65		5			33358.7	20778.2	9676.79	48971.5	38332.9								116205	56233.2	26465.4
FALSE		High	Unambiguous	KDAEAWFNEK	[R].KDAEAWFNEK.[S]			0.0884768	0.00584769	0.353	1	2	11	KRT10	KRT10 [334-343]			Keratin, type I cytoskeletal 10 OS=Homo sapiens GN=KRT10 PE=1 SV=6	KRT28; KRT10	1	1237.58	10	TRUE	1.042	0.06	0.87223	0.94164	842924	877970	16.76	24.26	6	6	418856	291096	244615	377120	339098	378960	1.02455e+06	1.13933e+06	799474	893548	438713	737388	898552	1.01403e+06	662016	1.0314e+06
FALSE		High	Unambiguous	KDFALDSEESR	[R].KDFALDSEESR.[M]			0.000823323	0.0010893	1.184	1	4	4	A5YKK6	A5YKK6 [1426-1436]			CCR4-NOT transcription complex subunit 1 [OS=Homo sapiens]	A5YKK6-2; A5YKK6; A5YKK6-4; A5YKK6-3	1	1296.61	11	FALSE
FALSE		High	Unambiguous	KDSETGENIR	[R].KDSETGENIR.[Q]			0.000443529	0.0010893	1.293	1	1	21	P38646	P38646 [625-634]			Stress-70 protein, mitochondrial [OS=Homo sapiens]	P38646	1	1148.55	10	FALSE	0.672	-0.57	0.859156	0.933105	1.00337e+06	673905	90.02	105.04	6	6	323306	1.13346e+06	1.15773e+06	530740	170811	219169	556471	770971	3.9587e+06	3656121	289026	402850	693573	3.94842e+06	3.13323e+06	1.45154e+06
FALSE		High	Unambiguous	KFDVNTSAVQVLIEHIGNLDR	[R].KFDVNTSAVQVLIEHIGNLDR.[A]			0.00463613	0.0010893	0.879	1	2	6	Q00610-1	Q00610-1 [1074-1094]			Clathrin heavy chain 1 [OS=Homo sapiens]	Q00610-1; Q00610-2	1	2368.26	21	FALSE	0.01	-6.64			292589		47.88		3				108112	127131	50484.2										292589	347694
FALSE		High	Unambiguous	KLDLWMLPEILIIHLK	[K].KLDLWMLPEILIIHLK.[R]			2.39118e-07	0.0010893	2.618	1	1	3	P51784	P51784 [814-829]			Ubiquitin carboxyl-terminal hydrolase 11 [OS=Homo sapiens]	P51784	1	1975.18	16	FALSE	100	6.64				2.73803e+06		12.22		2									2364320	2985750
FALSE		High	Unambiguous	KLDPGSEETQTLVR	[R].KLDPGSEETQTLVR.[E]			0.00111208	0.0010893	1.131	1	2	2	P26641	P26641 [401-414]			elongation factor 1-gamma [OS=Homo sapiens]	P26641; P26641-2	1	1572.82	14	FALSE	0.01	-6.64			796897		20.07		6		485605	324977	290198	295649	298795	367153							1.04175e+06	1.13206e+06	785380	808582
FALSE		High	Unambiguous	KLEAAEDIAYQLSR	[R].KLEAAEDIAYQLSR.[S]			0.0031909	0.0010893	0.945	1	1	1	P35232	P35232 [240-253]			Prohibitin [OS=Homo sapiens]	P35232	1	1606.84	14	FALSE
FALSE		High	Unambiguous	KIEEIKDFLLTAR	[R].KIEEIKDFLLTAR.[R]			0.0222876	0.00194901	0.601	1	1	5	P63173	P63173 [4-16]			60s ribosomal protein l38 [OS=Homo sapiens]	P63173	2	1575.91	13	FALSE	0.01	-6.64			144812		25.9		6		82226.8	48739.4	36941.5	34697.4	70403.3	61885.9							176397	169784	99976.8	94895.3
FALSE		High	Unambiguous	KNLQEEIDALESR	[K].KNLQEEIDALESR.[V]			0.000113508	0.0010893	1.533	1	1	19	Q9NQP4	Q9NQP4 [92-104]			Prefoldin subunit 4 [OS=Homo sapiens]	Q9NQP4	1	1544.79	13	FALSE	100	6.64				658532		67.87		6							616979	1.23772e+06	653269	1.73456e+06	277980	265956
FALSE		High	Unambiguous	KPLVIIAEDVDGEALSTLVLNR	[R].KPLVIIAEDVDGEALSTLVLNR.[L]			0.00223328	0.0010893	1.008	1	1	6	P10809	P10809 [269-290]			60 kDa heat shock protein, mitochondrial [OS=Homo sapiens]	P10809	0	2365.33	22	FALSE	100	6.64				1.51233e+06		54.21		5							1.4927e+06	568535		946069	1.96854e+06	2177242
FALSE		High	Unambiguous	KQALYEYAR	[R].KQALYEYAR.[R]			0.120308	0.00860454	0.295	1	2	2	Q9Y679-1	Q9Y679-1 [456-464]			Ancient ubiquitous protein 1 [OS=Homo sapiens]	Q9Y679-2; Q9Y679-1	1	1141.6	9	FALSE	0.01	-6.64			380482		19.07		2		154853	125099											332200	435783
FALSE		High	Unambiguous	KQLFTLQTVNSNGTSDR	[R].KQLFTLQTVNSNGTSDR.[T]			0.00276968	0.0010893	0.97	1	1	8	P51784	P51784 [714-730]			Ubiquitin carboxyl-terminal hydrolase 11 [OS=Homo sapiens]	P51784	1	1908.98	17	FALSE	0.01	-6.64			239277		32.61		6		117124	65412.8	50420.7	45250.3	129331	124039							251260	227865	136457	123757
FALSE		High	Unambiguous	KSDIDEIVLVGGSTR	[K].KSDIDEIVLVGGSTR.[I]			0.0953684	0.0064943	0.339	1	1	1	P11021	P11021 [353-367]			78 kDa glucose-regulated protein [OS=Homo sapiens]	P11021	1	1588.85	15	FALSE
FALSE		High	Unambiguous	KTEVLMENFR	[K].KTEVLMENFR.[R]			0.00546268	0.0010893	0.85	1	2	4	Q9Y265	Q9Y265 [108-117]			RuvB-like 1 [OS=Homo sapiens]	Q9Y265; Q9Y265-2	1	1266.65	10	FALSE	0.01	-6.64			87253.9		115.69		6		19821.7	7578.59	219030	215578	38839.5	40726.1							42522.6	26400	592774	589593
FALSE		High	Unambiguous	KTQYEEHIYR	[K].KTQYEEHIYR.[C]			0.000451147	0.0010893	1.29	1	1	87	Q96ST3	Q96ST3 [602-611]			Paired amphipathic helix protein Sin3a [OS=Homo sapiens]	Q96ST3	1	1366.67	10	FALSE	0.609	-0.72	0.365146	0.593615	666148	405438	56.76	101.01	6	4	153931	353214	342149	531184	207758	220623			958159	1.23733e+06	5993.37	138086	330222	1.23042e+06	925976	1.45276e+06
FALSE		High	Unambiguous	KYEDEINKR	[K].KYEDEINKR.[T]			0.0310756	0.00194901	0.542	1	4	7	KRT2	KRT2 [267-275]			Keratin, type II cytoskeletal 2 epidermal OS=Homo sapiens GN=KRT2 PE=1 SV=2	Krt2; KRT2; KRT76; KRT3	2	1194.61	9	TRUE	0.01	-6.64			895309		75.26		6		241418	414783	1.01952e+06	689562	167674	265870							517903	1.4449e+06	2.7592e+06	1.88591e+06
FALSE		High	Unambiguous	LAADEDDDDDDEEDDDEDDDDDDFDDEEAEEKAPVKK	[K].LAADEDDDDDDEEDDDEDDDDDDFDDEEAEEKAPVKK.[GS]			0.00762582	0.0010893	0.791	1	3	4	P06748	P06748 [158-194]			Nucleophosmin [OS=Homo sapiens]	P06748-2; P06748-3; P06748	2	4246.55	37	FALSE	0.01	-6.64			192813		92.17		6		55961	216200	12734.3	35904.6	217391	148412							120051	753134	34463.5	98197
FALSE		High	Unambiguous	LAALPENPPAIDWAYYK	[R].LAALPENPPAIDWAYYK.[A]			0.0565373	0.00272876	0.435	1	2	5	O75947-1	O75947-1 [42-58]			ATP synthase subunit d, mitochondrial [OS=Homo sapiens]	O75947-1; O75947-2	0	1931.99	17	FALSE
FALSE		High	Unambiguous	LAALTAGDRVPWAR	[R].LAALTAGDRVPWAR.[C]			0.0948604	0.0064943	0.34	1	2	2	P50416	P50416 [380-393]			Carnitine O-palmitoyltransferase 1, liver isoform [OS=Homo sapiens]	P50416-2; P50416	1	1496.83	14	FALSE
FALSE		High	Unambiguous	IADLPPANPDHIGGYR	[R].IADLPPANPDHIGGYR.[L]			0.0118483	0.0010893	0.713	1	2	41	O75746	O75746 [625-640]			Calcium-binding mitochondrial carrier protein Aralar1 [OS=Homo sapiens]	O75746-2; O75746	0	1705.87	16	FALSE	0.01	-6.64			604163		18.66		6		334744	185457	167653	163319	260072	291603							718110	646039	453730	446669
FALSE		High	Unambiguous	IAHIPLYFVNAQFPR	[R].IAHIPLYFVNAQFPR.[F]			4.00052e-06	0.0010893	2.122	1	2	25	Q9NRG9-1	Q9NRG9-1 [479-493]			Aladin [OS=Homo sapiens]	Q9NRG9-1; Q9NRG9-2	0	1785.98	15	FALSE	100	6.64				2.27697e+06		26.19		6							2.61585e+06	2.53959e+06	1.67459e+06	3.38505e+06	1.52454e+06	1.67217e+06
FALSE		High	Unambiguous	LALLHEGTGPR	[R].LALLHEGTGPR.[V]			0.122841	0.00860454	0.291	1	1	1	Q9UQE7	Q9UQE7 [62-72]			Structural maintenance of chromosomes protein 3 [OS=Homo sapiens]	Q9UQE7	0	1163.65	11	FALSE
FALSE		High	Unambiguous	LALVTGGEIASTFDHPELVK	[R].LALVTGGEIASTFDHPELVK.[L]			0.114777	0.00860454	0.304	1	2	1	P78371-1	P78371-1 [323-342]			T-complex protein 1 subunit beta [OS=Homo sapiens]	P78371-2; P78371-1	0	2097.12	20	FALSE
FALSE		High	Unambiguous	IAPLEEGTLPFNLAEAQR	[R].IAPLEEGTLPFNLAEAQR.[Q]			1.56363e-05	0.0010893	1.882	1	2	18	Q9UJS0	Q9UJS0 [293-310]			Calcium-binding mitochondrial carrier protein Aralar2 [OS=Homo sapiens]	Q9UJS0-2; Q9UJS0	0	1969.04	18	FALSE	0.903	-0.15	0.954164	0.972272	1.97624e+06	1.78531e+06	40.33	29.69	6	6	1.15351e+06	524180	338831	304682	972693	1.02505e+06	2.0334e+06	1.91405e+06	1.02359e+06	1.11827e+06	1.29203e+06	1.92836e+06	2.47456e+06	1.82598e+06	916998	833285
FALSE		High	Unambiguous	LAQAWFNTHR	[R].LAQAWFNTHR.[E]			0.00280123	0.0010893	0.968	1	2	12	Q96A33-1	Q96A33-1 [163-172]			Coiled-coil domain-containing protein 47 [OS=Homo sapiens]	Q96A33-2; Q96A33-1	0	1243.63	10	FALSE	0.65	-0.62	0.132292	0.309206	374530	243330	27.35	53.63	6	6	167149	96616.8	228527	201239	169593	170189	235138	237877	510536	513894	110830	183524	358577	336565	618474	550375
FALSE		High	Unambiguous	LAQHITYVHQHSR	[R].LAQHITYVHQHSR.[Q]			0.0146002	0.0010893	0.676	1	2	7	P33993-1	P33993-1 [533-545]			DNA replication licensing factor MCM7 [OS=Homo sapiens]	P33993-1; P33993-3	0	1589.83	13	FALSE	0.01	-6.64			106608		53.42		3				12282.2		50927.8	51091.5									33239.9
FALSE		High	Unambiguous	LAQLLSRPGWR	[R].LAQLLSRPGWR.[S]			0.0012386	0.0010893	1.112	1	1	7	Q96AX1	Q96AX1 [499-509]			Vacuolar protein sorting-associated protein 33A [OS=Homo sapiens]	Q96AX1	0	1296.75	11	FALSE	0.01	-6.64			138382		42.74		6		64723.3	39591.6	25796	16243.9	76198.8	73931.5							138848	137917	69813.3	44425.9
FALSE		High	Unambiguous	IAQPGDHVSVTGIFLPILR	[R].IAQPGDHVSVTGIFLPILR.[T]			0.000304922	0.0010893	1.359	1	3	4	P33993-1	P33993-1 [264-282]			DNA replication licensing factor MCM7 [OS=Homo sapiens]	P33993-2; P33993-1; P33993-3	0	2033.15	19	FALSE	100	6.64				4.8477e+06		12.3		6							5906329	5378970	4.20017e+06	4542681	3.80797e+06	4.27633e+06
FALSE		High	Unambiguous	LASYLDKVQALEEANNDLENK	[R].LASYLDKVQALEEANNDLENK.[I]			0.0442595	0.00272876	0.479	1	1	1	KRT9	KRT9 [164-184]			Keratin, type I cytoskeletal 9 OS=Homo sapiens GN=KRT9 PE=1 SV=3	KRT9	1	2377.19	21	TRUE
FALSE		High	Unambiguous	LAVGSGLRPDTWER	[R].LAVGSGLRPDTWER.[F]			0.00421092	0.0010893	0.896	1	2	15	Q5K4L6-1	Q5K4L6-1 [445-458]			Long-chain fatty acid transport protein 3 [OS=Homo sapiens]	Q5K4L6-2; Q5K4L6-1	0	1556.82	14	FALSE	0.01	-6.64			397211		12.71		6		200460	107264	140339	117647	202301	199086							430037	373653	379807	321757
FALSE		High	Unambiguous	LDAPVDYFYRPETQHR	[R].LDAPVDYFYRPETQHR.[E]			0.0494842	0.00272876	0.459	1	3	1	Q9Y5Q8-1	Q9Y5Q8-1 [176-191]			general transcription factor 3C polypeptide 5 [OS=Homo sapiens]	Q9Y5Q8-3; Q9Y5Q8-2; Q9Y5Q8-1	0	2006.97	16	FALSE
FALSE		High	Unambiguous	LDDHALTGASDSR	[R].LDDHALTGASDSR.[V]			5.43651e-06	0.0010893	2.068	1	1	11	Q12788	Q12788 [616-628]			Transducin beta-like protein 3 [OS=Homo sapiens]	Q12788	0	1357.63	13	FALSE	100	6.64				3.8476e+06		52.95		4							4.67729e+06	6.45792e+06			1.39616e+06	2.67033e+06
FALSE		High	Unambiguous	LDDQESPVYAAQQR	[R].LDDQESPVYAAQQR.[R]			1.67189e-07	0.0010893	2.681	1	1	26	Q96ST3	Q96ST3 [5-18]			Paired amphipathic helix protein Sin3a [OS=Homo sapiens]	Q96ST3	0	1619.77	14	FALSE	0.2	-2.32	7.90853e-05	0.00170297	3.31434e+06	661730	20.39	41.87	6	6	1.25709e+06	974836	1.38999e+06	1.46394e+06	974127	1.55027e+06	508643	664023	1.09243e+06	1.09512e+06	315674	539499	2.69679e+06	3.39584e+06	3.7618e+06	4.00379e+06
FALSE		High	Unambiguous	LDDSLGGTSEVIQRR	[R].LDDSLGGTSEVIQRR.[A]			0.0423226	0.00272876	0.487	1	2	4	O75182-1	O75182-1 [528-542]			paired amphipathic helix protein sin3b [OS=Homo sapiens]	O75182-2; O75182-1	1	1645.85	15	FALSE	100	6.64				108013		82.94		5							420616	463967	84809.3	108013	71163.5
FALSE		High	Unambiguous	LDHKFDLMYAK	[R].LDHKFDLMYAK.[R]			0.000151645	0.0010893	1.482	3	12	49	Q13748-1; P68363; Q9BQE3	Q13748-1 [391-401]; P68363 [391-401]; Q9BQE3 [391-401]			tubulin alpha-3C/D chain [OS=Homo sapiens] Tubulin alpha-1B chain [OS=Homo sapiens] Tubulin alpha-1C chain [OS=Homo sapiens]	Q13748-1; A6NHL2-1; Q71U36; A6NHL2-2; Q9NY65; P68366-2; P68363; Q71U36-2; Q9BQE3; P68363-2; Q9NY65-2; P68366	1	1380.7	11	FALSE	100	6.64				2.55323e+06		20.43		6							2.25214e+06	2142938	2.69609e+06	2857014	1.44244e+06	2.70985e+06
FALSE		High	Unambiguous	LDKAQIHDLVLVGGSTR	[K].LDKAQIHDLVLVGGSTR.[I]			1.50086e-07	0.0010893	2.7	1	2	227	P0DMV8	P0DMV8 [326-342]			heat shock 70 kDa protein 1A [OS=Homo sapiens]	P0DMV8-2; P0DMV8	1	1822.02	17	FALSE	1.085	0.12	0.955864	0.972272	5.04085e+06	5.47151e+06	60.91	61.44	6	6	2.6083e+06	1.30364e+06	425764	350945	3.03773e+06	2.82202e+06	6.23779e+06	6181339	913265	1.08976e+06	3.84014e+06	5792665	5.59545e+06	4.54123e+06	1.15227e+06	959813
FALSE		High	Unambiguous	LDKSQIHDIVLVGGSTR	[K].LDKSQIHDIVLVGGSTR.[I]			1.15319e-06	0.0010893	2.341	1	2	175	P11142-1	P11142-1 [326-342]			Heat shock cognate 71 kDa protein [OS=Homo sapiens]	P11142-1; P11142-2	1	1838.01	17	FALSE	2.52	1.33	0.202817	0.41462	5.83624e+06	1.47071e+07	69.43	60.28	6	6	3.28884e+06	1.38589e+06	342255	304767	3.93272e+06	3.63697e+06	1.5189e+07	1.37869e+07	3.19535e+06	1.50318e+06	1.2369e+07	12834971	7.0554e+06	4.82775e+06	926264	833518
FALSE		High	Unambiguous	LDLAGRDLTDYLMK	[R].LDLAGRDLTDYLMK.[I]			0.0136441	0.0010893	0.688	3	8	22	ACTB; Q562R1; P68032	ACTB [178-191]; Q562R1 [179-192]; P68032 [180-193]			Actin, cytoplasmic 1 OS=Bos taurus GN=ACTB PE=1 SV=1 Beta-actin-like protein 2 [OS=Homo sapiens] Actin, alpha cardiac muscle 1 [OS=Homo sapiens]	P63267-1; ACTB; P63267-2; P62736; P68133; Q562R1; P68032; P63261	1	1623.84	14	TRUE	0.01	-6.64			278259		55.87		6		133388	77676.4	34254	30729.9	177790	196091							286150	270586	92703.6	84044.5
FALSE		High	Unambiguous	IDILDSALLRPGR	[R].IDILDSALLRPGR.[I]			0.00206297	0.0010893	1.022	1	2	30	P62195-1	P62195-1 [298-310]			26S proteasome regulatory subunit 8 [OS=Homo sapiens]	P62195-2; P62195-1	0	1438.84	13	FALSE	0.787	-0.35	0.0874823	0.245711	740339	582625	41.17	31.52	6	6	340782	215224	525951	480807	289146	253047	792167	763235	322464	436162	475979	494178	731063	749732	1.42341e+06	1.31498e+06
FALSE		High	Unambiguous	LDMVPHLETDMMQGGVYGSGGER	[R].LDMVPHLETDMMQGGVYGSGGER.[Y]			0.0214253	0.00194901	0.608	1	1	2	Q9ULX6	Q9ULX6 [99-121]			A-kinase anchor protein 8-like [OS=Homo sapiens]	Q9ULX6	0	2479.11	23	FALSE	0.01	-6.64			181603		25.13		4				73871.5	83131.4	71515.9	59132.7									199923	227359
FALSE		High	Unambiguous	LDMYVLHPPSAGAER	[R].LDMYVLHPPSAGAER.[T]			0.00615157	0.0010893	0.829	1	2	4	Q66K74	Q66K74 [393-407]			Microtubule-associated protein 1S [OS=Homo sapiens]	Q66K74-2; Q66K74	0	1655.82	15	FALSE
FALSE		High	Unambiguous	LDNTLGGTSEVIHR	[R].LDNTLGGTSEVIHR.[K]			2.46305e-05	0.0010893	1.802	1	1	44	Q96ST3	Q96ST3 [653-666]			Paired amphipathic helix protein Sin3a [OS=Homo sapiens]	Q96ST3	0	1511.78	14	FALSE	0.7	-0.51	0.201145	0.413906	2.76237e+07	1.93358e+07	41.82	56.31	6	6	12564248	8.09293e+06	21056202	20672392	11075375	12971850	17325706	19158652	44899208	44884232	10496373	15965120	2.69535e+07	2.81917e+07	5.69856e+07	5.65377e+07
FALSE		High	Unambiguous	LDNTLGGTSEVIHRK	[R].LDNTLGGTSEVIHRK.[A]			0.10166	0.0064943	0.327	1	1	8	Q96ST3	Q96ST3 [653-667]			Paired amphipathic helix protein Sin3a [OS=Homo sapiens]	Q96ST3	1	1639.88	15	FALSE	1.126	0.17	0.380139	0.607846	578092	650958	11.94	144.22	4	6	309844		226377		236479	243669	768146	833849	387221	5804319	360913	465417	664694		612656
FALSE		High	Unambiguous	IDRWFLHR	[R].IDRWFLHR.[M]			0.0117815	0.0010893	0.714	1	1	8	P27708	P27708 [832-839]			CAD protein [OS=Homo sapiens]	P27708	1	1142.62	8	FALSE	0.01	-6.64			157993		23.59		5			61426.5	58962.4	54137.9	68494.4	52667.5								213979	159573	148064
FALSE		High	Unambiguous	LDSELKNMQDMVEDYR	[R].LDSELKNMQDMVEDYR.[N]			0.000400447	0.0010893	1.311	1	1	3	KRT1	KRT1 [252-267]			Keratin, type II cytoskeletal 1 OS=Homo sapiens GN=KRT1 PE=1 SV=6	KRT1	1	1985.89	16	TRUE
FALSE		High	Unambiguous	IDTRNELESYAYSLK	[R].IDTRNELESYAYSLK.[N]			1.59956e-05	0.0010893	1.878	1	1	53	P11021	P11021 [559-573]			78 kDa glucose-regulated protein [OS=Homo sapiens]	P11021	1	1801.9	15	FALSE	0.912	-0.13	0.879322	0.943591	4.78475e+06	4.36219e+06	68.47	52.43	6	5	2.372e+06	1371500	160582	147841	2.34996e+06	2296505	4592138	4277697		266033	3.09294e+06	3.72872e+06	5.08853e+06	4.77762e+06	434591	404336
FALSE		High	Unambiguous	LDYHISVQNMMR	[R].LDYHISVQNMMR.[R]			0.0020282	0.0010893	1.025	1	1	4	P24539	P24539 [197-208]			ATP synthase F(0) complex subunit B1, mitochondrial [OS=Homo sapiens]	P24539	0	1506.72	12	FALSE	0.01	-6.64			217054		25.31		4				100250	87511.2	85337.8	70251.5									271312	239338
FALSE		High	Unambiguous	LDYITAEIKR	[R].LDYITAEIKR.[Y]			0.0249468	0.00194901	0.581	1	1	6	O15212	O15212 [80-89]			Prefoldin subunit 6 [OS=Homo sapiens]	O15212	1	1221.68	10	FALSE	0.726	-0.46	0.138163	0.315007	1.16117e+06	842512	44.35	46.04	6	6	1.10781e+06	575587	335426	316008	510491	548757	1.4596e+06	1.39181e+06	766735	871744	346134	526103	2.37653e+06	2.00506e+06	907783	864262
FALSE		High	Unambiguous	LEAARPSAVLDLVHSAER	[R].LEAARPSAVLDLVHSAER.[L]			0.0199111	0.0010893	0.621	1	1	5	Q7Z7A3	Q7Z7A3 [255-272]			Cytoplasmic tRNA 2-thiolation protein 1 [OS=Homo sapiens]	Q7Z7A3	0	1934.05	18	FALSE	0.01	-6.64			221411		16.2		6		95781.5	74623.1	61107	71162.1	104745	114340							205475	259950	165377	194624
FALSE		High	Unambiguous	IEAIEGSREDIVVPVYLR	[R].IEAIEGSREDIVVPVYLR.[E]			2.62771e-06	0.0010893	2.196	1	1	42	P51784	P51784 [578-595]			Ubiquitin carboxyl-terminal hydrolase 11 [OS=Homo sapiens]	P51784	1	2058.12	18	FALSE	0.515	-0.96	0.459727	0.671909	1.59995e+06	823633	60.78	50.07	4	4	682216		75730.4		949259	838251	858847	978998			162320	666395	1.46352e+06		204953
FALSE		High	Unambiguous	IEDDNDNAPYFEHR	[K].IEDDNDNAPYFEHR.[V]			0.0224136	0.00194901	0.6	1	2	6	Q08554-1	Q08554-1 [232-245]			Desmocollin-1 [OS=Homo sapiens]	Q08554-2; Q08554-1	0	1734.74	14	FALSE	0.01	-6.64			165876		21.41		5		77322.3		79013.6	61503.2	54008.4	65360.6							165876		213839	168208
FALSE		High	Unambiguous	IEDVTPIPSDSTRR	[R].IEDVTPIPSDSTRR.[K]			0.0140347	0.0010893	0.683	1	1	2	P62263	P62263 [129-142]			40S ribosomal protein S14 [OS=Homo sapiens]	P62263	1	1585.82	14	FALSE	100	6.64				2.33458e+06		35.6		6							2.06612e+06	2.53497e+06	2.62328e+06	2.60367e+06	737787	1.29895e+06
FALSE		High	Unambiguous	LEEDRHSIDITSELWNDELQSR	[R].LEEDRHSIDITSELWNDELQSR.[K]			0.0094524	0.0010893	0.753	1	2	3	Q5PSV4	Q5PSV4 [168-189]			Breast cancer metastasis-suppressor 1-like protein [OS=Homo sapiens]	Q5PSV4-2; Q5PSV4	1	2685.28	22	FALSE
FALSE		High	Unambiguous	LEELDADKAEMR	[R].LEELDADKAEMR.[A]			0.0279222	0.00194901	0.561	1	2	8	Q9UG63	Q9UG63 [196-207]			ATP-binding cassette sub-family F member 2 [OS=Homo sapiens]	Q9UG63-2; Q9UG63	1	1419.68	12	FALSE	0.01	-6.64			350066		33.97		5		67380.5		127187	127998	172468	211992							144548		344213	350066
FALSE		High	Unambiguous	IEIESFYEGEDFSETLTR	[R].IEIESFYEGEDFSETLTR.[A]			9.13615e-07	0.0010893	2.382	1	1	33	P11021	P11021 [307-324]			78 kDa glucose-regulated protein [OS=Homo sapiens]	P11021	0	2164.99	18	FALSE
FALSE		High	Unambiguous	IEIVVVGTGDRTER	[R].IEIVVVGTGDRTER.[L]			0.0347766	0.00194901	0.522	1	2	7	Q9BU61-1	Q9BU61-1 [112-125]			NADH dehydrogenase [ubiquinone] 1 alpha subcomplex assembly factor 3 [OS=Homo sapiens]	Q9BU61-1; Q9BU61-2	1	1543.84	14	FALSE	0.01	-6.64			191186		2.79		2						84534	89837.4
FALSE		High	Unambiguous	LESAEGVLRPGAIR	[R].LESAEGVLRPGAIR.[D]			0.126729	0.00860454	0.285	1	1	4	Q07864	Q07864 [1295-1308]			DNA polymerase epsilon catalytic subunit A [OS=Homo sapiens]	Q07864	0	1467.83	14	FALSE	0.01	-6.64			100007		13.31		5		44729.6		47037.1	43785.7	42286.3	47928.2							95956.3		127299	119751
FALSE		High	Unambiguous	LETADAPARLEYYENAR	[K].LETADAPARLEYYENAR.[K]			0.0148495	0.0010893	0.673	1	1	8	O14654	O14654 [100-116]			insulin receptor substrate 4 [OS=Homo sapiens]	O14654	1	1981.96	17	FALSE	0.01	-6.64			316439		48.11		6		214206	122607	44982.9	49963.9	148362	140228							459527	427101	121740	136648
FALSE		High	Unambiguous	LETHMTPEMFR	[R].LETHMTPEMFR.[T]			0.000710401	0.0010893	1.21	1	1	4	Q08211	Q08211 [785-795]			Atp-dependent rna helicase a [OS=Homo sapiens]	Q08211	0	1391.64	11	FALSE	0.01	-6.64			1.13537e+06		68.27		6		103348	54941.6	673336	645145	501307	534252							221708	191389	1.82229e+06	1.76443e+06
FALSE		High	Unambiguous	IETLDPALIRPGR	[R].IETLDPALIRPGR.[I]			0.038047	0.00194901	0.506	1	2	7	P62191	P62191 [334-346]			26S proteasome regulatory subunit 4 [OS=Homo sapiens]	P62191-2; P62191	0	1450.84	13	FALSE	100	6.64				1.44961e+06		10.18		2									1.27006e+06	1.55797e+06
FALSE		High	Unambiguous	IEWLESHQDADIEDFK	[K].IEWLESHQDADIEDFK.[A]			8.46693e-06	0.0010893	1.99	1	1	31	P11021	P11021 [602-617]			78 kDa glucose-regulated protein [OS=Homo sapiens]	P11021	0	1974.91	16	FALSE	0.01	-6.64			2.1384e+06		62.47		6		764842	374669	2.00605e+06	1944116	804911	1.18033e+06							1.64078e+06	1.30516e+06	5.42909e+06	5.31704e+06
FALSE		High	Unambiguous	LFDFQGLQHQVAHVATQLEAAR	[R].LFDFQGLQHQVAHVATQLEAAR.[L]			0.112984	0.00806133	0.307	1	2	1	P45954	P45954 [326-347]			Short/branched chain specific acyl-CoA dehydrogenase, mitochondrial [OS=Homo sapiens]	P45954; P45954-2	0	2479.28	22	FALSE
FALSE		High	Unambiguous	LFDRGDFYTAHGEDALLAAR	[R].LFDRGDFYTAHGEDALLAAR.[E]			0.0614212	0.00359603	0.42	1	1	2	P43246-1	P43246-1 [36-55]			DNA mismatch repair protein MSH2 [OS=Homo sapiens]	P43246-1	1	2238.09	20	FALSE
FALSE		High	Unambiguous	LFGGNFAHQASVAR	[R].LFGGNFAHQASVAR.[V]			0.0395708	0.00272876	0.499	1	2	4	O14773	O14773 [246-259]			Tripeptidyl-peptidase 1 [OS=Homo sapiens]	O14773; O14773-2	0	1474.75	14	FALSE	0.01	-6.64			414816		15.57		6		225953	110112	147789	109747	186509	213843							484726	383577	399970	300151
FALSE		High	Unambiguous	IFHTVTTTDDPVIR	[R].IFHTVTTTDDPVIR.[K]			8.56366e-06	0.0010893	1.988	1	3	22	O15371	O15371 [223-236]			Eukaryotic translation initiation factor 3 subunit D [OS=Homo sapiens]	O15371-3; O15371; O15371-2	0	1614.85	14	FALSE	0.01	-6.64			535116		16.71		6		269316	142279	232810	227202	186500	211445							577751	495628	630067	621385
FALSE		High	Unambiguous	IFSLSGTLETVR	[R].IFSLSGTLETVR.[G]			0.00136393	0.0010893	1.095	1	1	4	Q9Y2S7	Q9Y2S7 [286-297]			Polymerase delta-interacting protein 2 [OS=Homo sapiens]	Q9Y2S7	0	1322.73	12	FALSE	0.01	-6.64			288925		43.8		5		239703	47471.5	88081.4	105642		211057							514224	165367	238380	288925
FALSE		High	Unambiguous	IGEEQSAEDAEDGPPELLFIHGGHTAK	[K].IGEEQSAEDAEDGPPELLFIHGGHTAK.[I]			1.5905e-05	0.0010893	1.879	1	2	7	Q16576-1	Q16576-1 [349-375]			Histone-binding protein RBBP7 [OS=Homo sapiens]	Q16576-1; Q16576-2	0	2847.34	27	FALSE	4.199	2.07	0.0082445	0.057616	262737	1.10335e+06	55.23	2.66	5	2	93905.2	75423.3	223765	222155		103752			1.05867e+06	1.0828e+06			201450	262737	605587	607581
FALSE		High	Unambiguous	LGEHNIDVLEGNEQFINAAK	[R].LGEHNIDVLEGNEQFINAAK.[I]			3.86648e-06	0.0010893	2.128	1	1	19	P00761	P00761 [58-77]			Trypsin OS=Sus scrofa PE=1 SV=1	P00761	0	2211.1	20	TRUE	0.01	-6.64			1.01745e+06		27.79		6		351637	294190	230496	369350	577576	611352							754351	1.02481e+06	623804	1.01015e+06
FALSE		High	Unambiguous	LGGEAHSMVWDPSGER	[R].LGGEAHSMVWDPSGER.[L]			0.00127422	0.0010893	1.107	1	2	8	Q9NRG9-1	Q9NRG9-1 [395-410]			Aladin [OS=Homo sapiens]	Q9NRG9-1; Q9NRG9-2	0	1727.78	16	FALSE	0.01	-6.64			248376		38.59		6		74513.3	32109.3	127074	123730	104880	122209							159850	111853	343909	338394
FALSE		High	Unambiguous	IGLGGRGGSGGSYGR	[K].IGLGGRGGSGGSYGR.[G]			0.0708428	0.00434873	0.394	1	1	8	KRT9	KRT9 [473-487]			Keratin, type I cytoskeletal 9 OS=Homo sapiens GN=KRT9 PE=1 SV=3	KRT9	1	1350.69	15	TRUE	0.01	-6.64			131879		40.16		6		59625	59463.6	56099	49716.1	27208.4	39563.3							127911	207141	151824	135970
FALSE		High	Unambiguous	LGIHEDSQNR	[K].LGIHEDSQNR.[K]			0.00304958	0.0010893	0.953	1	2	5	P07900	P07900 [447-456]			Heat shock protein HSP 90-alpha [OS=Homo sapiens]	P07900-2; P07900	0	1168.57	10	FALSE	0.01	-6.64			347709		100.68		4				492886	457145	35448.4	46343.8									1.33393e+06	1.25026e+06
FALSE		High	Unambiguous	LHDVEHVLIDVGTGYYVEK	[K].LHDVEHVLIDVGTGYYVEK.[T]			0.000474794	0.0010893	1.281	1	2	11	Q99471-1	Q99471-1 [76-94]			prefoldin subunit 5 [OS=Homo sapiens]	Q99471-1; Q99471-3	0	2186.11	19	FALSE
FALSE		High	Unambiguous	LHFFMPGFAPLTAR	[R].LHFFMPGFAPLTAR.[G]			0.00400181	0.0010893	0.905	1	2	1	Q13509	Q13509 [263-276]			tubulin beta-3 chain [OS=Homo sapiens]	Q13509; Q13509-2	0	1604.84	14	FALSE
FALSE		High	Unambiguous	LHFFMPGFAPLTSR	[R].LHFFMPGFAPLTSR.[G]			2.957e-08	0.0010893	2.986	5	8	222	P04350; Q9BUF5; Q3ZCM7; P07437; Q9BVA1	P04350 [263-276]; Q9BUF5 [263-276]; Q3ZCM7 [263-276]; P07437 [263-276]; Q9BVA1 [263-276]			Tubulin beta-4A chain [OS=Homo sapiens] Tubulin beta-6 chain [OS=Homo sapiens] tubulin beta-8 chain [OS=Homo sapiens] tubulin beta chain [OS=Homo sapiens] Tubulin beta-2B chain [OS=Homo sapiens]	Q13885; P04350; A6NNZ2; Q9BUF5; Q3ZCM7; P07437; P68371; Q9BVA1	0	1620.84	14	FALSE	1.658	0.73	0.010912	0.0696255	1.24695e+08	2.06694e+08	23.83	30.4	6	6	4.76749e+07	2.64542e+07	5.28827e+07	5.12435e+07	4.8098e+07	8.25636e+07	2.49307e+08	1.61884e+08	1.36622e+08	1.53674e+08	2.19356e+08	2.49255e+08	1.02275e+08	9.21533e+07	1.43119e+08	1.40148e+08
FALSE		High	Unambiguous	LHFLMTGYTPLTTDQSVASVR	[R].LHFLMTGYTPLTTDQSVASVR.[K]			0.000809429	0.0010893	1.187	1	2	13	P23258	P23258 [266-286]			tubulin gamma-1 chain [OS=Homo sapiens]	P23258; Q9NRH3	0	2337.19	21	FALSE
FALSE		High	Unambiguous	IHFPLATYAPVISAEK	[R].IHFPLATYAPVISAEK.[A]			4.33162e-06	0.0010893	2.108	3	10	46	Q13748-1; P68363; Q9BQE3	Q13748-1 [265-280]; P68363 [265-280]; Q9BQE3 [265-280]			tubulin alpha-3C/D chain [OS=Homo sapiens] Tubulin alpha-1B chain [OS=Homo sapiens] Tubulin alpha-1C chain [OS=Homo sapiens]	Q13748-1; Q6PEY2; Q13748-2; Q71U36; P68366-2; P68363; Q71U36-2; Q9BQE3; P68363-2; P68366	0	1756.96	16	FALSE	100	6.64				1.79778e+07		39.38		6							23592733	2.20927e+07	1.2867e+07	7.61908e+06	19893228	1.19684e+07
FALSE		High	Unambiguous	LHLGIPEAVFVEDVDSFMK	[R].LHLGIPEAVFVEDVDSFMK.[Q]			6.5347e-07	0.0010893	2.441	1	1	52	P61758	P61758 [21-39]			Prefoldin subunit 3 [OS=Homo sapiens]	P61758	0	2146.09	19	FALSE	0.01	-6.64			1.10708e+06		50.93		6		344944	161624	772513	741634	536944	474246							739991	563018	2.0907e+06	2.02832e+06
FALSE		High	Unambiguous	LHLSGIDANPNALFPPVEFPAPR	[R].LHLSGIDANPNALFPPVEFPAPR.[G]			0.0395708	0.00272876	0.499	1	1	1	P49327	P49327 [803-825]			Fatty acid synthase [OS=Homo sapiens]	P49327	0	2472.3	23	FALSE
FALSE		High	Unambiguous	LHISPSNMTNQNTNEYLEK	[K].LHISPSNMTNQNTNEYLEK.[I]			0.0229246	0.00194901	0.596	1	1	1	Q13547	Q13547 [343-361]			histone deacetylase 1 [OS=Homo sapiens]	Q13547	0	2233.06	19	FALSE
FALSE		High	Unambiguous	LHVQWAPTAAGPGGGAER	[R].LHVQWAPTAAGPGGGAER.[G]			8.2115e-05	0.0010893	1.59	1	2	14	Q2T9J0	Q2T9J0 [83-100]			Peroxisomal leader peptide-processing protease [OS=Homo sapiens]	Q2T9J0-2; Q2T9J0	0	1774.9	18	FALSE	0.01	-6.64			168824		27.91		6		82146.9	46428.2	37862.3	36135.1	85910.9	89097.3							176226	161733	102469	98827.3
FALSE		High	Unambiguous	LKEGLVEGEDYVLLPAAAWHYLVSWYGLEHGQPPIER	[R].LKEGLVEGEDYVLLPAAAWHYLVSWYGLEHGQPPIER.[K]			0.0225403	0.00194901	0.599	1	1	1	P51784	P51784 [145-181]			Ubiquitin carboxyl-terminal hydrolase 11 [OS=Homo sapiens]	P51784	1	4235.16	37	FALSE	100	6.64				2.7869e+06				1							2.75072e+06
FALSE		High	Unambiguous	LKEPMDVDVEDYYPAFLDMVR	[R].LKEPMDVDVEDYYPAFLDMVR.[S]			7.42102e-08	0.0010893	2.824	1	1	62	Q96ST3	Q96ST3 [947-967]			Paired amphipathic helix protein Sin3a [OS=Homo sapiens]	Q96ST3	1	2545.2	21	FALSE	0.01	-6.64			3.40001e+07		51.44		6		5.22629e+06	2.94968e+06	1.25931e+07	1.24021e+07	2.02485e+07	1.85027e+07							1.12117e+07	1.02752e+07	3.40815e+07	3.39189e+07
FALSE		High	Unambiguous	IKFEMEQNLR	[R].IKFEMEQNLR.[Q]			0.000120142	0.0010893	1.523	1	1	86	KRT9	KRT9 [241-250]			Keratin, type I cytoskeletal 9 OS=Homo sapiens GN=KRT9 PE=1 SV=3	KRT9	1	1307.68	10	TRUE	100	6.64				1.29222e+06		23.35		5							1.28671e+06	1236781		808332	877768	1.33828e+06
FALSE		High	Unambiguous	LKVEDALSYLDQVK	[R].LKVEDALSYLDQVK.[L]			4.81447e-05	0.0010893	1.684	1	1	89	Q96ST3	Q96ST3 [121-134]			Paired amphipathic helix protein Sin3a [OS=Homo sapiens]	Q96ST3	1	1620.88	14	FALSE	0.598	-0.74	0.0368167	0.154439	7.55647e+06	4.51574e+06	45.66	41.3	6	6	5657714	1.63813e+06	1.7232e+06	1.46243e+06	5.08058e+06	4.79549e+06	5.71263e+06	5195146	1.8462e+06	2.01597e+06	3.78504e+06	3.73319e+06	1.21372e+07	5.70644e+06	4.6636e+06	3.99967e+06
FALSE		High	Unambiguous	LKYENEVALR	[R].LKYENEVALR.[Q]			0.000431117	0.0010893	1.298	1	1	61	KRT10	KRT10 [236-245]			Keratin, type I cytoskeletal 10 OS=Homo sapiens GN=KRT10 PE=1 SV=6	KRT10	1	1234.68	10	TRUE	100	6.64				8.3927e+06		27.86		6							7.78653e+06	8545585	9794915	9714905	3.65926e+06	5391847
FALSE		High	Unambiguous	IIAHAQLLEQHR	[R].IIAHAQLLEQHR.[G]			0.0903978	0.00584769	0.349	1	1	4	P27708	P27708 [843-854]			CAD protein [OS=Homo sapiens]	P27708	0	1428.81	12	FALSE	100	6.64				392489		4.06		2									380352	381375
FALSE		High	Unambiguous	ILAHNNFVGR	[K].ILAHNNFVGR.[L]			0.0237131	0.00194901	0.59	1	3	3	O00425	O00425 [281-290]			Insulin-like growth factor 2 mRNA-binding protein 3 [OS=Homo sapiens]	Q9NZI8; Q9NZI8-2; O00425	0	1140.63	10	FALSE	0.029	-5.12	0.0428537	0.170886	687966	19768.1	12.88	126.5	2	5	292708	216374					413439	493110	16205.9		16025.2	11259.3	627931	753740
FALSE		High	Unambiguous	LLDVDNRVVLPIEAPIR	[R].LLDVDNRVVLPIEAPIR.[M]			0.0121189	0.0010893	0.709	1	1	2	P00403	P00403 [135-151]			Cytochrome c oxidase subunit 2 [OS=Homo sapiens]	P00403	1	1932.13	17	FALSE
FALSE		High	Unambiguous	LLEGEDAHLSSSQFSSGSQSSR	[R].LLEGEDAHLSSSQFSSGSQSSR.[D]			3.73693e-06	0.0010893	2.134	1	2	24	KRT14	KRT14 [418-439]			Keratin, type I cytoskeletal 14 OS=Homo sapiens GN=KRT14 PE=1 SV=4	KRT14; Q61782	0	2309.06	22	TRUE	0.524	-0.93	0.141292	0.316926	428809	224844	35.04	57.94	6	6	99664.3	65815.1	162364	153005	217208	255634	185284	179038	92918	269310	245610	462544	213805	229267	439416	418458
FALSE		High	Unambiguous	LLEGEDAHLTQYK	[R].LLEGEDAHLTQYK.[K]			0.0478574	0.00272876	0.465	1	1	2	KRT17	KRT17 [387-399]			Keratin, type I cytoskeletal 17 OS=Homo sapiens GN=KRT17 PE=1 SV=2	KRT17	0	1516.76	13	TRUE	0.01	-6.64			132614		62.26		5			5289.69	44923.9	48488.7	106870	114594								18426.6	121580	132614
FALSE		High	Unambiguous	LLESLDQLELRVEALR	[R].LLESLDQLELRVEALR.[E]			7.58382e-05	0.0010893	1.604	1	1	29	O95816	O95816 [28-43]			BAG family molecular chaperone regulator 2 [OS=Homo sapiens]	O95816	1	1897.08	16	FALSE	0.38	-1.4	0.108818	0.276758	7.53795e+06	2.86602e+06	59.8	34.38	6	4	5.07852e+06	3411959	1.11906e+06	479243	2.99414e+06	3.94285e+06	3.24137e+06	3.69775e+06			1322292	2.13801e+06	1.08947e+07	1.18856e+07	3.02857e+06	1.3107e+06
FALSE		High	Unambiguous	LLETHIHNQGLAAIEK	[K].LLETHIHNQGLAAIEK.[C]			0.0752227	0.00434873	0.383	1	1	1	Q13616	Q13616 [339-354]			Cullin-1 [OS=Homo sapiens]	Q13616	0	1786.98	16	FALSE	100	6.64				358603		5.86		2									323950	373794
FALSE		High	Unambiguous	LLETLFVHR	[R].LLETLFVHR.[F]			0.00135622	0.0010893	1.096	1	1	14	Q9NZ01-1	Q9NZ01-1 [142-150]			Very-long-chain enoyl-CoA reductase [OS=Homo sapiens]	Q9NZ01-1	0	1127.66	9	FALSE	1.113	0.15	0.412924	0.632107	374934	417134	42.24	52.73	6	6	157636	74675.8	250340	265713	160779	181659	377468	368899	706057	1.13761e+06	315433	382241	338170	260133	677508	726709
FALSE		High	Unambiguous	IIETLTQQLQAK	[K].IIETLTQQLQAK.[G]			0.00117031	0.0010893	1.122	1	1	2	Q9UHV9	Q9UHV9 [100-111]			Prefoldin subunit 2 [OS=Homo sapiens]	Q9UHV9	0	1385.8	12	FALSE
FALSE		High	Unambiguous	IIEVVDAIMTTAQSHQR	[R].IIEVVDAIMTTAQSHQR.[T]			0.0943548	0.00584769	0.341	1	2	1	Q01813	Q01813 [194-210]			ATP-dependent 6-phosphofructokinase, platelet type [OS=Homo sapiens]	Q01813; Q01813-2	0	1912	17	FALSE
FALSE		High	Unambiguous	IIFDDFREAYYWLR	[R].IIFDDFREAYYWLR.[H]			6.96445e-05	0.0010893	1.619	1	2	24	P46977	P46977 [500-513]			Dolichyl-diphosphooligosaccharide--protein glycosyltransferase subunit STT3A [OS=Homo sapiens]	P46977; P46977-2	1	1906.95	14	FALSE	0.968	-0.05	0.227594	0.445533	1.4816e+06	1.43356e+06	57.66	13.7	6	3	679603	481740	122620	93680.8	664148	721590	1.41495e+06	1.59345e+06				1.08383e+06	1.45792e+06	1.67814e+06	331853	256211
FALSE		High	Unambiguous	ILFRPVASQLPR	[R].ILFRPVASQLPR.[I]			0.00103303	0.0010893	1.144	1	2	10	P35232	P35232 [94-105]			Prohibitin [OS=Homo sapiens]	P35232; P35232-2	0	1396.84	12	FALSE	100	6.64				1.47302e+06		21.39		6							1.47393e+06	1.39067e+06	1.05958e+06	1.16347e+06	1.27737e+06	1.69848e+06
FALSE		High	Unambiguous	IIFSPVAPKEEHVR	[R].IIFSPVAPKEEHVR.[R]			0.0391295	0.00194901	0.501	1	4	7	O15294	O15294 [900-913]			UDP-N-acetylglucosamine--peptide N-acetylglucosaminyltransferase 110 kDa subunit [OS=Homo sapiens]	O15294-4; O15294; O15294-2; O15294-3	1	1621.91	14	FALSE	0.908	-0.14	0.298068	0.512107	473378	429909	61.11	70.65	6	6	234173	128052	71439.9	67892.1	411250	391807	402249	463006	28440.4	68829.8	367639	557405	502359	446068	193342	185681
FALSE		High	Unambiguous	ILGADTSVDLEETGR	[R].ILGADTSVDLEETGR.[V]			0.000441019	0.0010893	1.294	1	3	8	P25705-1	P25705-1 [59-73]			ATP synthase subunit alpha, mitochondrial [OS=Homo sapiens]	P25705-2; P25705-1; P25705-3	0	1575.79	15	FALSE
FALSE		High	Unambiguous	LLGQFTLIGIPPAPR	[K].LLGQFTLIGIPPAPR.[G]			1.15061e-05	0.0010893	1.936	1	1	16	P38646	P38646 [499-513]			Stress-70 protein, mitochondrial [OS=Homo sapiens]	P38646	0	1592.95	15	FALSE	100	6.64				6.84818e+06		47.73		6							5479282	5.26769e+06	13131245	14675579	5212511	6.23441e+06
FALSE		High	Unambiguous	LIGQIVSSITASLR	[R].LIGQIVSSITASLR.[F]			3.57891e-07	0.0010893	2.547	1	5	78	Q13748-1	Q13748-1 [230-243]			tubulin alpha-3C/D chain [OS=Homo sapiens]	Q13748-1; Q6PEY2; Q13748-2; Q71U36; Q71U36-2	0	1457.87	14	FALSE	0.471	-1.09	0.00232718	0.0221082	6.30343e+06	2.96763e+06	22.64	31.91	6	6	3.58001e+06	1.78854e+06	1.7141e+06	1.71485e+06	2.76475e+06	3.82149e+06	2.81156e+06	3.76298e+06	2.79406e+06	5.32133e+06	1.86838e+06	2.537e+06	7.68002e+06	6.23037e+06	4.63897e+06	4.69e+06
FALSE		High	Unambiguous	LLHDQVGVIQFGPYK	[R].LLHDQVGVIQFGPYK.[Q]			0.0143551	0.0010893	0.679	1	2	3	P53621-1	P53621-1 [942-956]			coatomer subunit alpha [OS=Homo sapiens]	P53621-2; P53621-1	0	1713.93	15	FALSE	0.01	-6.64			91308.3		18.23		6		40641.1	25542.2	41188.1	39228.9	40622	30850.5							87185.5	88976.4	111470	107289
FALSE		High	Unambiguous	LLHGFNAEGIHFS	[R].LLHGFNAEGIHFS.[-]			6.61738e-05	0.0010893	1.628	1	1	47	Q9UNQ2	Q9UNQ2 [301-313]			Probable dimethyladenosine transferase [OS=Homo sapiens]	Q9UNQ2	0	1441.72	13	FALSE	2.528	1.34	0.0664801	0.212605	3.80797e+06	9.62574e+06	30.97	48.59	6	6	2.61947e+06	1.33125e+06	970612	916966	1.63477e+06	1842919	10427191	1.03926e+07	2.6888e+06	3.26643e+06	7.10992e+06	9.48045e+06	5.61943e+06	4.63739e+06	2.62682e+06	2.50785e+06
FALSE		High	Unambiguous	LLKEYQELMNVK	[R].LLKEYQELMNVK.[L]			0.071621	0.00434873	0.392	1	4	6	KRT6B	KRT6B [444-455]			Keratin, type II cytoskeletal 6B OS=Homo sapiens GN=KRT6B PE=1 SV=5	KRT6B; KRT6A; Krt6a; KRT6C	1	1507.82	12	TRUE	3.569	1.84	0.062644	0.204384	149564	533776	89.73	6.75	6	2	78103.3	38325.5	47371.1	42083.1	314638	315375					412512	478601	167551	133507	128203	115095
FALSE		High	Unambiguous	ILLANRNEVFHR	[R].ILLANRNEVFHR.[E]			0.00400181	0.0010893	0.905	1	2	14	Q92947-1	Q92947-1 [83-94]			Glutaryl-CoA dehydrogenase, mitochondrial [OS=Homo sapiens]	Q92947-1; Q92947-2	1	1481.83	12	FALSE	0.814	-0.3	0.7987	0.890107	632335	514704	70.66	65.99	6	6	316536	169035	32631.6	21820.7	418656	341077	595199	617995	63862.6	73163.4	364892	503087	679050	588834	88312.8	59678.2
FALSE		High	Unambiguous	LLLIQAFRPDR	[R].LLLIQAFRPDR.[L]			0.0481249	0.00272876	0.464	1	1	1	Q14204	Q14204 [3990-4000]			Cytoplasmic dynein 1 heavy chain 1 [OS=Homo sapiens]	Q14204	0	1341.8	11	FALSE
FALSE		High	Unambiguous	LLLQVQHASK	[K].LLLQVQHASK.[Q]			0.0667021	0.00359603	0.405	1	3	1	P05141	P05141 [34-43]			ADP/ATP translocase 2 [OS=Homo sapiens]	P12236; P05141; P12235	0	1136.68	10	FALSE	0.01	-6.64			1.49186e+06				1		695426												1.49186e+06
FALSE		High	Unambiguous	ILNEMRDQYEK	[R].ILNEMRDQYEK.[M]			0.0222876	0.00194901	0.601	2	3	1	KRT14; KRT17	KRT14 [283-293]; KRT17 [252-262]			Keratin, type I cytoskeletal 14 OS=Homo sapiens GN=KRT14 PE=1 SV=4 Keratin, type I cytoskeletal 17 OS=Homo sapiens GN=KRT17 PE=1 SV=2	KRT14; Krt42; KRT17	1	1438.7	11	TRUE
FALSE		High	Unambiguous	ILNEMRDQYEQMAEK	[R].ILNEMRDQYEQMAEK.[N]			0.00019692	0.0010893	1.436	1	3	5	KRT16	KRT16 [285-299]			Keratin, type I cytoskeletal 16 OS=Homo sapiens GN=KRT16 PE=1 SV=4	Krt16; Krt16; KRT16	1	1897.88	15	TRUE	0.01	-6.64			39551.9		125.58		6		18832.3	11115.7	9949.74	10393.9	202788	221038							40400	38721.7	26927.5	28426.6
FALSE		High	Unambiguous	IINEPTAAAIAYGLDK	[R].IINEPTAAAIAYGLDK.[KRG]			1.11704e-07	0.0010893	2.752	4	5	13	P54652; P11142-1; P11021; P34931	P54652 [173-188]; P11142-1 [172-187]; P11021 [198-213]; P34931 [174-189]			Heat shock-related 70 kDa protein 2 [OS=Homo sapiens] Heat shock cognate 71 kDa protein [OS=Homo sapiens] 78 kDa glucose-regulated protein [OS=Homo sapiens] Heat shock 70 kDa protein 1-like [OS=Homo sapiens]	P54652; P11142-1; P11021; P11142-2; P34931	0	1659.9	16	FALSE	100	6.64				1.72195e+07		26.38		6							14564793	14501211	25679788	23087588	15094490	13611784
FALSE		High	Unambiguous	IINEPTAAAIAYGLDKK	[R].IINEPTAAAIAYGLDKK.[GV]			0.0146828	0.0010893	0.675	2	3	16	P54652; P11142-1	P54652 [173-189]; P11142-1 [172-188]			Heat shock-related 70 kDa protein 2 [OS=Homo sapiens] Heat shock cognate 71 kDa protein [OS=Homo sapiens]	P54652; P11142-1; P11142-2	1	1787.99	17	FALSE	100	6.64				4.69189e+07		38.59		6							45666468	45538784	36508036	42995624	78064896	49798924
FALSE		High	Unambiguous	IINEPTAAAIAYGLDKR	[R].IINEPTAAAIAYGLDKR.[E]			0.0367867	0.00194901	0.512	1	1	9	P11021	P11021 [198-214]			78 kDa glucose-regulated protein [OS=Homo sapiens]	P11021	1	1816	17	FALSE	100	6.64				2.90324e+07		13.85		6							21852256	23568406	26543306	29943518	24239848	27900338
FALSE		High	Unambiguous	IINEPTAAAIAYGLDR	[R].IINEPTAAAIAYGLDR.[RT]			1.8879e-08	0.0010893	3.065	2	3	213	P17066; P0DMV8	P17066 [174-189]; P0DMV8 [172-187]			Heat shock 70 kDa protein 6 [OS=Homo sapiens] heat shock 70 kDa protein 1A [OS=Homo sapiens]	P17066; P0DMV8-2; P0DMV8	0	1687.9	16	FALSE	3.36	1.75	2.23917e-06	0.000235674	8.51843e+07	2.86259e+08	23.87	22.24	6	6	4.5019e+07	2.00844e+07	2.77626e+07	2.58882e+07	5.25301e+07	5.1631e+07	4.3633e+08	2.51957e+08	273473664	2.5762e+08	266224849	2.41179e+08	9.65771e+07	6.99642e+07	7.51355e+07	7.08025e+07
FALSE		High	Unambiguous	LIPHTVLTFVFLEQLR	[R].LIPHTVLTFVFLEQLR.[K]			0.0748143	0.00434873	0.384	1	2	1	Q9UBX3	Q9UBX3 [263-278]			Mitochondrial dicarboxylate carrier [OS=Homo sapiens]	Q9UBX3-2; Q9UBX3	0	1926.12	16	FALSE	0.01	-6.64			232100		37.62		5		72638.6	66628.4	105962	122340		62802.8							155828	232100	286772	334591
FALSE		High	Unambiguous	LLPPPPIMSAR	[K].LLPPPPIMSAR.[V]			0.0139557	0.0010893	0.684	1	1	2	Q8TEE9	Q8TEE9 [112-122]			Histone deacetylase complex subunit SAP25 [OS=Homo sapiens]	Q8TEE9	0	1191.69	11	FALSE	100	6.64				554536		54.1		6							542627	535354	280275	239374	721460	912061
FALSE		High	Unambiguous	LLRDYQELMNTK	[R].LLRDYQELMNTK.[L]			2.34031e-05	0.0010893	1.811	1	2	75	KRT1	KRT1 [461-472]			Keratin, type II cytoskeletal 1 OS=Homo sapiens GN=KRT1 PE=1 SV=6	Krt2; KRT1	1	1523.79	12	TRUE	1.1	0.14	0.786165	0.881705	4.90488e+06	5.39425e+06	60.88	58.87	6	6	2.55041e+06	1.26227e+06	475003	449679	3.30922e+06	3.24232e+06	5.45042e+06	5043301	1.37933e+06	1.64169e+06	7.14764e+06	5851148	5.47128e+06	4.39711e+06	1.28553e+06	1.22984e+06
FALSE		High	Unambiguous	LLRDYQELMNVK	[R].LLRDYQELMNVK.[L]			0.00351329	0.0010893	0.928	1	4	1	KRT2	KRT2 [459-470]			Keratin, type II cytoskeletal 2 epidermal OS=Homo sapiens GN=KRT2 PE=1 SV=2	KRT79; KRT2; KRT76; KRT3	1	1521.81	12	TRUE
FALSE		High	Unambiguous	LISQIVSSITASLR	[R].LISQIVSSITASLR.[F]			2.29007e-08	0.0010893	3.031	2	8	126	P68363; Q9BQE3	P68363 [230-243]; Q9BQE3 [230-243]			Tubulin alpha-1B chain [OS=Homo sapiens] Tubulin alpha-1C chain [OS=Homo sapiens]	Q9NY65; P68366-2; P68363; Q9BQE3; P68363-2; Q9H853; Q9NY65-2; P68366	0	1487.88	14	FALSE	0.465	-1.1	4.51365e-05	0.00132537	8.94534e+07	4.1602e+07	13.81	19.83	6	6	4.56653e+07	2.72396e+07	2.55676e+07	2.66894e+07	3.83094e+07	4.33975e+07	4.58407e+07	4.52892e+07	2.61419e+07	4.47329e+07	2.71754e+07	3.30716e+07	9.79636e+07	9.48892e+07	6.9195e+07	7.29938e+07
FALSE		High	Unambiguous	LLSSVTAELPEDKPR	[R].LLSSVTAELPEDKPR.[L]			0.0183997	0.0010893	0.635	1	4	8	Q9H974-1	Q9H974-1 [235-249]			Queuine tRNA-ribosyltransferase accessory subunit 2 [OS=Homo sapiens]	Q9H974-3; Q9H974-1; Q9H974-4; Q9H974-2	0	1654.9	15	FALSE	0.01	-6.64			409713		10.16		6		190707	128247	131568	126454	187305	196641							409115	446747	356069	345844
FALSE		High	Unambiguous	ILTDYGFEGHPFR	[R].ILTDYGFEGHPFR.[K]			0.0106428	0.0010893	0.732	1	1	11	O75489	O75489 [187-199]			NADH dehydrogenase [ubiquinone] iron-sulfur protein 3, mitochondrial [OS=Homo sapiens]	O75489	0	1551.76	13	FALSE
FALSE		High	Unambiguous	LLTETEDWLYEEGEDQAK	[R].LLTETEDWLYEEGEDQAK.[Q]			3.50277e-05	0.0010893	1.74	1	4	20	Q92598	Q92598 [668-685]			Heat shock protein 105 kDa [OS=Homo sapiens]	Q92598-3; Q92598-2; Q92598-4; Q92598	0	2168.99	18	FALSE
FALSE		High	Unambiguous	IITHPNFNGNTLDNDIMLIK	[K].IITHPNFNGNTLDNDIMLIK.[L]			2.73429e-06	0.0010893	2.189	1	1	63	P00761	P00761 [78-97]			Trypsin OS=Sus scrofa PE=1 SV=1	P00761	0	2283.18	20	TRUE	0.496	-1.01	0.133064	0.309206	1.79024e+07	8.88696e+06	60.89	58.13	6	6	8971963	4.78014e+06	2.37757e+06	2.3842e+06	1.32668e+07	1.58687e+07	7635685	9771037	2916211	5.03636e+06	14894354	10649552	1.92471e+07	1.66516e+07	6.43454e+06	6.52064e+06
FALSE		High	Unambiguous	LIVNVNDLRR	[R].LIVNVNDLRR.[K]			0.0740038	0.00434873	0.386	1	2	4	P25205	P25205 [47-56]			DNA replication licensing factor mcm3 [OS=Homo sapiens]	P25205; P25205-2	1	1211.72	10	FALSE	0.01	-6.64			413699		55.63		4		194224		21034.6		178076	217842							416659		56927.1
FALSE		High	Unambiguous	LMDLLGEGLKR	[R].LMDLLGEGLKR.[S]			0.0163443	0.0010893	0.656	1	2	4	P54136-1	P54136-1 [462-472]			arginine--tRNA ligase, cytoplasmic [OS=Homo sapiens]	P54136-1; P54136-2	1	1244.7	11	FALSE
FALSE		High	Unambiguous	IMDPDVITGYNIQNFDLPYLISR	[R].IMDPDVITGYNIQNFDLPYLISR.[A]			0.00303236	0.0010893	0.954	1	1	1	P28340	P28340 [387-409]			DNA polymerase delta catalytic subunit [OS=Homo sapiens]	P28340	0	2697.36	23	FALSE
FALSE		High	Unambiguous	IMDPNIVGSEHYDVAR	[R].IMDPNIVGSEHYDVAR.[G]			0.000139261	0.0010893	1.497	1	1	19	P06576	P06576 [407-422]			ATP synthase subunit beta, mitochondrial [OS=Homo sapiens]	P06576	0	1815.87	16	FALSE	1.267	0.34	0.23677	0.448241	5.12479e+06	6.49475e+06	34.89	26.63	6	6	1.5848e+06	717793	1979075	1.79291e+06	3.00944e+06	3086936	4.12175e+06	4.18064e+06	5946852	6.78279e+06	5414504	7.27635e+06	3.3998e+06	2.50043e+06	5.35608e+06	4.90349e+06
FALSE		High	Unambiguous	IMEGPAFNFLDAPAVR	[R].IMEGPAFNFLDAPAVR.[V]			0.000906681	0.0010893	1.167	1	3	6	P11177	P11177 [309-324]			Pyruvate dehydrogenase E1 component subunit beta, mitochondrial [OS=Homo sapiens]	P11177-2; P11177-3; P11177	0	1747.88	16	FALSE
FALSE		High	Unambiguous	LMNDMTAVALNYGIYK	[R].LMNDMTAVALNYGIYK.[Q]			9.46436e-05	0.0010893	1.565	1	4	5	Q92598	Q92598 [170-185]			Heat shock protein 105 kDa [OS=Homo sapiens]	Q92598-3; Q92598-2; Q92598-4; Q92598	0	1816.9	16	FALSE
FALSE		High	Unambiguous	LMNETTAVALAYGIYK	[R].LMNETTAVALAYGIYK.[Q]			0.000162341	0.0010893	1.47	2	2	2	O95757; P34932	O95757 [170-185]; P34932 [170-185]			Heat shock 70 kDa protein 4L [OS=Homo sapiens] Heat shock 70 kDa protein 4 [OS=Homo sapiens]	O95757; P34932	0	1757.91	16	FALSE
FALSE		High	Unambiguous	LNDLEDALQQAKEDLAR	[K].LNDLEDALQQAKEDLAR.[L]			0.000146564	0.0010893	1.488	1	1	32	KRT1	KRT1 [444-460]			Keratin, type II cytoskeletal 1 OS=Homo sapiens GN=KRT1 PE=1 SV=6	KRT1	1	1941.99	17	TRUE	1.263	0.34	0.110233	0.277576	1.15954e+06	1.464e+06	43.93	14.98	6	4	546798	329040	181146	177383	685767	662948	1.49585e+06	1.6244e+06			1.14645e+06	1.00543e+06	1.17302e+06	1.14621e+06	490246	485130
FALSE		High	Unambiguous	INEMVHFDLPGQEER	[R].INEMVHFDLPGQEER.[E]			1.37521e-06	0.0010893	2.31	1	3	17	Q9NVI7	Q9NVI7 [515-529]			ATPase family AAA domain-containing protein 3A [OS=Homo sapiens]	Q9NVI7-3; Q9NVI7-2; Q9NVI7	0	1813.85	15	FALSE	0.01	-6.64			361911		73.78		6		72066.7	29916.5	328158	295482	164393	165538							154601	104214	888114	808126
FALSE		High	Unambiguous	INLAEDVLAWEHER	[R].INLAEDVLAWEHER.[F]			0.0183997	0.0010893	0.635	1	2	10	Q969V3	Q969V3 [361-374]			Nicalin [OS=Homo sapiens]	Q969V3-2; Q969V3	0	1694.85	14	FALSE
FALSE		High	Unambiguous	LNLPVNVHSR	[R].LNLPVNVHSR.[S]			0.053489	0.00272876	0.445	1	5	7	Q17R31-1	Q17R31-1 [140-149]			Putative deoxyribonuclease TATDN3 [OS=Homo sapiens]	Q17R31-3; Q17R31-2; Q17R31-1; Q17R31-5; Q17R31-4	0	1148.65	10	FALSE	0.01	-6.64			276610		17.98		6		144201	105759	113046	90295.2	108421	112365							309347	368411	305942	246952
FALSE		High	Unambiguous	LNIPVSQVNPR	[R].LNIPVSQVNPR.[D]			0.0221623	0.00194901	0.602	1	6	2	P05023	P05023 [648-658]			Sodium/potassium-transporting ATPase subunit alpha-1 [OS=Homo sapiens]	P13637-3; P13637-2; P05023; P05023-4; P05023-3; P13637-1	0	1236.71	11	FALSE
FALSE		High	Unambiguous	LNLVEAFVEDAELR	[R].LNLVEAFVEDAELR.[Q]			1.02581e-07	0.0010893	2.767	1	2	22	P43246-1	P43246-1 [360-373]			DNA mismatch repair protein MSH2 [OS=Homo sapiens]	P43246-1; P43246-2	0	1617.85	14	FALSE	0.01	-6.64			373877		7.2		6		175337	106077	134473	135881	188721	194482							376142	369520	363932	371625
FALSE		High	Unambiguous	INLWHLEITDR	[R].INLWHLEITDR.[S]			0.00278541	0.0010893	0.969	1	3	30	P63151	P63151 [200-210]			Serine/threonine-protein phosphatase 2A 55 kDa regulatory subunit B alpha isoform [OS=Homo sapiens]	Q66LE6; P63151-2; P63151	0	1409.75	11	FALSE	100	6.64				1.65702e+06		22.7		2									1.32703e+06	1.94831e+06
FALSE		High	Unambiguous	LNRPSSAAQLQTR	[R].LNRPSSAAQLQTR.[I]			6.73111e-05	0.0010893	1.625	1	2	8	Q96H55-1	Q96H55-1 [493-505]			unconventional myosin-XIX [OS=Homo sapiens]	Q96H55-3; Q96H55-1	0	1441.79	13	FALSE	0.01	-6.64			183992		61.12		6		62295.6	72719.1	141145	132204	37091.4	44732.4							133640	253317	381990	361571
FALSE		High	Unambiguous	INVYYNEATGNKYVPR	[R].INVYYNEATGNKYVPR.[A]			0.123481	0.00860454	0.29	1	1	2	Q9BVA1	Q9BVA1 [47-62]			Tubulin beta-2B chain [OS=Homo sapiens]	Q9BVA1	1	1900.96	16	FALSE	100	6.64				781604		9.06		3							771458	759192				573007
FALSE		High	Unambiguous	IPDEFDNDPILVQQLRR	[K].IPDEFDNDPILVQQLRR.[T]			0.074408	0.00434873	0.385	1	2	8	Q3ZCQ8	Q3ZCQ8 [98-114]			Mitochondrial import inner membrane translocase subunit TIM50 [OS=Homo sapiens]	Q3ZCQ8; Q3ZCQ8-2	1	2068.08	17	FALSE	0.01	-6.64			515735		25.33		4		327827	164086			201736	188239							703273	571593
FALSE		High	Unambiguous	LPEYPQVDDLLLR	[R].LPEYPQVDDLLLR.[R]			0.0384765	0.00194901	0.504	1	3	1	Q9UI10-1	Q9UI10-1 [144-156]			translation initiation factor eIF-2B subunit delta [OS=Homo sapiens]	Q9UI10-3; Q9UI10-2; Q9UI10-1	0	1570.85	13	FALSE
FALSE		High	Unambiguous	LPEYPQVDDLLLRR	[R].LPEYPQVDDLLLRR.[L]			0.133451	0.00860454	0.275	1	3	4	Q9UI10-1	Q9UI10-1 [144-157]			translation initiation factor eIF-2B subunit delta [OS=Homo sapiens]	Q9UI10-3; Q9UI10-2; Q9UI10-1	1	1726.95	14	FALSE	0.01	-6.64			614835		46.62		6		357602	182546	71575.7	84363.7	262994	298640							767147	635899	193709	230730
FALSE		High	Unambiguous	IPGSTEAFPHQHR	[R].IPGSTEAFPHQHR.[V]			4.21034e-06	0.0010893	2.113	1	1	57	Q96ST3	Q96ST3 [20-32]			Paired amphipathic helix protein Sin3a [OS=Homo sapiens]	Q96ST3	0	1476.73	13	FALSE	0.624	-0.68	0.0192986	0.0958991	6.32753e+06	3.95052e+06	24.93	35.44	6	6	2.61372e+06	2.04982e+06	3.16147e+06	2.86821e+06	1.985e+06	2.42622e+06	3.82265e+06	5.33273e+06	3.79447e+06	4.1461e+06	1.27749e+06	2.66745e+06	5.60709e+06	7.14054e+06	8.55607e+06	7.84437e+06
FALSE		High	Unambiguous	LPLAQVSAHPWVR	[R].LPLAQVSAHPWVR.[A]			0.000237509	0.0010893	1.403	1	4	8	Q96GD4	Q96GD4 [316-328]			Aurora kinase B [OS=Homo sapiens]	Q96GD4-2; Q96GD4; Q96GD4-4; Q96GD4-5	0	1473.83	13	FALSE	0.01	-6.64			2.10704e+06		73.04		6		1.95608e+06	353406	229654	222204	1768515	1.72829e+06							4.19629e+06	1.23109e+06	621526	607713
FALSE		High	Unambiguous	LPLLLTHEGVLLPGSTMR	[R].LPLLLTHEGVLLPGSTMR.[T]			0.0250877	0.00194901	0.58	1	2	7	Q86WA8	Q86WA8 [13-30]			Lon protease homolog 2, peroxisomal [OS=Homo sapiens]	Q86WA8; Q86WA8-2	0	1947.11	18	FALSE	0.01	-6.64			129178		54.51		6		73622.8	19614.9	39039.2	30538	119584	108568							157939	68328.5	105654	83519.5
FALSE		High	Unambiguous	IPLLSDLTHQISK	[R].IPLLSDLTHQISK.[D]			0.00519154	0.0010893	0.859	1	1	4	Q13162	Q13162 [174-186]			Peroxiredoxin-4 [OS=Homo sapiens]	Q13162	0	1464.84	13	FALSE
FALSE		High	Unambiguous	LPLQLDDAVRPEAEGEEEGR	[R].LPLQLDDAVRPEAEGEEEGR.[A]			9.83628e-07	0.0010893	2.369	1	2	24	P14868	P14868 [152-171]			Aspartate--tRNA ligase, cytoplasmic [OS=Homo sapiens]	P14868; P14868-2	0	2223.09	20	FALSE	0.957	-0.06	0.224916	0.445533	965048	923641	31.89	32.59	6	3	465543	262194	615071	568601	404274	389936		477047	869732	969886			998708	913354	1.6646e+06	1.55509e+06
FALSE		High	Unambiguous	LPVDLAEELGHR	[R].LPVDLAEELGHR.[D]			0.00294771	0.0010893	0.959	1	3	8	P42771-1	P42771-1 [113-124]			cyclin-dependent kinase inhibitor 2A [OS=Homo sapiens]	P42771-1; P42771-2; P42771-4	0	1348.72	12	FALSE	1.244	0.32	0.105101	0.27158	611681	761074	10.95	8.28	5	2	272328		262141	257508	242244	293147			675871	806998			584212		709448	704270
FALSE		High	Unambiguous	LQAMAPEEILQEQQR	[R].LQAMAPEEILQEQQR.[L]			0.0229246	0.00194901	0.596	1	2	1	Q9BWH6	Q9BWH6 [235-249]			RNA polymerase II-associated protein 1 [OS=Homo sapiens]	Q9BWH6; Q9BWH6-2	0	1783.9	15	FALSE
FALSE		High	Unambiguous	LQDEIQNMKEEMAR	[R].LQDEIQNMKEEMAR.[H]			0.00806923	0.0010893	0.781	1	1	7	P08670	P08670 [365-378]			Vimentin [OS=Homo sapiens]	P08670	1	1734.81	14	FALSE	0.01	-6.64			315583		78.01		5		147108	69168.2	297279	284421		19083							315583	240948	804542	777874
FALSE		High	Unambiguous	IQDKEGIPPDQQR	[K].IQDKEGIPPDQQR.[L]			0.00788886	0.0010893	0.785	1	4	61	RPS27A	RPS27A [30-42]			Ubiquitin-40S ribosomal protein S27a OS=Homo sapiens GN=RPS27A PE=1 SV=2	P62987; RPS27A; P0CG47; P0CG48	1	1523.78	13	TRUE	0.834	-0.26	0.76181	0.873252	355456	296624	34.73	21.36	4	4			164386	159379	86437.8	138916	239288	380293	264742	312948					444887	435892
FALSE		High	Unambiguous	IQDWYDKKGPAAIQK	[K].IQDWYDKKGPAAIQK.[N]			0.0200237	0.0010893	0.62	1	1	5	KRT9	KRT9 [185-199]			Keratin, type I cytoskeletal 9 OS=Homo sapiens GN=KRT9 PE=1 SV=3	KRT9	2	1760.93	15	TRUE	0.769	-0.38	0.0836472	0.240307	283962	218494	6.08	24.4	4	4	132165	75491			132343	136297	238902	241806			114372	168593	283527	262973
FALSE		High	Unambiguous	LQEDPNYSPQRFPNAQR	[R].LQEDPNYSPQRFPNAQR.[A]			0.0772958	0.00514875	0.378	1	5	2	P46379-1	P46379-1 [1110-1126]			Large proline-rich protein BAG6 [OS=Homo sapiens]	P46379-3; P46379-5; P46379-4; P46379-2; P46379-1	1	2059.99	17	FALSE	0.01	-6.64			102788		48.48		6		58757.9	33471.9	12400.3	12117.2	43734.9	50192							126050	116599	33559.7	33139.8
FALSE		High	Unambiguous	LQGDANNLHGFEVDSR	[R].LQGDANNLHGFEVDSR.[V]			0.00151906	0.0010893	1.076	1	4	4	P52434	P52434 [125-140]			DNA-directed RNA polymerases I, II, and III subunit RPABC3 [OS=Homo sapiens]	P52434-3; P52434-2; P52434; P52434-5	0	1771.84	16	FALSE	0.01	-6.64			302519		28.75		6		165252	88720.2	113599	108843	70590.6	87595.3							354507	309057	307438	297678
FALSE		High	Unambiguous	IQIVSQMVELVENR	[K].IQIVSQMVELVENR.[T]			2.2084e-07	0.0010893	2.632	1	5	18	Q9UK53-1	Q9UK53-1 [232-245]			inhibitor of growth protein 1 [OS=Homo sapiens]	Q9UK53-2; Q9UK53-5; Q9UK53-3; Q9UK53-4; Q9UK53-1	0	1657.89	14	FALSE	0.519	-0.95	0.0447746	0.174243	4.78493e+06	2.48442e+06	62.38	52.83	6	6	1.61448e+06	1.02924e+06	4.3219e+06	4.75314e+06	1.63359e+06	2.91196e+06	1.6372e+06	1.69518e+06	4847186	5.34948e+06	2.05291e+06	2.0834e+06	3.46348e+06	3.58537e+06	1.16966e+07	1.29995e+07
FALSE		High	Unambiguous	IQIVTQMLELVENR	[K].IQIVTQMLELVENR.[A]			3.61172e-06	0.0010893	2.14	1	2	14	Q9H160	Q9H160 [101-114]			Inhibitor of growth protein 2 [OS=Homo sapiens]	Q9H160; Q9H160-2	0	1685.93	14	FALSE	0.01	-6.64			959327		35.37		6		249649	174664	333273	373079	608431	566952							535560	608443	901955	1.02035e+06
FALSE		High	Unambiguous	LQPYNGVALRPWDGNSDDR	[R].LQPYNGVALRPWDGNSDDR.[V]			0.0255154	0.00194901	0.577	1	3	6	Q3ZCQ8	Q3ZCQ8 [256-274]			Mitochondrial import inner membrane translocase subunit TIM50 [OS=Homo sapiens]	Q3ZCQ8; Q3ZCQ8-3; Q3ZCQ8-2	0	2173.04	19	FALSE	0.01	-6.64			2.71534e+06		16.22		6		1.13582e+06	756024	1.26642e+06	1.31599e+06	1.15608e+06	1.32506e+06							2.43663e+06	2.63361e+06	3.42738e+06	3.59916e+06
FALSE		High	Unambiguous	LQQQQAQQPLQQQQQR	[R].LQQQQAQQPLQQQQQR.[N]			1.95572e-06	0.0010893	2.248	1	4	5	Q9NVH2	Q9NVH2 [941-956]			Integrator complex subunit 7 [OS=Homo sapiens]	Q9NVH2-4; Q9NVH2-3; Q9NVH2-2; Q9NVH2	0	1978.02	16	FALSE	0.01	-6.64			134851		68.41		4			69730.3	52737.7	46585.8	8728.04									242905	142727	127409
FALSE		High	Unambiguous	LQSIGTENTEENRR	[R].LQSIGTENTEENRR.[F]			0.0768769	0.00514875	0.379	1	3	6	ALDOA	ALDOA [44-57]			Fructose-bisphosphate aldolase A OS=Oryctolagus cuniculus GN=ALDOA PE=1 SV=2	P04075; P04075-2; ALDOA	1	1646.81	14	TRUE	0.01	-6.64			223862		79.18		4				172721	183830	32687.2	51379.8									467444	502765
FALSE		High	Unambiguous	IQVDAYFSPIHSQLDHLLDPSSFTGR	[R].IQVDAYFSPIHSQLDHLLDPSSFTGR.[A]			0.000851831	0.0010893	1.178	1	1	17	P30566	P30566 [427-452]			adenylosuccinate lyase [OS=Homo sapiens]	P30566	0	2943.46	26	FALSE	0.01	-6.64			1.07575e+06		35.48		6		454715	340555	589961	645877	379758	335709							975478	1.18632e+06	1.59665e+06	1.76643e+06
FALSE		High	Unambiguous	LQWHLPEGAAFSWLPNPER	[R].LQWHLPEGAAFSWLPNPER.[S]			0.0418514	0.00272876	0.489	1	4	4	Q96H55-1	Q96H55-1 [251-269]			unconventional myosin-XIX [OS=Homo sapiens]	Q96H55-4; Q96H55-3; Q96H55-1; Q96H55-2	0	2248.13	19	FALSE	0.01	-6.64			237821		38.75		5		91586.4	64269.2	161081	157542	103102								196476	223882	435942	430868
FALSE		High	Unambiguous	IRELLQQMER	[K].IRELLQQMER.[G]			0.0798533	0.00514875	0.372	1	1	1	O43813	O43813 [40-49]			LanC-like protein 1 [OS=Homo sapiens]	O43813	1	1315.72	10	FALSE
FALSE		High	Unambiguous	LREVHGGGAER	[R].LREVHGGGAER.[E]			0.0137214	0.0010893	0.687	1	3	2	Q9BTW9	Q9BTW9 [43-53]			Tubulin-specific chaperone D [OS=Homo sapiens]	Q9BTW9-5; Q9BTW9; Q9BTW9-4	1	1180.62	11	FALSE
FALSE		High	Unambiguous	LRGDWSDTGPR	[R].LRGDWSDTGPR.[A]			0.000335822	0.0010893	1.342	1	4	11	Q58WW2	Q58WW2 [312-322]			DDB1- and CUL4-associated factor 6 [OS=Homo sapiens]	Q58WW2-2; Q58WW2-4; Q58WW2-3; Q58WW2	1	1259.61	11	FALSE	0.207	-2.27	0.452401	0.671909	330512	68398.5	73.28	107.56	6	5	3947.29	213763	166769	159649	84160.4	119901	326307	435617	64406.4	32669.8	23550.1		8467.93	744644	451336	436630
FALSE		High	Unambiguous	LRGPSGGGEEPALSQYQR	[R].LRGPSGGGEEPALSQYQR.[L]			0.00115711	0.0010893	1.124	1	1	4	Q99567	Q99567 [83-100]			Nuclear pore complex protein Nup88 [OS=Homo sapiens]	Q99567	1	1901.95	18	FALSE	0.01	-6.64			134454		30.08		5			54857.5	36865.6	33528.9	58718.9	64436.6								191096	99771.3	91699.5
FALSE		High	Unambiguous	LRLEEVGAER	[R].LRLEEVGAER.[A]			0.00112476	0.0010893	1.129	1	1	28	Q9HCU9	Q9HCU9 [88-97]			Breast cancer metastasis-suppressor 1 [OS=Homo sapiens]	Q9HCU9	1	1171.64	10	FALSE	0.523	-0.93	0.139036	0.315007	1.52973e+06	800410	31.03	68.95	6	5	936449	697839	568488	556126	516551	525956	1.50929e+06	1.7099e+06		192247	442793	684175	2.00892e+06	2.43092e+06	1.53853e+06	1.52097e+06
FALSE		High	Unambiguous	IRLENEIQTYR	[K].IRLENEIQTYR.[S]			0.00191646	0.0010893	1.035	1	1	52	KRT10	KRT10 [440-450]			Keratin, type I cytoskeletal 10 OS=Homo sapiens GN=KRT10 PE=1 SV=6	KRT10	1	1434.77	11	TRUE	0.682	-0.55	0.382869	0.609196	5.90331e+06	4.02373e+06	27.06	45.86	6	6	2.01354e+06	1.11309e+06	2890445	2709721	2.63927e+06	2.74336e+06	3.36315e+06	3691892	7177536	8428439	2414946	3.58773e+06	4.31956e+06	3.87746e+06	7.82257e+06	7.41092e+06
FALSE		High	Unambiguous	IRLPYELQK	[R].IRLPYELQK.[M]			0.0568511	0.00272876	0.434	1	1	2	O95757	O95757 [85-93]			Heat shock 70 kDa protein 4L [OS=Homo sapiens]	O95757	1	1159.68	9	FALSE
FALSE		High	Unambiguous	IRNAELFLQLETEQVER	[R].IRNAELFLQLETEQVER.[N]			0.000374074	0.0010893	1.323	1	1	34	Q9H7L9	Q9H7L9 [110-126]			Sin3 histone deacetylase corepressor complex component SDS3 [OS=Homo sapiens]	Q9H7L9	1	2088.11	17	FALSE	100	6.64				3.5339e+06		84.38		6							3.83335e+06	3.07761e+06	460624	494539	7.09017e+06	5.20322e+06
FALSE		High	Unambiguous	LRQEEPQSLQAAVR	[R].LRQEEPQSLQAAVR.[T]			0.0785649	0.00514875	0.375	1	12	1	P29590	P29590 [359-372]			Protein PML [OS=Homo sapiens]	P29590-5; P29590-13; P29590-12; P29590-2; P29590-14; P29590-4; P29590-10; P29590-9; P29590-8; P29590; P29590-3; P29590-11	1	1624.88	14	FALSE
FALSE		High	Unambiguous	LRSEIDNVKK	[R].LRSEIDNVKK.[Q]			0.000207247	0.0010893	1.427	2	3	45	KRT1; KRT5	KRT1 [408-417]; KRT5 [397-406]			Keratin, type II cytoskeletal 1 OS=Homo sapiens GN=KRT1 PE=1 SV=6 Keratin, type II cytoskeletal 5 OS=Bos taurus GN=KRT5 PE=1 SV=1	KRT1; KRT5; Krt5	2	1201.69	10	TRUE	0.478	-1.06	0.238393	0.448241	4.14512e+06	1.98304e+06	71.24	98.49	6	6	1.29602e+06	1.77406e+06	4.36965e+06	3.80543e+06	891474	1.25746e+06	1.01141e+06	1.95986e+06	7.77121e+06	8.96123e+06	546561	1.64153e+06	2.7803e+06	6.17993e+06	1.18258e+07	1.04076e+07
FALSE		High	Unambiguous	LSDNTPEHYLVQGR	[R].LSDNTPEHYLVQGR.[Y]			0.0269942	0.00194901	0.567	1	1	4	Q9ULE6	Q9ULE6 [85-98]			paladin [OS=Homo sapiens]	Q9ULE6	0	1628.8	14	FALSE	0.01	-6.64			147781		16.24		6		70785.1	41285.7	60321.1	55579.6	50038.2	51153.2							151852	143819	163250	152007
FALSE		High	Unambiguous	LSDQFHDILIR	[R].LSDQFHDILIR.[K]			1.90752e-05	0.0010893	1.847	1	2	55	O75340	O75340 [126-136]			programmed cell death protein 6 [OS=Homo sapiens]	O75340-2; O75340	0	1356.73	11	FALSE	1.148	0.2	0.0928877	0.25426	6.27659e+06	7.20622e+06	18.98	23.25	6	6	3.54433e+06	1.84348e+06	1.75105e+06	1.68533e+06	2.77672e+06	2.94775e+06	9527625	9136503	5231963	6341800	5154481	6981093	7.60349e+06	6.42176e+06	4.73897e+06	4.60928e+06
FALSE		High	Unambiguous	ISEQFTAMFRR	[R].ISEQFTAMFRR.[K]			0.0092412	0.0010893	0.757	4	7	29	Q13509; P04350; P07437; Q9BVA1	Q13509 [381-391]; P04350 [381-391]; P07437 [381-391]; Q9BVA1 [381-391]			tubulin beta-3 chain [OS=Homo sapiens] Tubulin beta-4A chain [OS=Homo sapiens] tubulin beta chain [OS=Homo sapiens] Tubulin beta-2B chain [OS=Homo sapiens]	Q13885; Q13509; P04350; Q13509-2; P07437; P68371; Q9BVA1	1	1385.7	11	FALSE	100	6.64				6.59274e+06		45.93		5							6.50716e+06	6.4399e+06	1.21481e+06		5195157	7.25911e+06
FALSE		High	Unambiguous	LSFGDTLQVQNIHGAFNALGGADR	[K].LSFGDTLQVQNIHGAFNALGGADR.[L]			0.00117031	0.0010893	1.122	1	2	6	Q969X5	Q969X5 [153-176]			Endoplasmic reticulum-Golgi intermediate compartment protein 1 [OS=Homo sapiens]	Q969X5-2; Q969X5	0	2501.25	24	FALSE	0.01	-6.64			268117		58.83		2		80264.3				180993								172187
FALSE		High	Unambiguous	LSFQHDPETSVLVLR	[R].LSFQHDPETSVLVLR.[K]			9.73699e-05	0.0010893	1.56	1	2	24	Q14697-1	Q14697-1 [915-929]			Neutral alpha-glucosidase AB [OS=Homo sapiens]	Q14697-1; Q14697-2	0	1740.93	15	FALSE	0.01	-6.64			374512		34.54		6		179818	104377	66195.9	66347.4	171942	202681							385756	363596	179150	181456
FALSE		High	Unambiguous	LSGVMVPAPIQDLEALR	[R].LSGVMVPAPIQDLEALR.[A]			8.02704e-05	0.0010893	1.594	1	2	4	Q9UBB4-1	Q9UBB4-1 [11-27]			Ataxin-10 [OS=Homo sapiens]	Q9UBB4-2; Q9UBB4-1	0	1808.99	17	FALSE	0.01	-6.64			167272		45.27		5		20290.2		61807	56779.2	96836.5	107238							43527.5		167272	155288
FALSE		High	Unambiguous	ISLPLPNFSSLNLR	[R].ISLPLPNFSSLNLR.[E]			0.000353428	0.0010893	1.333	1	1	4	P08670	P08670 [411-424]			Vimentin [OS=Homo sapiens]	P08670	0	1570.9	14	FALSE	0.01	-6.64			69034.4		65.65		5		77388.2	19318	25508.2	31731.6		8968.55							166017	67294.4	69034.4	86784
FALSE		High	Unambiguous	LSNTQGVVSAFSTMMSVHR	[R].LSNTQGVVSAFSTMMSVHR.[G]			0.0492094	0.00272876	0.46	1	1	4	P48047	P48047 [118-136]			ATP synthase subunit O, mitochondrial [OS=Homo sapiens]	P48047	0	2052	19	FALSE
FALSE		High	Unambiguous	LSQLSSHDPLWR	[R].LSQLSSHDPLWR.[R]			1.41167e-05	0.0010893	1.9	1	3	132	Q9UK99	Q9UK99 [43-54]			F-box only protein 3 [OS=Homo sapiens]	Q9UK99-3; Q9UK99; Q9UK99-2	0	1438.74	12	FALSE	0.898	-0.16	0.926948	0.972272	3.07335e+07	2.75896e+07	44.14	51.48	6	6	11703185	6.57948e+06	22299334	21283162	13594883	14435265	23596376	23039296	60049736	62339596	18459150	27029270	2.51063e+07	2.29196e+07	6.03499e+07	5.82081e+07
FALSE		High	Unambiguous	LSQLSSHDPLWRR	[R].LSQLSSHDPLWRR.[H]			0.0207127	0.00194901	0.614	1	3	40	Q9UK99	Q9UK99 [43-55]			F-box only protein 3 [OS=Homo sapiens]	Q9UK99-3; Q9UK99; Q9UK99-2	1	1594.84	13	FALSE	0.629	-0.67	0.424164	0.646249	3.42652e+06	2.15497e+06	69.71	21.56	6	6	2.64956e+06	592979	432304	405654	3.03724e+06	2.87269e+06	2.25752e+06	2.68427e+06	1.91187e+06	1.75493e+06	1.33538e+06	2.27904e+06	5.68397e+06	2.06564e+06	1.16997e+06	1.10944e+06
FALSE		High	Unambiguous	ISSIQSIVPALEIANAHR	[K].ISSIQSIVPALEIANAHR.[K]			0.000891382	0.0010893	1.17	1	1	30	P10809	P10809 [251-268]			60 kDa heat shock protein, mitochondrial [OS=Homo sapiens]	P10809	0	1919.07	18	FALSE	2.564	1.36	0.00174384	0.0187754	1.19751e+06	3.06982e+06	37.33	63.35	6	6	705862	155826	442565	340382	519052	880508	2.36918e+06	2.64642e+06	7.67485e+06	9.07291e+06	2489986	2622533	1.51425e+06	542821	1.19774e+06	930925
FALSE		High	Unambiguous	LTFASTLSHLR	[R].LTFASTLSHLR.[R]			0.0704566	0.00434873	0.395	1	1	15	P30876	P30876 [473-483]			DNA-directed RNA polymerase II subunit RPB2 [OS=Homo sapiens]	P30876	0	1245.69	11	FALSE	0.01	-6.64			582709		14.04		6		282297	116289	197802	223834	250973	281095							605599	405093	535323	612172
FALSE		High	Unambiguous	LTGFHETSNINDFSAGVANR	[R].LTGFHETSNINDFSAGVANR.[S]			0.00140315	0.0010893	1.09	1	1	8	P15104	P15104 [300-319]			Glutamine synthetase [OS=Homo sapiens]	P15104	0	2150.03	20	FALSE	0.01	-6.64			63311.5		42.07		6		19332.2	8804.98	24283.6	22300.8	46219.9	34332.2							41472.5	30672.2	65719.9	60991.4
FALSE		High	Unambiguous	ITPAHDQNDYEVGQR	[K].ITPAHDQNDYEVGQR.[H]			0.108325	0.0064943	0.315	1	1	6	P26640	P26640 [592-606]			Valine--tRNA ligase [OS=Homo sapiens]	P26640	0	1742.81	15	FALSE	0.01	-6.64			154605		48.93		5			69042.6	61596.8	56529.5	26263	44245.7								240510	166703	154605
FALSE		High	Unambiguous	ITPSYVAFTPEGER	[R].ITPSYVAFTPEGER.[L]			0.000441019	0.0010893	1.294	1	1	25	P11021	P11021 [61-74]			78 kDa glucose-regulated protein [OS=Homo sapiens]	P11021	0	1566.78	14	FALSE	0.872	-0.2	0.366044	0.593615	6.08754e+06	5.30929e+06	20.95	24.25	6	6	2661706	1.18698e+06	2163121	2.31457e+06	3.11111e+06	3772025	4032526	3963542	6980120	5.61357e+06	4.07072e+06	5.57515e+06	5.71003e+06	4.13484e+06	5.85418e+06	6.33021e+06
FALSE		High	Unambiguous	ITREEGVLTLWR	[R].ITREEGVLTLWR.[G]			0.00134093	0.0010893	1.098	1	2	21	Q02978	Q02978 [171-182]			Mitochondrial 2-oxoglutarate/malate carrier protein [OS=Homo sapiens]	Q02978-2; Q02978	1	1472.82	12	FALSE	0.893	-0.16	0.92708	0.972272	1.11578e+06	996188	33.66	22.39	6	6	603349	314463	215744	207319	560720	544667	1.09824e+06	1.23126e+06	679877	1.05273e+06	604984	805788	1.29434e+06	1.09543e+06	583879	567003
FALSE		High	Unambiguous	IVALNAHTFLR	[R].IVALNAHTFLR.[N]			0.000791266	0.0010893	1.191	1	2	36	P22087	P22087 [245-255]			rRNA 2'-O-methyltransferase fibrillarin [OS=Homo sapiens]	A6NHQ2; P22087	0	1254.73	11	FALSE	1.406	0.49	0.0330749	0.148377	6.08964e+06	8.55976e+06	9.64	21.82	6	6	3086503	1.51023e+06	2310693	2.16824e+06	2832321	2.5775e+06	8560003	8565611	7955314	10296775	4333870	5737447	6.62133e+06	5.2609e+06	6.25356e+06	5.93001e+06
FALSE		High	Unambiguous	LVGSQEELASWGHEYVR	[R].LVGSQEELASWGHEYVR.[H]			0.0523142	0.00272876	0.449	1	2	3	Q13200	Q13200 [144-160]			26S proteasome non-ATPase regulatory subunit 2 [OS=Homo sapiens]	Q13200; Q13200-3	0	1959.96	17	FALSE	100	6.64				907738		18.64		6							903035	942191	848056	1.06588e+06	474108	722279
FALSE		High	Unambiguous	LVHQNSASDDAEASMISK	[R].LVHQNSASDDAEASMISK.[L]			6.11779e-08	0.0010893	2.858	1	1	23	Q13616	Q13616 [474-491]			Cullin-1 [OS=Homo sapiens]	Q13616	0	1902.89	18	FALSE	0.01	-6.64			414489		97.05		6		111453	100745	795257	769063	174953	204024							239096	350944	2.15225e+06	2.10334e+06
FALSE		High	Unambiguous	LVLEVAQHLGESTVR	[R].LVLEVAQHLGESTVR.[T]			1.82686e-06	0.0010893	2.26	1	1	150	P06576	P06576 [95-109]			ATP synthase subunit beta, mitochondrial [OS=Homo sapiens]	P06576	0	1650.92	15	FALSE	0.691	-0.53	0.00191233	0.0199252	4.26032e+06	2.94229e+06	15.61	13.12	6	6	2.40429e+06	1.26412e+06	1.27029e+06	1.26823e+06	1.90914e+06	1.97534e+06	2.83762e+06	3.30766e+06	2.29917e+06	3011219	2.0725e+06	2.7335e+06	5.1578e+06	4.40356e+06	3.43785e+06	3.46854e+06
FALSE		High	Unambiguous	LVNHFVEEFK	[R].LVNHFVEEFK.[R]			0.00156273	0.0010893	1.071	1	2	29	P0DMV8	P0DMV8 [237-246]			heat shock 70 kDa protein 1A [OS=Homo sapiens]	P0DMV8-2; P0DMV8	0	1261.66	10	FALSE	2.863	1.52	0.00596289	0.044791	3.22035e+06	9.22019e+06	43.35	65.64	6	6	1.01282e+06	606622	2180146	1.89917e+06	1.49652e+06	1439795	6.67562e+06	4.5537e+06	2.3499e+07	2.13983e+07	7.02417e+06	8.38643e+06	2.17276e+06	2.11317e+06	5.90025e+06	5.19412e+06
FALSE		High	Unambiguous	LVNHFVEEFKR	[R].LVNHFVEEFKR.[K]			7.7314e-06	0.0010893	2.006	1	2	303	P0DMV8	P0DMV8 [237-247]			heat shock 70 kDa protein 1A [OS=Homo sapiens]	P0DMV8-2; P0DMV8	1	1417.76	11	FALSE	1.055	0.08	0.524999	0.697777	9.55153e+07	1.00734e+08	16.8	34.16	6	6	3.47255e+07	2.348e+07	3.67993e+07	3.34945e+07	4.90619e+07	5.43246e+07	9.53097e+07	5.77981e+07	9.89515e+07	9.19464e+07	1.28115e+08	131074309	7.4495e+07	8.17926e+07	9.9592e+07	9.16055e+07
FALSE		High	Unambiguous	LVQDVANNTNEEAGDGTTTATVLAR	[K].LVQDVANNTNEEAGDGTTTATVLAR.[S]			1.11455e-06	0.0010893	2.347	1	2	8	P10809	P10809 [97-121]			60 kDa heat shock protein, mitochondrial [OS=Homo sapiens]	P10809; P10809-2	0	2560.25	25	FALSE	100	6.64				2.05674e+06		19.91		6							2.0018e+06	2035502	1.78655e+06	1.36808e+06	2.11888e+06	1782870
FALSE		High	Unambiguous	LVQQRPALPGLAR	[R].LVQQRPALPGLAR.[R]			0.100586	0.0064943	0.329	1	1	3	Q7Z4Q2	Q7Z4Q2 [65-77]			HEAT repeat-containing protein 3 [OS=Homo sapiens]	Q7Z4Q2	0	1418.86	13	FALSE	0.01	-6.64			271281		21.83		6		161585	94599	90419.6	66190.3	119173	128303							346640	329536	244708	181026
FALSE		High	Unambiguous	IWDLNMENRPVETYQVHEYLR	[K].IWDLNMENRPVETYQVHEYLR.[S]			0.000901552	0.0010893	1.168	1	2	8	P63151	P63151 [310-330]			Serine/threonine-protein phosphatase 2A 55 kDa regulatory subunit B alpha isoform [OS=Homo sapiens]	P63151-2; P63151	0	2705.31	21	FALSE	0.01	-6.64			805428		5.07		2				287130	305241											777076	834815
FALSE		High	Unambiguous	IWHHTFYNELR	[K].IWHHTFYNELR.[V]			0.000129348	0.0010893	1.51	2	9	50	ACTB; P68032	ACTB [85-95]; P68032 [87-97]			Actin, cytoplasmic 1 OS=Bos taurus GN=ACTB PE=1 SV=1 Actin, alpha cardiac muscle 1 [OS=Homo sapiens]	A5A3E0; Q9BYX7; P0CG39; ACTB; Q6S8J3; P68133; P0CG38; P68032; P63261	0	1515.75	11	TRUE	2.591	1.37	0.000647361	0.0083639	308521	799393	22.72	43.54	5	6	106991	84925.1	156736	134015		147858	803245	730754	1.41273e+06	1.61986e+06	456018	671202	229522	295837	424182	366522
FALSE		High	Unambiguous	LYDTHITVLDAALETGQLIIMETR	[R].LYDTHITVLDAALETGQLIIMETR.[K]			2.49119e-05	0.0010893	1.8	1	1	7	P51784	P51784 [254-277]			Ubiquitin carboxyl-terminal hydrolase 11 [OS=Homo sapiens]	P51784	0	2716.42	24	FALSE	100	6.64				2.59181e+06		62.62		6							1.38904e+06	619752	4702653	4.33097e+06	1.46318e+06	3.18127e+06
FALSE		High	Unambiguous	IYGDKAPEIIESLK	[R].IYGDKAPEIIESLK.[K]			0.117821	0.00860454	0.299	1	2	1	O75182-1	O75182-1 [547-560]			paired amphipathic helix protein sin3b [OS=Homo sapiens]	O75182-2; O75182-1	1	1575.86	14	FALSE	0.01	-6.64			368250		11.42		6		195803	105667	124793	112198	159715	194697							420046	368092	337733	306853
FALSE		High	Unambiguous	LYQLEEPLSSILDRDDIFVYEVSGR	[K].LYQLEEPLSSILDRDDIFVYEVSGR.[I]			0.000276864	0.0010893	1.376	1	1	6	P51784	P51784 [553-577]			Ubiquitin carboxyl-terminal hydrolase 11 [OS=Homo sapiens]	P51784	1	2956.49	25	FALSE	100	6.64				4.4378e+06		41.11		6							4.493e+06	4.87213e+06	2.09786e+06	1601976	3.50722e+06	4.73479e+06
FALSE		High	Unambiguous	LYQQHGAGLFDVTR	[R].LYQQHGAGLFDVTR.[G]			0.00758284	0.0010893	0.792	1	2	16	O14773	O14773 [507-520]			Tripeptidyl-peptidase 1 [OS=Homo sapiens]	O14773; O14773-2	0	1604.82	14	FALSE	0.01	-6.64			145238		20.55		6		76857.6	47881.5	39866.8	36600.4	60984.7	71864.5							164879	166795	107894	100100
FALSE		High	Unambiguous	LYQSAGGMPGGMPGGFPGGGAPPSGGASSGPTIEEVD	[K].LYQSAGGMPGGMPGGFPGGGAPPSGGASSGPTIEEVD.[-]			1.76745e-09	0.0010893	3.482	1	1	15	P11142-1	P11142-1 [610-646]			Heat shock cognate 71 kDa protein [OS=Homo sapiens]	P11142-1	0	3346.5	37	FALSE	100	6.64				1.06793e+07		70.65		6							1.08285e+06	1.10628e+06	9404541	11419095	11231281	13004702
FALSE		High	Unambiguous	IYSYVVSRPQPR	[R].IYSYVVSRPQPR.[G]			0.0045068	0.0010893	0.884	1	1	6	Q96CS3	Q96CS3 [78-89]			FAS-associated factor 2 [OS=Homo sapiens]	Q96CS3	0	1464.8	12	FALSE	0.01	-6.64			480871		24.85		6		313330	221559	163628	167282	206858	232253							672171	771800	442835	457507
FALSE		High	Unambiguous	LYVGSLHFNITEDMLR	[R].LYVGSLHFNITEDMLR.[G]			0.0178881	0.0010893	0.64	1	8	14	Q86U06-1	Q86U06-1 [265-280]			probable RNA-binding protein 23 [OS=Homo sapiens]	Q86U06-5; Q86U06-3; Q86U06-4; Q86U06-2; Q14498-3; Q86U06-1; Q14498-1; Q14498-2	0	1907.97	16	FALSE	0.01	-6.64			157356		14.24		4			36083.9	59044.6	65453.5		74260.9								125698	159796	179011
FALSE		High	Unambiguous	MAEIGEHVAPSEAANSLEQAQAAAER	[R].MAEIGEHVAPSEAANSLEQAQAAAER.[L]			1.25294e-05	0.0010893	1.921	1	1	11	P27708	P27708 [522-547]			CAD protein [OS=Homo sapiens]	P27708	0	2680.26	26	FALSE	3.901	1.96	0.403529	0.620667	258026	1.00645e+06	67.57	70.91	6	3	99057.6	51798.4	292813	253489	120165	115114			947711	1.38883e+06		163796	212504	180440	792456	693276
FALSE		High	Unambiguous	MAVTFIGNSTAIQELFK	[K].MAVTFIGNSTAIQELFK.[R]			8.39e-07	0.0010893	2.397	1	1	5	P07437	P07437 [363-379]			tubulin beta chain [OS=Homo sapiens]	P07437	0	1869.98	17	FALSE	0.01	-6.64			513026		34.56		6		185339	58118.2	187654	243373	270581	248368							397600	202455	507859	665609
FALSE		High	Unambiguous	MAVTFIGNSTAIQELFKR	[K].MAVTFIGNSTAIQELFKR.[I]			0.0363758	0.00194901	0.514	1	1	5	P07437	P07437 [363-380]			tubulin beta chain [OS=Homo sapiens]	P07437	1	2026.08	18	FALSE	0.01	-6.64			1.68021e+06		54.04		6		837034	451327	270923	248228	1.31012e+06	1.13291e+06							1.79565e+06	1.5722e+06	733215	678889
FALSE		High	Unambiguous	MDLVEAFNHSR	[R].MDLVEAFNHSR.[G]			0.0334342	0.00194901	0.529	1	1	5	Q9UNY4-1	Q9UNY4-1 [1049-1059]			transcription termination factor 2 [OS=Homo sapiens]	Q9UNY4-1	0	1318.62	11	FALSE	0.01	-6.64			132329		40.3		5		47337		42424.2	48384.6	91931.3	120075							101550		114815	132329
FALSE		High	Unambiguous	MDYEDDRLR	[R].MDYEDDRLR.[D]			0.0600811	0.00272876	0.424	1	1	4	P43243	P43243 [217-225]			Matrin-3 [OS=Homo sapiens]	P43243	1	1212.53	9	FALSE	1.241	0.31	0.488009	0.688327	801294	994593	53.3	84.96	5	3	160064		542072	526248	274009	384018	13522.2		986254	994593			343378		1.46704e+06	1.43926e+06
FALSE		High	Unambiguous	MFGGPGTASRPSSSR	[R].MFGGPGTASRPSSSR.[S]			2.74373e-05	0.0010893	1.783	1	1	18	P08670	P08670 [14-28]			Vimentin [OS=Homo sapiens]	P08670	0	1494.71	15	FALSE	0.481	-1.06	0.050613	0.186395	5.18466e+06	2.49144e+06	4.04	47.51	2	4			1.9712e+06	1.84237e+06			1.13086e+06	1.72776e+06	3.25138e+06	3.43854e+06					5.33478e+06	5.03877e+06
FALSE		High	Unambiguous	MKEEEWREAQR	[K].MKEEEWREAQR.[G]			0.104945	0.0064943	0.321	1	1	10	Q96ST3	Q96ST3 [701-711]			Paired amphipathic helix protein Sin3a [OS=Homo sapiens]	Q96ST3	2	1491.7	11	FALSE	0.01	-6.64			87315.3		81.01		4				14450.2	10986.3	84516.1	95076.1									39107.3	30046.8
FALSE		High	Unambiguous	MKEIAEAYLGK	[K].MKEIAEAYLGK.[T]			0.0116492	0.0010893	0.716	1	2	5	P11142-1	P11142-1 [127-137]			Heat shock cognate 71 kDa protein [OS=Homo sapiens]	P11142-1; P11142-2	1	1252.66	11	FALSE	100	6.64				581522		59.4		6							301196	306750	617200	1.34471e+06	418241	622706
FALSE		High	Unambiguous	MKEIAEAYLGYPVTNAVITVPAYFNDSQR	[K].MKEIAEAYLGYPVTNAVITVPAYFNDSQR.[Q]			8.35262e-05	0.0010893	1.587	1	1	23	P0DMV8	P0DMV8 [127-155]			heat shock 70 kDa protein 1A [OS=Homo sapiens]	P0DMV8	1	3260.63	29	FALSE	100	6.64				1.75571e+08		28.53		5							89563904		154445002	194360790	142328008	186518862
FALSE		High	Unambiguous	MKETAEAYLGK	[K].MKETAEAYLGK.[K]			0.000747621	0.0010893	1.201	1	1	12	P11021	P11021 [153-163]			78 kDa glucose-regulated protein [OS=Homo sapiens]	P11021	1	1240.62	11	FALSE	100	6.64				1.67946e+06		63.99		4									2.79293e+06	2.74831e+06	521634	877262
FALSE		High	Unambiguous	MKETAENYLGHTAK	[K].MKETAENYLGHTAK.[N]			0.001485	0.0010893	1.08	1	1	9	P38646	P38646 [174-187]			Stress-70 protein, mitochondrial [OS=Homo sapiens]	P38646	1	1592.77	14	FALSE
FALSE		High	Unambiguous	MIEAVQNHIGSLNWGYR	[R].MIEAVQNHIGSLNWGYR.[V]			0.0155351	0.0010893	0.665	1	7	4	Q16881-1	Q16881-1 [251-267]			Thioredoxin reductase 1, cytoplasmic [OS=Homo sapiens]	Q16881-5; Q16881-1; Q16881-2; Q16881-4; Q16881-3; Q16881-7; Q16881-6	0	1987.98	17	FALSE
FALSE		High	Unambiguous	MLIAMVDVIFADVAQPDQTR	[R].MLIAMVDVIFADVAQPDQTR.[I]			0.0097232	0.0010893	0.748	1	1	4	P22087	P22087 [225-244]			rRNA 2'-O-methyltransferase fibrillarin [OS=Homo sapiens]	P22087	0	2233.14	20	FALSE
FALSE		High	Unambiguous	MLPTIIADNAGYDSADLVAQLR	[R].MLPTIIADNAGYDSADLVAQLR.[A]			0.000149932	0.0010893	1.484	1	2	3	P78371-1	P78371-1 [445-466]			T-complex protein 1 subunit beta [OS=Homo sapiens]	P78371-2; P78371-1	0	2347.2	22	FALSE
FALSE		High	Unambiguous	MLSFQGLAELAHR	[R].MLSFQGLAELAHR.[E]			6.69298e-05	0.0010893	1.626	1	1	29	O15294	O15294 [18-30]			UDP-N-acetylglucosamine--peptide N-acetylglucosaminyltransferase 110 kDa subunit [OS=Homo sapiens]	O15294	0	1472.77	13	FALSE	1.244	0.31	0.527946	0.697777	3.49256e+06	4.34345e+06	49.69	52.72	6	6	579300	260170	1279475	1.28802e+06	1.8636e+06	1.8194e+06	1.37351e+06	1.24023e+06	4617997	6.15958e+06	3.58405e+06	3.64744e+06	1.24274e+06	906303	3.46272e+06	3.52266e+06
FALSE		High	Unambiguous	MLSGGFGYSPFLSITDGNMPGTRPASR	[R].MLSGGFGYSPFLSITDGNMPGTRPASR.[R]			0.0185037	0.0010893	0.634	1	1	1	Q15773	Q15773 [30-56]			Myeloid leukemia factor 2 [OS=Homo sapiens]	Q15773	0	2816.35	27	FALSE
FALSE		High	Unambiguous	MMVADVFSHR	[R].MMVADVFSHR.[F]			3.8885e-06	0.0010893	2.127	1	1	58	P51784	P51784 [540-549]			Ubiquitin carboxyl-terminal hydrolase 11 [OS=Homo sapiens]	P51784	0	1192.56	10	FALSE	3.683	1.88	0.0820819	0.240307	9.98428e+06	3.67733e+07	68.06	80.2	6	6	714793	343019	3867898	3.48198e+06	6369572	5.7854e+06	4.37403e+06	4280968	31868640	39956088	6.16046e+07	36305528	1.53341e+06	1.19491e+06	1.04679e+07	9.523e+06
FALSE		High	Unambiguous	MNDIVKEFEDR	[R].MNDIVKEFEDR.[G]			0.0489361	0.00272876	0.461	1	2	2	P54136-1	P54136-1 [342-352]			arginine--tRNA ligase, cytoplasmic [OS=Homo sapiens]	P54136-1; P54136-2	1	1395.66	11	FALSE
FALSE		High	Unambiguous	MQEHSDQVPVGNIPR	[K].MQEHSDQVPVGNIPR.[S]			0.0151884	0.0010893	0.669	1	3	9	P33993-1	P33993-1 [237-251]			DNA replication licensing factor MCM7 [OS=Homo sapiens]	P33993-2; P33993-1; P33993-3	0	1706.83	15	FALSE
FALSE		High	Unambiguous	MQQYDLQGQPYGTR	[R].MQQYDLQGQPYGTR.[N]			0.0627895	0.00359603	0.416	1	2	3	Q969V3	Q969V3 [51-64]			Nicalin [OS=Homo sapiens]	Q969V3-2; Q969V3	0	1684.77	14	FALSE
FALSE		High	Unambiguous	MRPGAYSTGYGGYEEYSGLSDGYGFTTDLFGR	[R].MRPGAYSTGYGGYEEYSGLSDGYGFTTDLFGR.[D]			5.61243e-05	0.0010893	1.657	1	1	3	P52597	P52597 [231-262]			Heterogeneous nuclear ribonucleoprotein F [OS=Homo sapiens]	P52597	0	3474.52	32	FALSE
FALSE		High	Unambiguous	MSATFIGNSTAIQELFKR	[K].MSATFIGNSTAIQELFKR.[I]			0.0249468	0.00194901	0.581	1	3	14	Q9BVA1	Q9BVA1 [363-380]			Tubulin beta-2B chain [OS=Homo sapiens]	Q13885; P68371; Q9BVA1	1	2014.04	18	FALSE
FALSE		High	Unambiguous	MSVEADINGLRR	[R].MSVEADINGLRR.[V]			0.0325068	0.00194901	0.534	2	4	10	KRT14; KRT19	KRT14 [212-223]; KRT19 [177-188]			Keratin, type I cytoskeletal 14 OS=Homo sapiens GN=KRT14 PE=1 SV=4 Keratin, type I cytoskeletal 19 OS=Homo sapiens GN=KRT19 PE=1 SV=4	KRT14; KRT19; Krt42; Krt17	1	1360.7	12	TRUE	0.99	-0.01	0.73017	0.863901	423156	418999	31.32	31.39	6	4	204271	117301	106885	114580	271483	282762	455779		234738		308203	473050	438212	408617	289269	313370
FALSE		High	Unambiguous	MTADGRLPADQR	[R].MTADGRLPADQR.[R]			0.0562252	0.00272876	0.436	1	2	12	Q02978	Q02978 [147-158]			Mitochondrial 2-oxoglutarate/malate carrier protein [OS=Homo sapiens]	Q02978-2; Q02978	1	1330.65	12	FALSE	0.01	-6.64			255566		26.93		6		75320.5	75039.9	127818	104193	80885	119745							161581	261401	345920	284963
FALSE		High	Unambiguous	MTHNLLLNYGLYR	[R].MTHNLLLNYGLYR.[K]			6.44648e-06	0.0010893	2.038	2	3	151	Q13547; Q92769	Q13547 [37-49]; Q92769 [38-50]			histone deacetylase 1 [OS=Homo sapiens] Histone deacetylase 2 [OS=Homo sapiens]	Q13547; Q92769; Q92769-3	0	1607.84	13	FALSE	0.857	-0.22	0.619295	0.778335	2.93425e+07	2.51488e+07	28.49	36.04	6	6	8.43999e+06	4.72204e+06	1.25476e+07	1.16393e+07	1.38917e+07	1.29623e+07	2.00907e+07	2.07263e+07	3.78241e+07	4.52813e+07	1.74009e+07	2.49646e+07	1.81059e+07	1.64492e+07	3.39583e+07	3.18327e+07
FALSE		High	Unambiguous	MVNHFIAEFK	[R].MVNHFIAEFK.[R]			0.0300433	0.00194901	0.548	1	2	5	P11142-1	P11142-1 [237-246]			Heat shock cognate 71 kDa protein [OS=Homo sapiens]	P11142-1; P11142-2	0	1235.62	10	FALSE	100	6.64				534362		55.99		4							319634	299972			714796	810156
FALSE		High	Unambiguous	MVNHFIAEFKR	[R].MVNHFIAEFKR.[K]			8.89113e-05	0.0010893	1.576	1	2	20	P11142-1	P11142-1 [237-247]			Heat shock cognate 71 kDa protein [OS=Homo sapiens]	P11142-1; P11142-2	1	1391.73	11	FALSE	0.657	-0.61	0.0945615	0.256667	1.18189e+06	776357	49.82	14.31	6	2	579871	322352	275605	253899	1.05483e+06	856695			660466	859320			1.24397e+06	1.12291e+06	745886	694399
FALSE		High	Unambiguous	MVQEAEKYKAEDEVQR	[R].MVQEAEKYKAEDEVQR.[E]			0.000343536	0.0010893	1.338	1	2	16	P0DMV8	P0DMV8 [518-533]			heat shock 70 kDa protein 1A [OS=Homo sapiens]	P0DMV8-2; P0DMV8	2	1952.94	16	FALSE	0.525	-0.93	0.0162913	0.0877016	485212	254649	26.95	12.95	4	3	184520	103754			257844	296458	237136	292915				217669	395842	361426
FALSE		High	Unambiguous	MVVNEGSDGGQSVYHVHLHVLGGR	[R].MVVNEGSDGGQSVYHVHLHVLGGR.[Q]			0.0115837	0.0010893	0.717	1	1	12	P49773	P49773 [96-119]			Histidine triad nucleotide-binding protein 1 [OS=Homo sapiens]	P49773	0	2547.25	24	FALSE	0.01	-6.64			66700		75.21		6		18606.4	7611.13	66877.9	69091	22175	41683.6							39915.3	26513.4	180995	188960
FALSE		High	Unambiguous	MYSTDDGVQFHAFGR	[K].MYSTDDGVQFHAFGR.[V]			0.016907	0.0010893	0.65	1	3	5	Q15029	Q15029 [481-495]			116 kDa U5 small nuclear ribonucleoprotein component [OS=Homo sapiens]	Q15029-2; Q15029-3; Q15029	0	1730.76	15	FALSE	0.01	-6.64			108880		26.89		6		49201.1	20991.7	37155.9	41067	65962.3	73309.1							105549	73124.5	100557	112316
FALSE		High	Unambiguous	NAELFLQLETEQVER	[R].NAELFLQLETEQVER.[N]			1.2191e-08	0.0010893	3.142	1	1	35	Q9H7L9	Q9H7L9 [112-126]			Sin3 histone deacetylase corepressor complex component SDS3 [OS=Homo sapiens]	Q9H7L9	0	1818.92	15	FALSE
FALSE		High	Unambiguous	NAHSATTWSGQYVGGAEAR	[R].NAHSATTWSGQYVGGAEAR.[I]			2.12706e-08	0.0010893	3.044	1	1	326	P22629	P22629 [109-127]			Streptavidin OS=Streptomyces avidinii PE=1 SV=1	P22629	0	1962.91	19	TRUE	0.01	-6.64			6.04041e+06		65.81		6		2.30162e+06	2.6644e+06	1.0358e+06	692913	5.88027e+06	3.54146e+06							4.93755e+06	9.28143e+06	2.80325e+06	1.89507e+06
FALSE		High	Unambiguous	NALESYAFNMK	[K].NALESYAFNMK.[S]			1.1441e-05	0.0010893	1.937	2	3	22	P0DMV8; P34931	P0DMV8 [540-550]; P34931 [542-552]			heat shock 70 kDa protein 1A [OS=Homo sapiens] Heat shock 70 kDa protein 1-like [OS=Homo sapiens]	P0DMV8-2; P0DMV8; P34931	0	1287.6	11	FALSE	3.011	1.59	0.209913	0.426427	431126	1.29803e+06	100.16	54.16	6	6	286206	23982.9	87467.3	110689	784675	951424	399958	533630	1.03114e+06	1.90349e+06	1.24731e+06	1710734	613984	83544.5	236718	302727
FALSE		High	Unambiguous	NAVEEYVYDFR	[K].NAVEEYVYDFR.[D]			0.0600811	0.00272876	0.424	1	1	2	O95757	O95757 [622-632]			Heat shock 70 kDa protein 4L [OS=Homo sapiens]	O95757	0	1404.64	11	FALSE
FALSE		High	Unambiguous	NAVEEYVYEFR	[K].NAVEEYVYEFR.[D]			0.000448593	0.0010893	1.291	1	4	15	Q92598	Q92598 [636-646]			Heat shock protein 105 kDa [OS=Homo sapiens]	Q92598-3; Q92598-2; Q92598-4; Q92598	0	1418.66	11	FALSE	0.01	-6.64			311573		32.83		6		152198	85352.5	92446.5	161161	93259.2	240149							326502	297326	250193	440764
FALSE		High	Unambiguous	NDIASHPPVEGSYAPR	[R].NDIASHPPVEGSYAPR.[R]			0.000414321	0.0010893	1.305	1	1	2	Q7KZF4	Q7KZF4 [716-731]			staphylococcal nuclease domain-containing protein 1 [OS=Homo sapiens]	Q7KZF4	0	1709.82	16	FALSE
FALSE		High	Unambiguous	NDIVSARPDEWLGR	[R].NDIVSARPDEWLGR.[C]			0.0894326	0.00584769	0.351	1	2	2	Q8IZ52	Q8IZ52 [268-281]			Chondroitin sulfate synthase 2 [OS=Homo sapiens]	Q8IZ52-4; Q8IZ52	0	1627.82	14	FALSE	0.01	-6.64			91686.2		28.48		6		45296.7	24591.4	31965.2	31236.1	69511.6	60154.9							97172.9	85664.3	86509.3	85428.8
FALSE		High	Unambiguous	NDSVIVDTFHGLFK	[R].NDSVIVDTFHGLFK.[S]			4.44646e-05	0.0010893	1.698	1	3	65	P51784	P51784 [450-463]			Ubiquitin carboxyl-terminal hydrolase 11 [OS=Homo sapiens]	P51784; Q13107-2; Q13107-1	0	1591.81	14	FALSE	0.759	-0.4	0.120077	0.29161	7.9554e+06	6.03976e+06	29.24	11.87	6	6	3194245	1.13689e+06	2853581	2.99641e+06	4.52249e+06	4.60171e+06	4.93954e+06	4.55134e+06	5837865	6.36536e+06	4.80904e+06	5.25623e+06	6.85246e+06	3.96037e+06	7.72281e+06	8.19499e+06
FALSE		High	Unambiguous	NELESYAYSLK	[R].NELESYAYSLK.[N]			0.0195772	0.0010893	0.624	1	1	6	P11021	P11021 [563-573]			78 kDa glucose-regulated protein [OS=Homo sapiens]	P11021	0	1316.64	11	FALSE
FALSE		High	Unambiguous	NELMYQLEQDHDLQAILQER	[K].NELMYQLEQDHDLQAILQER.[E]			0.00125272	0.0010893	1.11	1	1	2	Q08211	Q08211 [366-385]			Atp-dependent rna helicase a [OS=Homo sapiens]	Q08211	0	2486.2	20	FALSE
FALSE		High	Unambiguous	NFTTEQVTAMLLSK	[R].NFTTEQVTAMLLSK.[L]			6.96445e-05	0.0010893	1.619	1	1	2	P34932	P34932 [111-124]			Heat shock 70 kDa protein 4 [OS=Homo sapiens]	P34932	0	1582.81	14	FALSE	100	6.64				555684		16.51		2									465337	624844
FALSE		High	Unambiguous	NFYQEHPDLAR	[K].NFYQEHPDLAR.[R]			0.0201369	0.0010893	0.619	1	2	6	P17844	P17844 [57-67]			probable ATP-dependent RNA helicase DDX5 [OS=Homo sapiens]	P17844-2; P17844	0	1389.65	11	FALSE	0.01	-6.64			397347		19		6		230297	155999	159160	129690	152919	175663							494046	543421	430743	354695
FALSE		High	Unambiguous	NHEEEMKDLR	[K].NHEEEMKDLR.[N]			0.0384765	0.00194901	0.504	1	1	31	KRT10	KRT10 [286-295]			Keratin, type I cytoskeletal 10 OS=Homo sapiens GN=KRT10 PE=1 SV=6	KRT10	1	1300.6	10	TRUE	0.01	-6.64			1.02737e+06		28.93		4				552386	445897	355387	414795									1.49495e+06	1.2195e+06
FALSE		High	Unambiguous	NHEEEMLALR	[K].NHEEEMLALR.[G]			0.00549367	0.0010893	0.849	1	3	2	KRT16	KRT16 [254-263]			Keratin, type I cytoskeletal 16 OS=Homo sapiens GN=KRT16 PE=1 SV=4	Krt16; Krt16; KRT16	0	1241.59	10	TRUE
FALSE		High	Unambiguous	NHPGLLLMDTTFR	[R].NHPGLLLMDTTFR.[D]			0.0115837	0.0010893	0.717	1	1	1	P11498	P11498 [559-571]			pyruvate carboxylase, mitochondrial [OS=Homo sapiens]	P11498	0	1514.78	13	FALSE
FALSE		High	Unambiguous	NKLEGLEDALQK	[K].NKLEGLEDALQK.[A]			2.72819e-05	0.0010893	1.784	1	3	7	KRT6B	KRT6B [425-436]			Keratin, type II cytoskeletal 6B OS=Homo sapiens GN=KRT6B PE=1 SV=5	KRT6B; KRT6A; KRT6C	1	1357.73	12	TRUE	0.01	-6.64			201812		84.14		5			37362.8	49978.2	73790.4	339517	362819								130153	135259	201812
FALSE		High	Unambiguous	NKLNDLEDALQQAK	[K].NKLNDLEDALQQAK.[E]			1.81651e-06	0.0010893	2.261	1	1	31	KRT1	KRT1 [442-455]			Keratin, type II cytoskeletal 1 OS=Homo sapiens GN=KRT1 PE=1 SV=6	KRT1	1	1599.83	14	TRUE	1.155	0.21	0.0589792	0.19844	2.02579e+06	2.33967e+06	16.1	27.49	6	6	754130	413578	797698	760448	943868	945651	3363034	3.36031e+06	2.12489e+06	2425798	1.44153e+06	1.82011e+06	1.6178e+06	1.4407e+06	2.15886e+06	2.07978e+06
FALSE		High	Unambiguous	NKLNDLEDALQQAKEDLAR	[K].NKLNDLEDALQQAKEDLAR.[L]			1.22753e-06	0.0010893	2.33	1	1	44	KRT1	KRT1 [442-460]			Keratin, type II cytoskeletal 1 OS=Homo sapiens GN=KRT1 PE=1 SV=6	KRT1	2	2184.13	19	TRUE	0.085	-3.55	0.0892362	0.248477	3.64668e+06	311450	75.43	103.43	6	3	1.70217e+06	1.04544e+06	284335	260337	3.36218e+06	1.98506e+06		1.58332e+06	293272	296016			3.65159e+06	3.64179e+06	769511	712005
FALSE		High	Unambiguous	NKLNDLEEALQQAK	[R].NKLNDLEEALQQAK.[E]			8.7907e-05	0.0010893	1.578	1	1	17	KRT2	KRT2 [440-453]			Keratin, type II cytoskeletal 2 epidermal OS=Homo sapiens GN=KRT2 PE=1 SV=2	KRT2	1	1613.85	14	TRUE
FALSE		High	Unambiguous	NKYEDEINKR	[KR].NKYEDEINKR.[T]			0.00118366	0.0010893	1.12	3	12	93	KRT1; KRT6B; KRT5	KRT1 [268-277]; KRT6B [251-260]; KRT5 [257-266]			Keratin, type II cytoskeletal 1 OS=Homo sapiens GN=KRT1 PE=1 SV=6 Keratin, type II cytoskeletal 6B OS=Homo sapiens GN=KRT6B PE=1 SV=5 Keratin, type II cytoskeletal 5 OS=Bos taurus GN=KRT5 PE=1 SV=1	H-INV:HIT000016045; KRT1; KRT6B; KRT6A; P05787-2; Krt79; KRT5; KRT6C; Krt77; KRT8; Krt5; KRT5	2	1308.65	10	TRUE	0.172	-2.54	0.0363464	0.154439	5.59778e+06	963497	65.64	101.04	6	6	933800	2.28659e+06	4.31199e+06	4.1304e+06	1.14918e+06	1.88533e+06	993941	882313	4474323	5216516	206080	767488	2.00324e+06	7.96533e+06	1.16698e+07	1.12964e+07
FALSE		High	Unambiguous	NLDIERPTYTNLNR	[R].NLDIERPTYTNLNR.[L]			1.19316e-06	0.0010893	2.335	3	11	171	Q13748-1; P68363; Q9BQE3	Q13748-1 [216-229]; P68363 [216-229]; Q9BQE3 [216-229]			tubulin alpha-3C/D chain [OS=Homo sapiens] Tubulin alpha-1B chain [OS=Homo sapiens] Tubulin alpha-1C chain [OS=Homo sapiens]	Q13748-1; Q6PEY2; Q13748-2; Q71U36; Q9NY65; P68366-2; P68363; Q71U36-2; Q9BQE3; Q9NY65-2; P68366	0	1718.88	14	FALSE	0.897	-0.16	0.362431	0.593615	1.86067e+08	1.66956e+08	13.12	14.56	6	6	9.78497e+07	5.97302e+07	5.76532e+07	5.65835e+07	80767224	8.90594e+07	197864768	187944832	149758544	148785552	114206216	149813392	2.09912e+08	2.0807e+08	1.5603e+08	1.54752e+08
FALSE		High	Unambiguous	NILDDFREAYFWLR	[R].NILDDFREAYFWLR.[Q]			0.021066	0.00194901	0.611	1	1	2	Q8TCJ2	Q8TCJ2 [579-592]			Dolichyl-diphosphooligosaccharide--protein glycosyltransferase subunit STT3B [OS=Homo sapiens]	Q8TCJ2	1	1857.93	14	FALSE	0.01	-6.64			74783.8		37.74		6		48749.6	38609.4	30578.6	24709.6	24560.4	25529.2							104580	134496	82756.6	67579.2
FALSE		High	Unambiguous	NLQEEIDALESR	[K].NLQEEIDALESR.[V]			8.64218e-05	0.0010893	1.581	1	1	25	Q9NQP4	Q9NQP4 [93-104]			Prefoldin subunit 4 [OS=Homo sapiens]	Q9NQP4	0	1416.7	12	FALSE	0.703	-0.51	0.160652	0.350611	591036	415768	26.24	49.57	5	6	381381	128544	218388	217041		213770	403069	405140	656636	623271	197206	129692	818159	447782	591036	593594
FALSE		High	Unambiguous	NLSNEEMIQAADELEEMKR	[R].NLSNEEMIQAADELEEMKR.[V]			0.000136132	0.0010893	1.501	1	2	16	Q15170	Q15170 [119-137]			transcription elongation factor A protein-like 1 [OS=Homo sapiens]	Q15170; Q15170-2	1	2250.04	19	FALSE	100	6.64				7.69158e+06		71.9		6							940851	708792	7.11387e+06	7.83082e+06	9029341	9832143
FALSE		High	Unambiguous	NMGGPYGGGNYGPGGSGGSGGYGGR	[R].NMGGPYGGGNYGPGGSGGSGGYGGR.[S]			0.000167017	0.0010893	1.465	1	2	2	P22626	P22626 [326-350]			heterogeneous nuclear ribonucleoproteins A2/B1 [OS=Homo sapiens]	P22626-2; P22626	0	2189.91	25	FALSE	0.01	-6.64			78974.4		65.96		5		32376.9	20610.1	71641.9	97582.5		37848.3							69456.6	71795.2	193888	266882
FALSE		High	Unambiguous	NNEDISIIPPLFTVSVDHR	[R].NNEDISIIPPLFTVSVDHR.[G]			0.0137214	0.0010893	0.687	1	1	6	P51571	P51571 [121-139]			translocon-associated protein subunit delta [OS=Homo sapiens]	P51571	0	2166.12	19	FALSE	100	6.64				1022224		24.48		5							817354	1.13253e+06	1353714	1022224	667762
FALSE		High	Unambiguous	NNRPSEGPLQTR	[K].NNRPSEGPLQTR.[L]			0.00229745	0.0010893	1.003	1	2	4	Q00610-1	Q00610-1 [572-583]			Clathrin heavy chain 1 [OS=Homo sapiens]	Q00610-1; Q00610-2	0	1368.7	12	FALSE	0.01	-6.64			194058		81.15		3				74976.5	70955.3		4125.66									202913	194058
FALSE		High	Unambiguous	NPPGFAFVEFEDPRDAADAVR	[R].NPPGFAFVEFEDPRDAADAVR.[E]			0.01607	0.0010893	0.659	1	2	5	P84103	P84103 [44-64]			Serine/arginine-rich splicing factor 3 [OS=Homo sapiens]	P84103-2; P84103	1	2320.1	21	FALSE
FALSE		High	Unambiguous	NQILNLTTDNANILLQIDNAR	[K].NQILNLTTDNANILLQIDNAR.[L]			0.000656149	0.0010893	1.224	1	1	2	KRT10	KRT10 [208-228]			Keratin, type I cytoskeletal 10 OS=Homo sapiens GN=KRT10 PE=1 SV=6	KRT10	0	2367.26	21	TRUE	100	6.64				3.36339e+06		16.23		2									2.82218e+06	3774433
FALSE		High	Unambiguous	NQLTSNPENTVFDAK	[K].NQLTSNPENTVFDAK.[R]			2.22368e-05	0.0010893	1.82	1	1	22	P11021	P11021 [82-96]			78 kDa glucose-regulated protein [OS=Homo sapiens]	P11021	0	1677.81	15	FALSE	1.076	0.11	0.66644	0.806854	1.13594e+06	1.22218e+06	27.85	56.6	6	6	531791	184354	417934	410723	622431	767215	794948	898346	2330653	1.59142e+06	492166	2.12681e+06	1.14083e+06	642197	1.13108e+06	1.1233e+06
FALSE		High	Unambiguous	NQLTSNPENTVFDAKR	[K].NQLTSNPENTVFDAKR.[L]			0.00263203	0.0010893	0.979	1	1	32	P11021	P11021 [82-97]			78 kDa glucose-regulated protein [OS=Homo sapiens]	P11021	1	1833.91	16	FALSE	0.776	-0.37	0.758382	0.873252	9.76936e+06	7.58366e+06	59.13	56.54	6	6	4.57737e+06	2.79011e+06	718408	675195	4.93778e+06	5.46464e+06	8383157	8.06268e+06	1.77163e+06	1.91462e+06	5.53443e+06	8655564	9.81961e+06	9.71936e+06	1.94427e+06	1.84662e+06
FALSE		High	Unambiguous	NQQITHANNTVSNFK	[K].NQQITHANNTVSNFK.[R]			0.0704566	0.00434873	0.395	1	4	10	Q92598	Q92598 [54-68]			Heat shock protein 105 kDa [OS=Homo sapiens]	Q92598-3; Q92598-2; Q92598-4; Q92598	0	1715.85	15	FALSE	0.01	-6.64			85483.5		72.37		4				60386.9	60640.2	13566.1	21428.8									163428	165847
FALSE		High	Unambiguous	NQQITHANNTVSNFKR	[K].NQQITHANNTVSNFKR.[F]			0.0170988	0.0010893	0.648	1	4	7	Q92598	Q92598 [54-69]			Heat shock protein 105 kDa [OS=Homo sapiens]	Q92598-3; Q92598-2; Q92598-4; Q92598	1	1871.95	16	FALSE	0.01	-6.64			211941		19.6		6		90258.3	63797.1	83179.8	73903.3	123257	75755.9							193627	222237	225114	202121
FALSE		High	Unambiguous	NQVALNPQNTVFDAK	[K].NQVALNPQNTVFDAK.[R]			7.8372e-07	0.0010893	2.409	1	2	20	P0DMV8	P0DMV8 [57-71]			heat shock 70 kDa protein 1A [OS=Homo sapiens]	P0DMV8-2; P0DMV8	0	1658.85	15	FALSE	1.297	0.37	0.358526	0.593615	7.00035e+06	9.07724e+06	59.63	15.97	6	6	5628697	916951	1.48222e+06	1.50723e+06	5153811	6598882	8357187	8585658	6.54131e+06	9185242	8.67527e+06	9309412	1.2075e+07	3.1942e+06	4.01141e+06	4.12218e+06
FALSE		High	Unambiguous	NQVALNPQNTVFDAKR	[K].NQVALNPQNTVFDAKR.[L]			0.00200534	0.0010893	1.027	1	2	109	P0DMV8	P0DMV8 [57-72]			heat shock 70 kDa protein 1A [OS=Homo sapiens]	P0DMV8-2; P0DMV8	1	1814.95	16	FALSE	0.47	-1.09	0.395388	0.615994	2.27434e+08	1.06979e+08	66.98	66.7	6	6	1.12808e+08	6.46323e+07	8.50234e+06	7772200	1.00768e+08	1.10105e+08	116803104	122524352	13412510	13664937	78398480	118059320	2.42001e+08	2.25147e+08	2.30104e+07	2.12565e+07
FALSE		High	Unambiguous	NQVAMNPTNTVFDAK	[K].NQVAMNPTNTVFDAK.[R]			9.43179e-06	0.0010893	1.971	1	2	4	P11142-1	P11142-1 [57-71]			Heat shock cognate 71 kDa protein [OS=Homo sapiens]	P11142-1; P11142-2	0	1649.8	15	FALSE	0.01	-6.64			484080		98.18		6		137157	34371.4	166283	190395	872601	1.03058e+06							294236	119733	450020	520718
FALSE		High	Unambiguous	NQVAMNPTNTVFDAKR	[K].NQVAMNPTNTVFDAKR.[L]			0.0222876	0.00194901	0.601	1	2	35	P11142-1	P11142-1 [57-72]			Heat shock cognate 71 kDa protein [OS=Homo sapiens]	P11142-1; P11142-2	1	1805.9	16	FALSE	2.261	1.18	0.283251	0.502791	2.69852e+06	6.10171e+06	117.95	106.56	6	6	1.43963e+06	676875	678491	617905	1.06727e+07	10636997	6.01487e+06	5847360	4.18626e+06	4.61907e+06	27146056	37264272	3.08836e+06	2.35789e+06	1.83624e+06	1.68993e+06
FALSE		High	Unambiguous	NSKIEISELNR	[R].NSKIEISELNR.[V]			5.09585e-05	0.0010893	1.674	1	1	31	KRT1	KRT1 [393-403]			Keratin, type II cytoskeletal 1 OS=Homo sapiens GN=KRT1 PE=1 SV=6	KRT1	1	1302.7	11	TRUE	0.624	-0.68	0.274075	0.497338	1.58881e+06	991250	62.75	79.97	6	6	1.02475e+06	756309	146324	143017	679303	772074	1.55551e+06	1.73552e+06	93605.2	52776.9	658563	1.03386e+06	2.19835e+06	2.6346e+06	396006	391143
FALSE		High	Unambiguous	NSLESYAFNMK	[K].NSLESYAFNMK.[A]			5.7414e-05	0.0010893	1.653	1	1	16	P11142-1	P11142-1 [540-550]			Heat shock cognate 71 kDa protein [OS=Homo sapiens]	P11142-1	0	1303.6	11	FALSE	2.236	1.16	0.215101	0.431537	441118	986518	90.34	28.24	6	6	437134	59566.2	63012.4	69344.8	713995	817045	1.24596e+06	1.29531e+06	665575	764300	655276	1.02915e+06	937763	207499	170534	189654
FALSE		High	Unambiguous	NTKQEIAEINR	[R].NTKQEIAEINR.[M]			0.131402	0.00860454	0.278	1	4	1	KRT6B	KRT6B [376-386]			Keratin, type II cytoskeletal 6B OS=Homo sapiens GN=KRT6B PE=1 SV=5	KRT6B; KRT6A; Krt6a; KRT6C	1	1315.7	11	TRUE
FALSE		High	Unambiguous	NVLGHMQQGGAPSPFDR	[K].NVLGHMQQGGAPSPFDR.[N]			0.092357	0.00584769	0.345	1	2	2	Q01813	Q01813 [667-683]			ATP-dependent 6-phosphofructokinase, platelet type [OS=Homo sapiens]	Q01813; Q01813-2	0	1810.87	17	FALSE
FALSE		High	Unambiguous	NVQALEIELQSQLALK	[R].NVQALEIELQSQLALK.[Q]			8.74091e-05	0.0010893	1.579	1	1	15	KRT10	KRT10 [371-386]			Keratin, type I cytoskeletal 10 OS=Homo sapiens GN=KRT10 PE=1 SV=6	KRT10	0	1797.01	16	TRUE
FALSE		High	Unambiguous	NVQDAIADAEQR	[K].NVQDAIADAEQR.[G]			0.00206297	0.0010893	1.022	1	1	3	KRT2	KRT2 [419-430]			Keratin, type II cytoskeletal 2 epidermal OS=Homo sapiens GN=KRT2 PE=1 SV=2	KRT2	0	1329.64	12	TRUE
FALSE		High	Unambiguous	NVVSGGFPIIRDQIFR	[K].NVVSGGFPIIRDQIFR.[Y]			0.110052	0.0064943	0.312	1	3	2	Q9UK99	Q9UK99 [255-270]			F-box only protein 3 [OS=Homo sapiens]	Q9UK99-3; Q9UK99; Q9UK99-2	1	1818	16	FALSE
FALSE		High	Unambiguous	NYAHALDGLYR	[R].NYAHALDGLYR.[V]			0.0274543	0.00194901	0.564	1	2	33	Q9UBX3	Q9UBX3 [140-150]			Mitochondrial dicarboxylate carrier [OS=Homo sapiens]	Q9UBX3-2; Q9UBX3	0	1292.64	11	FALSE	0.01	-6.64			2.64085e+06		26.17		6		1357046	788472	587924	571431	1.2133e+06	1.21687e+06							2.91121e+06	2.74664e+06	1.59113e+06	1.56283e+06
FALSE		High	Unambiguous	NYSPYYNTIDDLKDQIVDLTVGNNK	[K].NYSPYYNTIDDLKDQIVDLTVGNNK.[T]			0.0483939	0.00272876	0.463	1	1	8	KRT9	KRT9 [200-224]			Keratin, type I cytoskeletal 9 OS=Homo sapiens GN=KRT9 PE=1 SV=3	KRT9	1	2902.41	25	TRUE	0.01	-6.64			460026		25.65		6		139904	174794	134351	153192	218976	264113							300129	608893	363603	418971
FALSE		High	Unambiguous	QAAVGQGDFHLLDHR	[R].QAAVGQGDFHLLDHR.[G]			0.00737154	0.0010893	0.797	1	1	23	O43819	O43819 [96-110]			Protein SCO2 homolog, mitochondrial [OS=Homo sapiens]	O43819	0	1663.83	15	FALSE	1.084	0.12	0.92498	0.972272	1.16701e+06	1.2645e+06	11.12	20.03	6	6	632324	345205	418478	352456	524987	535866	1.26174e+06	1.30074e+06	1.17781e+06	1.35021e+06	622983	860892	1.3565e+06	1.20252e+06	1.13255e+06	963946
FALSE		High	Unambiguous	QAHLTNQYMQR	[R].QAHLTNQYMQR.[M]			0.119681	0.00860454	0.296	1	2	1	P11940-1	P11940-1 [375-385]			Polyadenylate-binding protein 1 [OS=Homo sapiens]	P11940-2; P11940-1	0	1389.67	11	FALSE
FALSE		High	Unambiguous	QAVTNPNNTFYATKR	[R].QAVTNPNNTFYATKR.[L]			0.000389239	0.0010893	1.316	1	1	19	P38646	P38646 [108-122]			Stress-70 protein, mitochondrial [OS=Homo sapiens]	P38646	1	1724.87	15	FALSE	0.01	-6.64			1.63084e+07		66.75		6		7.951e+06	10546561	2.40955e+06	2.27097e+06	6.75991e+06	8524090							1.70569e+07	3.67389e+07	6.5211e+06	6.21097e+06
FALSE		High	Unambiguous	QDLPSLDEKPR	[K].QDLPSLDEKPR.[I]			0.111803	0.00726596	0.309	1	4	3	Q92598	Q92598 [186-196]			Heat shock protein 105 kDa [OS=Homo sapiens]	Q92598-3; Q92598-2; Q92598-4; Q92598	0	1297.67	11	FALSE	0.01	-6.64			1.28676e+06		39.26		3			165197	478704	470491										575464	1.29554e+06	1.28676e+06
FALSE		High	Unambiguous	QEQATEENAGVPVGPHLSLAYEDK	[R].QEQATEENAGVPVGPHLSLAYEDK.[Q]			2.28496e-07	0.0010893	2.626	1	1	49	Q96ST3	Q96ST3 [761-784]			Paired amphipathic helix protein Sin3a [OS=Homo sapiens]	Q96ST3	0	2582.24	24	FALSE	2.683	1.42	0.652645	0.798707	583223	1.56505e+06	113.18	92.5	6	4	218690	124761	1792386	1.67041e+06	243153	290647	504594		4471321	4.64663e+06		450579	469146	434606	4.85084e+06	4.56846e+06
FALSE		High	Unambiguous	QEYDESGPSIVHR	[K].QEYDESGPSIVHR.[K]			0.000308404	0.0010893	1.357	1	7	7	ACTB	ACTB [360-372]			Actin, cytoplasmic 1 OS=Bos taurus GN=ACTB PE=1 SV=1	A5A3E0; Q9BYX7; P0CG39; ACTB; Q6S8J3; P0CG38; P63261	0	1516.7	13	TRUE	0.607	-0.72	0.516851	0.697777	381830	231643	102.94	112	5	4	48992.3		847678	838082	142258	182991	29297.5	25551.9	1.75516e+06	1.80773e+06			105101		2.29412e+06	2.2921e+06
FALSE		High	Unambiguous	QFPGLAHEAR	[R].QFPGLAHEAR.[L]			0.00468889	0.0010893	0.877	1	1	2	Q8NAT1	Q8NAT1 [181-190]			Protein O-linked-mannose beta-1,4-N-acetylglucosaminyltransferase 2 [OS=Homo sapiens]	Q8NAT1	0	1125.58	10	FALSE
FALSE		High	Unambiguous	QGPAETGGQGQPQGPGLR	[R].QGPAETGGQGQPQGPGLR.[T]			0.112984	0.00806133	0.307	1	1	2	O43819	O43819 [41-58]			Protein SCO2 homolog, mitochondrial [OS=Homo sapiens]	O43819	0	1734.85	18	FALSE	0.01	-6.64			24506.5		9.84		2				8445.37	9607.55											22856.2	26276.1
FALSE		High	Unambiguous	QHLGATGGPGAQLGASFLQAR	[R].QHLGATGGPGAQLGASFLQAR.[H]			1.64932e-06	0.0010893	2.278	1	1	48	Q9NWW5	Q9NWW5 [8-28]			ceroid-lipofuscinosis neuronal protein 6 [OS=Homo sapiens]	Q9NWW5	0	2037.06	21	FALSE	0.699	-0.52	0.0109935	0.0696255	1.26348e+06	883407	15.45	17.85	6	6	694574	403264	407618	389087	638050	544618	1.15717e+06	1.10529e+06	805465	891854	618355	747968	1.49004e+06	1.40477e+06	1.10316e+06	1.06413e+06
FALSE		High	Unambiguous	QIEEENREREWER	[R].QIEEENREREWER.[E]			0.0943548	0.00584769	0.341	1	1	2	Q96ST3	Q96ST3 [916-928]			Paired amphipathic helix protein Sin3a [OS=Homo sapiens]	Q96ST3	2	1802.84	13	FALSE	100	6.64				607056		23.65		2							506111	687852
FALSE		High	Unambiguous	QIFHPEQLITGK	[R].QIFHPEQLITGK.[E]			0.0106428	0.0010893	0.732	3	13	42	Q13748-1; P68363; Q9BQE3	Q13748-1 [85-96]; P68363 [85-96]; Q9BQE3 [85-96]			tubulin alpha-3C/D chain [OS=Homo sapiens] Tubulin alpha-1B chain [OS=Homo sapiens] Tubulin alpha-1C chain [OS=Homo sapiens]	Q13748-1; Q6PEY2; Q13748-2; Q71U36; Q9NY65; P68366-2; P68363; Q71U36-2; Q9BQE3; P68363-2; Q9H853; Q9NY65-2; P68366	0	1410.77	12	FALSE	1.132	0.18	0.718016	0.852644	1.12417e+06	1.27274e+06	27.51	27.42	6	6	515435	325279	680721	647599	483511	499955	1.22405e+06	1.25016e+06	1.59215e+06	2.05125e+06	811764	1.00934e+06	1.10574e+06	1.13311e+06	1.84227e+06	1.77114e+06
FALSE		High	Unambiguous	QLFHPEQLITGKEDAANNYAR	[R].QLFHPEQLITGKEDAANNYAR.[G]			0.000233497	0.0010893	1.406	3	11	49	Q13748-1; P68363; Q9BQE3	Q13748-1 [85-105]; P68363 [85-105]; Q9BQE3 [85-105]			tubulin alpha-3C/D chain [OS=Homo sapiens] Tubulin alpha-1B chain [OS=Homo sapiens] Tubulin alpha-1C chain [OS=Homo sapiens]	Q13748-1; Q13748-2; Q71U36; Q9NY65; P68366-2; P68363; Q71U36-2; Q9BQE3; P68363-2; Q9NY65-2; P68366	1	2415.21	21	FALSE	1.351	0.43	0.944969	0.972272	1.31015e+06	1.76961e+06	42.02	62.98	6	6	592810	594134	261927	238185	660149	646859	2.7223e+06	1.62981e+06	220175	534276	1.56075e+06	1.57191e+06	1.27173e+06	2.06967e+06	708867	651422
FALSE		High	Unambiguous	QILEDAAALIIHHVK	[K].QILEDAAALIIHHVK.[R]			8.81035e-06	0.0010893	1.983	1	1	72	Q96ST3	Q96ST3 [785-799]			Paired amphipathic helix protein Sin3a [OS=Homo sapiens]	Q96ST3	0	1670.96	15	FALSE	1.814	0.86	0.477336	0.676497	593320	1.07646e+06	106.34	78.19	6	6	263694	135557	1.48148e+06	1.50553e+06	269784	235418	965510	804946	4.18232e+06	3.18742e+06	940918	853368	565690	472211	4.0094e+06	4.11753e+06
FALSE		High	Unambiguous	QILEDAAALIIHHVKR	[K].QILEDAAALIIHHVKR.[Q]			0.00487832	0.0010893	0.87	1	1	37	Q96ST3	Q96ST3 [785-800]			Paired amphipathic helix protein Sin3a [OS=Homo sapiens]	Q96ST3	1	1827.06	16	FALSE
FALSE		High	Unambiguous	QLLLFQFAHHLELWR	[R].QLLLFQFAHHLELWR.[L]			0.0323244	0.00194901	0.535	1	3	2	Q969X6	Q969X6 [345-359]			U3 small nucleolar RNA-associated protein 4 homolog [OS=Homo sapiens]	Q969X6-3; Q969X6-2; Q969X6	0	1951.07	15	FALSE	0.01	-6.64			123904		51.67		6		56317.1	36478.6	93973.8	99896.8	39900.5	42816							120814	127073	254326	273212
FALSE		High	Unambiguous	QIMHHFIPDLLFAQR	[K].QIMHHFIPDLLFAQR.[G]			1.8022e-05	0.0010893	1.857	1	1	189	Q96ST3	Q96ST3 [814-828]			Paired amphipathic helix protein Sin3a [OS=Homo sapiens]	Q96ST3	0	1865.98	15	FALSE	1.171	0.23	0.239367	0.448241	2.50481e+06	2.93373e+06	37.07	77.86	6	6	876848	333220	907324	934233	1.63727e+06	1.53939e+06	2.9504e+06	2.75577e+06	8.8932e+06	1.00637e+07	2.25738e+06	1069041	1.88106e+06	1.16077e+06	2.45554e+06	2.55507e+06
FALSE		High	Unambiguous	QINHPELHMVLSNLAAVLMHR	[R].QINHPELHMVLSNLAAVLMHR.[E]			5.72164e-06	0.0010893	2.059	1	1	4	Q6DKK2	Q6DKK2 [311-331]			tetratricopeptide repeat protein 19, mitochondrial [OS=Homo sapiens]	Q6DKK2	0	2423.28	21	FALSE	0.01	-6.64			1.28365e+06		62.33		4				982695	677661	385432	292620									2.65952e+06	1.85336e+06
FALSE		High	Unambiguous	QINWTVLYRR	[R].QINWTVLYRR.[K]			0.00504675	0.0010893	0.864	1	1	16	P83731	P83731 [48-57]			60S ribosomal protein L24 [OS=Homo sapiens]	P83731	1	1348.75	10	FALSE	1.062	0.09	0.763855	0.873252	1.55504e+06	1.65146e+06	74.13	66.53	6	5	1.2284e+06	677474	82229	56468.3	770982	651651	2811597	2.83006e+06	103008		1.05274e+06	1.41163e+06	2.63524e+06	2.35998e+06	222541	154437
FALSE		High	Unambiguous	QISDGEREELNLTANR	[R].QISDGEREELNLTANR.[L]			0.00124564	0.0010893	1.111	1	2	42	O95816	O95816 [71-86]			BAG family molecular chaperone regulator 2 [OS=Homo sapiens]	O95816-2; O95816	1	1844.91	16	FALSE	0.439	-1.19	0.00021439	0.00360968	4.99695e+06	2.19473e+06	11.31	24.67	6	6	2.86359e+06	1.59549e+06	1.92399e+06	1.74084e+06	1.99951e+06	2.29818e+06	2386375	2.52881e+06	1.99583e+06	2.27259e+06	960009	1.58996e+06	6.14313e+06	5.55791e+06	5.20699e+06	4.76109e+06
FALSE		High	Unambiguous	QISNLQQSISDAEQR	[K].QISNLQQSISDAEQR.[G]			1.98933e-06	0.0010893	2.245	1	1	7	KRT1	KRT1 [418-432]			Keratin, type II cytoskeletal 1 OS=Homo sapiens GN=KRT1 PE=1 SV=6	KRT1	0	1716.85	15	TRUE	0.01	-6.64			904850		37.96		6		368561	197950	571363	603223	375141	453456							790657	689557	1.54631e+06	1.64978e+06
FALSE		High	Unambiguous	QISNLQQSISDAEQRGENALK	[K].QISNLQQSISDAEQRGENALK.[D]			0.00197154	0.0010893	1.03	1	1	1	KRT1	KRT1 [418-438]			Keratin, type II cytoskeletal 1 OS=Homo sapiens GN=KRT1 PE=1 SV=6	KRT1	1	2329.17	21	TRUE
FALSE		High	Unambiguous	QISNLQQSISDAEQRGENALKDAK	[K].QISNLQQSISDAEQRGENALKDAK.[N]			0.00409344	0.0010893	0.901	1	1	23	KRT1	KRT1 [418-441]			Keratin, type II cytoskeletal 1 OS=Homo sapiens GN=KRT1 PE=1 SV=6	KRT1	2	2643.33	24	TRUE	0.01	-6.64			687165		52.17		6		309126	337890	118398	118951	500439	341247							663153	1.17704e+06	320427	325324
FALSE		High	Unambiguous	QISRPSAAGINLMIGSTR	[R].QISRPSAAGINLMIGSTR.[Y]			0.0219139	0.00194901	0.604	1	2	5	Q08211	Q08211 [1137-1154]			Atp-dependent rna helicase a [OS=Homo sapiens]	Q08211; Q08211-2	0	1872.01	18	FALSE	10.533	3.4	2.40582e-05	0.00077708	55794.7	587694	41.83	50.94	6	6	25528.6	11448.1	21003.7	17115.5	47437.6	45005.9	618111	527860	287542	269797	666117	927405	54765.3	39879.5	56843.4	46809.9
FALSE		High	Unambiguous	QPQVAELLAEAR	[R].QPQVAELLAEAR.[R]			0.000273737	0.0010893	1.378	1	2	5	P51570	P51570 [6-17]			galactokinase [OS=Homo sapiens]	P51570; P51570-2	0	1324.72	12	FALSE
FALSE		High	Unambiguous	QPYAVSELAGHQTSAESWGTGR	[R].QPYAVSELAGHQTSAESWGTGR.[A]			0.00116369	0.0010893	1.123	1	1	3	P36578	P36578 [50-71]			60S ribosomal protein L4 [OS=Homo sapiens]	P36578	0	2332.1	22	FALSE	0.01	-6.64			212888		28.23		6		88664.5	94741.6	100817	55974.7	82792.9	113732							190208	330032	272846	153087
FALSE		High	Unambiguous	QQELDNLLHEK	[R].QQELDNLLHEK.[R]			0.0213048	0.00194901	0.609	1	1	22	Q12788	Q12788 [654-664]			Transducin beta-like protein 3 [OS=Homo sapiens]	Q12788	0	1366.7	11	FALSE	0.598	-0.74	0.014105	0.0799284	999038	597706	19.79	36.7	6	6	486981	274257	492382	425014	343325	405826	806579	843586	353830	362027	418415	591644	1.0447e+06	955374	1.33256e+06	1.16239e+06
FALSE		High	Unambiguous	QQELDNLLHEKR	[R].QQELDNLLHEKR.[Y]			0.0856652	0.00584769	0.359	1	1	11	Q12788	Q12788 [654-665]			Transducin beta-like protein 3 [OS=Homo sapiens]	Q12788	1	1522.8	12	FALSE	0.01	-6.64			632555		60.03		6		466020	168677	68220.9	53409.8	346356	326350							999731	587588	184630	146073
FALSE		High	Unambiguous	QQFYHSVQDLSGGSR	[R].QQFYHSVQDLSGGSR.[Q]			0.00425885	0.0010893	0.894	1	2	7	P10398-1	P10398-1 [152-166]			serine/threonine-protein kinase A-Raf [OS=Homo sapiens]	P10398-2; P10398-1	0	1708.8	15	FALSE	4.766	2.25	1.12056e-05	0.000452428	126974	605200	28.4	36.04	6	6	99411.4	51191	42077.7	41549.6	50760.8	65989.9	886456	1.03099e+06	537056	550905	329075	548928	213263	178324	113877	113635
FALSE		High	Unambiguous	QQSPGLGRPIWLQIAESAYR	[R].QQSPGLGRPIWLQIAESAYR.[F]			0.00788886	0.0010893	0.785	1	2	10	O75746	O75746 [310-329]			Calcium-binding mitochondrial carrier protein Aralar1 [OS=Homo sapiens]	O75746-2; O75746	0	2270.2	20	FALSE	0.01	-6.64			692714		24.19		6		366592	175158	218148	194013	416664	425269							786432	610164	590386	530613
FALSE		High	Unambiguous	QQTDIAVNWAGGLHHAK	[K].QQTDIAVNWAGGLHHAK.[K]			0.00771252	0.0010893	0.789	1	1	3	Q13547	Q13547 [127-143]			histone deacetylase 1 [OS=Homo sapiens]	Q13547	0	1845.94	17	FALSE
FALSE		High	Unambiguous	QQTDMAVNWAGGLHHAK	[R].QQTDMAVNWAGGLHHAK.[K]			7.89142e-05	0.0010893	1.597	1	2	65	Q92769	Q92769 [128-144]			Histone deacetylase 2 [OS=Homo sapiens]	Q92769; Q92769-3	0	1863.89	17	FALSE	0.365	-1.46	0.101507	0.268189	4.20464e+06	1.53275e+06	49.33	52.48	6	6	591039	376185	1.78803e+06	1.70171e+06	2.00473e+06	1.83222e+06	908292	861601	2.98109e+06	2610809	1.02441e+06	1.58914e+06	1.26793e+06	1.31044e+06	4.83906e+06	4.65406e+06
FALSE		High	Unambiguous	QRPSEIKDYSPYFK	[R].QRPSEIKDYSPYFK.[T]			0.130725	0.00860454	0.279	1	1	4	KRT16	KRT16 [156-169]			Keratin, type I cytoskeletal 16 OS=Homo sapiens GN=KRT16 PE=1 SV=4	KRT16	1	1757.89	14	TRUE	0.01	-6.64			209452		66.96		4		34022.5	36037			164963	167481							72986.9	125535
FALSE		High	Unambiguous	QSEQQRETLAQLQQEFQR	[R].QSEQQRETLAQLQQEFQR.[A]			0.000184994	0.0010893	1.447	1	1	25	O15212	O15212 [100-117]			Prefoldin subunit 6 [OS=Homo sapiens]	O15212	1	2247.11	18	FALSE	100	6.64				1.21422e+06		70.68		6							2.00786e+06	1.92036e+06	99499.5	336269	857219	1.19179e+06
FALSE		High	Unambiguous	QSLGHGQHGSGSGQSPSPSR	[R].QSLGHGQHGSGSGQSPSPSR.[G]			0.00816095	0.0010893	0.779	1	1	3	HRNR	HRNR [992-1011]; [1462-1481]; [1932-1951]; [2402-2421]			Hornerin OS=Homo sapiens GN=HRNR PE=1 SV=2	HRNR	0	1947.9	20	TRUE	1.133	0.18	0.592684	0.750733	90944.8	103032	11.41	23.41	2	2			36433.3	30670.7					82090.1	121768					98601.6	83882.5
FALSE		High	Unambiguous	QSRLEQEEQQR	[R].QSRLEQEEQQR.[L]			0.0290451	0.00194901	0.554	1	3	5	Q3ZCQ8	Q3ZCQ8 [315-325]			Mitochondrial import inner membrane translocase subunit TIM50 [OS=Homo sapiens]	Q3ZCQ8; Q3ZCQ8-3; Q3ZCQ8-2	1	1430.7	11	FALSE	0.01	-6.64			785707				1			225551												785707
FALSE		High	Unambiguous	QSVEADINGLRR	[R].QSVEADINGLRR.[V]			0.00281714	0.0010893	0.967	1	5	42	KRT10	KRT10 [246-257]			Keratin, type I cytoskeletal 10 OS=Homo sapiens GN=KRT10 PE=1 SV=6	KRT10; KRT15; P13646-3; P13646-2; P13646	1	1357.72	12	TRUE	0.431	-1.22	0.00489976	0.041648	1.93216e+07	8.32095e+06	31.28	29.68	6	6	1.15557e+07	6.63994e+06	4.24201e+06	4145963	8.27259e+06	9.37609e+06	11819157	12722100	7.08216e+06	7.60126e+06	5117022	7786001	2.47898e+07	2.31302e+07	1.14804e+07	1.1339e+07
FALSE		High	Unambiguous	QSVENDIHGLR	[R].QSVENDIHGLR.[K]			0.0219139	0.00194901	0.604	1	1	4	P05783	P05783 [176-186]			Keratin, type I cytoskeletal 18 [OS=Homo sapiens]	P05783	0	1267.64	11	FALSE
FALSE		High	Unambiguous	QTQIFTTYSDNQPGVLIQVYEGER	[K].QTQIFTTYSDNQPGVLIQVYEGER.[A]			2.98049e-09	0.0010893	3.39	2	3	34	P0DMV8; P34931	P0DMV8 [424-447]; P34931 [426-449]			heat shock 70 kDa protein 1A [OS=Homo sapiens] Heat shock 70 kDa protein 1-like [OS=Homo sapiens]	P0DMV8-2; P0DMV8; P34931	0	2786.36	24	FALSE	100	6.64				1.41522e+07		20.97		6							14595101	16008208	10887136	13544662	8417136	15514122
FALSE		High	Unambiguous	QTQTFTTYSDNQPGVLIQVYEGER	[K].QTQTFTTYSDNQPGVLIQVYEGER.[A]			7.14782e-11	0.0010893	4.04678	1	2	51	P11142-1	P11142-1 [424-447]			Heat shock cognate 71 kDa protein [OS=Homo sapiens]	P11142-1; P11142-2	0	2774.33	24	FALSE	100	6.64				7.35751e+06		25.93		4							8508510	8964096			5.09063e+06	4.53086e+06
FALSE		High	Unambiguous	QVTITGSAASISLAQYLINAR	[R].QVTITGSAASISLAQYLINAR.[L]			0.00010306	0.0010893	1.55	1	1	4	Q15365	Q15365 [326-346]			Poly(RC)-binding protein 1 [OS=Homo sapiens]	Q15365	0	2177.19	21	FALSE	100	6.64				1.90437e+06		23.89		6							2.08931e+06	2.72835e+06	1.39187e+06	1.98215e+06	1.37279e+06	1.56394e+06
FALSE		High	Unambiguous	QVVQGLLSETYLEAHR	[R].QVVQGLLSETYLEAHR.[I]			0.000407325	0.0010893	1.308	1	3	16	P33993-1	P33993-1 [287-302]			DNA replication licensing factor MCM7 [OS=Homo sapiens]	P33993-2; P33993-1; P33993-3	0	1842.97	16	FALSE	100	6.64				3.92586e+06		7.91		6							3.86559e+06	3766495	3253660	4019128	2.76071e+06	3.51827e+06
FALSE		High	Unambiguous	QYAGLDHELAFSR	[R].QYAGLDHELAFSR.[L]			0.0736016	0.00434873	0.387	1	3	3	Q99720	Q99720 [48-60]			sigma non-opioid intracellular receptor 1 [OS=Homo sapiens]	Q99720; Q99720-3; Q99720-4	0	1506.73	13	FALSE
FALSE		High	Unambiguous	RAAGVVLEMIR	[R].RAAGVVLEMIR.[E]			0.00149344	0.0010893	1.079	1	2	8	Q9Y230	Q9Y230 [54-64]			RuvB-like 2 [OS=Homo sapiens]	Q9Y230; Q9Y230-2	1	1214.7	11	FALSE	100	6.64				468413		22.22		3									470328	468413		274252
FALSE		High	Unambiguous	RAAVPELSAQPAGSPR	[R].RAAVPELSAQPAGSPR.[A]			0.000188173	0.0010893	1.444	1	1	6	A6NIX2	A6NIX2 [75-90]			Wilms tumor protein 1-interacting protein [OS=Homo sapiens]	A6NIX2	1	1606.87	16	FALSE
FALSE		High	Unambiguous	RAFREEFGAEPELAVSAPGR	[R].RAFREEFGAEPELAVSAPGR.[V]			0.000832718	0.0010893	1.182	1	2	21	P51570	P51570 [18-37]			galactokinase [OS=Homo sapiens]	P51570; P51570-2	2	2189.11	20	FALSE	0.01	-6.64			256334		50.54		6		189142	59977.7	50992.5	39895.1	183245	150719							405757	208932	138004	109111
FALSE		High	Unambiguous	RALSSQHQAR	[K].RALSSQHQAR.[I]			0.0700725	0.00434873	0.396	1	1	18	P11021	P11021 [297-306]			78 kDa glucose-regulated protein [OS=Homo sapiens]	P11021	1	1153.62	10	FALSE	1.081	0.11	0.9516	0.972272	121258	131024	81	88.2	6	4	16365.1	59090	134902	130303	30142.3	34233.7			316360	341733	32265	43677.3	35107.2	205840	365094	356372
FALSE		High	Unambiguous	RAPDQAAEIGSR	[R].RAPDQAAEIGSR.[G]			1.9962e-05	0.0010893	1.839	1	2	26	Q3ZCQ8	Q3ZCQ8 [32-43]			Mitochondrial import inner membrane translocase subunit TIM50 [OS=Homo sapiens]	Q3ZCQ8; Q3ZCQ8-2	1	1270.65	12	FALSE	0.938	-0.09	0.672273	0.81024	1.22576e+06	1.15023e+06	60.9	56.59	6	6	631183	202472	1.07618e+06	1.06837e+06	389263	531787	984042	1.27009e+06	2.30243e+06	2.30727e+06	432413	705090	1.35405e+06	705310	2.91252e+06	2.92194e+06
FALSE		High	Unambiguous	RAPFDLFENR	[R].RAPFDLFENR.[K]			0.000992821	0.0010893	1.151	1	2	50	P07900	P07900 [346-355]			Heat shock protein HSP 90-alpha [OS=Homo sapiens]	P07900-2; P07900	1	1264.64	10	FALSE	0.997	0	0.737619	0.869529	4.05751e+06	4.04416e+06	16.81	28.27	6	6	1.56674e+06	944351	1.81377e+06	1.75552e+06	1.74405e+06	1.96127e+06	3490277	6.09218e+06	4.18245e+06	5.1071e+06	2430968	3.14748e+06	3.36105e+06	3.28965e+06	4.9087e+06	4.80124e+06
FALSE		High	Unambiguous	RDEDALHLVLR	[R].RDEDALHLVLR.[R]			0.0173906	0.0010893	0.645	1	2	32	Q9UQ49	Q9UQ49 [49-59]			Sialidase-3 [OS=Homo sapiens]	Q9UQ49; Q9UQ49-2	1	1336.73	11	FALSE	0.01	-6.64			78347.9		29.91		4		37149.8		48137.8		33391.5	35116.3							79695.8		130278
FALSE		High	Unambiguous	RDGADIHSDLFISIAQALLGGTAR	[R].RDGADIHSDLFISIAQALLGGTAR.[A]			0.110052	0.0064943	0.312	1	3	3	Q96EY1-1	Q96EY1-1 [341-364]			DnaJ homolog subfamily A member 3, mitochondrial [OS=Homo sapiens]	Q96EY1-1; Q96EY1-2; Q96EY1-3	1	2497.32	24	FALSE	0.01	-6.64			205764		24.54		6		94010.1	82613	56707.3	77746	91012.9	72789.2							201675	287782	153470	212631
FALSE		High	Unambiguous	RFDDAVVQSDMK	[R].RFDDAVVQSDMK.[H]			0.0250877	0.00194901	0.58	1	2	9	P11142-1	P11142-1 [77-88]			Heat shock cognate 71 kDa protein [OS=Homo sapiens]	P11142-1; P11142-2	1	1410.67	12	FALSE	0.01	-6.64			390811		41.02		4				207989	198186	106663	135043									562892	542026
FALSE		High	Unambiguous	RFDEILEASDGIMVAR	[R].RFDEILEASDGIMVAR.[G]			3.34717e-05	0.0010893	1.748	1	3	23	P14618	P14618 [279-294]			Pyruvate kinase PKM [OS=Homo sapiens]	P14618-2; P14618-3; P14618	1	1821.92	16	FALSE	100	6.64				2.289e+06		51.3		6							262912	965269	2.18645e+06	2.3982e+06	1.82924e+06	1.99606e+06
FALSE		High	Unambiguous	RFQGSTLPAEAANR	[R].RFQGSTLPAEAANR.[H]			0.00092749	0.0010893	1.163	1	3	2	Q96Q05	Q96Q05 [270-283]			Trafficking protein particle complex subunit 9 [OS=Homo sapiens]	Q96Q05-2; Q96Q05; Q96Q05-3	1	1517.78	14	FALSE	0.01	-6.64			90167.6		86.85		6		25040.9	22806	141293	135120	36117.1	46769.6							53719.1	79444.7	382389	369546
FALSE		High	Unambiguous	RFVTPSEPVAHSR	[R].RFVTPSEPVAHSR.[R]			0.000469434	0.0010893	1.283	1	1	9	O14654	O14654 [398-410]			insulin receptor substrate 4 [OS=Homo sapiens]	O14654	1	1482.78	13	FALSE	100	6.64				224506		67.99		5							406681	543488	211403	97922.3		122890
FALSE		High	Unambiguous	RHPEYAVSVLLR	[R].RHPEYAVSVLLR.[L]			0.000220606	0.0010893	1.416	1	1	124	ALB	ALB [360-371]			Serum albumin OS=Bos taurus GN=ALB PE=1 SV=4	ALB	1	1439.81	12	TRUE	0.01	-6.64			215873		33.46		6		82721.8	86454.4	48587.8	59572.1	130355	125852							177459	301164	131496	162926
FALSE		High	Unambiguous	RLAIQLGAQALLGAAK	[R].RLAIQLGAQALLGAAK.[M]			0.0865931	0.00584769	0.357	1	1	1	Q96C36	Q96C36 [200-215]			Pyrroline-5-carboxylate reductase 2 [OS=Homo sapiens]	Q96C36	1	1593.98	16	FALSE
FALSE		High	Unambiguous	RLDDQESPVYAAQQR	[R].RLDDQESPVYAAQQR.[R]			3.28662e-07	0.0010893	2.562	1	1	91	Q96ST3	Q96ST3 [4-18]			Paired amphipathic helix protein Sin3a [OS=Homo sapiens]	Q96ST3	1	1775.87	15	FALSE	0.588	-0.77	0.0057064	0.043885	4.72872e+07	2.78141e+07	27.78	29.73	6	6	2.74e+07	2.1716e+07	1.44971e+07	1.41176e+07	1.90068e+07	2.4443e+07	32860624	41053528	23501262	24567102	14519613	26495782	5.87799e+07	7.56477e+07	3.92342e+07	3.86108e+07
FALSE		High	Unambiguous	RLEAFEHPNVVR	[R].RLEAFEHPNVVR.[L]			0.00438108	0.0010893	0.889	1	1	1	P11802	P11802 [62-73]			Cyclin-dependent kinase 4 [OS=Homo sapiens]	P11802	1	1466.79	12	FALSE	0.01	-6.64			353893		19.09		6		162632	103049	96513.2	101787	190599	179638							348887	358972	261199	278382
FALSE		High	Unambiguous	RLEEDRHSIDITSELWNDELQSR	[R].RLEEDRHSIDITSELWNDELQSR.[K]			0.0131898	0.0010893	0.694	1	2	2	Q5PSV4	Q5PSV4 [167-189]			Breast cancer metastasis-suppressor 1-like protein [OS=Homo sapiens]	Q5PSV4-2; Q5PSV4	2	2841.38	23	FALSE
FALSE		High	Unambiguous	RLEESDVLQEAR	[R].RLEESDVLQEAR.[R]			0.00170142	0.0010893	1.056	1	1	5	O43615	O43615 [90-101]			Mitochondrial import inner membrane translocase subunit TIM44 [OS=Homo sapiens]	O43615	1	1444.74	12	FALSE	0.918	-0.12	0.227372	0.445533	287420	263793	24.12	48.53	6	5	202289	114265	102186	87151.8	127603	134509	322807	347410	79582.8		128852	225485	433961	398041	276553	238355
FALSE		High	Unambiguous	RLLSRPQDALEGVVLSPSLEAR	[R].RLLSRPQDALEGVVLSPSLEAR.[V]			0.121568	0.00860454	0.293	1	3	7	Q9NVI7	Q9NVI7 [354-375]			ATPase family AAA domain-containing protein 3A [OS=Homo sapiens]	Q9NVI7-3; Q9NVI7-2; Q9NVI7	1	2406.35	22	FALSE
FALSE		High	Unambiguous	RLNVWDLSK	[R].RLNVWDLSK.[I]			6.11156e-05	0.0010893	1.642	1	6	48	Q16576-1	Q16576-1 [340-348]			Histone-binding protein RBBP7 [OS=Homo sapiens]	Q16576-1; Q09028-2; Q09028-3; Q09028-4; Q09028; Q16576-2	1	1130.63	9	FALSE	25.375	4.67	7.1763e-05	0.00165568	522018	1.32462e+07	47.82	52.89	6	6	379944	121610	90788.1	84170.6	288382	308281	1.95596e+07	1.30934e+07	7.37155e+06	1.7628e+06	1.17405e+07	1.09633e+07	815075	423627	245705	230201
FALSE		High	Unambiguous	RIPGSTEAFPHQHR	[R].RIPGSTEAFPHQHR.[V]			7.19714e-07	0.0010893	2.424	1	1	277	Q96ST3	Q96ST3 [19-32]			Paired amphipathic helix protein Sin3a [OS=Homo sapiens]	Q96ST3	1	1632.84	14	FALSE	2.163	1.11	0.0284461	0.131258	1.27808e+07	2.76497e+07	57.79	41.7	6	6	5.25041e+06	4.1632e+06	1.68853e+06	2.00825e+06	1.00161e+07	9.95009e+06	3.54936e+07	4.53159e+07	2.03789e+07	2.40519e+07	1.04956e+07	2.71698e+07	1.12634e+07	1.45025e+07	4.56976e+06	5.49244e+06
FALSE		High	Unambiguous	RISEQFTAMFR	[K].RISEQFTAMFR.[R]			0.00692711	0.0010893	0.808	4	7	39	Q13509; P04350; P07437; Q9BVA1	Q13509 [380-390]; P04350 [380-390]; P07437 [380-390]; Q9BVA1 [380-390]			tubulin beta-3 chain [OS=Homo sapiens] Tubulin beta-4A chain [OS=Homo sapiens] tubulin beta chain [OS=Homo sapiens] Tubulin beta-2B chain [OS=Homo sapiens]	Q13885; Q13509; P04350; Q13509-2; P07437; P68371; Q9BVA1	1	1385.7	11	FALSE	0.01	-6.64			1.28598e+06		7.47		2				500976	445985											1.35582e+06	1.21974e+06
FALSE		High	Unambiguous	RLSQLSSHDPLWR	[R].RLSQLSSHDPLWR.[R]			1.43914e-06	0.0010893	2.302	1	3	65	Q9UK99	Q9UK99 [42-54]			F-box only protein 3 [OS=Homo sapiens]	Q9UK99-3; Q9UK99; Q9UK99-2	1	1594.84	13	FALSE	0.837	-0.26	0.267358	0.487891	1.10749e+07	9.27449e+06	18.52	45.8	6	6	6.49589e+06	2.44369e+06	4.10439e+06	3.7374e+06	6.01605e+06	5291816	8778996	9255891	12854043	13196473	1.77887e+06	6.35621e+06	1.39353e+07	8.51261e+06	1.1108e+07	1.02216e+07
FALSE		High	Unambiguous	RLSQLSSHDPLWRR	[R].RLSQLSSHDPLWRR.[H]			0.00273848	0.0010893	0.972	1	3	53	Q9UK99	Q9UK99 [42-55]			F-box only protein 3 [OS=Homo sapiens]	Q9UK99-3; Q9UK99; Q9UK99-2	2	1750.95	14	FALSE	0.01	-6.64			523664		68.2		6		243198	189969	37954	29300.6	380829	251899							521721	661758	102717	80135.4
FALSE		High	Unambiguous	RNDSVIVDTFHGLFK	[R].RNDSVIVDTFHGLFK.[S]			1.01196e-06	0.0010893	2.364	1	1	88	P51784	P51784 [449-463]			Ubiquitin carboxyl-terminal hydrolase 11 [OS=Homo sapiens]	P51784	1	1747.91	15	FALSE	100	6.64				8.93909e+06		26.24		6							7.86211e+06	5.11798e+06	7.9806e+06	9.4283e+06	9285898	1.00243e+07
FALSE		High	Unambiguous	RNLDIERPTYTNLNR	[R].RNLDIERPTYTNLNR.[L]			1.24585e-05	0.0010893	1.922	3	11	177	Q13748-1; P68363; Q9BQE3	Q13748-1 [215-229]; P68363 [215-229]; Q9BQE3 [215-229]			tubulin alpha-3C/D chain [OS=Homo sapiens] Tubulin alpha-1B chain [OS=Homo sapiens] Tubulin alpha-1C chain [OS=Homo sapiens]	Q13748-1; Q6PEY2; Q13748-2; Q71U36; Q9NY65; P68366-2; P68363; Q71U36-2; Q9BQE3; Q9NY65-2; P68366	1	1874.98	15	FALSE	0.598	-0.74	0.00665572	0.048859	2.28299e+07	1.3641e+07	22.66	14.76	6	6	1.11551e+07	6410136	5.97873e+06	5.41454e+06	1.18399e+07	1.11863e+07	1.3742e+07	15386016	1.15255e+07	1.33651e+07	9.13885e+06	1.4032e+07	2.39305e+07	2.23297e+07	1.61806e+07	1.48084e+07
FALSE		High	Unambiguous	RPAMLDNEADGNK	[K].RPAMLDNEADGNK.[T]			0.0151884	0.0010893	0.669	1	2	4	Q93009	Q93009 [634-646]			Ubiquitin carboxyl-terminal hydrolase 7 [OS=Homo sapiens]	Q93009; Q93009-3	0	1430.67	13	FALSE	0.01	-6.64			123805		84.71		4				105044	114295	16901.8	25839.3									284285	312590
FALSE		High	Unambiguous	RPDGFDGLGYR	[R].RPDGFDGLGYR.[G]			0.000257162	0.0010893	1.389	1	2	16	Q96AG3	Q96AG3 [5-15]			Solute carrier family 25 member 46 [OS=Homo sapiens]	Q96AG3; Q96AG3-3	0	1252.61	11	FALSE	1.301	0.38	0.0986103	0.265032	500150	650510	55.66	15.97	6	6	234597	166412	69487.5	17283	215484	242104	631669	759165	622625	607446	431383	690065	503269	579697	188058	47267.9
FALSE		High	Unambiguous	RPGHDDGQRPSGGAAAAPR	[R].RPGHDDGQRPSGGAAAAPR.[R]			0.00205132	0.0010893	1.023	1	2	8	Q8N726	Q8N726 [63-81]			Tumor suppressor ARF [OS=Homo sapiens]	Q8N726-2; Q8N726	0	1872.92	19	FALSE	0.01	-6.64			37832.7		120.17		4			69485.6		20174.1	11246.3	11684.1								242053		55174.8
FALSE		High	Unambiguous	RPLDEAVAGAEGR	[R].RPLDEAVAGAEGR.[E]			0.00688806	0.0010893	0.809	1	1	6	Q8IWF6	Q8IWF6 [15-27]			Protein DENND6A [OS=Homo sapiens]	Q8IWF6	0	1340.69	13	FALSE
FALSE		High	Unambiguous	RPPMTQVYER	[R].RPPMTQVYER.[L]			0.000592433	0.0010893	1.242	1	1	2	P51617	P51617 [508-517]			interleukin-1 receptor-associated kinase 1 [OS=Homo sapiens]	P51617	0	1276.65	10	FALSE
FALSE		High	Unambiguous	RPQIDPAVEGFIR	[R].RPQIDPAVEGFIR.[D]			0.00466244	0.0010893	0.878	1	3	2	Q8WU79-1	Q8WU79-1 [103-115]			Stromal membrane-associated protein 2 [OS=Homo sapiens]	Q8WU79-1; Q8WU79-3; Q8WU79-2	0	1497.82	13	FALSE
FALSE		High	Unambiguous	RPVGGFLLDGFQGNPTTLEAR	[K].RPVGGFLLDGFQGNPTTLEAR.[L]			8.49617e-05	0.0010893	1.584	1	4	3	Q9H974-1	Q9H974-1 [212-232]			Queuine tRNA-ribosyltransferase accessory subunit 2 [OS=Homo sapiens]	Q9H974-3; Q9H974-1; Q9H974-4; Q9H974-2	0	2245.17	21	FALSE
FALSE		High	Unambiguous	RPVQAWVESLR	[R].RPVQAWVESLR.[G]			0.00310183	0.0010893	0.95	1	2	1	Q9BYD3	Q9BYD3 [60-70]			39S ribosomal protein L4, mitochondrial [OS=Homo sapiens]	Q9BYD3; Q9BYD3-2	0	1340.74	11	FALSE
FALSE		High	Unambiguous	RQAVTNPNNTFYATK	[K].RQAVTNPNNTFYATK.[R]			1.41167e-05	0.0010893	1.9	1	1	28	P38646	P38646 [107-121]			Stress-70 protein, mitochondrial [OS=Homo sapiens]	P38646	1	1724.87	15	FALSE	0.01	-6.64			3.4295e+06		32.86		6		1.4126e+06	1.11416e+06	1756979	1.6458e+06	896584	1.11466e+06							3.03039e+06	3.88118e+06	4.75501e+06	4.50115e+06
FALSE		High	Unambiguous	RQWLQEAMSAAFR	[R].RQWLQEAMSAAFR.[G]			0.00035544	0.0010893	1.332	1	3	45	Q9NZL4-1	Q9NZL4-1 [75-87]			Hsp70-binding protein 1 [OS=Homo sapiens]	Q9NZL4-3; Q9NZL4-1; Q9NZL4-2	1	1593.8	13	FALSE	0.01	-6.64			502323		37.02		6		116131	61649.7	182839	186451	247423	275068							249130	214757	494827	509932
FALSE		High	Unambiguous	RRDELSEEINNLR	[R].RRDELSEEINNLR.[E]			0.000842221	0.0010893	1.18	1	2	18	Q86TG7-1	Q86TG7-1 [5-17]			Retrotransposon-derived protein PEG10 [OS=Homo sapiens]	Q86TG7-1; Q86TG7-2	2	1643.85	13	FALSE	4.284	2.1	4.5257e-06	0.000247762	233851	1.00174e+06	17.93	30.09	4	6	98544.6	74259.2	65002.1			124637	989388	1.39255e+06	1.63563e+06	822229	811537	838417	211403	258682	175919
FALSE		High	Unambiguous	RRNDSVIVDTFHGLFK	[K].RRNDSVIVDTFHGLFK.[S]			0.000291381	0.0010893	1.367	1	1	82	P51784	P51784 [448-463]			Ubiquitin carboxyl-terminal hydrolase 11 [OS=Homo sapiens]	P51784	2	1904.01	16	FALSE	0.476	-1.07	0.017946	0.093493	574809	273521	22.24	55.12	6	5	229091	192228	169233	192903	352778	300138	296218	261786	100533	80771.8	292416		491457	669626	458004	527578
FALSE		High	Unambiguous	RSLEQNIQLPAALLSR	[R].RSLEQNIQLPAALLSR.[F]			0.00647273	0.0010893	0.82	1	2	12	P33993-1	P33993-1 [499-514]			DNA replication licensing factor MCM7 [OS=Homo sapiens]	P33993-1; P33993-3	1	1809.03	16	FALSE	0.01	-6.64			128663		36.42		6		61276.6	37383.2	24424.7	22214.7	71906.5	60922.1							131454	130224	66102	60755.9
FALSE		High	Unambiguous	RTDDIPVWDQEFLK	[K].RTDDIPVWDQEFLK.[V]			1.02706e-05	0.0010893	1.956	1	2	31	P63208	P63208 [81-94]			s-phase kinase-associated protein 1 [OS=Homo sapiens]	P63208-2; P63208	1	1761.88	14	FALSE	0.01	-6.64			1.24656e+06		50.29		6		612489	335202	1.06272e+06	1.07416e+06	512706	532035							1.31394e+06	1.16768e+06	2.8761e+06	2.93776e+06
FALSE		High	Unambiguous	RVATWFNQPAR	[R].RVATWFNQPAR.[K]			0.00151047	0.0010893	1.077	1	2	8	P26373-1	P26373-1 [21-31]			60S ribosomal protein L13 [OS=Homo sapiens]	P26373-2; P26373-1	1	1345.71	11	FALSE	2.258	1.18	0.110858	0.277576	317256	716476	43.07	51.24	6	6	296858	179185	128174	106093	114367	134545	1.01944e+06	1179313	634563	761746	219036	317594	636836	624191	346886	290158
FALSE		High	Unambiguous	RVFDVPIRR	[R].RVFDVPIRR.[R]			0.0481249	0.00272876	0.464	1	1	19	Q9UK99	Q9UK99 [456-464]			F-box only protein 3 [OS=Homo sapiens]	Q9UK99	2	1157.69	9	FALSE	0.999	0	0.825143	0.906535	2.99976e+06	2.99557e+06	28.8	19.82	6	4	1456054	1.06522e+06	721943	643961	1.55098e+06	1.38063e+06	3.09747e+06	3.27632e+06			1.69919e+06	2.44417e+06	3.1236e+06	3.7107e+06	1.95383e+06	1.76119e+06
FALSE		High	Unambiguous	RVPNSVLWLLR	[K].RVPNSVLWLLR.[F]			0.00647273	0.0010893	0.82	1	4	17	O15294	O15294 [867-877]			UDP-N-acetylglucosamine--peptide N-acetylglucosaminyltransferase 110 kDa subunit [OS=Homo sapiens]	O15294-4; O15294; O15294-2; O15294-3	1	1352.82	11	FALSE	100	6.64				368049		6.49		3								391706	343689	368049
FALSE		High	Unambiguous	RVQVYLHESTQDELAR	[R].RVQVYLHESTQDELAR.[K]			0.0938517	0.00584769	0.342	1	1	8	Q13616	Q13616 [274-289]			Cullin-1 [OS=Homo sapiens]	Q13616	1	1943.99	16	FALSE
FALSE		High	Unambiguous	RYDDPEVQK	[R].RYDDPEVQK.[D]			0.0119828	0.0010893	0.711	1	1	8	P38646	P38646 [127-135]			Stress-70 protein, mitochondrial [OS=Homo sapiens]	P38646	1	1149.55	9	FALSE	0.954	-0.07	0.650445	0.798707	398054	379841	92.95	91.35	5	3		114268	354852	362351	22673.5	34803.5			580645	379841	7412.81			398054	960355	991007
FALSE		High	Unambiguous	RYNIPHGPVVGSTR	[R].RYNIPHGPVVGSTR.[R]			0.000423837	0.0010893	1.301	1	1	33	P50402	P50402 [18-31]			Emerin [OS=Homo sapiens]	P50402	1	1552.83	14	FALSE	0.982	-0.03	0.917489	0.972272	368411	361814	36.56	14.13	6	3	272007	180890	112062	95699.8	178757	157753	355787	437762	340696				583524	630130	303279	261733
FALSE		High	Unambiguous	SAEQISDSVRR	[R].SAEQISDSVRR.[H]			0.0503174	0.00272876	0.456	1	1	3	O43819	O43819 [246-256]			Protein SCO2 homolog, mitochondrial [OS=Homo sapiens]	O43819	1	1247.63	11	FALSE
FALSE		High	Unambiguous	SAMSVQSSLVMHPIYAYGSEEQR	[R].SAMSVQSSLVMHPIYAYGSEEQR.[Q]			8.2115e-05	0.0010893	1.59	1	2	3	Q92947-1	Q92947-1 [139-161]			Glutaryl-CoA dehydrogenase, mitochondrial [OS=Homo sapiens]	Q92947-1; Q92947-2	0	2570.2	23	FALSE
FALSE		High	Unambiguous	SAPAQAPTSGADLSAHLWAR	[R].SAPAQAPTSGADLSAHLWAR.[Y]			0.0772958	0.00514875	0.378	1	2	9	Q9H857-2	Q9H857-2 [49-68]			Isoform 2 of 5'-nucleotidase domain-containing protein 2 [OS=Homo sapiens]	Q9H857-3; Q9H857-2	0	2007	20	FALSE	0.01	-6.64			761145		28.32		6		450686	244971	195760	162900	295495	407343							966835	853357	529797	445523
FALSE		High	Unambiguous	SAPSSEPHLIFVYEDR	[R].SAPSSEPHLIFVYEDR.[Q]			0.00780019	0.0010893	0.787	1	2	14	O75182-1	O75182-1 [644-659]			paired amphipathic helix protein sin3b [OS=Homo sapiens]	O75182-2; O75182-1	0	1846.9	16	FALSE	0.01	-6.64			1.33693e+06		27.08		6		719416	401375	333904	289352	704167	612645							1.54333e+06	1.39819e+06	903664	791360
FALSE		High	Unambiguous	SDIGEVILVGGMTR	[K].SDIGEVILVGGMTR.[M]			2.12232e-07	0.0010893	2.639	1	1	28	P38646	P38646 [378-391]			Stress-70 protein, mitochondrial [OS=Homo sapiens]	P38646	0	1446.76	14	FALSE	100	6.64				197826		71.86		4							126606	96346.5		504114	247330
FALSE		High	Unambiguous	SDLLLSGRDWNTLIVGK	[R].SDLLLSGRDWNTLIVGK.[L]			0.0340032	0.00194901	0.526	1	3	14	O14744	O14744 [69-85]			Protein arginine N-methyltransferase 5 [OS=Homo sapiens]	O14744-4; O14744; O14744-2	1	1887.03	17	FALSE
FALSE		High	Unambiguous	SDPRPGPGPPSVGSAR	[R].SDPRPGPGPPSVGSAR.[S]			0.00741332	0.0010893	0.796	1	1	8	A6NIX2	A6NIX2 [126-141]			Wilms tumor protein 1-interacting protein [OS=Homo sapiens]	A6NIX2	0	1533.78	16	FALSE	1.073	0.1	0.390305	0.614532	275512	295721	67.57	97.17	5	6		79090.7	164542	155987	29448.7	46460.6	218814	377547	1.15849e+06	1.24844e+06	69538.9	129858		275512	445309	426615
FALSE		High	Unambiguous	SDQSRLDSELK	[K].SDQSRLDSELK.[N]			0.0182962	0.0010893	0.636	1	1	12	KRT1	KRT1 [247-257]			Keratin, type II cytoskeletal 1 OS=Homo sapiens GN=KRT1 PE=1 SV=6	KRT1	1	1277.63	11	TRUE	0.01	-6.64			477854		21.33		2		191343	159692											410478	556288
FALSE		High	Unambiguous	SEDLLDVDTAAGGFQQR	[R].SEDLLDVDTAAGGFQQR.[Q]			2.5326e-10	0.0010893	3.82406	1	3	31	Q9UK99	Q9UK99 [171-187]			F-box only protein 3 [OS=Homo sapiens]	Q9UK99-3; Q9UK99; Q9UK99-2	0	1821.86	17	FALSE	2.407	1.27	6.02038e-05	0.00150916	1.59057e+06	3.82905e+06	14.59	19.69	6	6	849195	391683	527432	503412	768373	882946	3.99513e+06	3.86828e+06	3.41459e+06	3.62762e+06	3488021	1956669	1.82174e+06	1.36443e+06	1.42742e+06	1.3768e+06
FALSE		High	Unambiguous	SELHIENLNMEADPGQYR	[R].SELHIENLNMEADPGQYR.[C]			0.000130826	0.0010893	1.508	1	4	5	P35613	P35613 [283-300]			Basigin [OS=Homo sapiens]	P35613-4; P35613-2; P35613-3; P35613	0	2115.98	18	FALSE	0.01	-6.64			245402		52.51		6		112880	62312.9	84238.3	90931.8	114366	302016							242155	217067	227979	248693
FALSE		High	Unambiguous	SESHTDLTFSR	[R].SESHTDLTFSR.[E]			0.120308	0.00860454	0.295	1	2	1	O15226	O15226 [616-626]			NF-kappa-B-repressing factor [OS=Homo sapiens]	O15226; O15226-2	0	1279.59	11	FALSE	0.01	-6.64			28892.5		94.71		4		27748.7	27302.2	5181.6			3107.85							59528	95107.4	14023.3
FALSE		High	Unambiguous	SESPQPAPDWGSQRPFHR	[R].SESPQPAPDWGSQRPFHR.[F]			0.0943548	0.00584769	0.341	1	4	7	O00165	O00165 [151-168]			HCLS1-associated protein X-1 [OS=Homo sapiens]	O00165-3; O00165; O00165-5; O00165-2	0	2078.98	18	FALSE	0.76	-0.4	0.1869	0.394567	221022	167956	15.22	59.93	6	5	118577	68607.1	66462.6	62723.3	95042.8	106789	165776	287398	55711.7		70001.2	146418	254377	238993	179872	171544
FALSE		High	Unambiguous	SEVAAGGGSWDDRLR	[R].SEVAAGGGSWDDRLR.[R]			0.0772958	0.00514875	0.378	1	2	4	Q66K74	Q66K74 [313-327]			Microtubule-associated protein 1S [OS=Homo sapiens]	Q66K74-2; Q66K74	1	1575.75	15	FALSE	0.01	-6.64			154707		23.11		6		72711.5	55586.1	42043.1	36916.4	70203.8	73535.6							155985	193634	113784	100964
FALSE		High	Unambiguous	SEWGSLLEELVAEGK	[R].SEWGSLLEELVAEGK.[I]			0.00150193	0.0010893	1.078	1	2	2	P17858-1	P17858-1 [130-144]			ATP-dependent 6-phosphofructokinase, liver type [OS=Homo sapiens]	P17858-1; P17858-2	0	1646.83	15	FALSE
FALSE		High	Unambiguous	SFYPEEVSSMVLTK	[K].SFYPEEVSSMVLTK.[M]			9.11577e-06	0.0010893	1.977	1	2	29	P11142-1	P11142-1 [113-126]			Heat shock cognate 71 kDa protein [OS=Homo sapiens]	P11142-1; P11142-2	0	1616.79	14	FALSE	1.902	0.93	0.0701007	0.21983	1.57047e+06	2.98653e+06	36.15	54.76	6	6	415859	209650	608051	548010	868146	899286	1.13906e+06	1.2664e+06	3.9789e+06	4558386	3.70681e+06	1.8043e+06	892123	730316	1.6456e+06	1.49877e+06
FALSE		High	Unambiguous	SGPFGQIFRPDNFVFGQSGAGNNWAK	[R].SGPFGQIFRPDNFVFGQSGAGNNWAK.[G]			4.62119e-07	0.0010893	2.502	3	5	20	P04350; P07437; Q9BVA1	P04350 [78-103]; P07437 [78-103]; Q9BVA1 [78-103]			Tubulin beta-4A chain [OS=Homo sapiens] tubulin beta chain [OS=Homo sapiens] Tubulin beta-2B chain [OS=Homo sapiens]	Q13885; P04350; P07437; P68371; Q9BVA1	0	2798.34	26	FALSE	0.01	-6.64			4.20732e+06		17.9		6		1.86971e+06	1.16263e+06	2.10582e+06	2.08762e+06	1.89482e+06	1.931e+06							4.011e+06	4.05003e+06	5.6991e+06	5.70952e+06
FALSE		High	Unambiguous	SKAEAESLYQSK	[K].SKAEAESLYQSK.[Y]			6.61738e-05	0.0010893	1.628	1	1	56	KRT1	KRT1 [365-376]			Keratin, type II cytoskeletal 1 OS=Homo sapiens GN=KRT1 PE=1 SV=6	KRT1	1	1340.67	12	TRUE	0.404	-1.31	0.277843	0.501359	1.90969e+06	771341	54.58	86.17	6	5	569936	784622	1.32278e+06	1.30577e+06	401327	639453		738250	2.94242e+06	2.77845e+06	260294	548168	1.22266e+06	2.73323e+06	3.57992e+06	3.5712e+06
FALSE		High	Unambiguous	SKAEAESLYQSKYEELQITAGR	[K].SKAEAESLYQSKYEELQITAGR.[H]			2.07717e-05	0.0010893	1.832	1	1	15	KRT1	KRT1 [365-386]			Keratin, type II cytoskeletal 1 OS=Homo sapiens GN=KRT1 PE=1 SV=6	KRT1	2	2501.25	22	TRUE	0.01	-6.64			300273		30.26		3		181181				90093.2	143905							388679
FALSE		High	Unambiguous	SKEEAEALYHSK	[R].SKEEAEALYHSK.[Y]			1.51124e-05	0.0010893	1.888	1	1	55	KRT2	KRT2 [363-374]			Keratin, type II cytoskeletal 2 epidermal OS=Homo sapiens GN=KRT2 PE=1 SV=2	KRT2	1	1391.68	12	TRUE	1.109	0.15			581867	645418	98.43		4	1			612545	872937	88540.1	93634.6				645418					1.65776e+06	2.38743e+06
FALSE		High	Unambiguous	SKELTTEIDNNIEQISSYK	[K].SKELTTEIDNNIEQISSYK.[S]			8.40876e-08	0.0010893	2.802	1	1	76	KRT10	KRT10 [344-362]			Keratin, type I cytoskeletal 10 OS=Homo sapiens GN=KRT10 PE=1 SV=6	KRT10	1	2212.1	19	TRUE	0.01	-6.64			2.10722e+06		38.51		6		750145	161543	946561	774314	1.04562e+06	1.00488e+06							1.60925e+06	562734	2.56173e+06	2.1177e+06
FALSE		High	Unambiguous	SLADIAREEASNFR	[R].SLADIAREEASNFR.[S]			0.0123957	0.0010893	0.705	1	2	15	P25788-1	P25788-1 [87-100]			Proteasome subunit alpha type-3 [OS=Homo sapiens]	P25788-2; P25788-1	1	1578.79	14	FALSE	0.946	-0.08	0.655286	0.798707	517961	490220	45.45	58.94	6	5	299874	119718	142383	117260	401452	447761	411504	469189	118777		778915	693682	643305	417039	385340	320698
FALSE		High	Unambiguous	SLDHQAVNFK	[K].SLDHQAVNFK.[Q]			0.013415	0.0010893	0.691	1	2	2	O75182-1	O75182-1 [603-612]			paired amphipathic helix protein sin3b [OS=Homo sapiens]	O75182-2; O75182-1	0	1158.59	10	FALSE
FALSE		High	Unambiguous	SLDHQGINFK	[K].SLDHQGINFK.[Q]			0.000233497	0.0010893	1.406	1	1	16	Q96ST3	Q96ST3 [728-737]			Paired amphipathic helix protein Sin3a [OS=Homo sapiens]	Q96ST3	0	1158.59	10	FALSE	100	6.64				823586		115.64		4							13934.7	29506.5	23266342	22001724
FALSE		High	Unambiguous	SLDLDSIIAEVKAQYEDIAQK	[R].SLDLDSIIAEVKAQYEDIAQK.[S]			3.12663e-05	0.0010893	1.76	1	1	4	KRT1	KRT1 [344-364]			Keratin, type II cytoskeletal 1 OS=Homo sapiens GN=KRT1 PE=1 SV=6	KRT1	1	2349.22	21	TRUE	0.01	-6.64			265462		36.62		4		134411	126495			83616.2	117126							288345	440645
FALSE		High	Unambiguous	SLEQNIQLPAALLSR	[R].SLEQNIQLPAALLSR.[F]			7.46329e-08	0.0010893	2.823	1	2	37	P33993-1	P33993-1 [500-514]			DNA replication licensing factor MCM7 [OS=Homo sapiens]	P33993-1; P33993-3	0	1652.93	15	FALSE	0.72	-0.47	0.0467822	0.178166	1.0664e+06	767649	23.57	7.06	6	6	582293	262025	288297	277074	540134	603274	841466	799179	700722	754795	575362	667346	1.24917e+06	912764	780233	757781
FALSE		High	Unambiguous	SIFYVPDMKPSMFDVSR	[R].SIFYVPDMKPSMFDVSR.[E]			0.111216	0.00726596	0.31	1	2	3	Q12931	Q12931 [341-357]			heat shock protein 75 kDa, mitochondrial [OS=Homo sapiens]	Q12931; Q12931-2	0	2018.97	17	FALSE
FALSE		High	Unambiguous	SLHDAIMIVR	[R].SLHDAIMIVR.[R]			0.0460245	0.00272876	0.472	1	4	4	Q99832	Q99832 [388-397]			T-complex protein 1 subunit eta [OS=Homo sapiens]	Q99832; Q99832-4; Q99832-3; Q99832-2	0	1154.64	10	FALSE	100	6.64				742988		23.33		6							714130	730246	428290	508642	643572	713387
FALSE		High	Unambiguous	SLHTEEAPALDAAR	[R].SLHTEEAPALDAAR.[A]			0.000179815	0.0010893	1.452	1	2	6	Q6DN90-1	Q6DN90-1 [262-275]			IQ motif and SEC7 domain-containing protein 1 [OS=Homo sapiens]	Q6DN90-1; Q6DN90-2	0	1480.74	14	FALSE
FALSE		High	Unambiguous	SLLDGNIDSSQYEDSLR	[R].SLLDGNIDSSQYEDSLR.[E]			0.00021443	0.0010893	1.421	1	1	12	Q96ST3	Q96ST3 [968-984]			Paired amphipathic helix protein Sin3a [OS=Homo sapiens]	Q96ST3	0	1911.89	17	FALSE	0.01	-6.64			57160.2		67.95		6		24408.3	5638.15	59437.5	48502.5	26735.4	25390.8							52362	19640.5	160859	132651
FALSE		High	Unambiguous	SLLGLDSGELQSGPESSSSPGVHVR	[R].SLLGLDSGELQSGPESSSSPGVHVR.[Q]			0.0400171	0.00272876	0.497	1	7	1	P49815	P49815 [1079-1103]			Tuberin [OS=Homo sapiens]	P49815-5; P49815-7; P49815-4; P49815; P49815-3; P49815-2; P49815-6	0	2495.24	25	FALSE
FALSE		High	Unambiguous	SLLHGDFHAFSAGPGLFSYIR	[R].SLLHGDFHAFSAGPGLFSYIR.[H]			3.85786e-05	0.0010893	1.723	1	4	10	P08195	P08195 [535-555]			4F2 cell-surface antigen heavy chain [OS=Homo sapiens]	P08195-3; P08195-2; P08195; P08195-4	0	2292.16	21	FALSE	0.01	-6.64			393420		34.94		6		242047	94263.9	84083.6	102658	247363	225898							519253	328368	227560	280763
FALSE		High	Unambiguous	SLLNEIESIYDER	[K].SLLNEIESIYDER.[Q]			3.02863e-06	0.0010893	2.171	1	1	8	Q96ST3	Q96ST3 [748-760]			Paired amphipathic helix protein Sin3a [OS=Homo sapiens]	Q96ST3	0	1580.78	13	FALSE	0.01	-6.64			957249		42.94		6		416154	291891	723039	704931	390687	393477							892756	1.0168e+06	1.9568e+06	1.92794e+06
FALSE		High	Unambiguous	SIISMFDRENK	[R].SIISMFDRENK.[A]			0.106061	0.0064943	0.319	1	2	2	O75340	O75340 [67-77]			programmed cell death protein 6 [OS=Homo sapiens]	O75340-2; O75340	1	1339.67	11	FALSE
FALSE		High	Unambiguous	SINHASLISALSR	[R].SINHASLISALSR.[D]			0.00133335	0.0010893	1.099	1	2	9	Q96QU8	Q96QU8 [748-760]			Exportin-6 [OS=Homo sapiens]	Q96QU8; Q96QU8-2	0	1368.76	13	FALSE	0.01	-6.64			72340.5		13.46		6		29977.3	21635.3	25656.6	24124.4	39677.2	36616.2							64308.8	75366.5	69435.9	65978.9
FALSE		High	Unambiguous	SLNNQFASFIDKVR	[K].SLNNQFASFIDKVR.[F]			0.0363758	0.00194901	0.514	1	1	1	KRT1	KRT1 [186-199]			Keratin, type II cytoskeletal 1 OS=Homo sapiens GN=KRT1 PE=1 SV=6	KRT1	1	1638.86	14	TRUE	0.01	-6.64			8.14824e+06		13.21		2						3.87948e+06	3.55575e+06
FALSE		High	Unambiguous	SLNRVHLLGR	[R].SLNRVHLLGR.[V]			0.0330602	0.00194901	0.531	1	1	2	Q04837	Q04837 [29-38]			Single-stranded DNA-binding protein, mitochondrial [OS=Homo sapiens]	Q04837	1	1164.7	10	FALSE	0.01	-6.64			170420		83.73		5			82696.8	7042.91	7870.46	91086.5	81673.4								288074	19060.6	21525.2
FALSE		High	Unambiguous	SIRPDNMSEYSK	[R].SIRPDNMSEYSK.[Q]			0.00212226	0.0010893	1.017	2	3	21	Q13547; Q92769	Q13547 [78-89]; Q92769 [79-90]			histone deacetylase 1 [OS=Homo sapiens] Histone deacetylase 2 [OS=Homo sapiens]	Q13547; Q92769; Q92769-3	0	1426.66	12	FALSE	0.492	-1.02	0.0112851	0.0700979	1.38706e+06	682074	31.97	36.65	6	6	533752	482342	708557	646184	352391	512966	498907	795732	1.00091e+06	1.05096e+06	453619	395798	1.14503e+06	1.68024e+06	1.91761e+06	1.76727e+06
FALSE		High	Unambiguous	SIRPGLSPYR	[R].SIRPGLSPYR.[A]			0.0520243	0.00272876	0.45	1	2	2	Q14697-1	Q14697-1 [52-61]			Neutral alpha-glucosidase AB [OS=Homo sapiens]	Q14697-1; Q14697-2	0	1145.64	10	FALSE	100	6.64				459675		80.01		5							1.00418e+06	1153619	184549	141231	372640
FALSE		High	Unambiguous	SLTNDWEDHLAVK	[K].SLTNDWEDHLAVK.[H]			0.00878303	0.0010893	0.766	2	3	22	P07900; P08238	P07900 [315-327]; P08238 [307-319]			Heat shock protein HSP 90-alpha [OS=Homo sapiens] Heat shock protein HSP 90-beta [OS=Homo sapiens]	P07900-2; P07900; P08238	0	1527.74	13	FALSE	0.704	-0.51	0.00010872	0.00195093	8.91467e+06	6.27171e+06	8.75	10.83	6	6	4.03763e+06	2.12813e+06	3.56127e+06	3388049	3.95133e+06	4.17873e+06	6.15832e+06	6033821	5.13445e+06	7.1196e+06	4310637	5.46357e+06	8.66173e+06	7.41334e+06	9.63808e+06	9.26611e+06
FALSE		High	Unambiguous	SITVLVEGENTR	[R].SITVLVEGENTR.[I]			0.0670689	0.00359603	0.404	1	3	2	P33993-1	P33993-1 [252-263]			DNA replication licensing factor MCM7 [OS=Homo sapiens]	P33993-2; P33993-1; P33993-3	0	1317.7	12	FALSE
FALSE		High	Unambiguous	SLYVPVMITWNPHWYR	[R].SLYVPVMITWNPHWYR.[Q]			0.0391295	0.00194901	0.501	1	1	3	Q86TG7-1	Q86TG7-1 [665-680]			Retrotransposon-derived protein PEG10 [OS=Homo sapiens]	Q86TG7-1	0	2062.04	16	FALSE	100	6.64				3.49558e+06		45.87		6							1.35394e+06	1.81495e+06	4.05491e+06	5.34339e+06	2.39126e+06	3.54082e+06
FALSE		High	Unambiguous	SNAPGPPLHIGASHLPR	[R].SNAPGPPLHIGASHLPR.[G]			0.0185037	0.0010893	0.634	1	2	22	Q9H0E3	Q9H0E3 [216-232]			Histone deacetylase complex subunit SAP130 [OS=Homo sapiens]	Q9H0E3; Q9H0E3-3	0	1720.92	17	FALSE	0.448	-1.16	0.00444147	0.0387728	1.06393e+06	477129	29.88	42.85	6	6	657179	403854	272697	247942	493407	476649	619959	617399	415606	515791	176339	187258	1.40981e+06	1.40683e+06	738015	678106
FALSE		High	Unambiguous	SNEILTAIIQGMR	[K].SNEILTAIIQGMR.[K]			0.000616442	0.0010893	1.235	1	2	1	Q14974	Q14974 [170-182]			Importin subunit beta-1 [OS=Homo sapiens]	Q14974; Q14974-2	0	1445.78	13	FALSE
FALSE		High	Unambiguous	SNLAYDIVQLPTGLTGIK	[K].SNLAYDIVQLPTGLTGIK.[V]			8.09081e-06	0.0010893	1.998	1	2	7	P34932	P34932 [85-102]			Heat shock 70 kDa protein 4 [OS=Homo sapiens]	P34932-2; P34932	0	1903.05	18	FALSE	0.311	-1.68	0.0234883	0.113234	2.43498e+06	758086	43.58	46.84	6	4	505507	266256	1.13611e+06	1.11619e+06	1.07621e+06	1.14465e+06			973033	1.27834e+06	371857	475387	1.08444e+06	927503	3.07471e+06	3.05271e+06
FALSE		High	Unambiguous	SPHQGFMPGAHVFSGGVLDAADR	[R].SPHQGFMPGAHVFSGGVLDAADR.[S]			0.015623	0.0010893	0.664	1	1	2	A8MXV4	A8MXV4 [50-72]			nucleoside diphosphate-linked moiety X motif 19 [OS=Homo sapiens]	A8MXV4	0	2353.11	23	FALSE	0.01	-6.64			35054.7		58.52		5			6181.21	12952.7	11726.7	38268.2	21336.9								21532.2	35054.7	32071.8
FALSE		High	Unambiguous	SPQDDASSPHLQVMLQIHLPGR	[R].SPQDDASSPHLQVMLQIHLPGR.[H]			0.100586	0.0064943	0.329	1	1	3	Q86TG7-1	Q86TG7-1 [339-360]			Retrotransposon-derived protein PEG10 [OS=Homo sapiens]	Q86TG7-1	0	2426.22	22	FALSE
FALSE		High	Unambiguous	SQAALNPHNTVFDAK	[K].SQAALNPHNTVFDAK.[R]			0.0171955	0.0010893	0.647	1	2	3	P17066	P17066 [59-73]			Heat shock 70 kDa protein 6 [OS=Homo sapiens]	P48741; P17066	0	1612.81	15	FALSE
FALSE		High	Unambiguous	SQIFSTASDNQPTVTIK	[K].SQIFSTASDNQPTVTIK.[V]			8.99271e-05	0.0010893	1.574	1	1	5	P11021	P11021 [448-464]			78 kDa glucose-regulated protein [OS=Homo sapiens]	P11021	0	1836.93	17	FALSE
FALSE		High	Unambiguous	SQIHDIVLVGGSTR	[K].SQIHDIVLVGGSTR.[I]			1.34896e-05	0.0010893	1.908	1	2	256	P11142-1	P11142-1 [329-342]			Heat shock cognate 71 kDa protein [OS=Homo sapiens]	P11142-1; P11142-2	0	1481.81	14	FALSE	0.911	-0.13	0.857141	0.933105	8.28727e+07	7.55105e+07	24.69	29.72	6	6	3.22287e+07	1.72346e+07	41277178	40464384	37314593	3.82402e+07	7.19739e+07	6.75753e+07	1.13918e+08	1.25901e+08	5.52085e+07	6.68376e+07	6.91387e+07	6.00367e+07	1.11711e+08	1.10668e+08
FALSE		High	Unambiguous	SQTEAVTFLANHDDSR	[R].SQTEAVTFLANHDDSR.[A]			8.81035e-06	0.0010893	1.983	1	1	51	Q9Y2S7	Q9Y2S7 [150-165]			Polymerase delta-interacting protein 2 [OS=Homo sapiens]	Q9Y2S7	0	1790.83	16	FALSE	0.843	-0.25	0.24008	0.448241	3.50532e+07	2.95374e+07	20.88	32.06	6	6	17767100	9254328	17588760	16660135	13218817	14285046	27509958	29959642	40896352	42531576	14706048	20993716	3.81149e+07	3.22375e+07	4.76015e+07	4.55644e+07
FALSE		High	Unambiguous	SQVFSTAADGQTQVEIK	[K].SQVFSTAADGQTQVEIK.[V]			0.0880024	0.00584769	0.354	1	1	6	P38646	P38646 [469-485]			Stress-70 protein, mitochondrial [OS=Homo sapiens]	P38646	0	1808.9	17	FALSE
FALSE		High	Unambiguous	SQYEQLAEQNR	[R].SQYEQLAEQNR.[K]			0.00712571	0.0010893	0.803	1	1	2	KRT10	KRT10 [323-333]			Keratin, type I cytoskeletal 10 OS=Homo sapiens GN=KRT10 PE=1 SV=6	KRT10	0	1365.64	11	TRUE	0.01	-6.64			83738.1		56.61		6		35478.5	26447.7	45877.4	45290.3	9792.33	14469.1							76110.2	92130.5	124161	123866
FALSE		High	Unambiguous	SQYEQLAEQNRK	[R].SQYEQLAEQNRK.[D]			0.00453238	0.0010893	0.883	1	1	23	KRT10	KRT10 [323-334]			Keratin, type I cytoskeletal 10 OS=Homo sapiens GN=KRT10 PE=1 SV=6	KRT10	1	1493.73	12	TRUE	0.457	-1.13	0.035634	0.153464	9.24949e+06	4.23077e+06	39.45	54.27	6	6	3553554	3.92482e+06	4.35323e+06	4.10342e+06	1.98344e+06	2.86167e+06	3.24651e+06	5.2084e+06	6657492	7318701	1.16241e+06	2187784	7.62327e+06	1.36721e+07	1.17814e+07	1.12226e+07
FALSE		High	Unambiguous	SRAEAESWYQTK	[RK].SRAEAESWYQTK.[Y]			0.00351329	0.0010893	0.928	1	7	8	KRT6B	KRT6B [348-359]			Keratin, type II cytoskeletal 6B OS=Homo sapiens GN=KRT6B PE=1 SV=5	KRT6B; KRT6A; KRT75; Krt6a; Krt75; Krt79; KRT6C	1	1455.69	12	TRUE	0.01	-6.64			190468		42.36		4				49996.8	45808.8	116234	139522									135309	125284
FALSE		High	Unambiguous	SRGFGFVLFK	[R].SRGFGFVLFK.[ED]			0.00260238	0.0010893	0.981	1	7	1	O14979-1	O14979-1 [188-197]			Heterogeneous nuclear ribonucleoprotein D-like [OS=Homo sapiens]	Q14103-3; O14979-3; Q14103; O14979-1; Q14103-2; O14979-2; Q14103-4	1	1157.65	10	FALSE
FALSE		High	Unambiguous	SRTEAESWYQTK	[R].SRTEAESWYQTK.[Y]			0.0537866	0.00272876	0.444	1	3	3	KRT5	KRT5 [354-365]			Keratin, type II cytoskeletal 5 OS=Bos taurus GN=KRT5 PE=1 SV=1	KRT5; Krt5; KRT5	1	1485.7	12	TRUE	0.01	-6.64			179391		33.67		4				87199.3	90783.4	59118.2	62273.4									235992	248287
FALSE		High	Unambiguous	STAGDTHLGGEDFDNR	[K].STAGDTHLGGEDFDNR.[M]			1.38136e-08	0.0010893	3.12	2	3	245	P54652; P11142-1	P54652 [224-239]; P11142-1 [221-236]			Heat shock-related 70 kDa protein 2 [OS=Homo sapiens] Heat shock cognate 71 kDa protein [OS=Homo sapiens]	P54652; P11142-1; P11142-2	0	1691.73	16	FALSE	0.675	-0.57	0.0605698	0.200328	3.60351e+08	2.43175e+08	31.46	33.71	6	6	1.55347e+08	1.3529e+08	1.49431e+08	142469328	8.42759e+07	1.11839e+08	213965840	261080416	261669856	272953248	83830944	132822304	3.33259e+08	4.71284e+08	4.04414e+08	3.89645e+08
FALSE		High	Unambiguous	STFVLDEFKR	[K].STFVLDEFKR.[K]			0.118438	0.00860454	0.298	1	2	3	P26641	P26641 [286-295]			elongation factor 1-gamma [OS=Homo sapiens]	P26641; P26641-2	1	1241.65	10	FALSE	100	6.64				245661		52.04		6							417240	433475	123850	126091	174060	240251
FALSE		High	Unambiguous	STNGDTFLGGEDFDQALLR	[K].STNGDTFLGGEDFDQALLR.[H]			3.94573e-10	0.0010893	3.746	1	1	39	P38646	P38646 [266-284]			Stress-70 protein, mitochondrial [OS=Homo sapiens]	P38646	0	2055.96	19	FALSE	0.773	-0.37	0.229393	0.446089	1.54685e+07	1.19619e+07	35	37.08	6	6	1.07011e+07	3.52838e+06	3.93543e+06	3.78342e+06	8.43963e+06	1.00274e+07	7.76252e+06	1.27068e+07	1.93702e+07	8542989	8.91041e+06	11127489	2.29566e+07	1.22911e+07	1.06507e+07	1.03474e+07
FALSE		High	Unambiguous	STSTPNVHMVSTTLPVDSR	[R].STSTPNVHMVSTTLPVDSR.[M]			0.0425602	0.00272876	0.486	1	2	9	P04049	P04049 [257-275]			RAF proto-oncogene serine/threonine-protein kinase [OS=Homo sapiens]	P04049; P04049-2	0	2029	19	FALSE	0.01	-6.64			200916		36.08		6		100959	53504.5	44315.2	38898.1	118290	125237							216582	186383	119933	106384
FALSE		High	Unambiguous	SVEAPTERPGER	[R].SVEAPTERPGER.[R]			0.10384	0.0064943	0.323	1	1	2	Q9NWZ8	Q9NWZ8 [185-196]			Gem-associated protein 8 [OS=Homo sapiens]	Q9NWZ8	0	1327.66	12	FALSE	0.01	-6.64			78152.5		76.62		3				29622.3	28575.6		3038.63									80168.6	78152.5
FALSE		High	Unambiguous	SVPQSGPTVRPQEDAWASPGAYGMGGR	[R].SVPQSGPTVRPQEDAWASPGAYGMGGR.[Y]			0.00361416	0.0010893	0.923	1	2	7	O95429	O95429 [228-254]			BAG family molecular chaperone regulator 4 [OS=Homo sapiens]	O95429-2; O95429	0	2758.3	27	FALSE	0.01	-6.64			331583		52		4				246693	161756	107744	107634									667639	442394
FALSE		High	Unambiguous	SWTAADTAAQITQR	[R].SWTAADTAAQITQR.[K]			0.000304922	0.0010893	1.359	1	17	5	P04222	P04222 [156-169]			HLA class I histocompatibility antigen, Cw-3 alpha chain [OS=Homo sapiens]	P30479; P01889; Q31612; P30499; Q29963; Q04826; P30501; Q29865; Q07000; P04222; P30460; P30505; P10321; P30480; P30510; P30504; P30508	0	1519.75	14	FALSE
FALSE		High	Unambiguous	SYDHSENSDLVFGGR	[R].SYDHSENSDLVFGGR.[T]			0.0107031	0.0010893	0.731	1	2	8	O15360	O15360 [997-1011]			Fanconi anemia group A protein [OS=Homo sapiens]	O15360-3; O15360	0	1682.74	15	FALSE	0.01	-6.64			72013.8		18.29		6		41200.3	26273.8	20895.5	27620	28318.2	32901.8							88385	91524.9	56550.8	75539.1
FALSE		High	Unambiguous	SYQLRPGTMIEWGNYWAR	[R].SYQLRPGTMIEWGNYWAR.[A]			0.00988938	0.0010893	0.745	1	2	1	O75323-1	O75323-1 [191-208]			Protein NipSnap homolog 2 [OS=Homo sapiens]	O75323-1; O75323-2	0	2228.07	18	FALSE
FALSE		High	Unambiguous	SYSFPTRPIPR	[R].SYSFPTRPIPR.[L]			0.120308	0.00860454	0.295	1	1	10	Q9NWT6	Q9NWT6 [34-44]			Hypoxia-inducible factor 1-alpha inhibitor [OS=Homo sapiens]	Q9NWT6	0	1320.71	11	FALSE	100	6.64				3.06828e+06		40.86		6							2881920	2760853	5.47825e+06	5560231	1.74847e+06	2.75606e+06
FALSE		High	Unambiguous	TAAENDFVTLKK	[R].TAAENDFVTLKK.[D]			0.00468889	0.0010893	0.877	1	1	33	KRT2	KRT2 [276-287]			Keratin, type II cytoskeletal 2 epidermal OS=Homo sapiens GN=KRT2 PE=1 SV=2	KRT2	1	1336.71	12	TRUE	0.802	-0.32	0.0345771	0.150924	2.79297e+06	2.23863e+06	28.79	30.06	6	6	1.86437e+06	1.28224e+06	1.02785e+06	1.02535e+06	1.00905e+06	1.12238e+06	2.4148e+06	2.51985e+06	2.04615e+06	2306278	864799	1.28012e+06	3.99953e+06	4.46667e+06	2.78172e+06	2.80427e+06
FALSE		High	Unambiguous	TAAENEFVTLKK	[R].TAAENEFVTLKK.[D]			0.104945	0.0064943	0.321	1	6	1	KRT6B	KRT6B [261-272]			Keratin, type II cytoskeletal 6B OS=Homo sapiens GN=KRT6B PE=1 SV=5	KRT6B; KRT6A; Krt6a; KRT6C; KRT3; KRT2	1	1350.73	12	TRUE
FALSE		High	Unambiguous	TAEHFLGFLR	[R].TAEHFLGFLR.[R]			0.000556579	0.0010893	1.253	1	2	11	P18074-1	P18074-1 [325-334]			Tfiih basal transcription factor complex helicase xpd subunit [OS=Homo sapiens]	P18074-2; P18074-1	0	1190.63	10	FALSE	100	6.64				635121		35.28		4							973932		474323		649172	410109
FALSE		High	Unambiguous	TALAEAELEYNPEHVSR	[R].TALAEAELEYNPEHVSR.[S]			0.00407033	0.0010893	0.902	1	1	8	Q9NSE4	Q9NSE4 [251-267]			Isoleucine--tRNA ligase, mitochondrial [OS=Homo sapiens]	Q9NSE4	0	1928.93	17	FALSE
FALSE		High	Unambiguous	TATESFASDPILYRPVAVALDTK	[R].TATESFASDPILYRPVAVALDTK.[G]			0.032143	0.00194901	0.536	1	3	3	P14618	P14618 [93-115]			Pyruvate kinase PKM [OS=Homo sapiens]	P14618-2; P14618-3; P14618	0	2465.29	23	FALSE
FALSE		High	Unambiguous	TDLEMQIEGLKEELAYLR	[R].TDLEMQIEGLKEELAYLR.[K]			0.000248548	0.0010893	1.395	1	1	2	KRT16	KRT16 [235-252]			Keratin, type I cytoskeletal 16 OS=Homo sapiens GN=KRT16 PE=1 SV=4	KRT16	1	2151.1	18	TRUE	0.01	-6.64			1.19251e+06		3.44		2						529706	557779
FALSE		High	Unambiguous	TDSTSDGRPAWMR	[R].TDSTSDGRPAWMR.[T]			0.0268426	0.00194901	0.568	1	1	9	Q14204	Q14204 [4366-4378]			Cytoplasmic dynein 1 heavy chain 1 [OS=Homo sapiens]	Q14204	0	1479.66	13	FALSE	0.01	-6.64			266163		25.58		6		95805.3	72094.8	138976	140277	103795	135187							205526	251142	376118	383649
FALSE		High	Unambiguous	TEEAAADGGGGMQNEPLTPGYHGFPAR	[R].TEEAAADGGGGMQNEPLTPGYHGFPAR.[D]			4.67399e-07	0.0010893	2.5	1	2	21	O43251-8	O43251-8 [50-76]			Isoform 8 of RNA binding protein fox-1 homolog 2 [OS=Homo sapiens]	O43251-6; O43251-8	0	2730.22	27	FALSE	0.01	-6.64			525096		27.57		6		189878	95661.2	247544	228511	279628	211438							407337	333236	669941	624963
FALSE		High	Unambiguous	TEELNKEVASNSELVQSSR	[K].TEELNKEVASNSELVQSSR.[S]			0.0203653	0.0010893	0.617	1	1	1	KRT16	KRT16 [312-330]			Keratin, type I cytoskeletal 16 OS=Homo sapiens GN=KRT16 PE=1 SV=4	KRT16	1	2120.05	19	TRUE
FALSE		High	Unambiguous	TFGMAEEYHR	[R].TFGMAEEYHR.[E]			0.000726709	0.0010893	1.206	1	1	14	Q8N1F7-1	Q8N1F7-1 [121-130]			Nuclear pore complex protein Nup93 [OS=Homo sapiens]	Q8N1F7-1	0	1240.54	10	FALSE	0.69	-0.54	0.14985	0.333803	1.07329e+06	740378	30.35	49.65	6	6	418543	289630	644470	621747	424254	547187	573534	710438	1.43093e+06	1.47023e+06	381286	631236	897880	1.00893e+06	1.74417e+06	1.70044e+06
FALSE		High	Unambiguous	THINIVVIGHVDSGK	[K].THINIVVIGHVDSGK.[S]			7.12449e-05	0.0010893	1.615	1	4	32	P68104	P68104 [6-20]			Elongation factor 1-alpha 1 [OS=Homo sapiens]	Q05639; P68104-2; P68104; Q5VTE0	0	1588.88	15	FALSE	1.807	0.85	0.0588237	0.19844	122579	221544	29.27	38.57	6	4	53818.7	56574.1	39376.3	38216.7	80276.6	62370.5	174303	154878			294934	237574	115455	197076	106566	104520
FALSE		High	Unambiguous	THNLEPYFESFINNLR	[R].THNLEPYFESFINNLR.[R]			5.46747e-06	0.0010893	2.067	1	1	32	KRT1	KRT1 [224-239]			Keratin, type II cytoskeletal 1 OS=Homo sapiens GN=KRT1 PE=1 SV=6	KRT1	0	1993.98	16	TRUE	0.779	-0.36	0.267227	0.487891	1.47735e+07	1.15027e+07	25.09	31.1	6	6	5308230	4193162	7.87128e+06	7.41123e+06	6477811	6221177	10179044	10901739	17469348	18814690	7.81996e+06	9929247	1.13875e+07	1.46069e+07	2.13025e+07	2.02693e+07
FALSE		High	Unambiguous	THNLEPYFESFINNLRR	[R].THNLEPYFESFINNLRR.[R]			3.83601e-05	0.0010893	1.724	1	1	62	KRT1	KRT1 [224-240]			Keratin, type II cytoskeletal 1 OS=Homo sapiens GN=KRT1 PE=1 SV=6	KRT1	1	2150.08	17	TRUE	0.658	-0.6	0.529274	0.697777	7.45089e+06	4.90217e+06	47.12	32.4	6	5	3.20831e+06	2.42177e+06	1.0745e+06	757466	3.49686e+06	4.03463e+06	5.98418e+06	4.69187e+06	1.99082e+06		3812666	4580015	6.88263e+06	8.43623e+06	2.90797e+06	2.07162e+06
FALSE		High	Unambiguous	TKDDIIEFAHR	[R].TKDDIIEFAHR.[V]			0.0015277	0.0010893	1.075	1	2	2	Q96JJ7-1	Q96JJ7-1 [118-128]			Protein disulfide-isomerase TMX3 [OS=Homo sapiens]	Q96JJ7-2; Q96JJ7-1	1	1344.69	11	FALSE	100	6.64				157950		60.48		6							228132	261654	27729.2	70056.9	119020	145248
FALSE		High	Unambiguous	TLAMLPGMDLQYVAWR	[K].TLAMLPGMDLQYVAWR.[N]			0.000675032	0.0010893	1.219	1	1	2	Q8NAT1	Q8NAT1 [379-394]			Protein O-linked-mannose beta-1,4-N-acetylglucosaminyltransferase 2 [OS=Homo sapiens]	Q8NAT1	0	1864.94	16	FALSE
FALSE		High	Unambiguous	TIDDLKNQILNLTTDNANILLQIDNAR	[K].TIDDLKNQILNLTTDNANILLQIDNAR.[L]			0.00433177	0.0010893	0.891	1	1	10	KRT10	KRT10 [202-228]			Keratin, type I cytoskeletal 10 OS=Homo sapiens GN=KRT10 PE=1 SV=6	KRT10	1	3052.63	27	TRUE	0.01	-6.64			644530		55.3		6		483303	206023	104588	58253.2	250941	396072							1.03681e+06	717680	283052	159319
FALSE		High	Unambiguous	TLHEWLQQHGIPGLQGVDTR	[R].TLHEWLQQHGIPGLQGVDTR.[E]			0.000299772	0.0010893	1.362	1	1	61	P27708	P27708 [103-122]			CAD protein [OS=Homo sapiens]	P27708	0	2285.18	20	FALSE	0.331	-1.59	0.0121031	0.0710785	1.31601e+06	435858	41.86	48.27	6	6	560971	413124	575734	566624	284448	216245	433483	414000	672653	717609	168178	204356	1.20342e+06	1.43912e+06	1.55814e+06	1.54968e+06
FALSE		High	Unambiguous	TLHSDDEGTVLDDSR	[R].TLHSDDEGTVLDDSR.[A]			0.000106633	0.0010893	1.544	1	1	18	O00170	O00170 [40-54]			AH receptor-interacting protein [OS=Homo sapiens]	O00170	0	1659.75	15	FALSE	100	6.64				1.38697e+06		34.19		5							1.36896e+06	1720802		1.93025e+06	646777	913691
FALSE		High	Unambiguous	TLNDELEIIEGMKFDR	[K].TLNDELEIIEGMKFDR.[G]			0.000595805	0.0010893	1.241	1	1	16	P10809	P10809 [206-221]			60 kDa heat shock protein, mitochondrial [OS=Homo sapiens]	P10809	1	1922.95	16	FALSE	1.121	0.16	0.537924	0.706299	1.09683e+06	1.22966e+06	81.98	59.55	6	6	581826	276689	201936	179101	1.38257e+06	1.73492e+06	1.35947e+06	1.05071e+06	294256	448946	1.14334e+06	1.81346e+06	1.24816e+06	963848	546510	489830
FALSE		High	Unambiguous	TLNDMRQEYEQLIAK	[K].TLNDMRQEYEQLIAK.[N]			4.7814e-07	0.0010893	2.496	1	1	56	KRT9	KRT9 [322-336]			Keratin, type I cytoskeletal 9 OS=Homo sapiens GN=KRT9 PE=1 SV=3	KRT9	1	1851.93	15	TRUE	0.01	-6.64			2.95731e+06		52.39		6		1.51994e+06	769966	497195	451595	2.20492e+06	2.11984e+06							3.26066e+06	2.68218e+06	1.34559e+06	1.23508e+06
FALSE		High	Unambiguous	TLNPSPAGWFVQQHPELELMSSFR	[R].TLNPSPAGWFVQQHPELELMSSFR.[E]			0.0193576	0.0010893	0.626	1	2	3	Q8N1F8	Q8N1F8 [411-434]			Serine/threonine-protein kinase 11-interacting protein [OS=Homo sapiens]	Q8N1F8; Q8N1F8-2	0	2771.36	24	FALSE	0.01	-6.64			576173		46.08		6		157378	83307.4	209325	214265	424250	425796							337617	290201	566509	586003
FALSE		High	Unambiguous	TLPGSDWTPNAQFITR	[R].TLPGSDWTPNAQFITR.[S]			0.00024159	0.0010893	1.4	1	2	16	P56192	P56192 [468-483]			Methionine--tRNA ligase, cytoplasmic [OS=Homo sapiens]	P56192; P56192-2	0	1803.9	16	FALSE	0.01	-6.64			177644		62.95		6		141451	32735.3	22310.9	23522.6	119974	133476							303449	114034	60381.3	64332.8
FALSE		High	Unambiguous	TLPPAGDSQER	[R].TLPPAGDSQER.[S]			0.127388	0.00860454	0.284	1	3	1	Q96B86-1	Q96B86-1 [128-138]			Repulsive guidance molecule A [OS=Homo sapiens]	Q96B86-1; Q96B86-3; Q96B86-4	0	1170.57	11	FALSE
FALSE		High	Unambiguous	TLSSSTQASLEIDSLFEGIDFYTSITR	[R].TLSSSTQASLEIDSLFEGIDFYTSITR.[A]			1.32752e-08	0.0010893	3.127	1	2	66	P0DMV8	P0DMV8 [273-299]			heat shock 70 kDa protein 1A [OS=Homo sapiens]	P0DMV8-2; P0DMV8	0	2981.46	27	FALSE	100	6.64				3.24353e+06		83.66		4							5.15365e+06	5.99008e+06		2.01486e+06	84458.2
[truncated: 125 more rows]
[truncated: 63 more columns]

## Sheet: Proteins
Checked	Tags	Protein FDR Confidence: Combined	Master	Protein Group IDs	Unique Sequence ID	Accession	Description	Sequence	FASTA Title Lines	Exp. q-value: Combined	Contaminant	Sum PEP Score	# Decoy Protein: Combined	Coverage [%]	# Peptides	# PSMs	# Protein Unique Peptides	# Unique Peptides	# AAs	MW [kDa]	calc. pI	Score Sequest HT: Sequest HT	Coverage [%] (by Search Engine): Sequest HT	# PSMs (by Search Engine): Sequest HT	# Peptides (by Search Engine): Sequest HT	Biological Process	Cellular Component	Molecular Function	Pfam IDs	GO Accessions	Entrez Gene ID	Gene Symbol	Gene ID	Ensembl Gene ID	WikiPathway Accessions	WikiPathways	Reactome Pathway Accessions	Reactome Pathway Accessions (All)	Reactome Pathways	# Protein Annotation Groups	# Protein Pathway Groups	# Razor Peptides	Abundance Ratio: (SAP25_3_REPLICATES_NO_FAIMS) / (SAP25_3_REPLICATES_FAIMS)	Abundance Ratio (log2): (SAP25_3_REPLICATES_NO_FAIMS) / (SAP25_3_REPLICATES_FAIMS)	Abundance Ratio P-Value: (SAP25_3_REPLICATES_NO_FAIMS) / (SAP25_3_REPLICATES_FAIMS)	Abundance Ratio Adj. P-Value: (SAP25_3_REPLICATES_NO_FAIMS) / (SAP25_3_REPLICATES_FAIMS)	Abundances (Grouped): SAP25_3_REPLICATES_FAIMS	Abundances (Grouped): SAP25_3_REPLICATES_NO_FAIMS	Abundances (Grouped) CV [%]: SAP25_3_REPLICATES_FAIMS
[truncated: 472 more rows]
[truncated: 67 more columns]
